# Supplementary material for: Anthracycline-containing and taxane-containing chemotherapy for early-stage operable breast cancer: a patient-level meta-analysis of 100 000 women from 86 randomised trials
Source: PubMed Central journal article supplement (PMC11023015; doi:10.1016/s0140-6736(23)00285-4), 2023-04-15
Supplement: NIHMS1964839-supplement-Supplementary_Materials.pdf [file NIHMS1964839-supplement-Supplementary_Materials.pdf]

# THE LANCET

## Supplementary appendix

This appendix formed part of the original submission and has been peer reviewed.  
We post it as supplied by the authors.

Supplement to: Early Breast Cancer Trialists' Collaborative Group (EBCTCG).  
Anthracycline-containing and taxane-containing chemotherapy for early-stage  
operable breast cancer: a patient-level meta-analysis of 100 000 women from  
86 randomised trials. *Lancet* 2023; **401**: 1277–92.

**Webappendix: Supplementary figures and tables for “Anthracycline and taxane containing chemotherapy for early-stage operable breast cancer: meta-analyses of 100,000 women in 86 randomised trials”**

**CONTENTS LIST** (Click on any listed item with a page number to jump to it.)

**Page 3: CONSORT of trials included**

**Page 4-5: Table of eligibility and baseline characteristics by trial**

**Page 6: Kaplan-Meier graphs, for 4 different endpoints** (any recurrence, distant recurrence at any time, local recurrence as first event, contralateral recurrence as first event)

**Pages 7-13: Forest plots, one line per-trial for 7 different endpoints** (distant recurrence at any time, local recurrence as first event, contralateral recurrence as first event, breast cancer mortality, death without recurrence in year 0, death without recurrence, all-cause mortality)

**Page 14-15: Subgroup analyses for distant recurrence and breast cancer mortality for group A**

**Page 16-18: Subgroup analyses for recurrence, distant recurrence and breast cancer mortality for all trials**

**Pages 19-20: 5 year risk of recurrence within subgroups** for tumour size and tumour grade

**Page 21: Mortality by cause and incidence of second cancers**

**Page 22: AML incidence, forest plot**

**Page 23: Death without recurrence by tumour size and nodal status**

**Page 24: Forest plot, one line per-trial for any recurrence:** Taxane-plus-anthracycline versus anthracycline

**Page 25: Kaplan-Meier curves** (any recurrence, breast cancer mortality, death without recurrence, all-cause mortality) for taxane-plus-anthracycline versus anthracycline based regimens

**Pages 26-31: Forest plots, one line per-trial for any recurrence**

**Page 26:** Taxane versus anthracycline

**Page 27:** Head-to-head taxane (Docetaxel vs Paclitaxel)

**Page 28:** Chemotherapy in fractions

**Page 29:** Sequencing order of anthracycline and taxane chemotherapy

**Page 30:** Longer versus shorter anthracycline/taxane regimens

**Page 31:** Higher versus lower dose

**Pages 32-52: Forest plots, one line per-trial** (breast cancer mortality, death without recurrence and all-cause mortality)

**Pages 32-34:** Taxane-plus-anthracycline versus anthracycline based regimens

**Pages 35-37:** Taxane versus anthracycline

**Pages 38-40:** Head-to-head taxane (Docetaxel vs Paclitaxel)

**Pages 41-43:** Chemotherapy in fractions

**Pages 44-46:** Sequencing order of anthracycline and taxane chemotherapy

**Pages 47-49:** Longer versus shorter anthracycline/taxane regimens

**Pages 50-52:** Higher versus lower dose

**Page 53-54: Kaplan-Meier curves** (any recurrence, breast cancer mortality, death without recurrence and all-cause mortality)

**Page 53:** Longer versus shorter anthracycline/taxane regimens

**Page 54:** Higher versus lower dose

**Pages 55-60: Toxicity** (as reported in the trials publications)

**Pages 55-57:** Taxane plus anthracycline versus taxane without anthracycline

**Page 58:** Docetaxel versus paclitaxel

**Page 59-60:** Paclitaxel or docetaxel in smaller fractions versus larger fractions

**Pages 61-91: Statistical Analysis Plan** including list of relevant trials and publications, and variables requested

**Pages 92-94: EBCTCG search strategies**

### P3: CONSORT of trials included in the meta-analysis of taxane plus anthracycline versus taxane without anthracycline

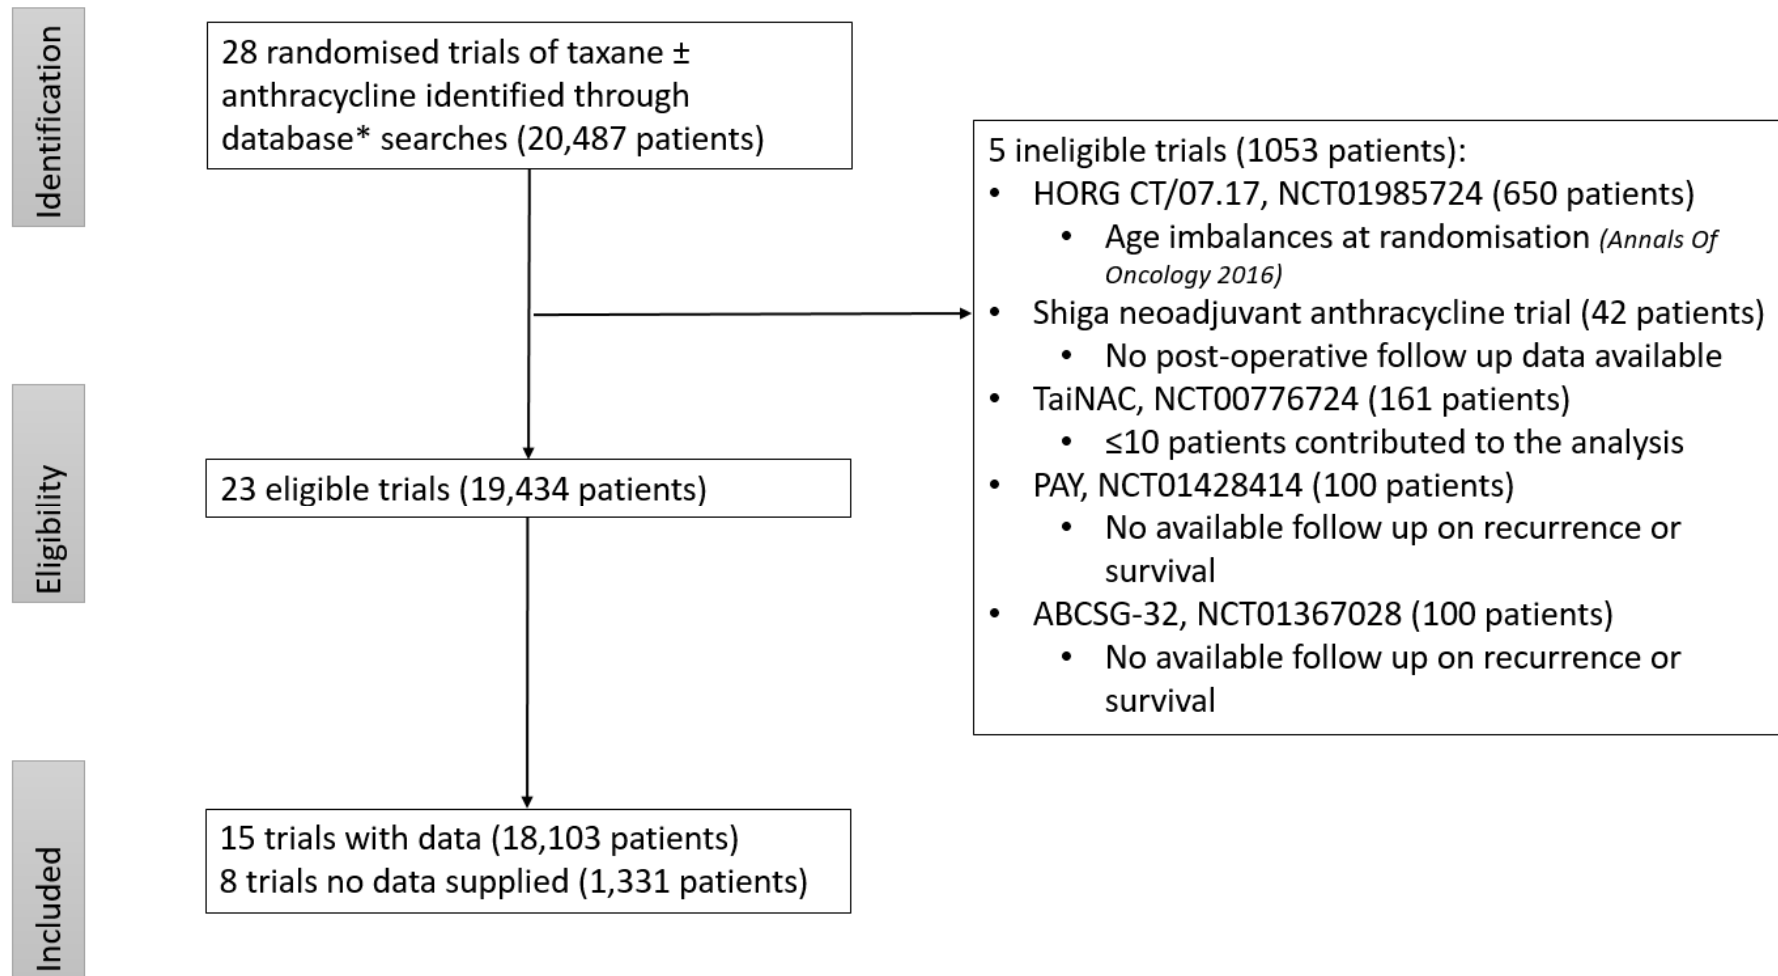

\*Including MEDLINE, Embase, Cochrane Library

# P4-5: Table of eligibility and baseline characteristics by trial

| Trial name (years of recruitment)                                                                             | No. of patients randomised | Key eligibility criteria                                                | Median age in years (range) | Nodal status                              | Tumour size                      | Tumour grade                                                              | ER status                                               | HER2 status                            | Median follow up in years |
|---------------------------------------------------------------------------------------------------------------|----------------------------|-------------------------------------------------------------------------|-----------------------------|-------------------------------------------|----------------------------------|---------------------------------------------------------------------------|---------------------------------------------------------|----------------------------------------|---------------------------|
| <b>(a) Concurrent docetaxel plus anthracycline versus same dose docetaxel plus cyclophosphamide</b>           |                            |                                                                         |                             |                                           |                                  |                                                                           |                                                         |                                        |                           |
| USO 06090/11271 (2007-2009)                                                                                   | 1296                       | 18 to 70yrs<br>N+ or high risk N0<br>ER any<br>HER2-negative            | 53 (26 - 71)                | 35% N0<br>51% N1-3<br>11% N4-9<br>3% N10+ | 38% T1<br>57% T2<br>5% T3/T4     | 12% Well differentiated<br>38% Moderately<br>45% Poorly<br>5% Unknown     | 30% ER-negative<br>70% ER-positive                      | 100% HER2-negative                     | 9.4<br>(7.8 – 10.0)       |
| NSABP B-46-I (2009-2012)                                                                                      | 1077                       | 18 to 70yrs<br>N+ or high risk N0<br>ER any<br>HER2-negative            | 53 (26 - 70)                | 38% N0<br>43% N1-3<br>14% N4-9<br>5% N10+ | 39% T1<br>54% T2<br>8% T3/T4     | 10% Well differentiated<br>37% Moderately<br>52% Poorly<br>1% Unknown     | 33% ER-negative<br>67% ER-positive                      | 100% HER2-negative                     | 6.3<br>(5.1 – 7.1)        |
| Shanghai Jiao Tong (2009-2011)                                                                                | 96                         | 18 to 70yrs<br>TNBC or HER2-positive                                    | 48 (25 - 69)                | *17% N0<br>*83% N+                        | 100% Unknown                     | 24% Moderately differentiated<br>31% Poorly differentiated<br>45% Unknown | 84% ER-negative<br>16% ER-positive                      | 51% HER2-negative<br>49% HER2-positive | 4.7<br>(4.1 – 5.3)        |
| <b>(b) Sequential taxane plus anthracycline versus higher cumulative dose docetaxel plus cyclophosphamide</b> |                            |                                                                         |                             |                                           |                                  |                                                                           |                                                         |                                        |                           |
| <i>HORG CT/07.17 (2007-2013)<br/>Ineligible due to age imbalances</i>                                         | 650                        | 18 to 75yrs<br>N+<br>HER2-negative                                      | 24 (56 - 80)                | 63% N1-3<br>28% N4-9<br>9% N10+           | 100% Unknown                     | 6% Well-differentiated<br>53% Moderately<br>36% Poorly<br>5% Unknown      | 15% ER-negative<br>84% ER-positive<br>1% ER-unknown     | 100% HER2-negative                     | 4.0<br>(2.8 – 4.9)        |
| DBCG 07 READ (2008-2012)                                                                                      | 2012                       | 18 to 75yrs<br>N+ or high risk N0<br>ER any<br>HER2-any<br>TOP2A normal | 51 (23 - 74)                | 45% N0<br>41% N1-3<br>10% N4-9<br>4% N10+ | 59% T1<br>39% T2<br>2% T3/T4     | 17% Well differentiated<br>46% Moderately<br>32% Poorly<br>6% Unknown     | 26% ER-negative<br>74% ER-positive                      | 89% HER2-negative<br>11% HER2-positive | 8.4<br>(7.5 – 7.4)        |
| Kanagawa Japan (2009-2011)                                                                                    | 103                        | 20 to 80yrs<br>HR negative                                              | 55 (26 - 78)                | *40% N0<br>*60% N+                        | *17% T1<br>*64% T2<br>*18% T3/T4 | *17% Well differentiated<br>*24% Moderately<br>*58% Poorly<br>*1% Unknown | 93% ER-negative<br>7% ER-positive<br>(Allred score 3-6) | 72% HER2-negative<br>28% HER2-positive | 3.9<br>(3.3 – 5.1)        |
| NSABP B-49 (2012-2013)                                                                                        | 1870                       | ≥18yrs<br>N+ or high risk N0<br>Any ER<br>HER2-negative                 | 55 (21 - 82)                | 45% N0<br>40% N1-3<br>11% N4-9<br>4% N10+ | 43% T1<br>51% T2<br>6% T3/T4     | 9% Well differentiated<br>36% Moderately<br>55% Poorly                    | 31% ER-negative<br>69% ER-positive                      | 100% HER2-negative                     | 4.4<br>(4.0 – 4.8)        |
| LMU SUCCESS C (2009-2011)                                                                                     | 3643                       | ≥18yrs<br>N+ or high risk N0<br>ER any<br>HER2-negative                 | 55 (24 - 79)                | 42% N0<br>47% N1-3<br>8% N4-9<br>3% N10+  | 44% T1<br>50% T2<br>6% T3/T4     | 6% Well differentiated<br>51% Moderately<br>43% Poorly                    | 25% ER-negative<br>75% ER-positive                      | 100% HER2-negative                     | 5.4<br>(5.0 – 5.5)        |
| WSG Plan B (2009-2011)                                                                                        | 2449                       | 18 to 75yrs<br>N+ or high risk N0<br>ER any<br>HER2-negative            | 55 (25 - 77)                | 59% N0<br>34% N1-3<br>5% N4-9<br>2% N10+  | 54% T1<br>43% T2<br>3% T3/T4     | 4% Well differentiated<br>50% Moderately<br>42% Poorly<br>4% Unknown      | 19% ER-negative<br>73% ER-positive<br>8% Unknown        | 99% HER2-negative<br>1% HER2-positive  | 5.0<br>(4.6 – 5.1)        |

|                                                                                  |      |                                                                |              |                                            |                                            |                                                                          |                                                      |                                        |                      |
|----------------------------------------------------------------------------------|------|----------------------------------------------------------------|--------------|--------------------------------------------|--------------------------------------------|--------------------------------------------------------------------------|------------------------------------------------------|----------------------------------------|----------------------|
| JBCRG-10<br>(2009-2011)                                                          | 67   | 20 to 70yrs<br>T1c-3, N0-1, M0<br>ER any<br>HER2-positive      | 54 (34 - 70) | *63% N0<br>*37% N+                         | 11% T1<br>76% T2<br>13% T3/T4              | 12% Well differentiated<br>40% Moderately<br>34% Poorly<br>14% Unknown   | 41% ER-negative<br>59% ER-positive                   | 100% HER2-<br>positive                 | 4.4<br>(4.2 – 4.9)   |
| JBCRG-09<br>(2009-2012)                                                          | 195  | 20 to 70yrs<br>T1c-3, N0-1, M0<br>ER-positive<br>HER2-negative | 48 (26 - 69) | *49% N0<br>*51% N+                         | 14% T1<br>73% T2<br>13% T3/T4              | 18% Well differentiated<br>40% Moderately<br>14% Poorly<br>28% Unknown   | 100% ER-positive                                     | 100% HER2-<br>negative                 | 5.9<br>(5.3 – 6.5)   |
| MASTER Fudan<br>(2010-2017)                                                      | 1047 | 18 to 75yrs<br>N+ or high risk N0<br>ER any<br>HER2-negative   | 50 (27 - 70) | 41% N0<br>59% N+                           | 44% T1<br>56% T2                           | 66% Moderately<br>34% Poorly                                             | 8% ER-negative<br>92% ER-positive                    | 100% HER2-<br>negative                 | 4.7<br>(3.7 – 6.3)   |
| <b>(c) Taxane plus anthracycline versus taxane ± capecitabine</b>                |      |                                                                |              |                                            |                                            |                                                                          |                                                      |                                        |                      |
| N-SAS-BC 02<br>(2000-2006)                                                       | 1060 | 18 to 70yrs<br>N+<br>ER any<br>HER2-any                        | 53 (24 - 70) | 100% N1-3                                  | 37% T1<br>55% T2<br>7% T3/T4<br>1% Unknown | 100% Unknown                                                             | 43% ER-negative<br>57% ER-positive                   | 100% Unknown                           | 7.5<br>(6.1 – 8.4)   |
| MINDACT<br>(2006-2011)                                                           | 392  | 18 to 70yrs<br>N1-3<br>ER any<br>HER2-any                      | 53 (28 - 70) | 99% N1-3<br>1% N4-9                        | 54% T1<br>42% T2<br>4% T3/T4               | 9% Well differentiated<br>61% Moderately<br>30% Poorly                   | 10% ER-negative<br>90% ER-positive                   | 90% HER2-negative<br>10% HER2-positive | 4.9<br>(4.3 – 5.5)   |
| TaiNAC<br>(2009-2014)<br><i>Ineligible as ≤10<br/>randomised</i>                 | 10   | Age 20+<br>Size 30mm+<br>HER2-negative                         | 46 (30 - 63) | 100% Unknown                               | 20% T1<br>60% T2<br>10% T3<br>10% Unknown  | 10% Well-differentiated<br>20% Moderately<br>20% Poorly<br>50% Unknown   | 20% ER-negative<br>60% ER-positive<br>20% ER-unknown | 100% HER2-<br>negative                 | 2.6<br>(0.7 – 3.0)   |
| ABCSG-32<br>(2011-2014)<br><i>Ineligible no follow-up</i>                        | 100  | ≥18yrs<br>ER any<br>HER2-positive                              | 52 (23 – 79) | *63% N0<br>*37% N+                         | *35% T1<br>*53% T2<br>*11% T3/4            | *2% Well differentiated<br>*30% Moderately<br>*63% Poorly<br>*5% Unknown | 47% ER-negative<br>53% ER-unknown                    | 100% HER2-positive                     | 0.5<br>(0.4 – 0.5)   |
| <b>(d) Taxane plus anthracycline versus taxane plus carboplatin (confounded)</b> |      |                                                                |              |                                            |                                            |                                                                          |                                                      |                                        |                      |
| BCIRG 006<br>(2001-2004)                                                         | 2149 | 18 to 70yrs<br>N+ or high risk N0<br>ER any<br>HER2-positive   | 49 (22 - 74) | 29% N0<br>38% N1-3<br>22% N4-9<br>11% N10+ | 39% T1<br>54% T2<br>6% T3/T4               | 1% Well differentiated<br>29% Moderately<br>65% Poorly<br>5% Unknown     | 50% ER-negative<br>50% ER-positive                   | 100% HER2-<br>positive                 | 10.5<br>(9.0 – 10.6) |
| TaiNAC<br>(2009-2014)<br><i>Ineligible as ≤10<br/>randomised</i>                 | 8    | Age 20+<br>Size 30mm+<br>HER2-negative                         | 52 (38 – 61) | 100% Unknown                               | 25% T1<br>75% T2                           | 25% Well-differentiated<br>38% Moderately<br>37% Unknown                 | 75% ER-positive<br>25% ER-unknown                    | 100% HER2-<br>negative                 | 1.6<br>(1.0 – 3.4)   |
| PATTERN Fudan<br>(2011-2016)                                                     | 647  | 18 to 70yrs<br>N+ or N0 if<br>T>10mm<br>TNBC                   | 51 (23 - 70) | 74% N0<br>26% N+                           | 54% T1<br>46% T2/3                         | 27% Moderately<br>73% Poorly                                             | 100% ER-negative                                     | 100% HER2-<br>negative                 | 5.0<br>(4.0 – 6.9)   |

\*Before neo-adjuvant therapy

HORG CT/07.17, ABCSG-32 and TaiNAC provided data but these trials were ineligible for this meta-analysis. See CONSORT on page 3.

P6: 10-year (\*5-year) cumulative risk of (A) any recurrence, (B) distant recurrence at any time, (C)\* isolated local recurrence as first event, (D)\* contralateral recurrence as first event in trials of taxane plus anthracycline versus taxane without anthracycline

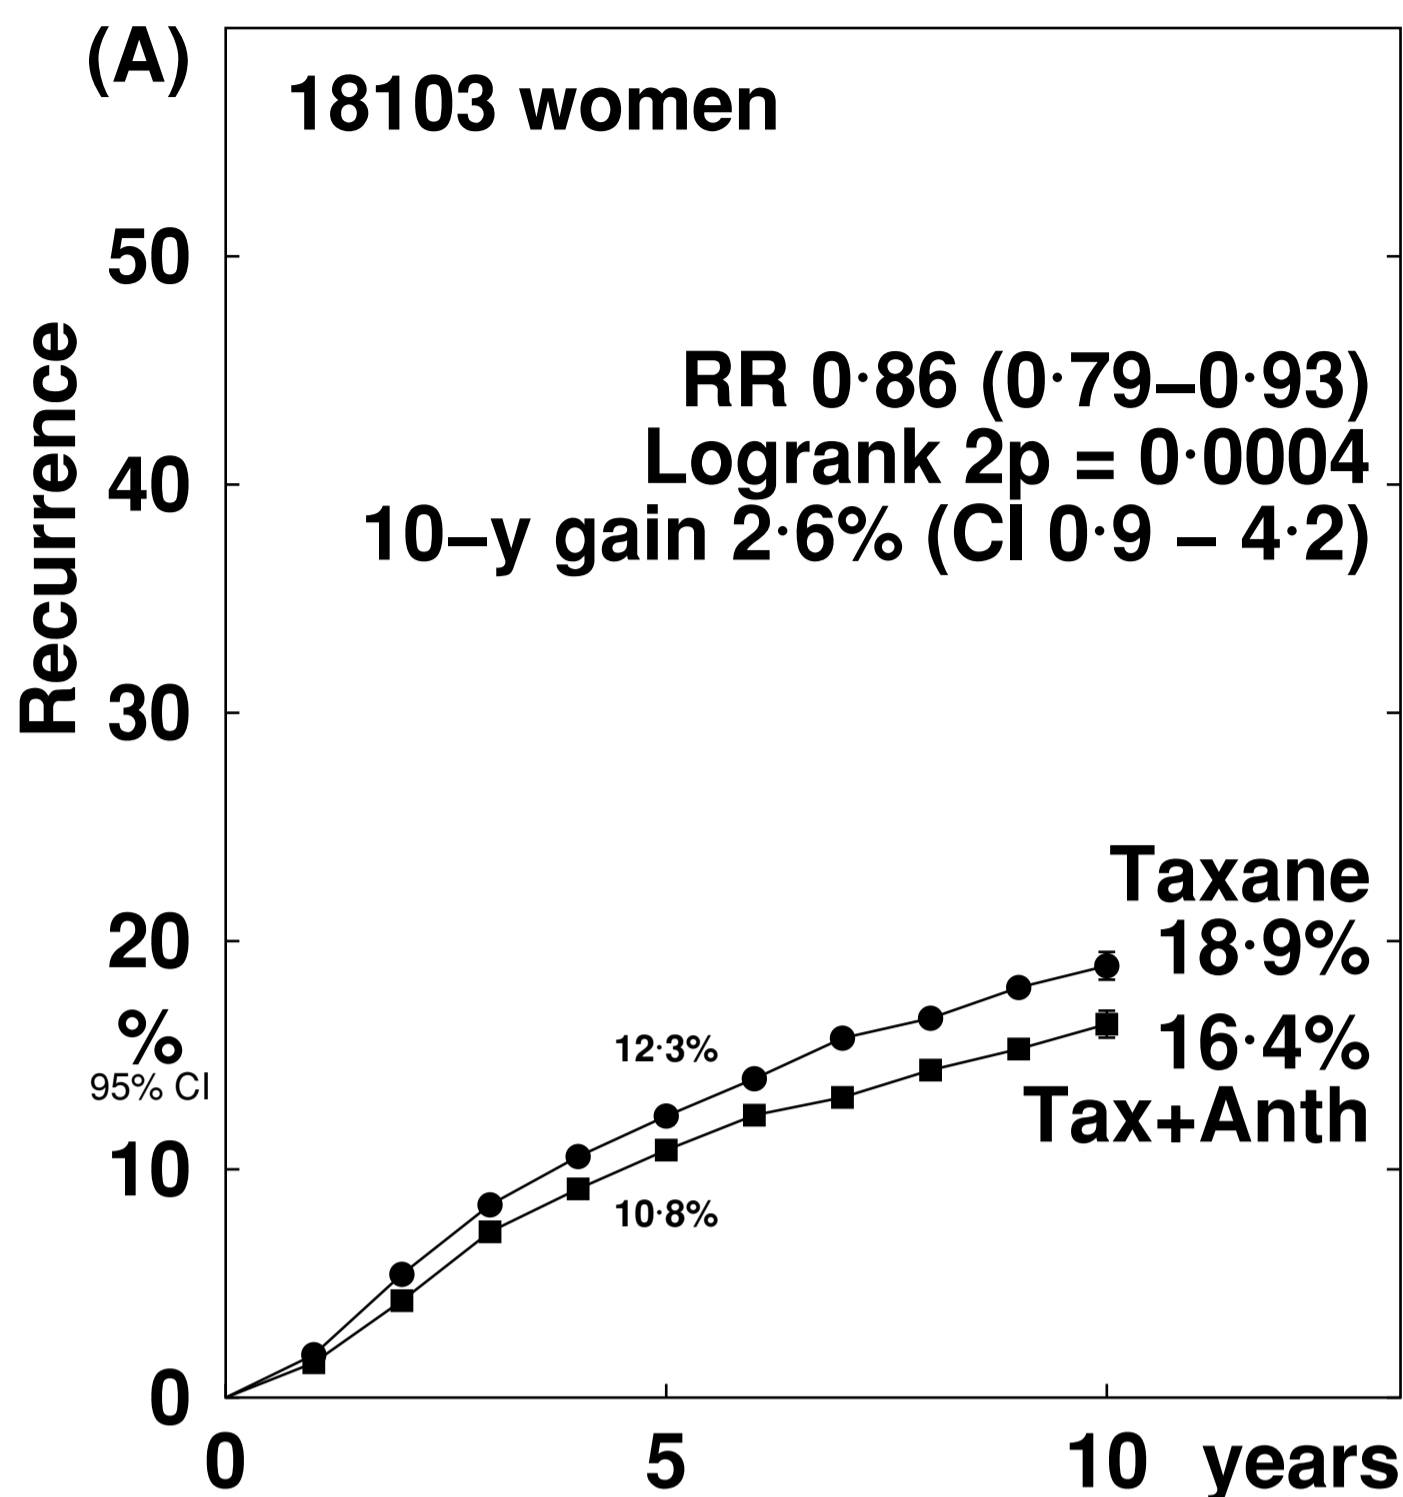

Recurrence rates (% / year) and logrank analyses

| Allocation                 | Years 0 – 4                          | Years 5 – 9                         | Year 10+                         |
|----------------------------|--------------------------------------|-------------------------------------|----------------------------------|
| Tax+Anth                   | 2.34 (900 / 38514)                   | 1.37 (158 / 11575)                  | 0.95 (4 / 420)                   |
| Taxane                     | 2.63 (1008 / 38389)                  | 1.65 (188 / 11388)                  | 0.76 (3 / 396)                   |
| Rate ratio, from (O–E) / V | 0.87 CI 0.79 – 0.95<br>–63.8 / 443.9 | 0.80 CI 0.64 – 0.99<br>–19.1 / 83.3 | 1.83 CI 0.36 – 9.22<br>0.9 / 1.5 |

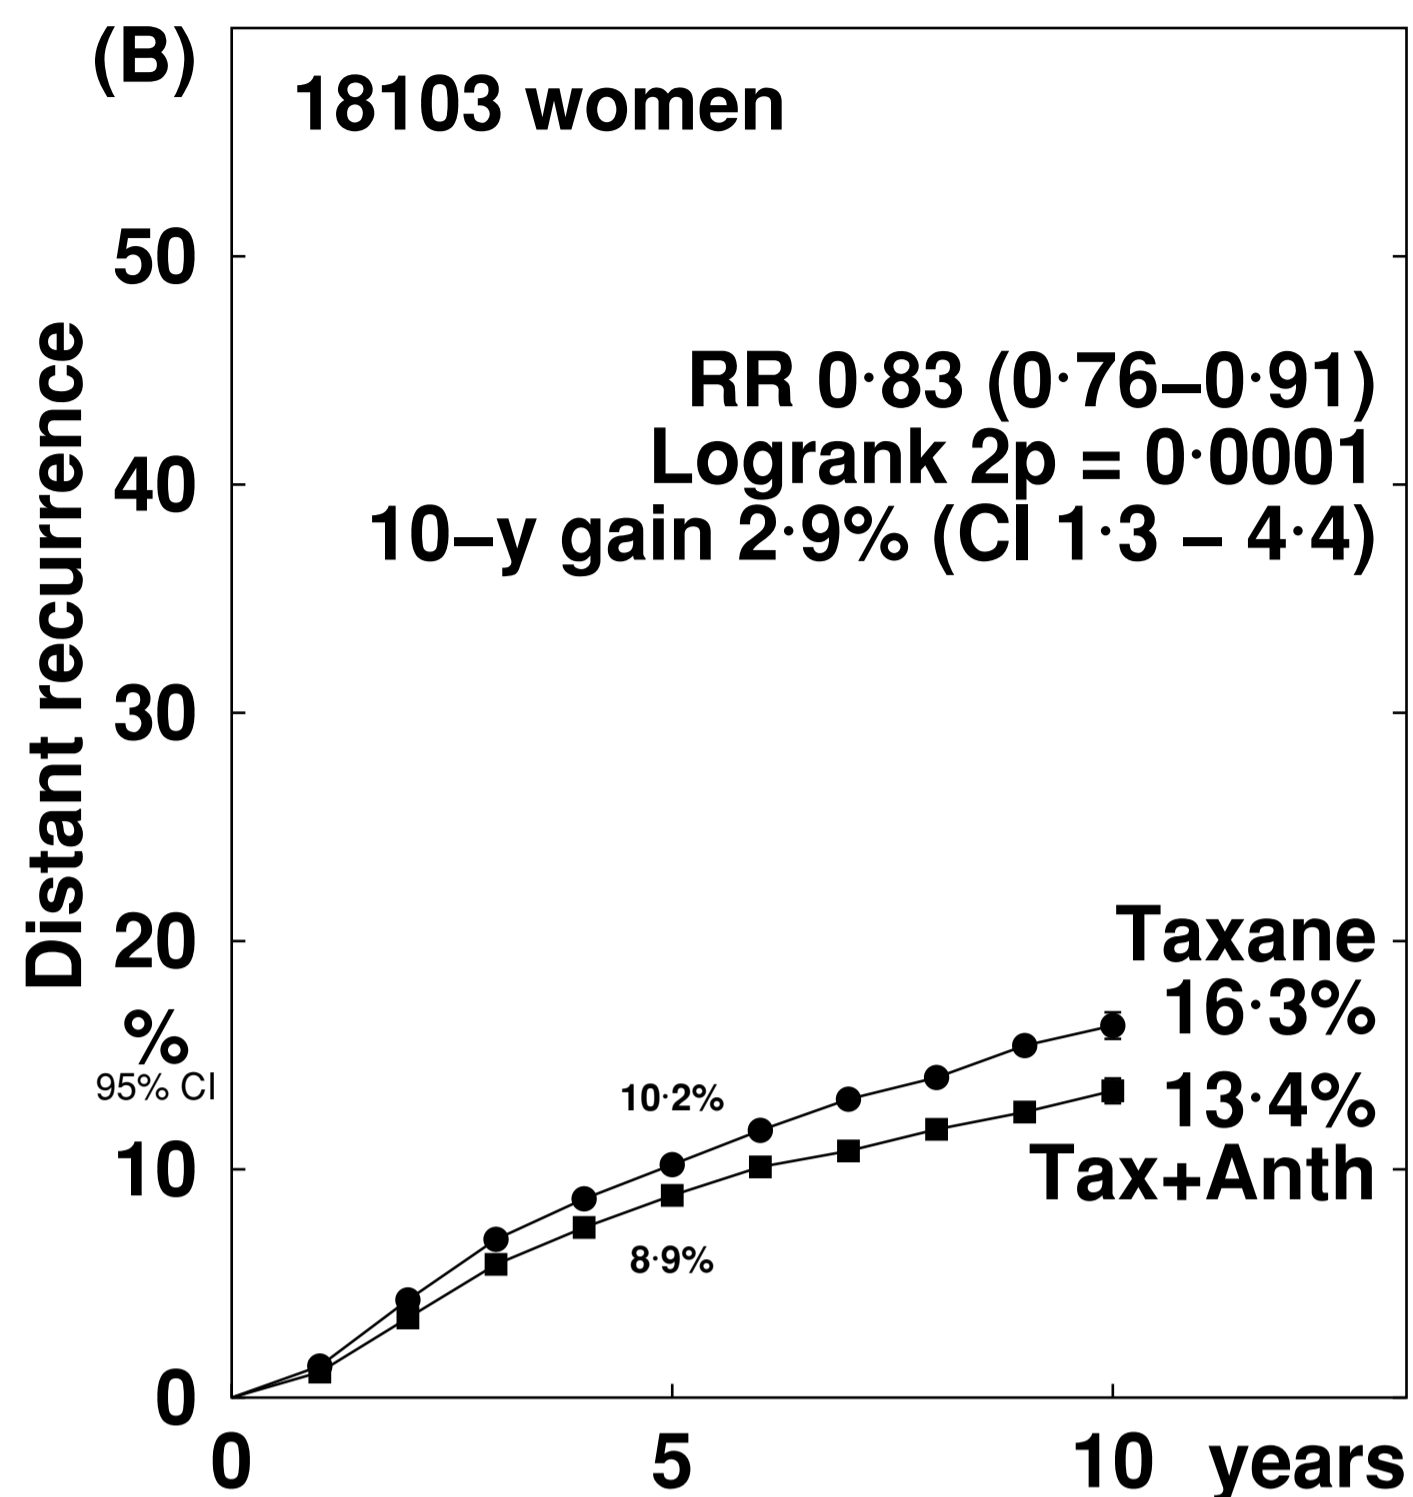

Distant recurrence rates (% / year) and logrank analyses

| Allocation                 | Years 0 – 4                          | Years 5 – 9                         | Year 10+                          |
|----------------------------|--------------------------------------|-------------------------------------|-----------------------------------|
| Tax+Anth                   | 1.88 (732 / 38875)                   | 1.10 (131 / 11893)                  | 0.23 (1 / 434)                    |
| Taxane                     | 2.15 (833 / 38790)                   | 1.46 (171 / 11714)                  | 0.73 (3 / 412)                    |
| Rate ratio, from (O–E) / V | 0.86 CI 0.77 – 0.95<br>–56.8 / 368.4 | 0.73 CI 0.58 – 0.91<br>–23.2 / 72.9 | 0.42 CI 0.06 – 3.02<br>–0.9 / 1.0 |

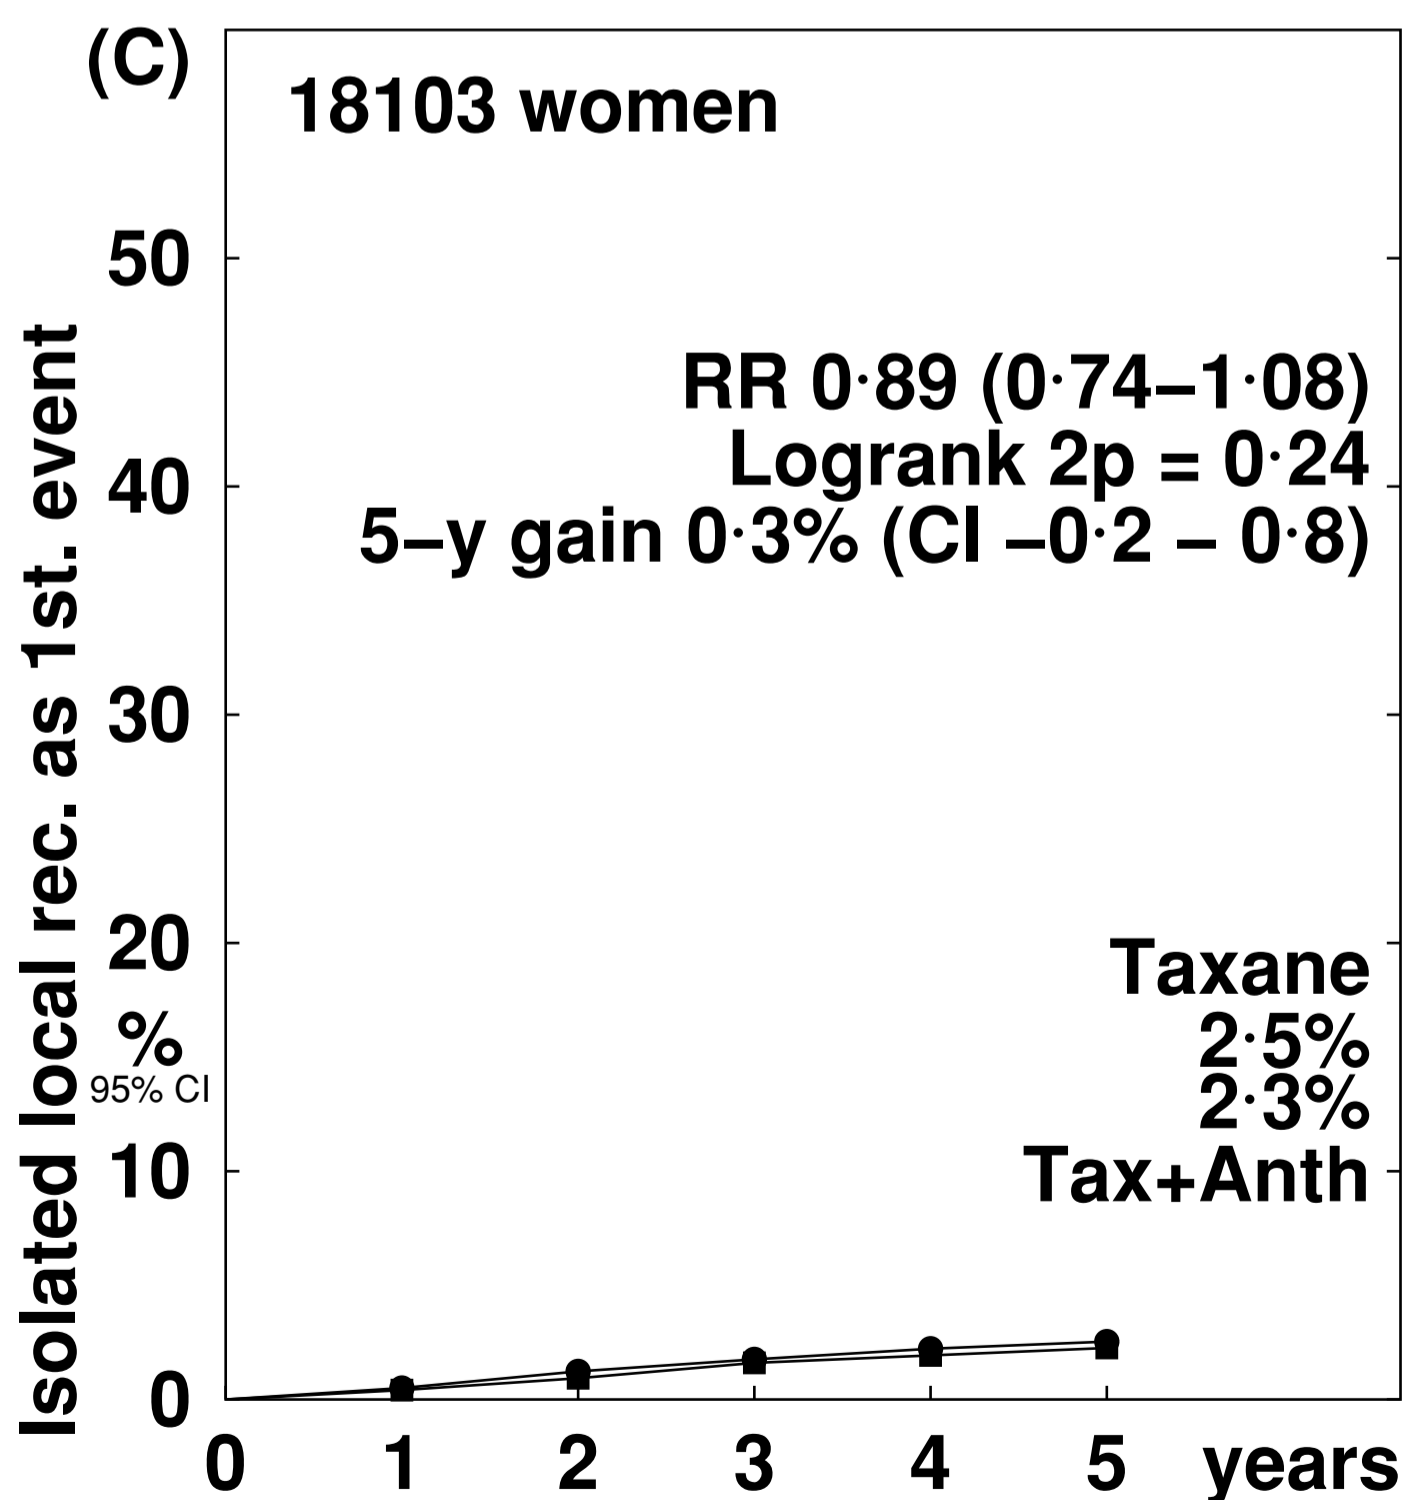

Local recurrence rates (% / year) and logrank analyses

| Allocation                 | Years 0 – 1                         | Years 2 – 4                       | Year 5+                            |
|----------------------------|-------------------------------------|-----------------------------------|------------------------------------|
| Tax+Anth                   | 0.47 (81 / 17098)                   | 0.47 (101 / 21416)                | 0.27 (32 / 11995)                  |
| Taxane                     | 0.61 (104 / 17041)                  | 0.44 (94 / 21347)                 | 0.28 (33 / 11784)                  |
| Rate ratio, from (O–E) / V | 0.76 CI 0.56 – 1.02<br>–12.3 / 44.1 | 1.02 CI 0.77 – 1.36<br>1.0 / 47.0 | 0.95 CI 0.58 – 1.55<br>–0.9 / 15.7 |

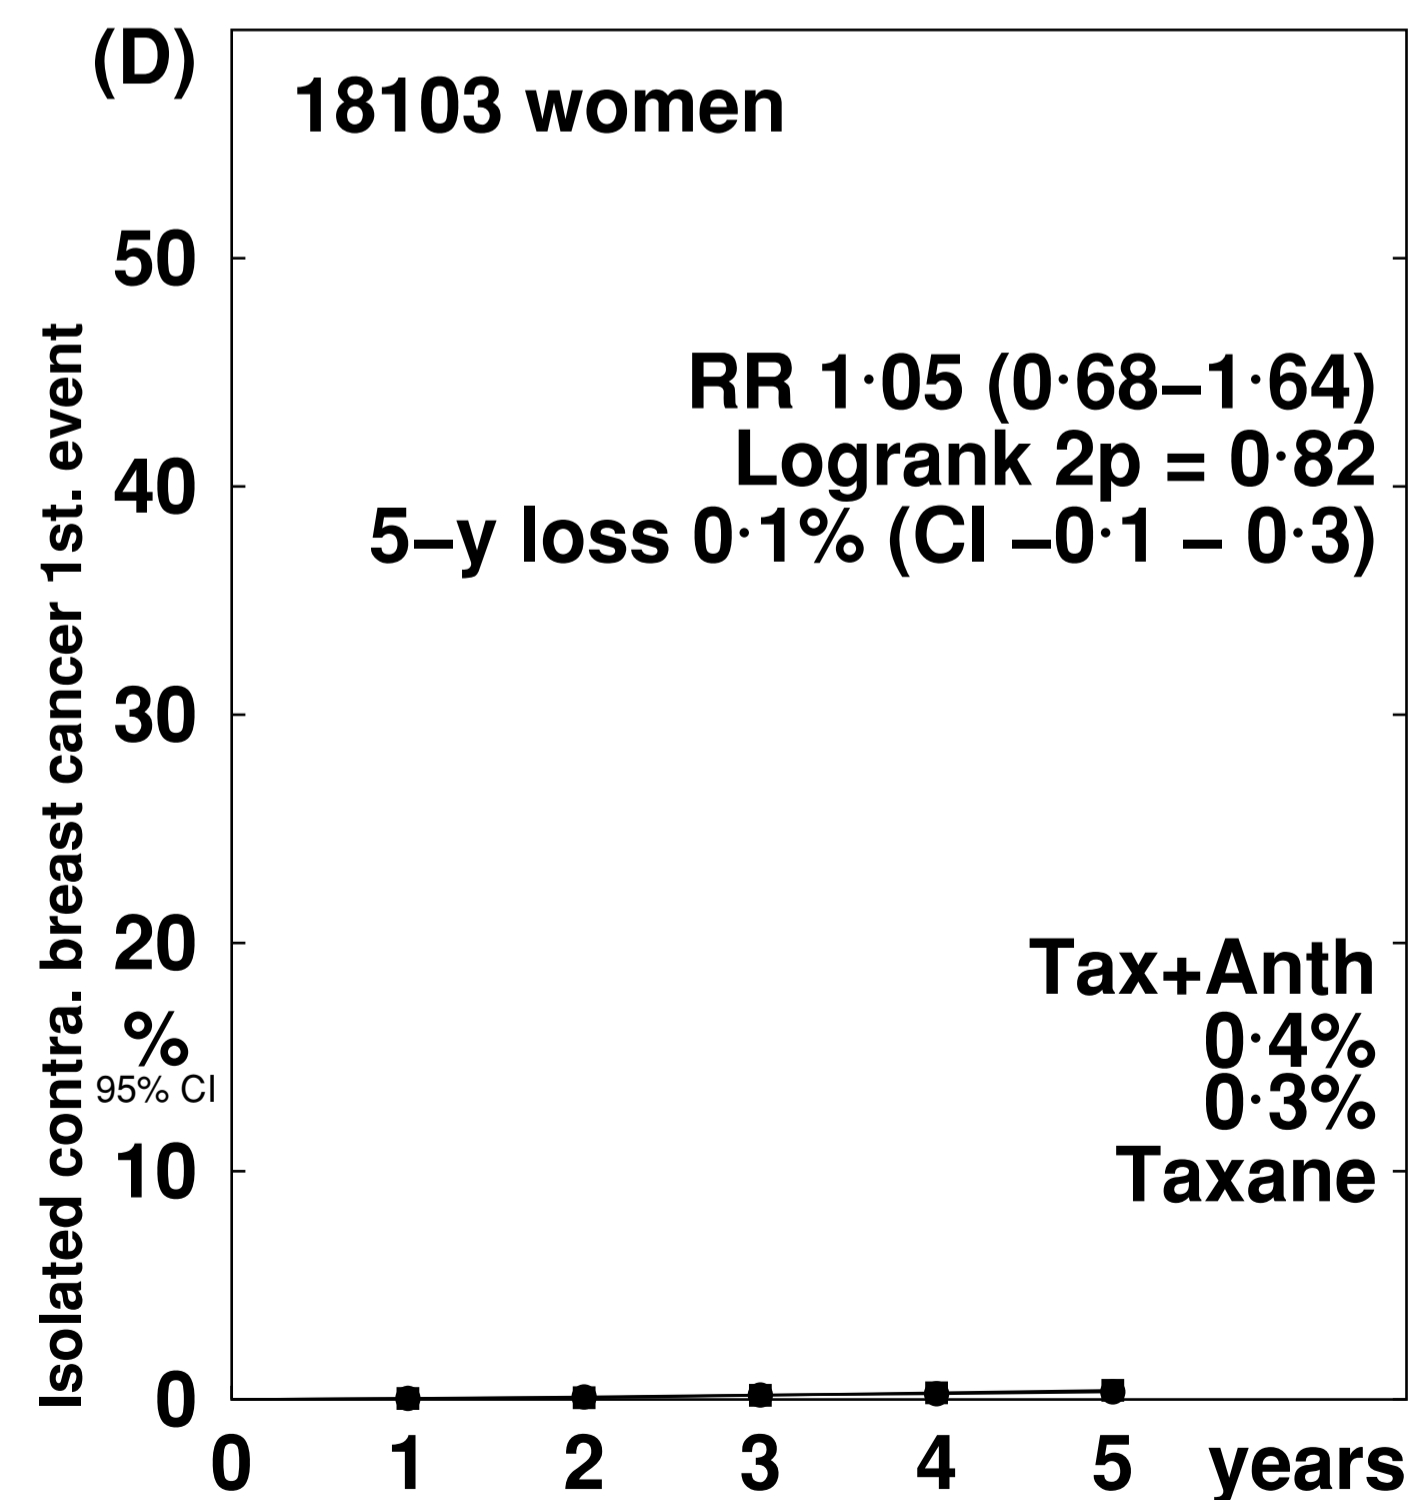

Contralateral breast cancer as first event rates (% / year) and logrank analyses

| Allocation                 | Years 0 – 1                       | Years 2 – 4                      | Year 5+                           |
|----------------------------|-----------------------------------|----------------------------------|-----------------------------------|
| Tax+Anth                   | 0.04 (7 / 17098)                  | 0.11 (23 / 21416)                | 0.10 (12 / 11995)                 |
| Taxane                     | 0.05 (9 / 17041)                  | 0.07 (16 / 21347)                | 0.11 (13 / 11784)                 |
| Rate ratio, from (O–E) / V | 0.71 CI 0.26 – 1.93<br>–1.3 / 3.9 | 1.44 CI 0.76 – 2.72<br>3.5 / 9.5 | 0.83 CI 0.37 – 1.83<br>–1.2 / 6.1 |

# P7: Distant recurrence at any time in trials of taxane plus anthracycline versus taxane without anthracycline

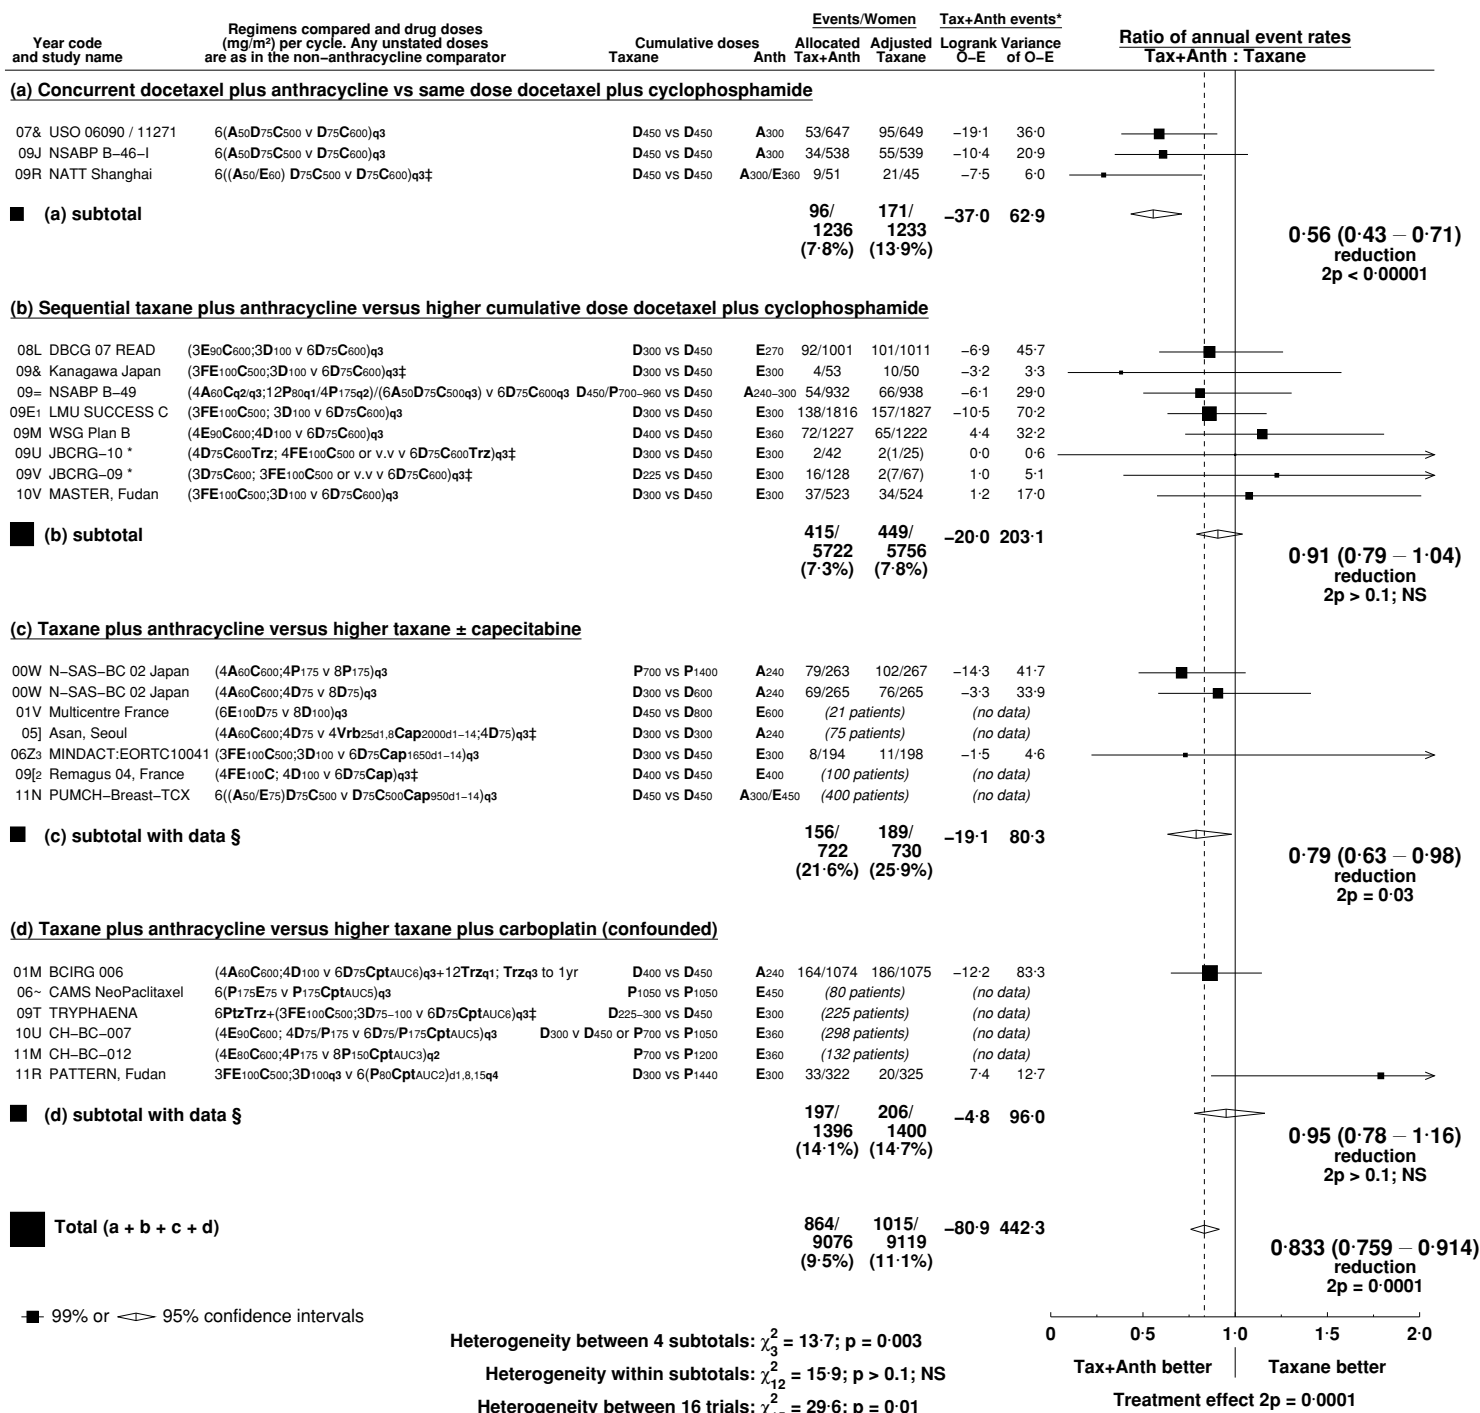

# P8: Isolated local recurrence as first event in trials of taxane plus anthracycline versus taxane without anthracycline

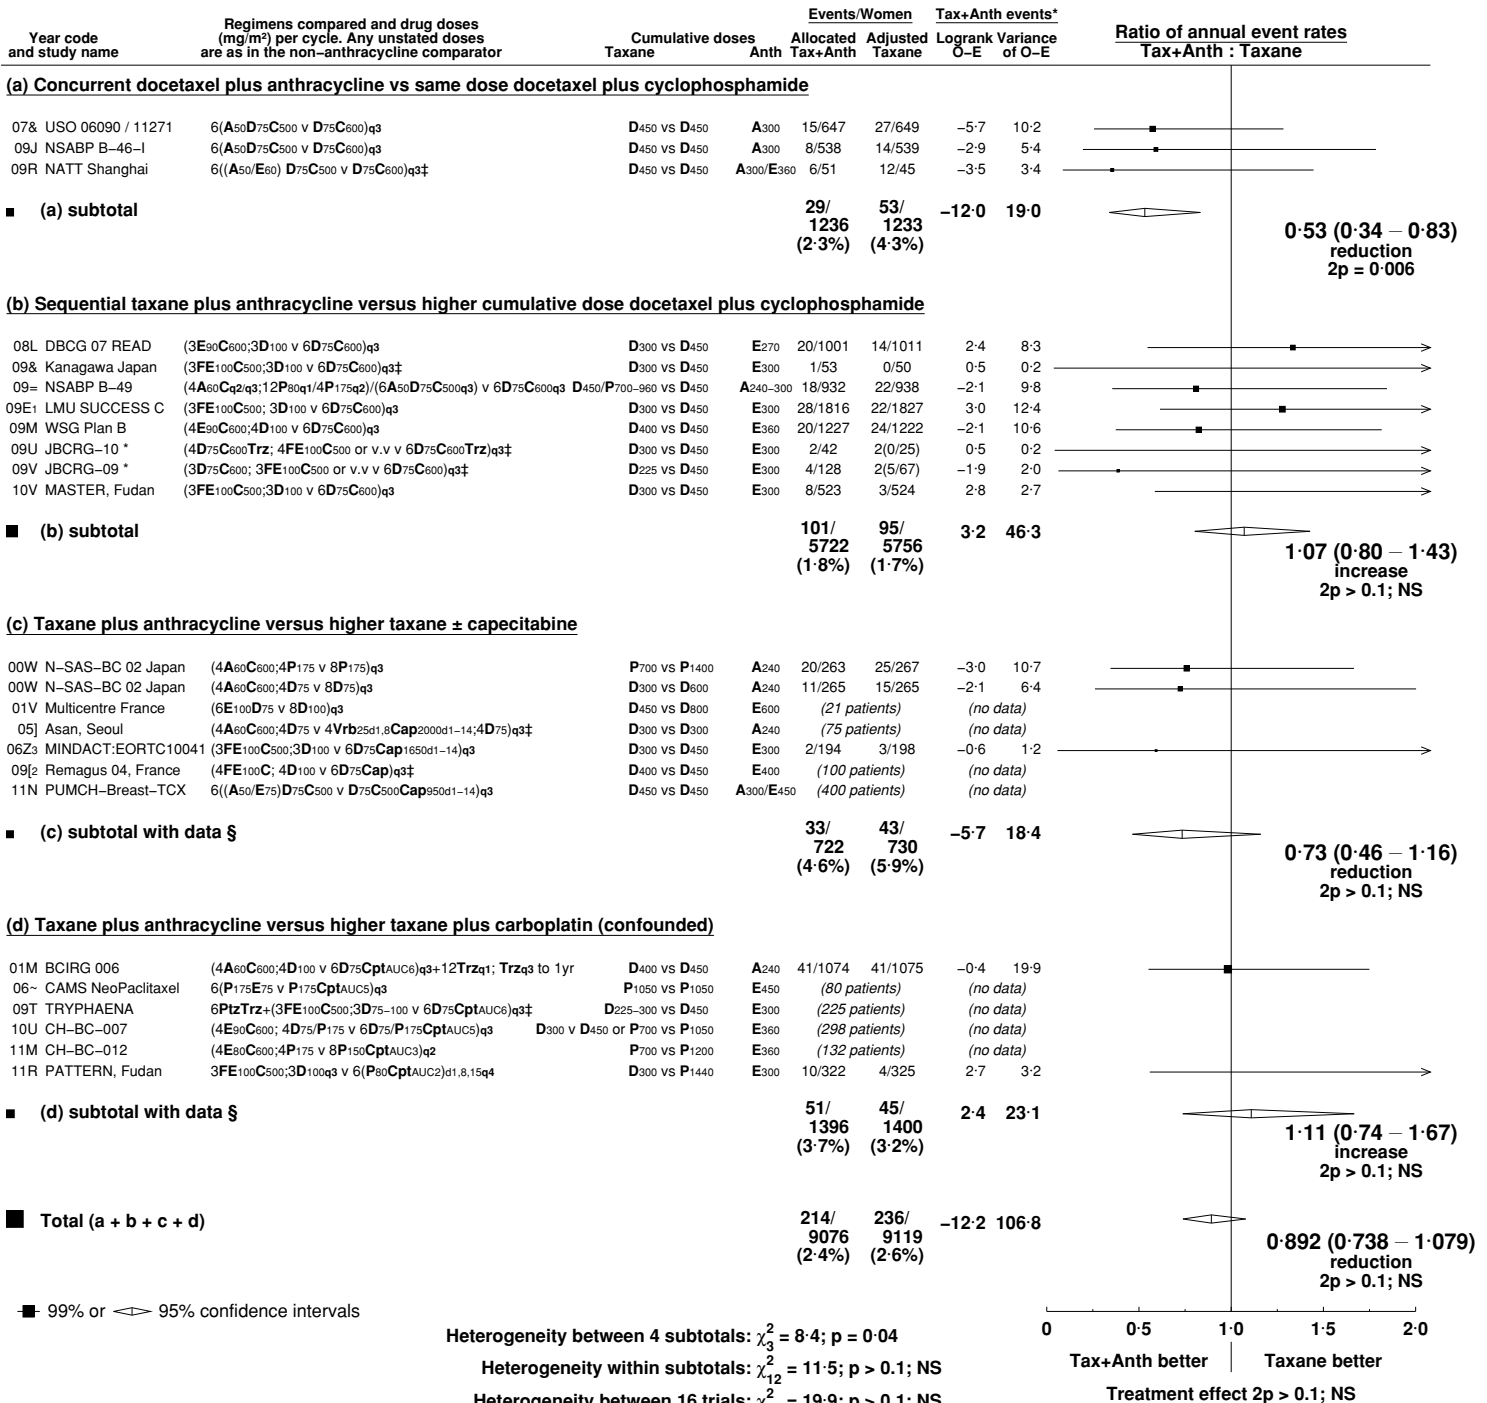

■ 99% or ◁ 95% confidence intervals

Heterogeneity between 4 subtotals:  $\chi^2_3 = 8.4$ ;  $p = 0.04$

Heterogeneity within subtotals:  $\chi^2_{12} = 11.5$ ;  $p > 0.1$ ; NS

Heterogeneity between 16 trials:  $\chi^2_{15} = 19.9$ ;  $p > 0.1$ ; NS

\* For balance, control patients in 3-way trials or trial strata count half or twice in subtotal(s) and in final total of events/patients.

‡ Pre-operative chemotherapy

v.v Vice versa

Taxanes: D = docetaxel; P = paclitaxel

Anthracyclines: A = doxorubicin (Adriamycin); E = epirubicin

Other agents: C = cyclophosphamide; F = fluorouracil; M = methotrexate; Trz = trastuzumab; Vrb = vinorelbine; Cap = capecitabine; Cpt = carboplatin; Ptz = pertuzumab



# P9: Contralateral recurrence as first event in trials of taxane plus anthracycline versus taxane without anthracycline

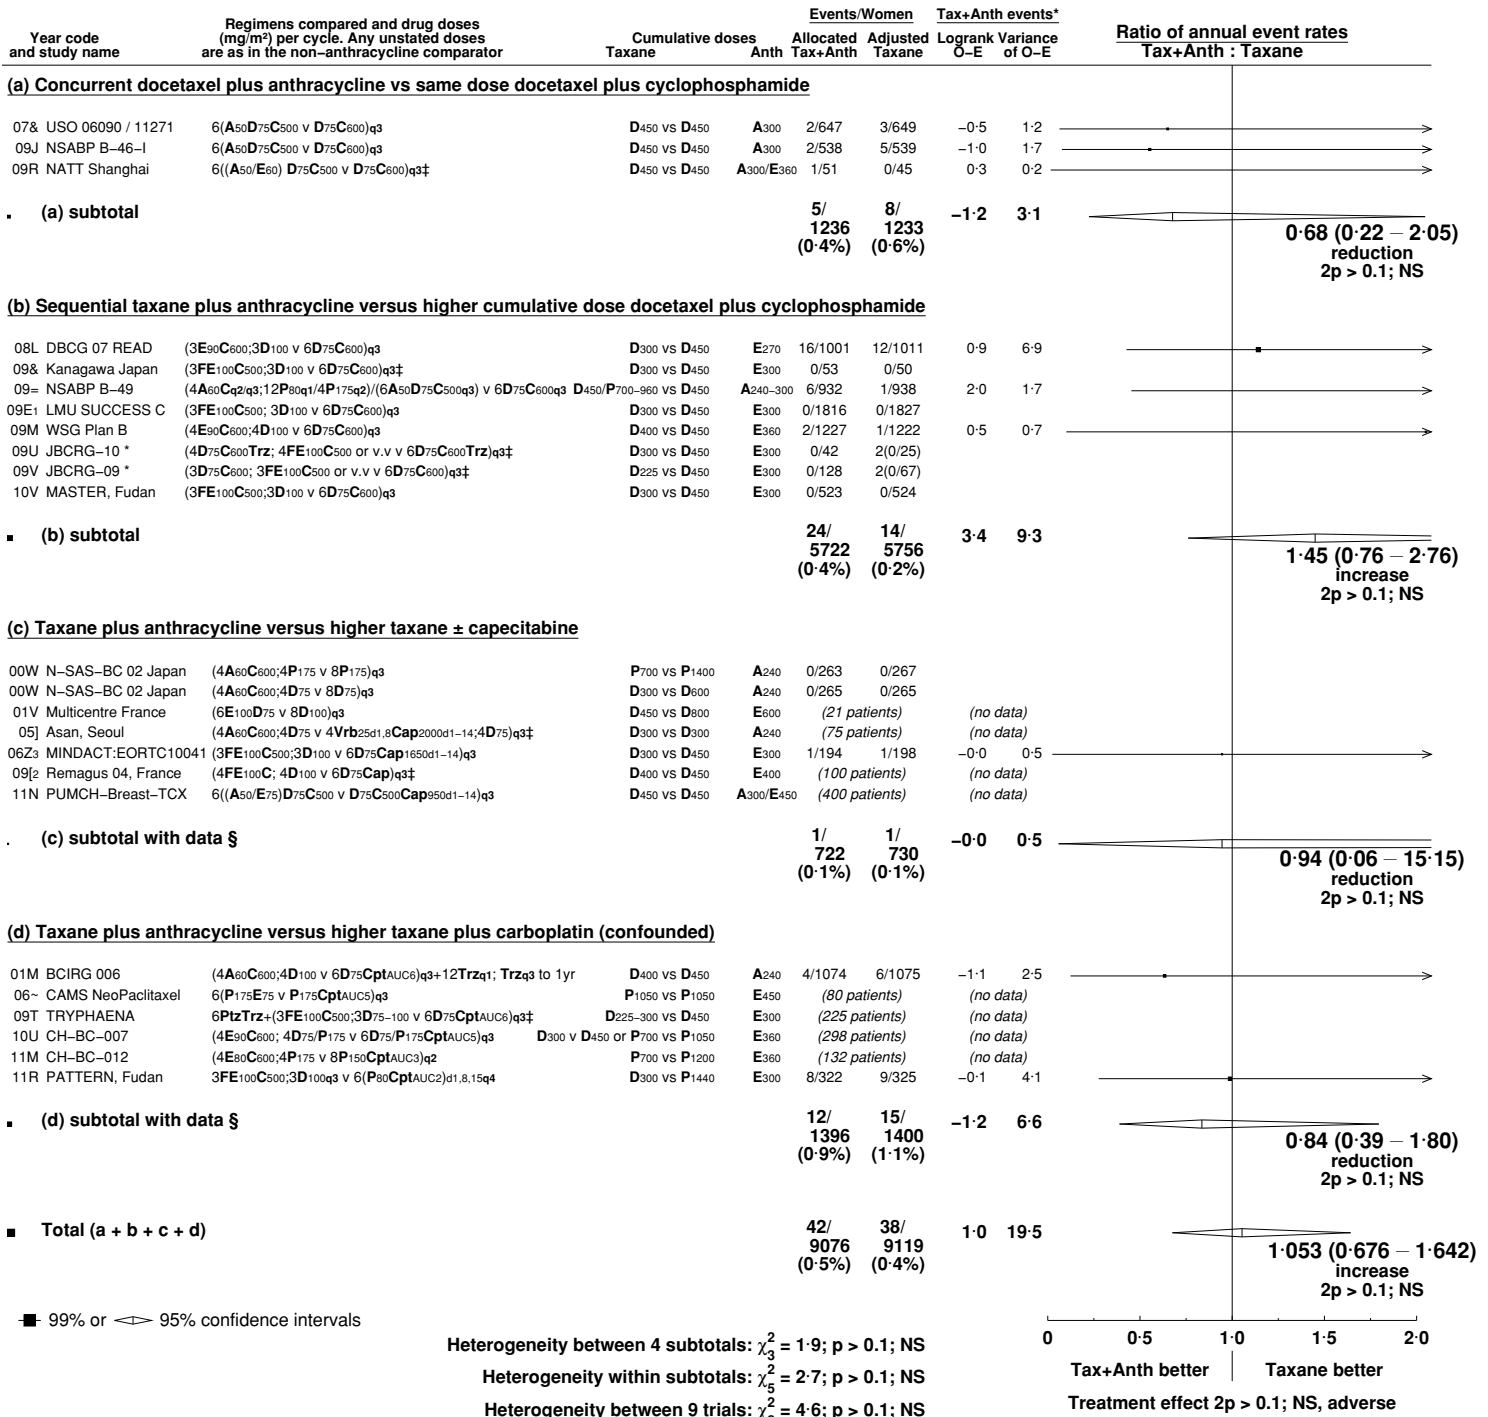

\* For balance, control patients in 3-way trials or trial strata count half or twice in subtotal(s) and in final total of events/patients.

‡ Pre-operative chemotherapy v.v Vice versa

Taxanes: D = docetaxel; P = paclitaxel

Anthracyclines: A = doxorubicin (Adriamycin); E = epirubicin

Other agents: C = cyclophosphamide; F = fluorouracil; M = methotrexate; Trz = trastuzumab; Vrb = vinorelbine; Cap = capecitabine; Cpt = carboplatin; Ptz = pertuzumab

# P10: Breast cancer mortality in trials of taxane plus anthracycline versus taxane without anthracycline

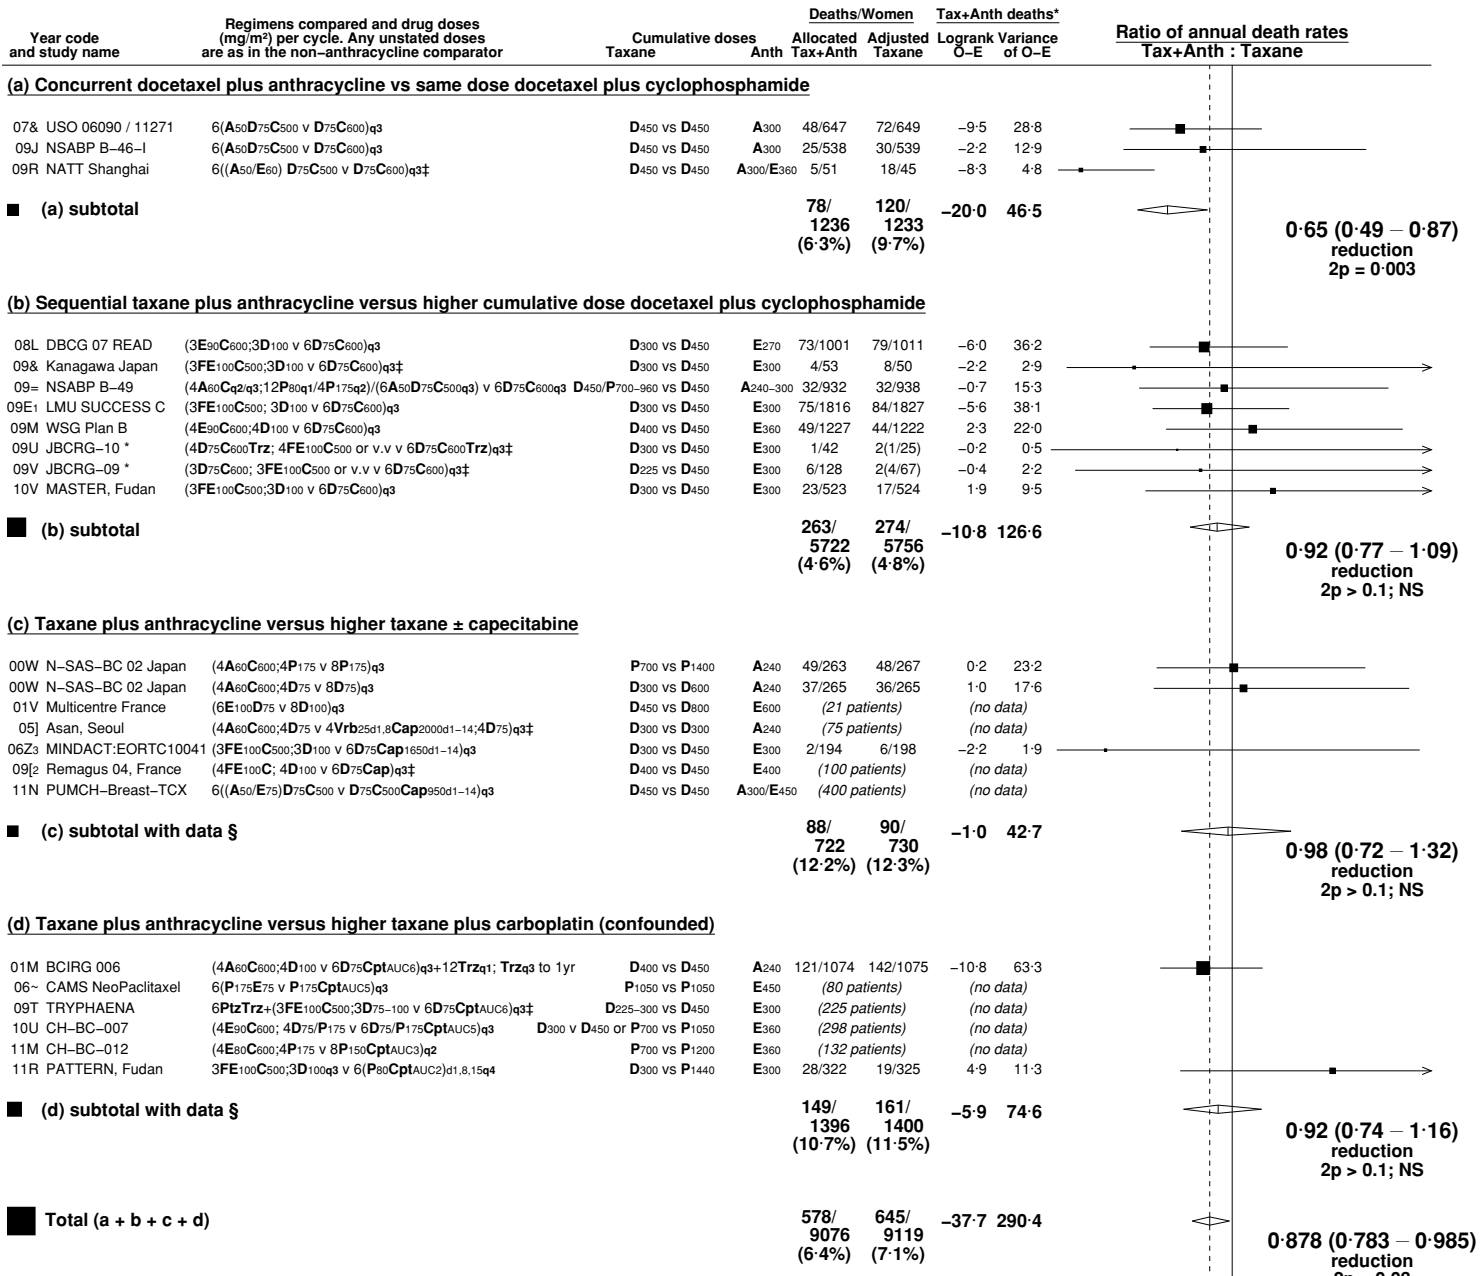

■ 99% or ◊ 95% confidence intervals

Heterogeneity between 4 subtotals:  $\chi^2_3 = 5.2$ ;  $p > 0.1$ ; NS

Heterogeneity within subtotals:  $\chi^2_{12} = 18.6$ ;  $p = 0.10$

Heterogeneity between 16 trials:  $\chi^2_{15} = 23.8$ ;  $p = 0.07$

\* For balance, control patients in 3-way trials or trial strata count half or twice in subtotal(s) and in final total of deaths/patients.

‡ Pre-operative chemotherapy

v.v Vice versa

Taxanes: D = docetaxel; P = paclitaxel

Anthracyclines: A = doxorubicin (Adriamycin); E = epirubicin

Other agents: C = cyclophosphamide; F = fluorouracil; M = methotrexate; Trz = trastuzumab; Vrb = vinorelbine; Cap = capecitabine; Cpt = carboplatin; Ptz = pertuzumab

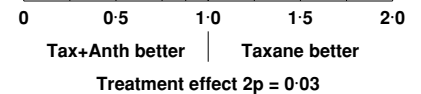

# P11: Death without recurrence in year 0 in trials of taxane plus anthracycline versus taxane without anthracycline

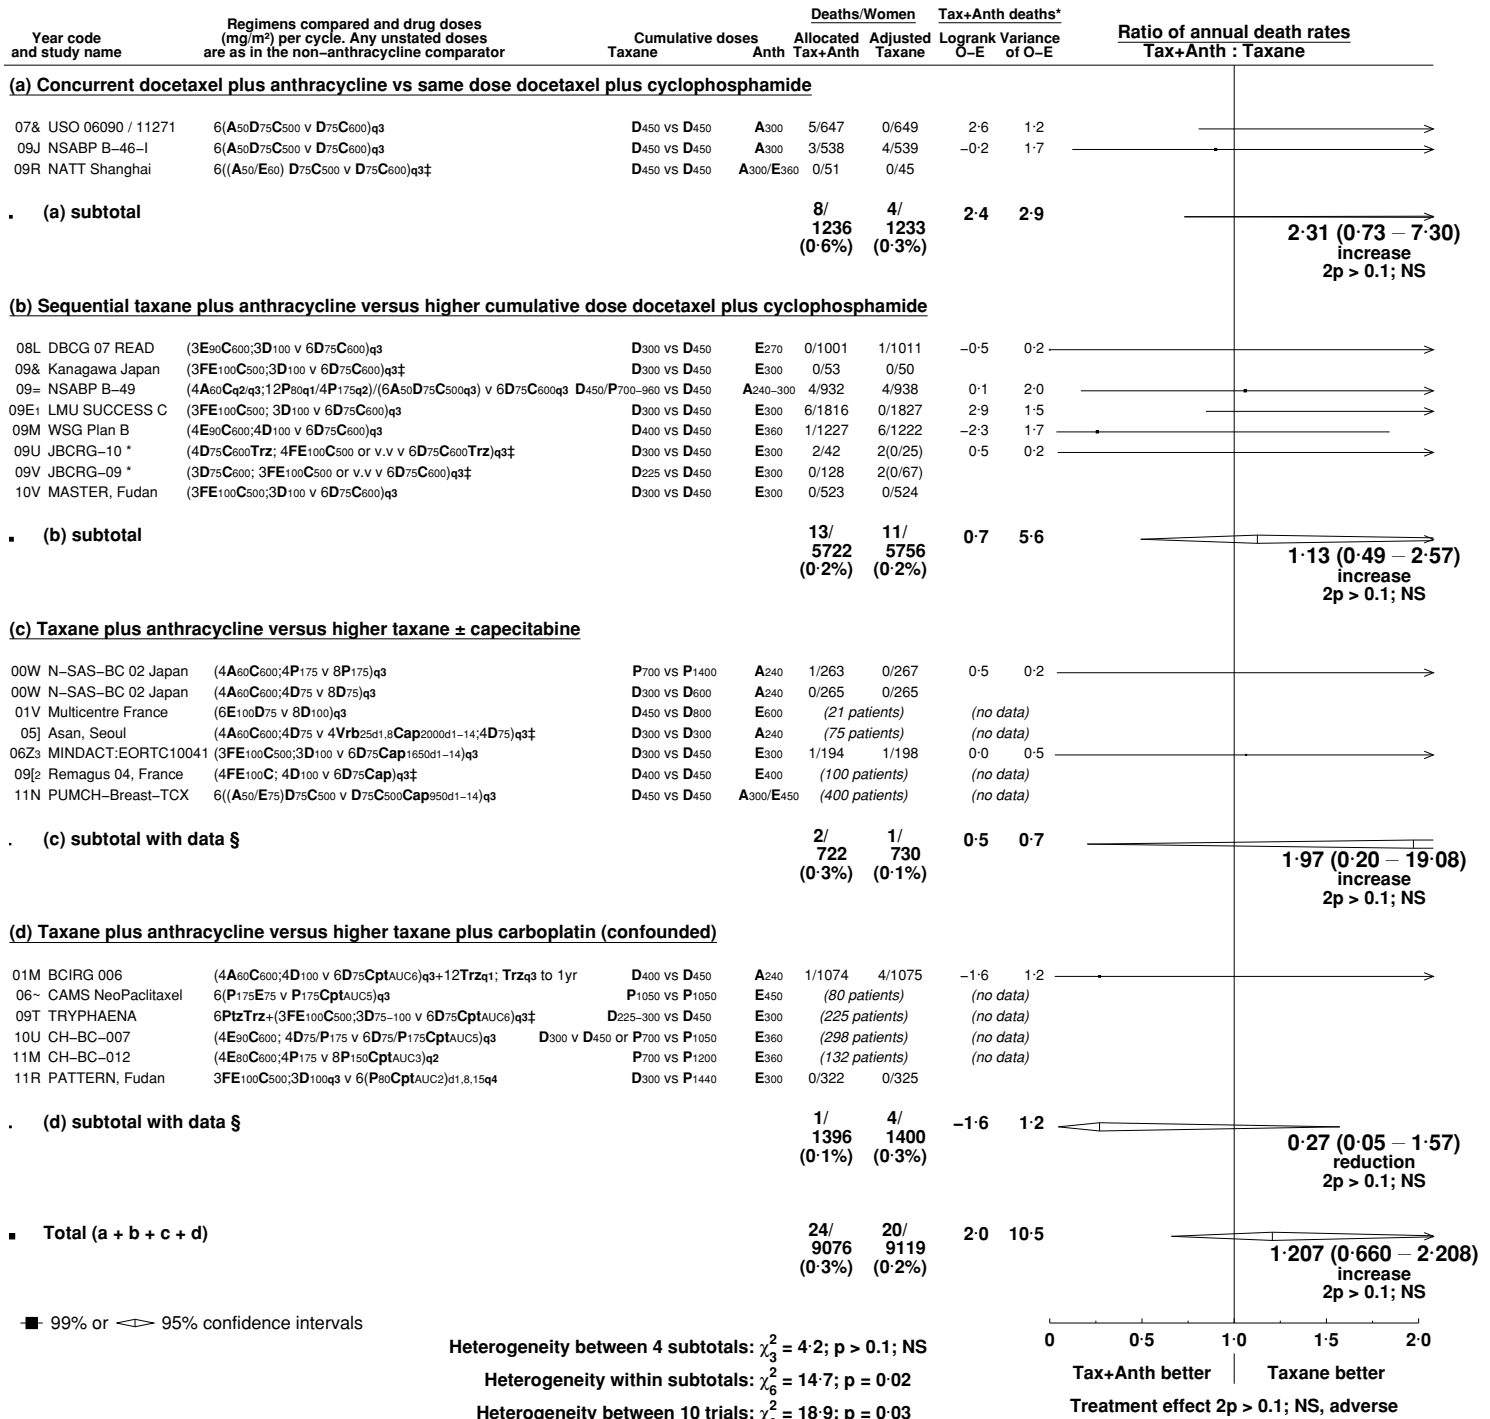

\* For balance, control patients in 3-way trials or trial strata count half or twice in subtotal(s) and in final total of deaths/patients.

‡ Pre-operative chemotherapy

v.v Vice versa

Taxanes: D = docetaxel; P = paclitaxel

Anthracyclines: A = doxorubicin (Adriamycin); E = epirubicin

Other agents: C = cyclophosphamide; F = fluorouracil; M = methotrexate; Trz = trastuzumab; Vrb = vinorelbine; Cap = capecitabine; Cpt = carboplatin; Ptz = pertuzumab

# P12: Death without recurrence in trials of taxane plus anthracycline versus taxane without anthracycline

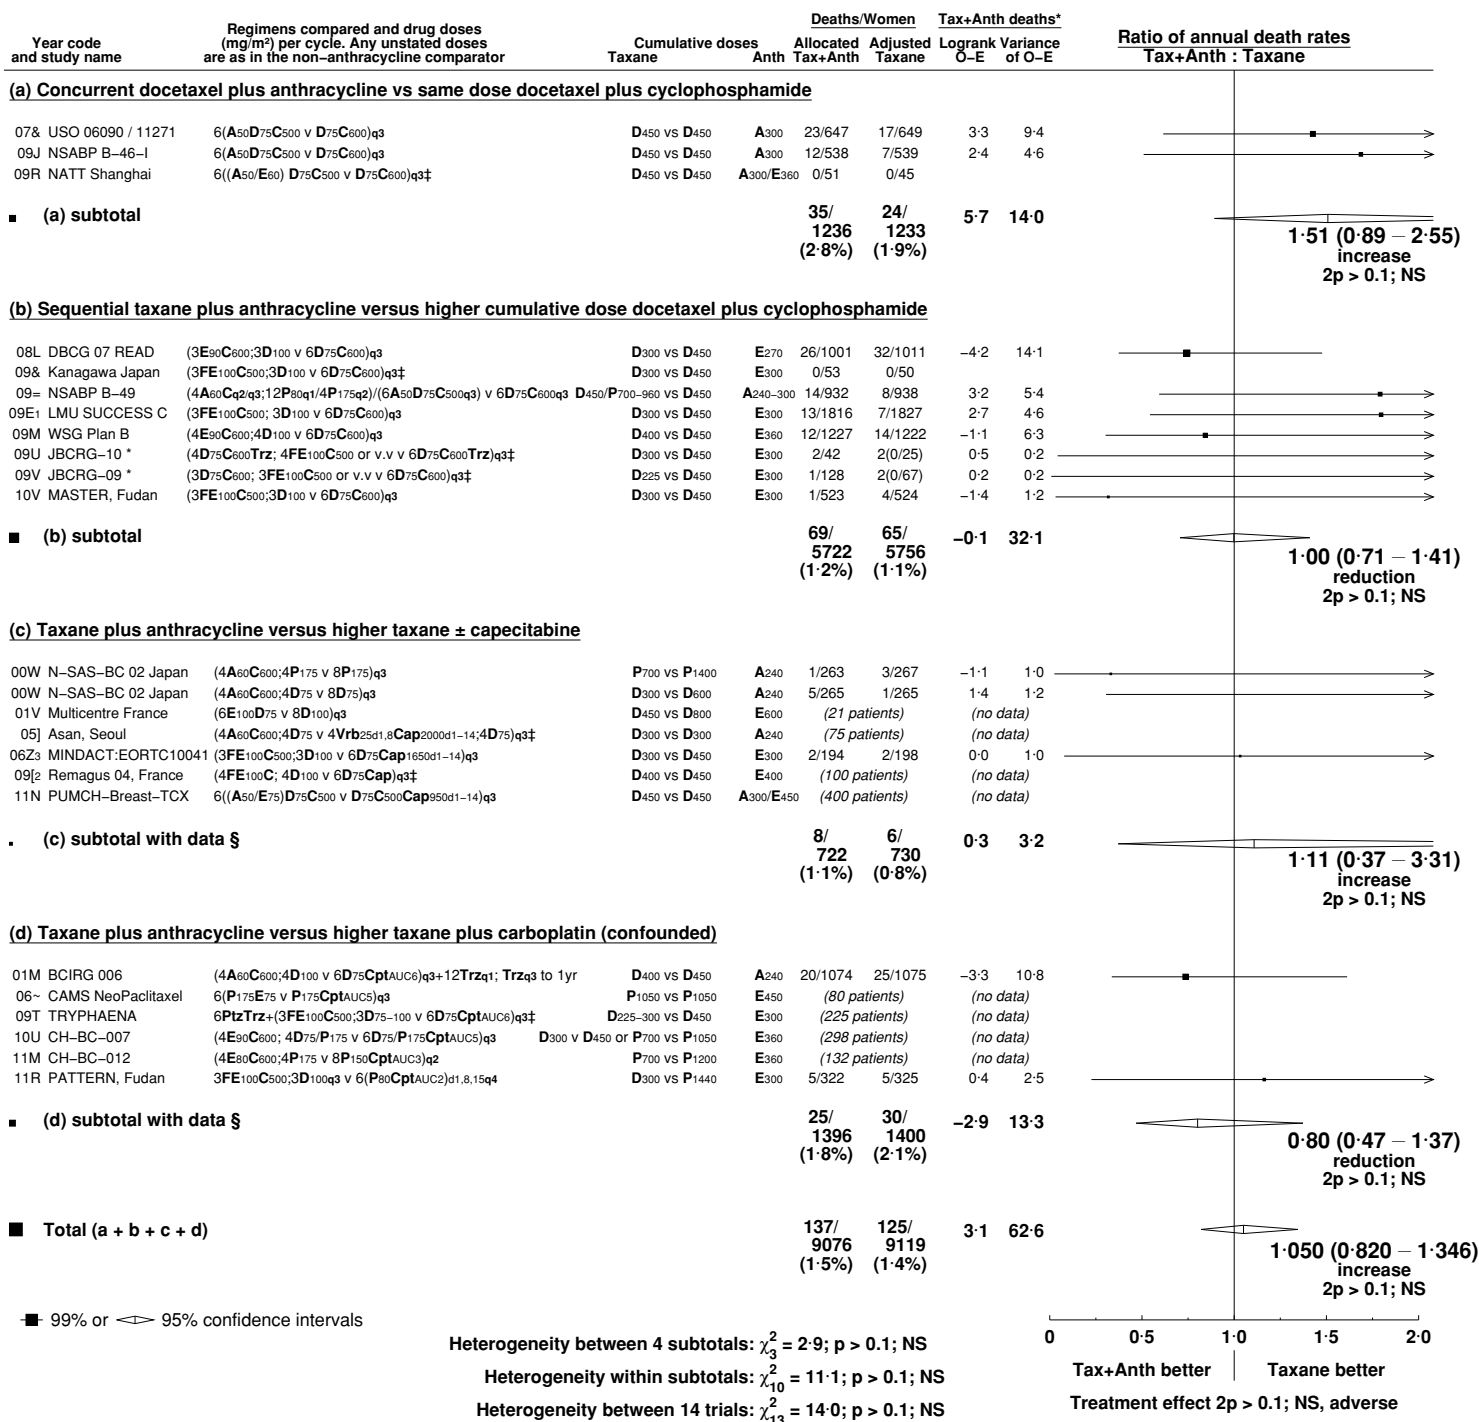

■ 99% or ◊ 95% confidence intervals

Heterogeneity between 4 subtotals:  $\chi^2_3 = 2.9$ ;  $p > 0.1$ ; NS

Heterogeneity within subtotals:  $\chi^2_{10} = 11.1$ ;  $p > 0.1$ ; NS

Heterogeneity between 14 trials:  $\chi^2_{13} = 14.0$ ;  $p > 0.1$ ; NS

\* For balance, control patients in 3-way trials or trial strata count half or twice in subtotal(s) and in final total of deaths/patients.

‡ Pre-operative chemotherapy

v.v Vice versa

Taxanes: D = docetaxel; P = paclitaxel

Anthracyclines: A = doxorubicin (Adriamycin); E = epirubicin

Other agents: C = cyclophosphamide; F = fluorouracil; M = methotrexate; Trz = trastuzumab; Vrb = vinorelbine; Cap = capecitabine; Cpt = carboplatin; Ptz = pertuzumab

# P13: All-cause mortality in trials of taxane plus anthracycline versus taxane without anthracycline

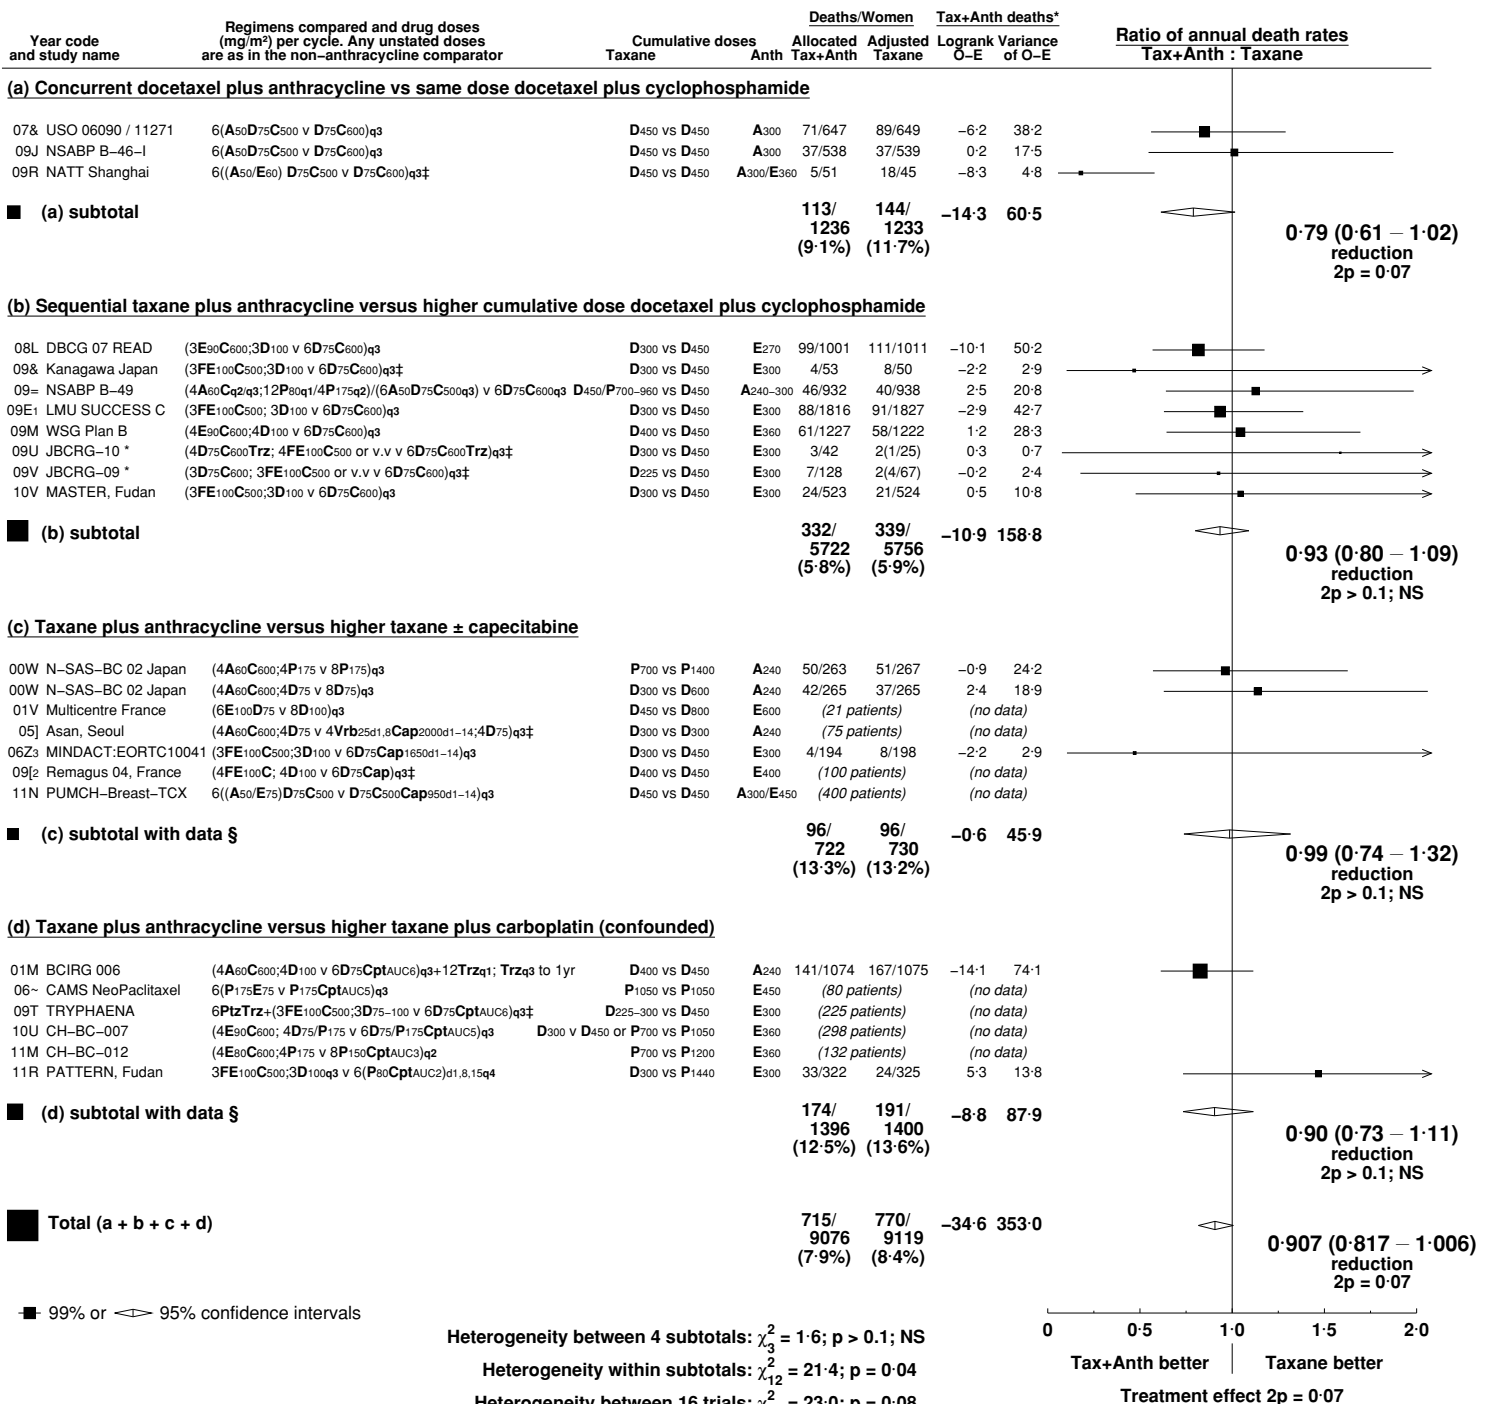

\* For balance, control patients in 3-way trials or trial strata count half or twice in subtotal(s) and in final total of deaths/patients.

‡ Pre-operative chemotherapy  
v.v Vice versa

Taxanes: D = docetaxel; P = paclitaxel

Anthracyclines: A = doxorubicin (Adriamycin); E = epirubicin

Other agents: C = cyclophosphamide; F = fluorouracil; M = methotrexate; Trz = trastuzumab; Vrb = vinorelbine; Cap = capecitabine; Cpt = carboplatin; Ptz = pertuzumab

P14: Subgroup analyses of concurrent anthracycline plus docetaxel plus cyclophosphamide versus same dose docetaxel plus cyclophosphamide; distant recurrence at any time

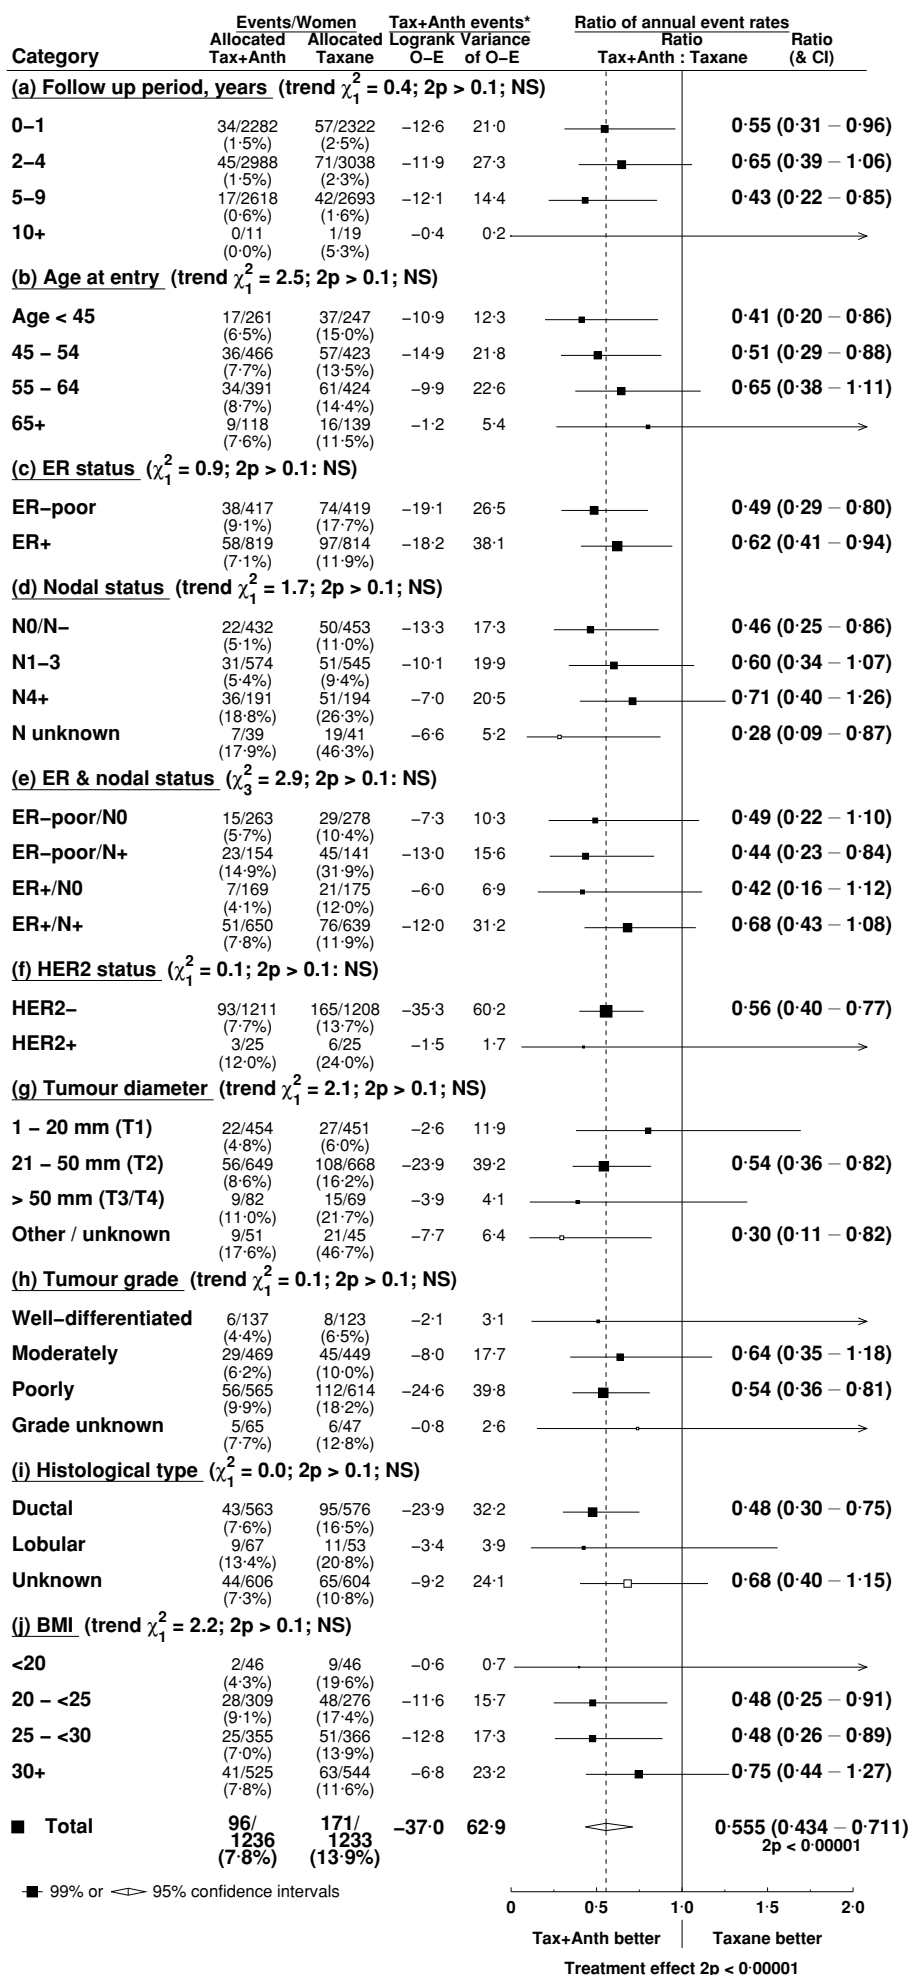

P15: Subgroup analyses of concurrent anthracycline plus docetaxel plus cyclophosphamide versus same dose docetaxel plus cyclophosphamide; breast cancer mortality

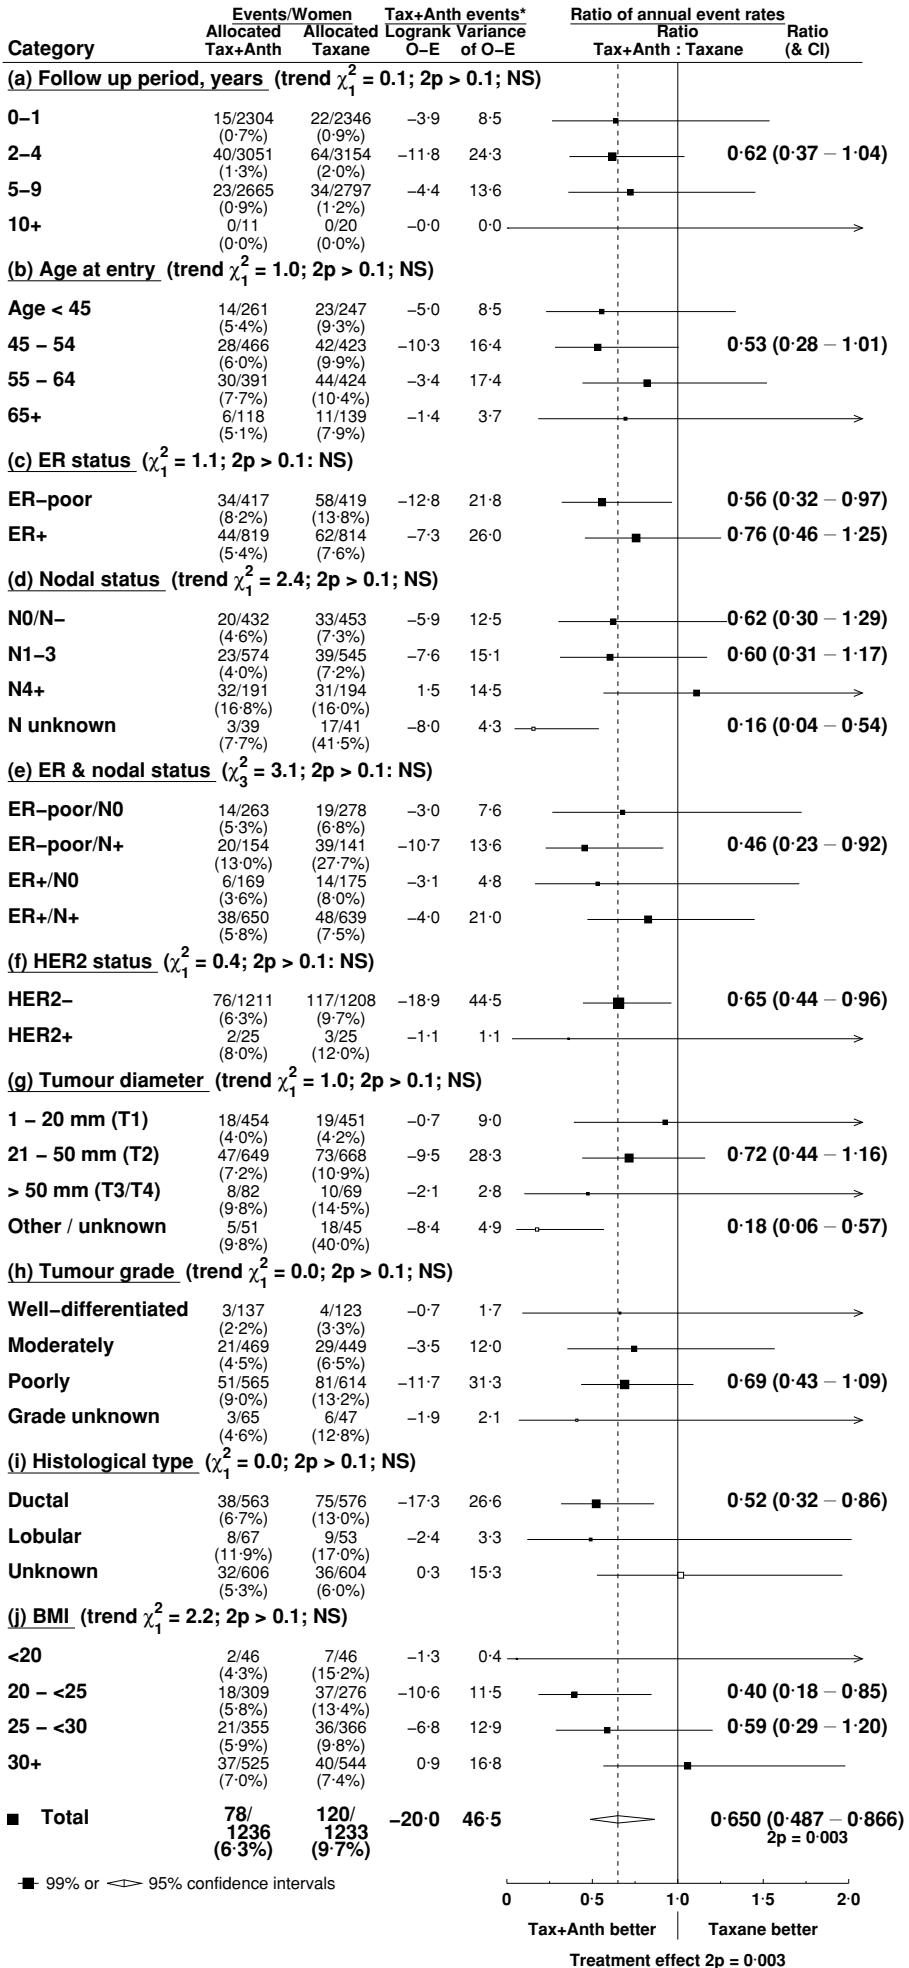

P16: Subgroup analyses of taxane plus anthracycline versus taxane without anthracycline; any recurrence. All trial comparisons (a)-(d).

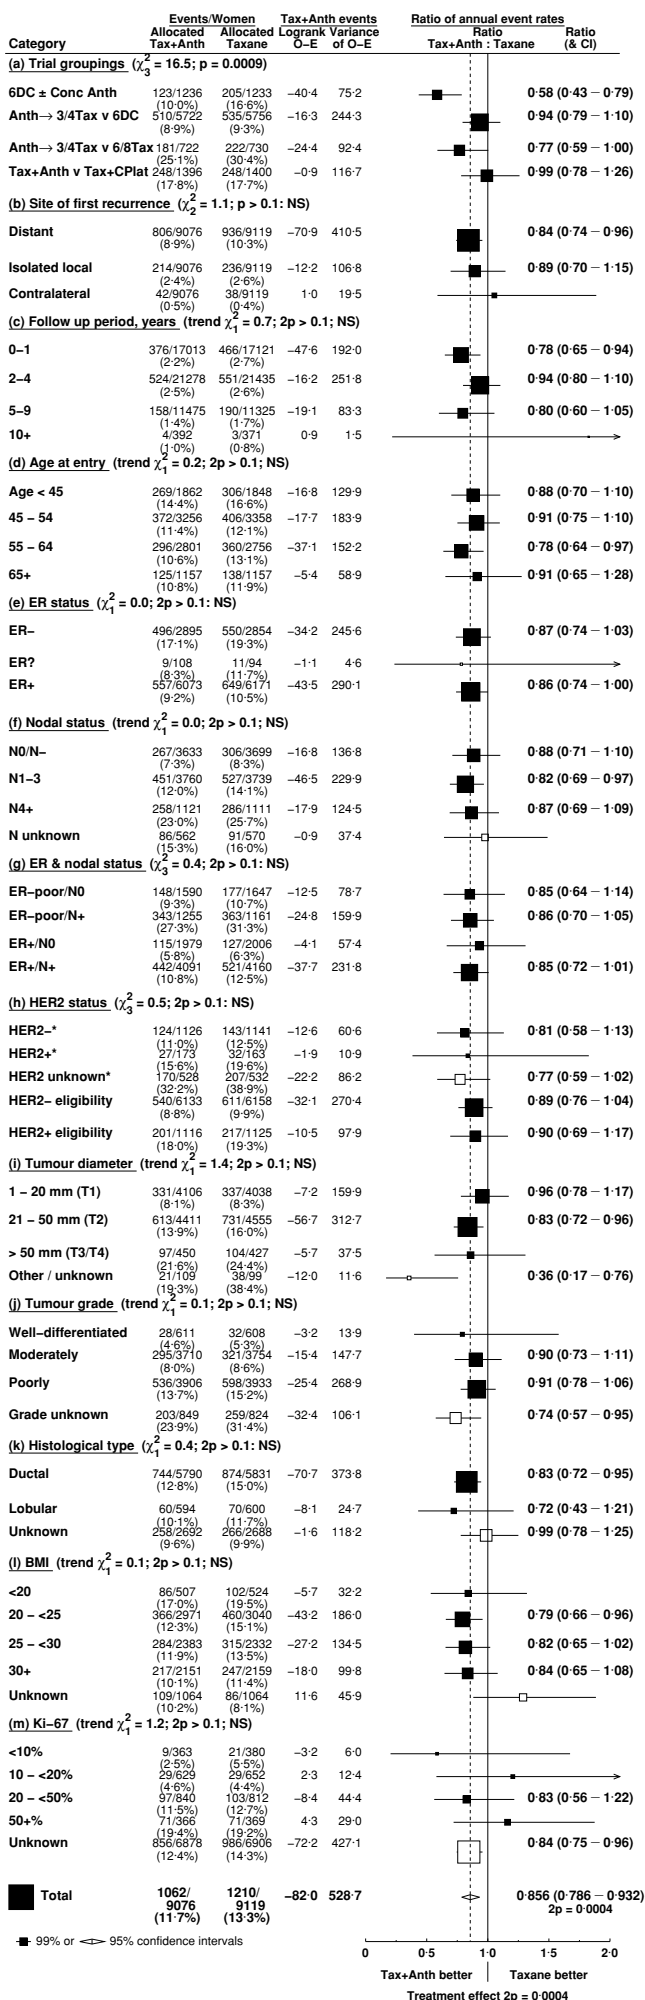

\*Trials which randomised both HER2 negative and positive tumours shown separately to those trials which had HER2 negative only or positive only eligibility criteria.



P17: Subgroup analyses of taxane plus anthracycline versus taxane without anthracycline; distant recurrence at any time. All trial comparisons (a)-(d).

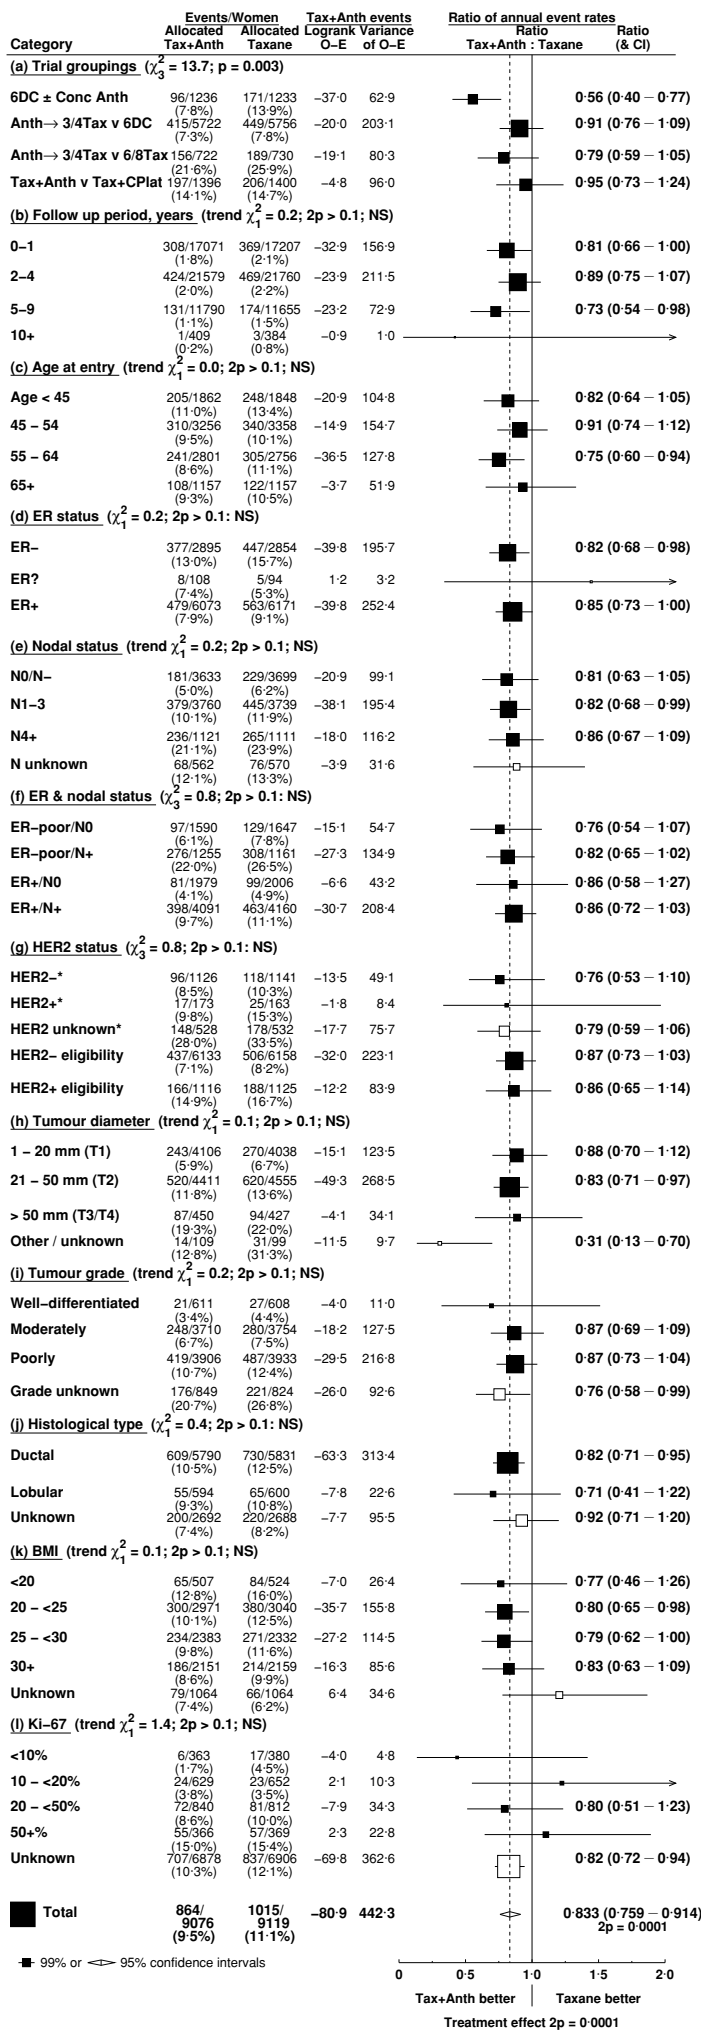

\*Trials which randomised both HER2 negative and positive tumours shown separately to those trials which had HER2 negative only or positive only eligibility criteria.

P18: Subgroup analyses of taxane plus anthracycline versus taxane without anthracycline; breast cancer mortality. All trial comparisons (a)-(d).

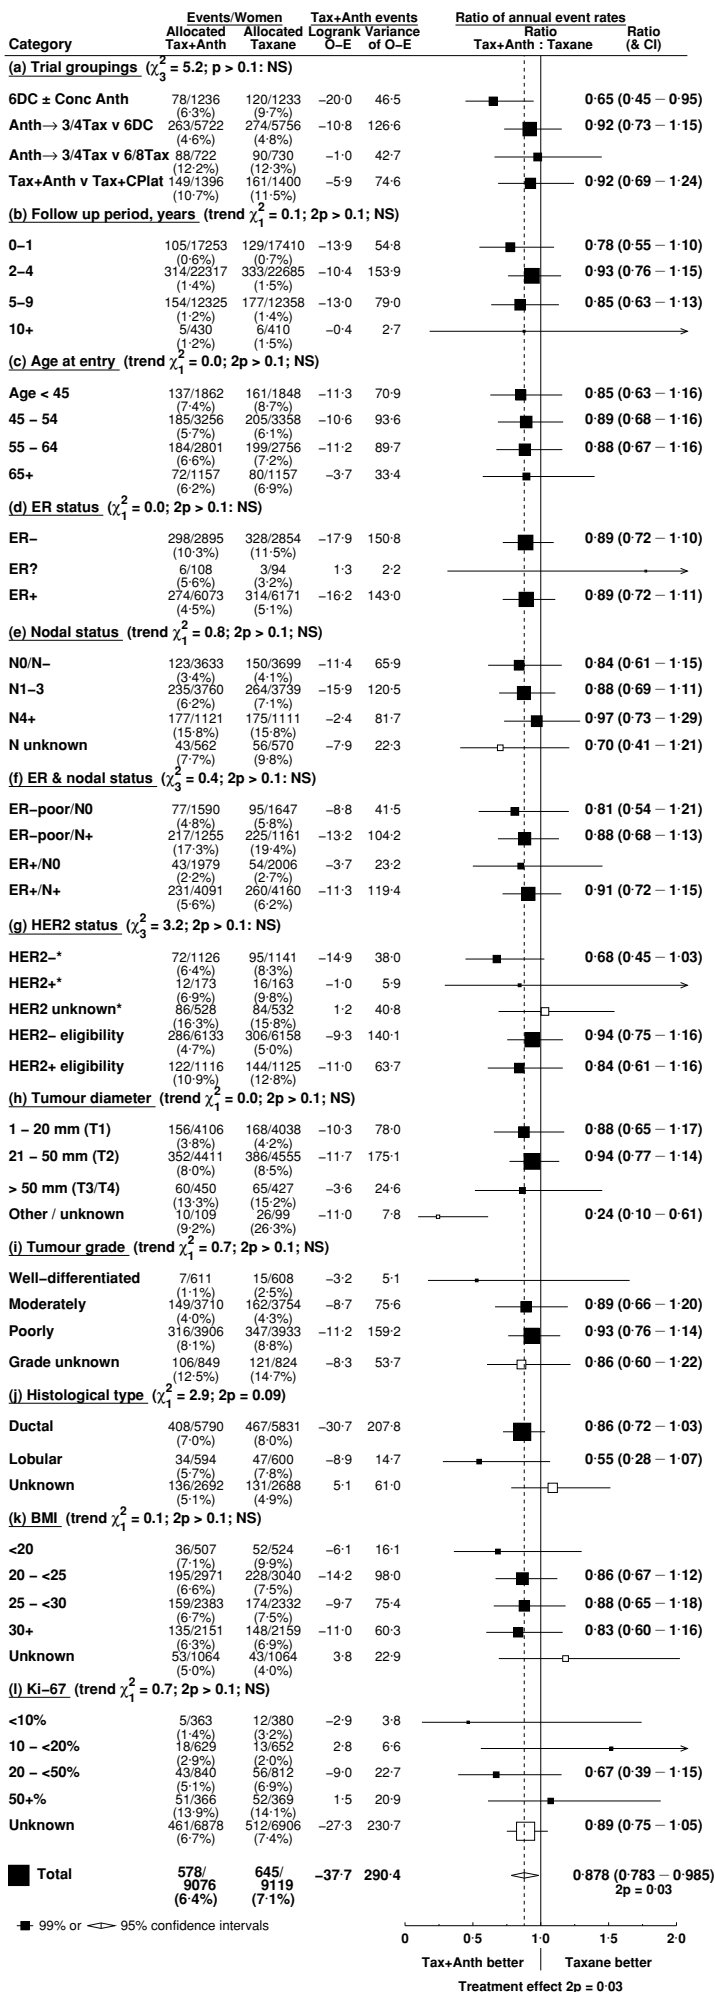

\*Trials which randomised both HER2 negative and positive tumours shown separately to those trials which had HER2 negative only or positive only eligibility criteria.

P 19: 5-year risk of recurrence split by tumour size in trials of taxane plus anthracycline versus taxane without anthracycline. All trial comparisons (a)-(d).

### 1–20 mm (T1)

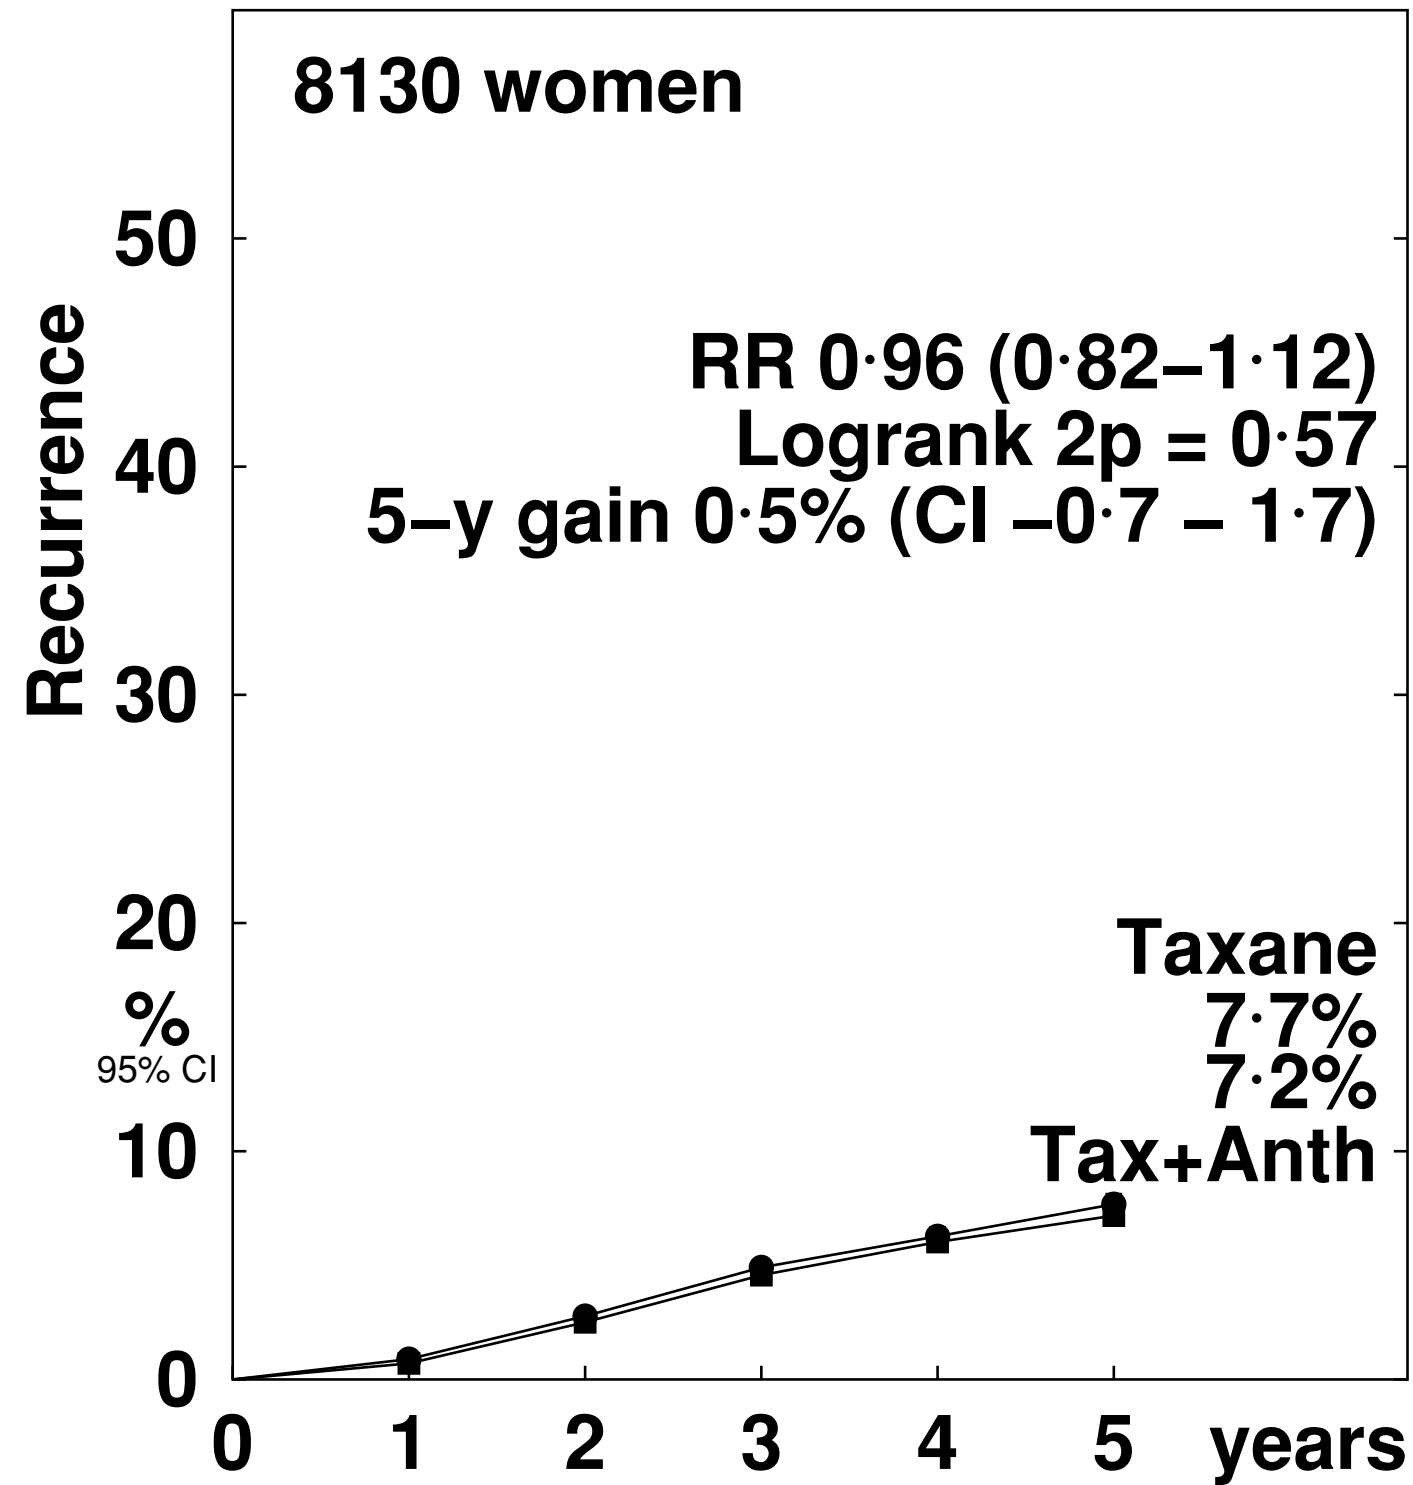

Recurrence rates (% / year) and logrank analyses

| Allocation                                                 | Years 0 – 1       | Years 2 – 4        | Year 5+          |
|------------------------------------------------------------|-------------------|--------------------|------------------|
| Tax+Anth                                                   | 1.28 (100 / 7802) | 1.68 (169 / 10075) | 1.10 (62 / 5660) |
| Taxane                                                     | 1.38 (106 / 7681) | 1.73 (173 / 9989)  | 1.05 (58 / 5535) |
| Rate ratio, from 0.90 CI 0.68 – 1.19 (O–E) / V –5.2 / 49.0 |                   |                    |                  |
| 0.95 CI 0.77 – 1.19 –3.8 / 81.9                            |                   |                    |                  |
| 1.06 CI 0.74 – 1.53 1.8 / 28.9                             |                   |                    |                  |

### Entry age 21–50 mm (T2)

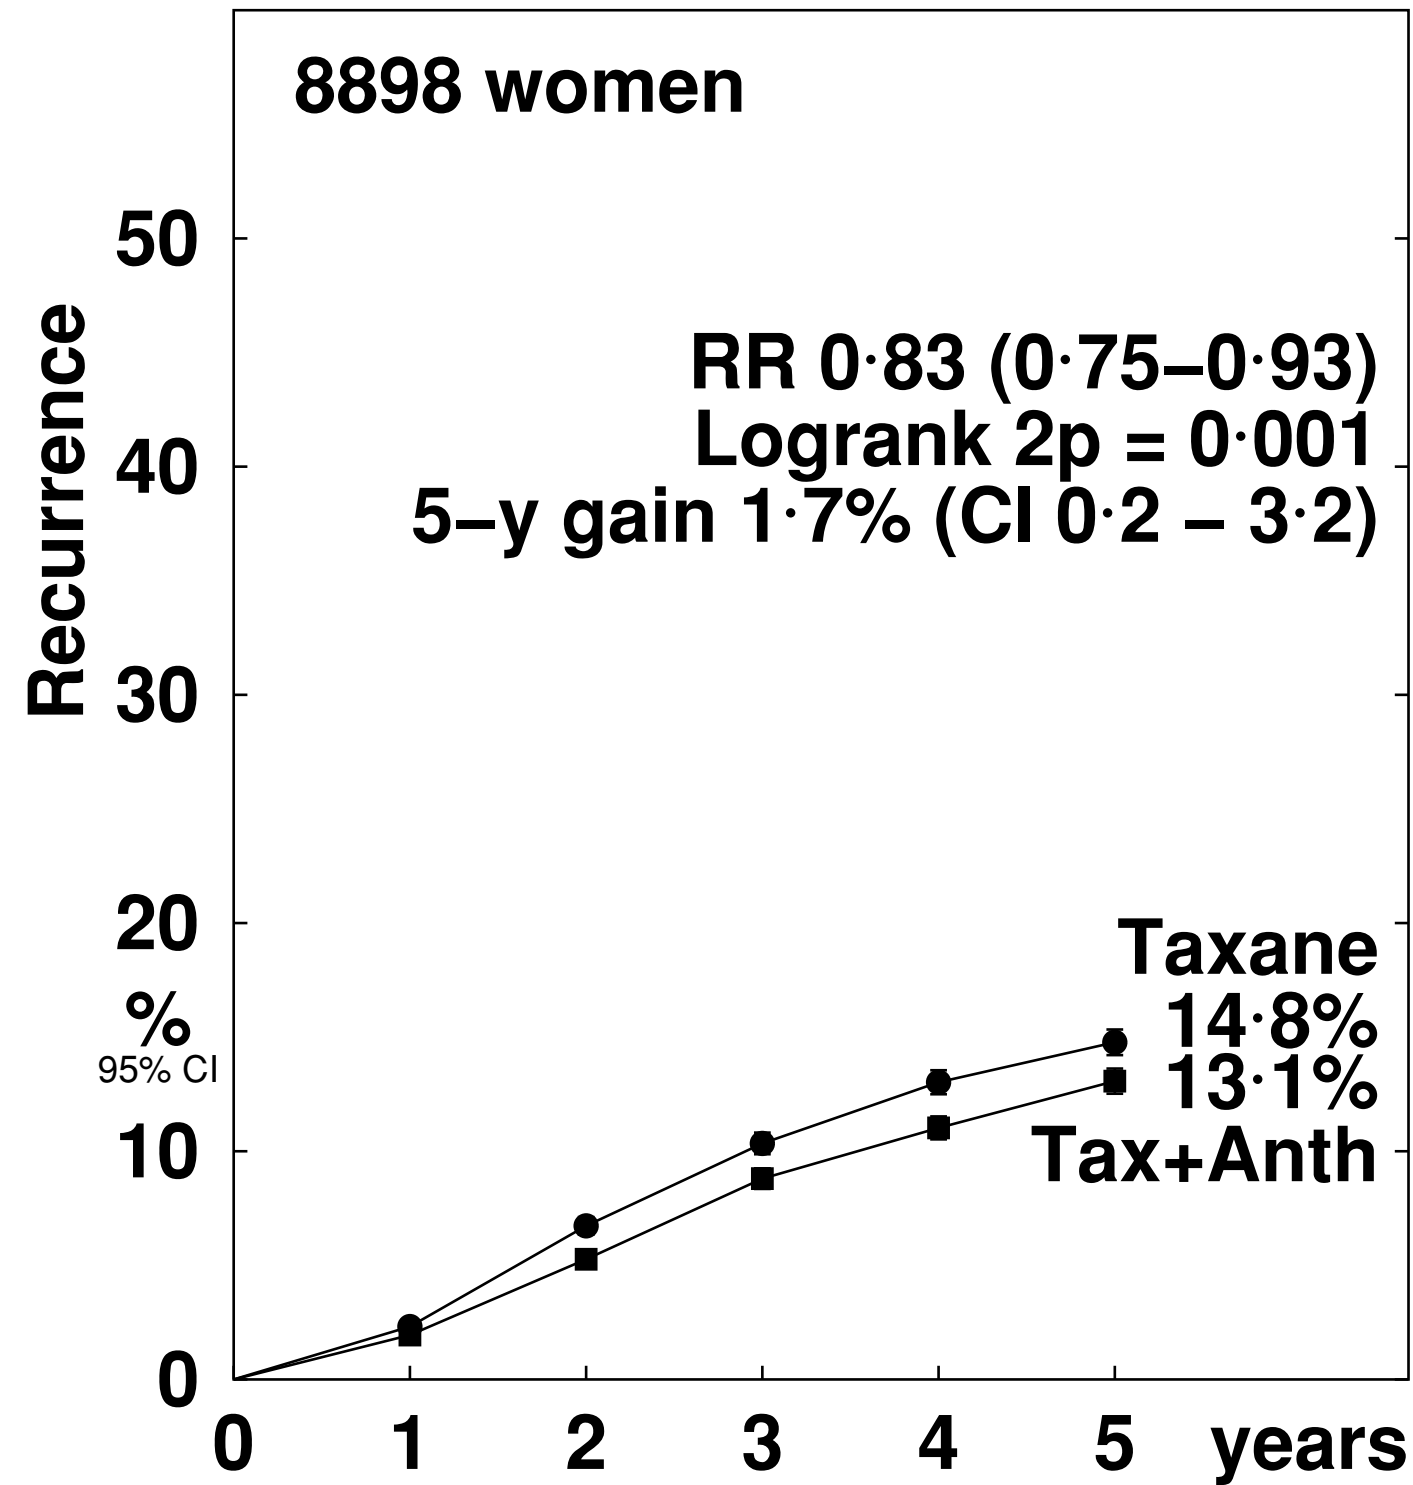

Recurrence rates (% / year) and logrank analyses

| Allocation                                                   | Years 0 – 1       | Years 2 – 4        | Year 5+           |
|--------------------------------------------------------------|-------------------|--------------------|-------------------|
| Tax+Anth                                                     | 2.73 (226 / 8274) | 2.96 (301 / 10155) | 1.48 (86 / 5797)  |
| Taxane                                                       | 3.40 (286 / 8419) | 3.03 (313 / 10316) | 2.10 (122 / 5806) |
| Rate ratio, from 0.78 CI 0.65 – 0.93 (O–E) / V –29.9 / 117.9 |                   |                    |                   |
| 0.95 CI 0.80 – 1.11 –7.9 / 145.3                             |                   |                    |                   |
| 0.68 CI 0.52 – 0.90 –18.8 / 49.5                             |                   |                    |                   |

### > 50 mm (T3/T4)

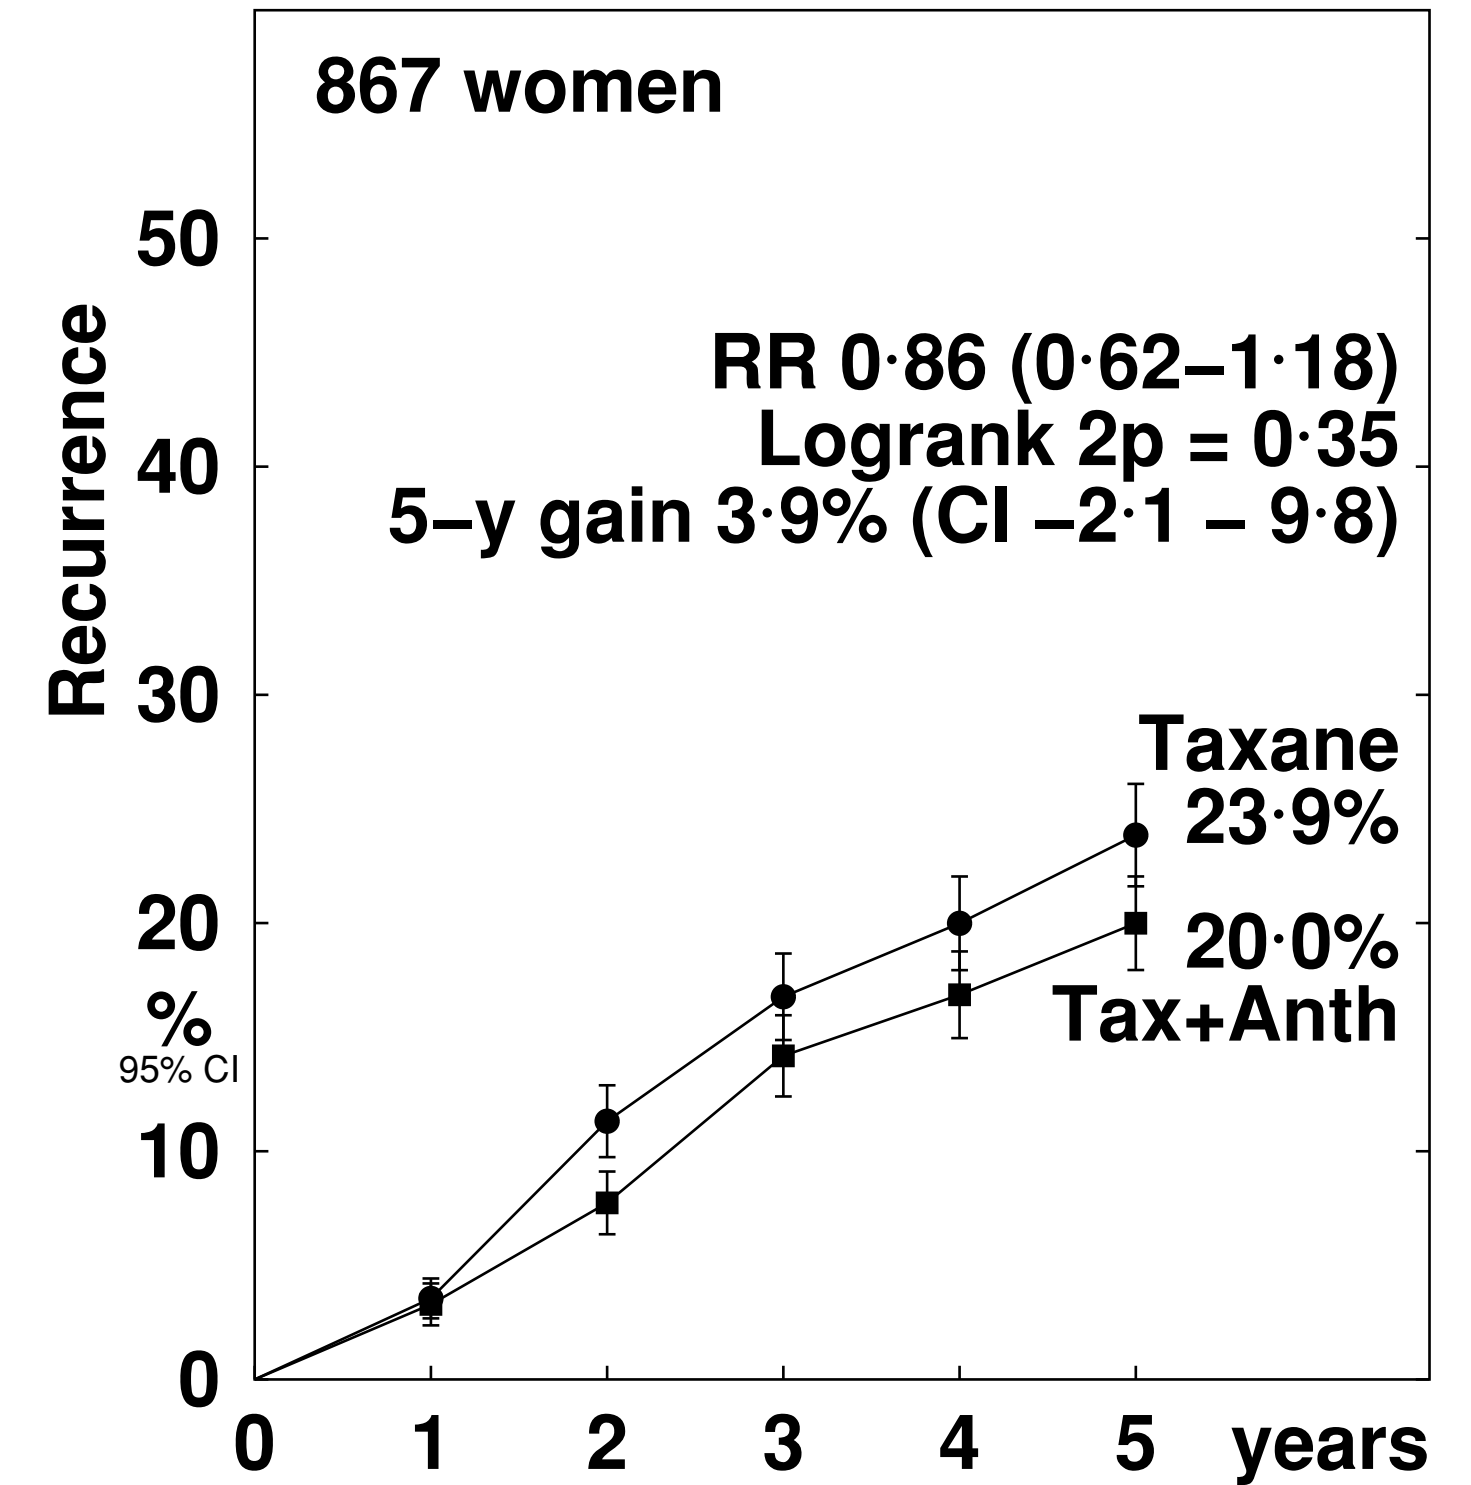

Recurrence rates (% / year) and logrank analyses

| Allocation                                                 | Years 0 – 1     | Years 2 – 4     | Year 5+         |
|------------------------------------------------------------|-----------------|-----------------|-----------------|
| Tax+Anth                                                   | 4.34 (36 / 829) | 4.74 (47 / 992) | 2.68 (14 / 523) |
| Taxane                                                     | 5.61 (44 / 784) | 5.30 (48 / 906) | 2.53 (11 / 434) |
| Rate ratio, from 0.66 CI 0.39 – 1.09 (O–E) / V –6.2 / 14.8 |                 |                 |                 |
| 0.93 CI 0.59 – 1.48 –1.3 / 18.0                            |                 |                 |                 |
| 1.47 CI 0.59 – 3.65 1.8 / 4.7                              |                 |                 |                 |

P 20: 5-year risk of recurrence split by tumour grade in trials of taxane plus anthracycline versus taxane without anthracycline. All trial comparisons (a)-(d).

### Well-differentiated

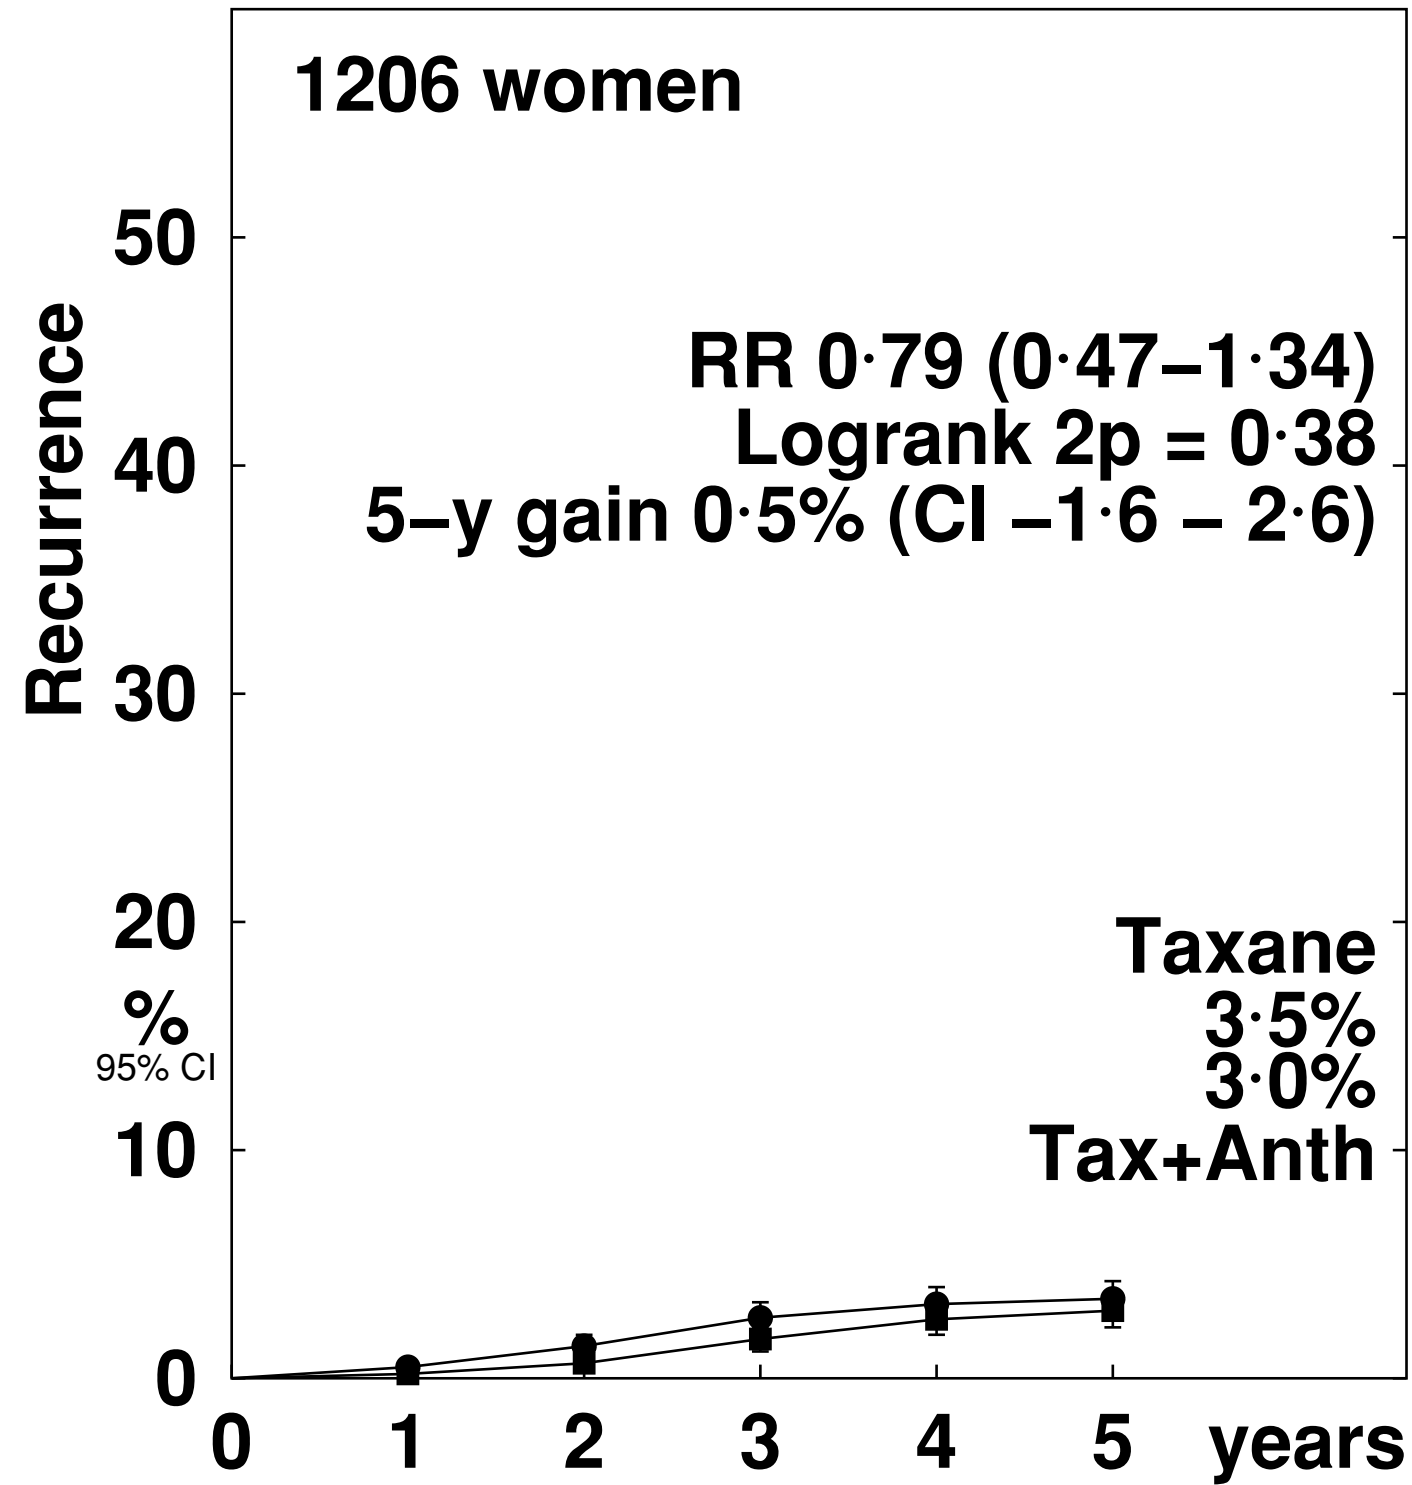

Recurrence rates (% / year) and logrank analyses

| Allocation                 | Years 0 – 1                       | Years 2 – 4                      | Year 5+                           |
|----------------------------|-----------------------------------|----------------------------------|-----------------------------------|
| Tax+Anth                   | 0.34 (4 / 1169)                   | 0.82 (13 / 1581)                 | 1.05 (11 / 1044)                  |
| Taxane                     | 0.70 (8 / 1141)                   | 0.71 (11 / 1544)                 | 1.24 (13 / 1045)                  |
| Rate ratio, from (O-E) / V | 0.48 CI 0.15 – 1.52<br>–2.1 / 2.9 | 1.10 CI 0.48 – 2.51<br>0.5 / 5.6 | 0.73 CI 0.31 – 1.71<br>–1.7 / 5.3 |

### Moderately

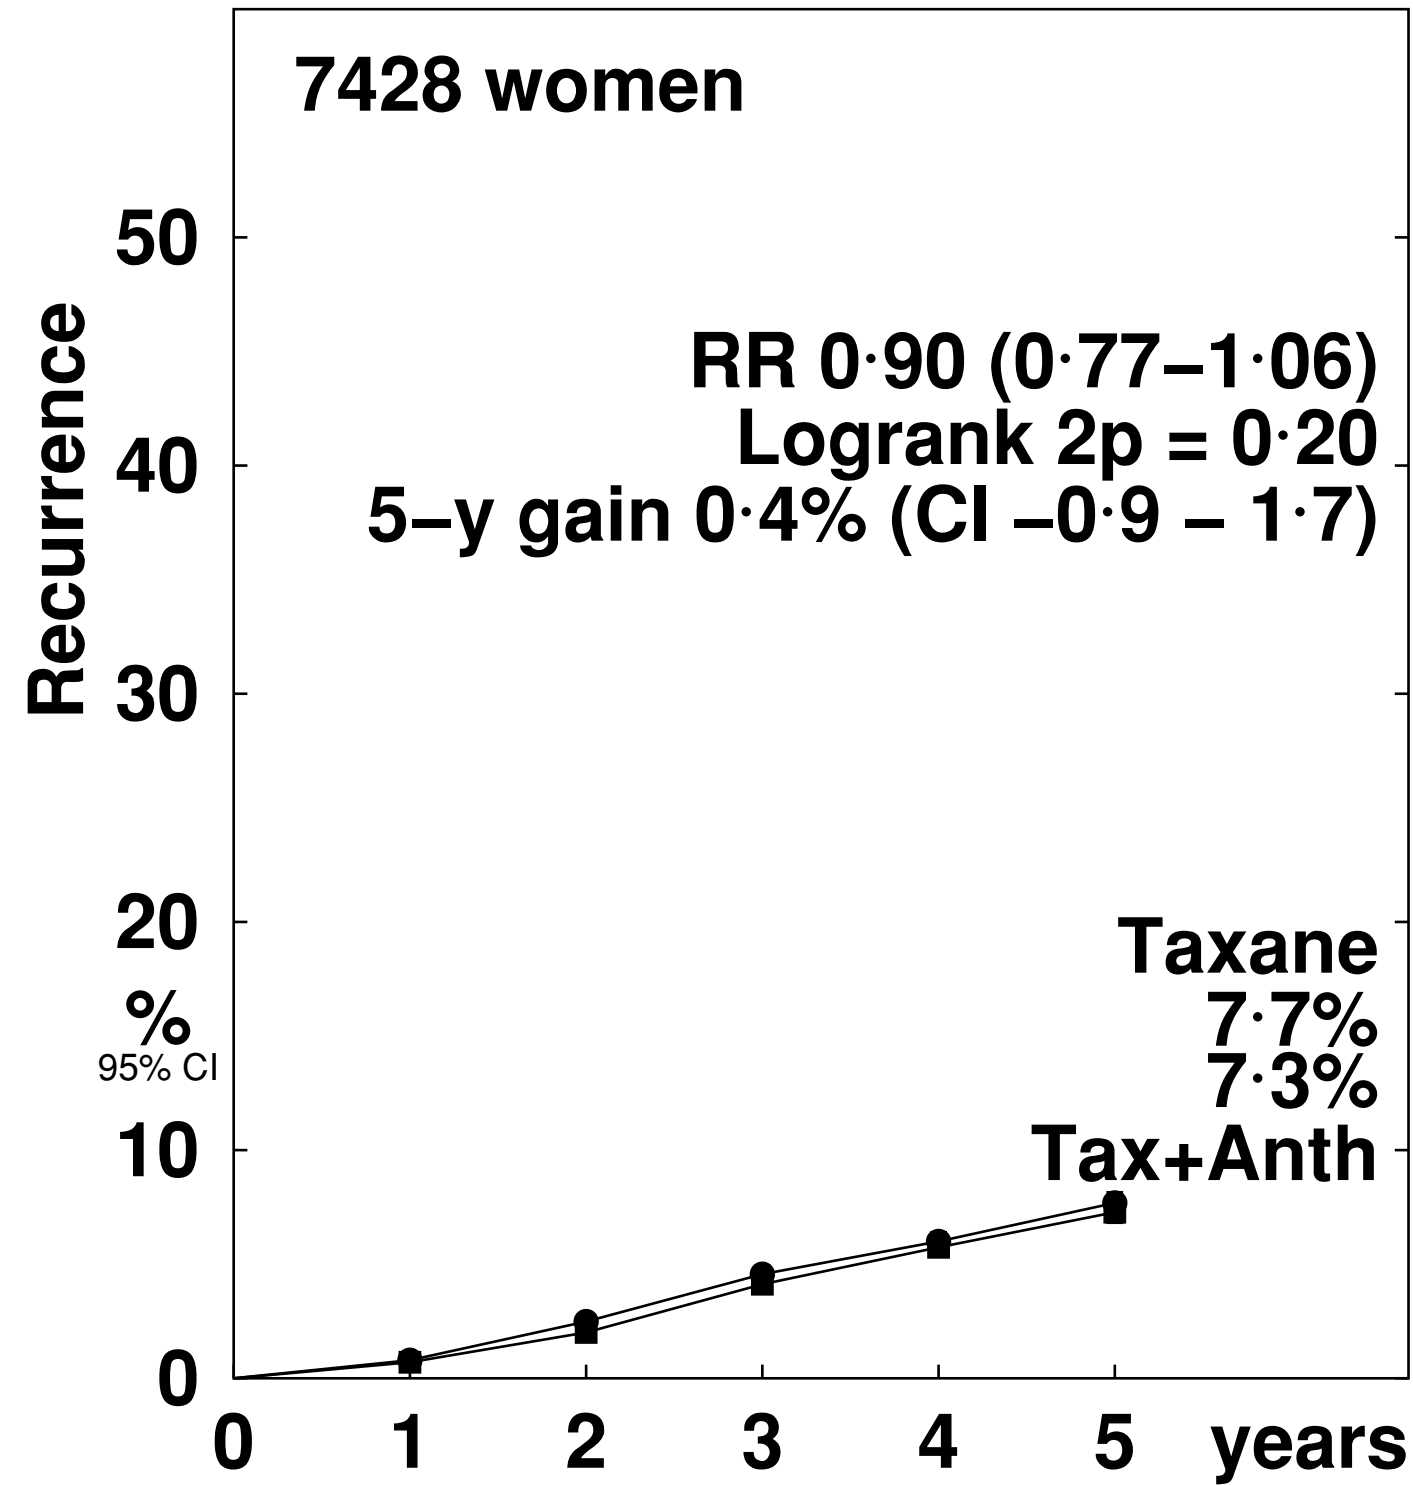

Recurrence rates (% / year) and logrank analyses

| Allocation                 | Years 0 – 1                        | Years 2 – 4                       | Year 5+                            |
|----------------------------|------------------------------------|-----------------------------------|------------------------------------|
| Tax+Anth                   | 1.04 (73 / 7053)                   | 1.88 (170 / 9063)                 | 1.16 (52 / 4491)                   |
| Taxane                     | 1.23 (87 / 7098)                   | 1.82 (166 / 9134)                 | 1.48 (64 / 4315)                   |
| Rate ratio, from (O-E) / V | 0.81 CI 0.59 – 1.11<br>–8.3 / 38.4 | 1.01 CI 0.82 – 1.26<br>1.1 / 81.0 | 0.75 CI 0.52 – 1.08<br>–8.3 / 28.3 |

### Poorly

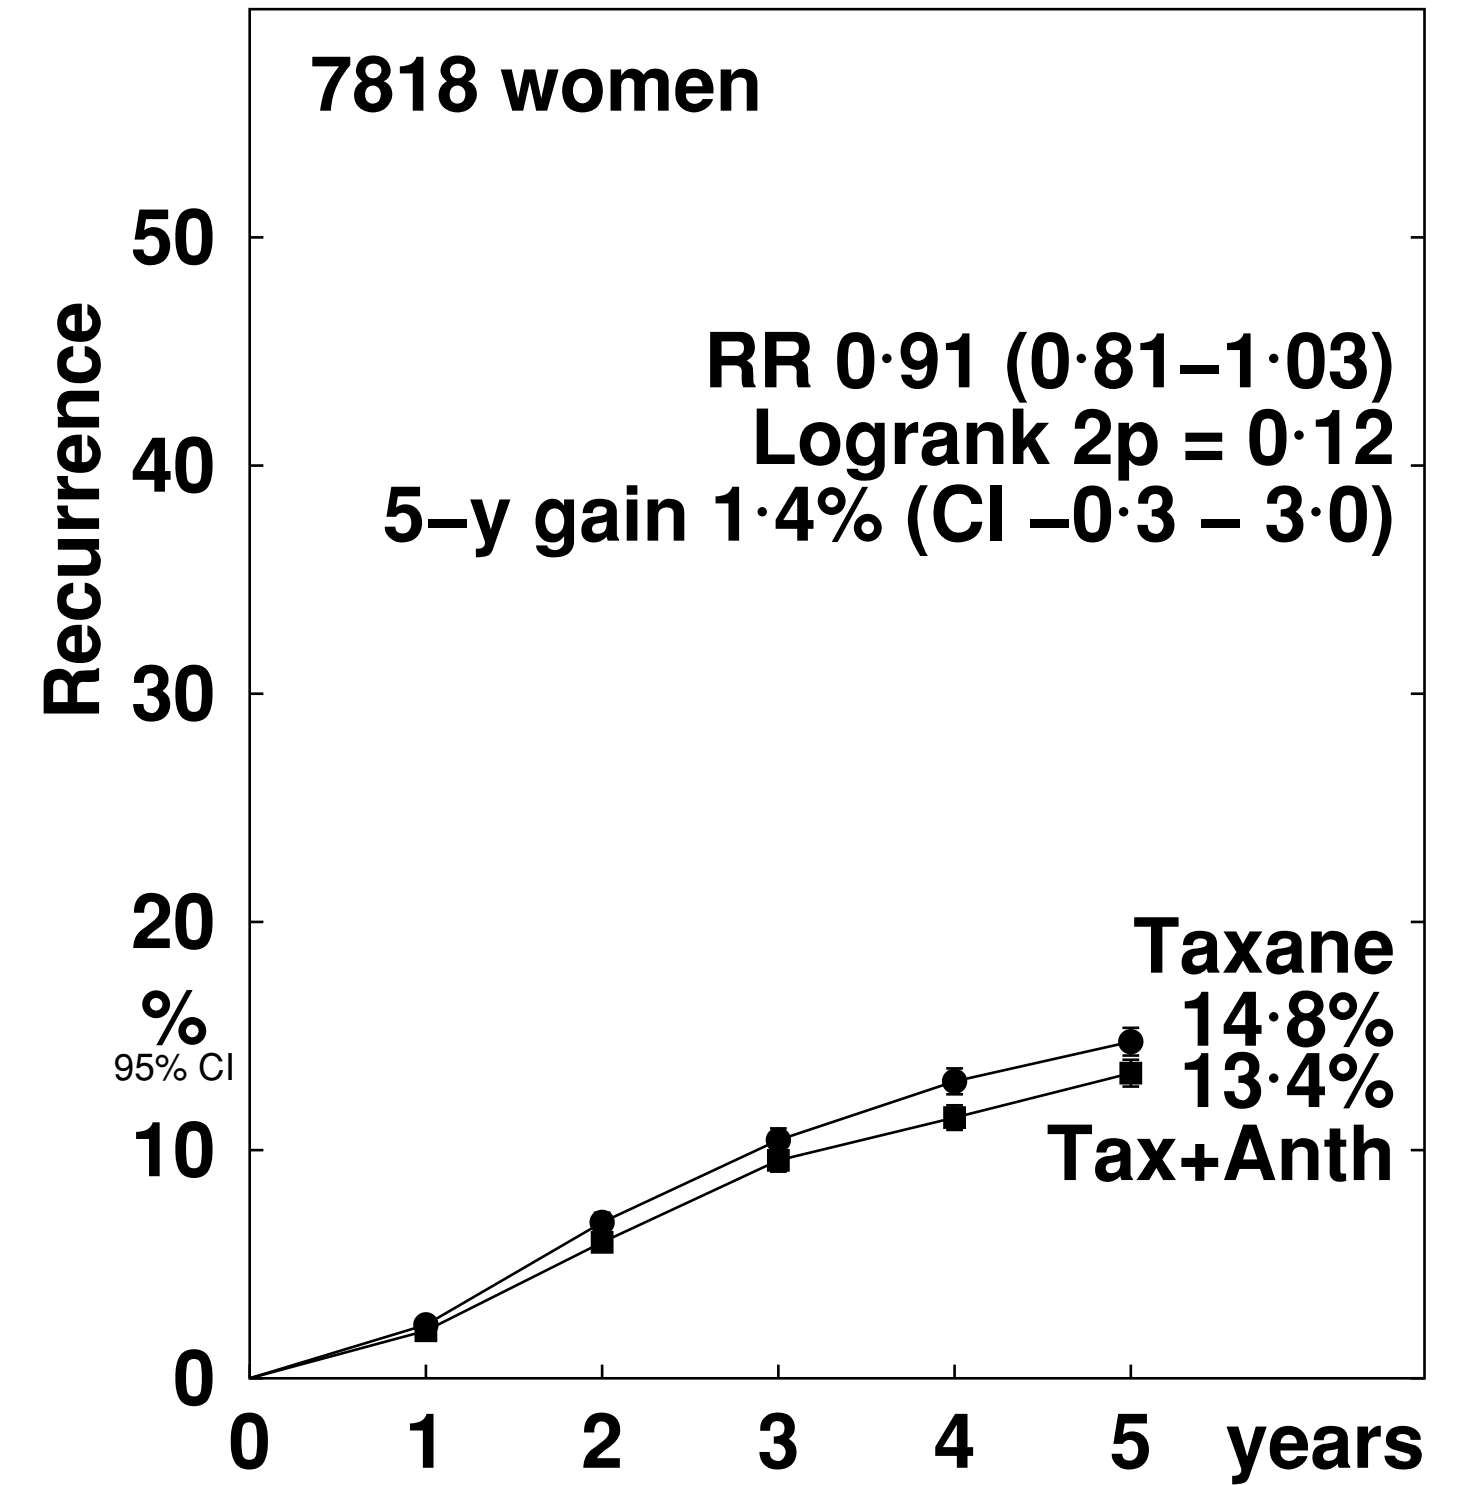

Recurrence rates (% / year) and logrank analyses

| Allocation                 | Years 0 – 1                          | Years 2 – 4                          | Year 5+                           |
|----------------------------|--------------------------------------|--------------------------------------|-----------------------------------|
| Tax+Anth                   | 3.04 (221 / 7277)                    | 2.80 (247 / 8817)                    | 1.35 (68 / 5043)                  |
| Taxane                     | 3.51 (257 / 7315)                    | 3.04 (271 / 8926)                    | 1.30 (67 / 5154)                  |
| Rate ratio, from (O-E) / V | 0.87 CI 0.72 – 1.04<br>–16.1 / 111.9 | 0.92 CI 0.77 – 1.10<br>–10.5 / 124.3 | 1.04 CI 0.74 – 1.46<br>1.1 / 32.8 |

## P21: Mortality by cause and incidence of second cancers. All trial comparisons (a)-(d).

|                                                             | Events               | (O-E)              | Variance | Rate Ratio | 95% CI | p           |      |
|-------------------------------------------------------------|----------------------|--------------------|----------|------------|--------|-------------|------|
|                                                             | Tax+Anth<br>(n=9076) | Taxane<br>(n=9169) |          |            |        |             |      |
| Death without recurrence                                    | 137                  | 125                | 3.1      | 62.6       | 1.05   | 0.82 - 1.35 | 0.70 |
| Death with recurrence                                       | 578                  | 645                | -37.7    | 290.4      | 0.88   | 0.78 - 0.99 | 0.03 |
| Any death                                                   | 715                  | 770                | -34.6    | 353.0      | 0.91   | 0.82 - 1.01 | 0.07 |
| <b>Death without recurrence (selected groups of causes)</b> |                      |                    |          |            |        |             |      |
| <b>Vascular disease:</b>                                    | 30                   | 20                 | 4.6      | 12.1       | 1.46   | 0.83 - 2.57 | 0.19 |
| Stroke                                                      | 8                    | 6                  | 1.0      | 3.5        | 1.33   | 0.47 - 3.79 | 0.59 |
| Pulmonary embolus                                           | 2                    | 1                  | 0.5      | 0.7        | 2.04   | 0.20 - 21.3 | 0.55 |
| Heart & other vascular                                      | 20                   | 13                 | 3.1      | 7.9        | 1.48   | 0.74 - 2.97 | 0.27 |
| <b>Other primary cancer:</b>                                | 34                   | 29                 | 0.4      | 14.7       | 1.03   | 0.62 - 1.71 | 0.92 |
| Acute myeloid leukaemia                                     | 4                    | 2                  | 1.0      | 1.5        | 1.93   | 0.39 - 9.57 | 0.42 |
| Lung                                                        | 5                    | 7                  | -0.9     | 3.0        | 0.74   | 0.24 - 2.30 | 0.60 |
| Other cancer                                                | 25                   | 20                 | 0.3      | 10.3       | 1.03   | 0.56 - 1.90 | 0.93 |
| Other specified cause                                       | 30                   | 36                 | -2.9     | 15.8       | 0.83   | 0.51 - 1.36 | 0.47 |
| Unknown cause                                               | 43                   | 40                 | 1.0      | 20.1       | 1.05   | 0.68 - 1.63 | 0.82 |
| <b>Death without recurrence</b>                             |                      |                    |          |            |        |             |      |
| By entry age (years) %/woman-years                          |                      |                    |          |            |        |             |      |
| <55                                                         | 0.16 (47/29125)      | 0.12 (36/29615)    | 6.4      | 20.5       | 1.37   | 0.89 - 2.11 | 0.16 |
| 55 - 69                                                     | 0.35 (70/19832)      | 0.39 (75/19358)    | -4.3     | 35.5       | 0.89   | 0.64 - 1.23 | 0.47 |
| ≥70                                                         | 1.39 (20/1439)       | 0.92 (14/1525)     | 1.0      | 6.6        | 1.16   | 0.54 - 2.50 | 0.70 |
| All ages                                                    | 0.27 (137/50396)     | 0.25 (125/50498)   | 3.1      | 62.6       | 1.05   | 0.82 - 1.35 | 0.70 |
| <b>Death without recurrence during first year</b>           |                      |                    |          |            |        |             |      |
| By entry age (years) %/woman-years                          |                      |                    |          |            |        |             |      |
| <55                                                         | 0.06 (3/4855)        | 0.04 (2/4928)      | 0.5      | 1.2        | 1.52   | 0.25 - 9.08 | 0.65 |
| 55 - 69                                                     | 0.47 (16/3430)       | 0.44 (15/3407)     | 1.0      | 7.6        | 1.14   | 0.56 - 2.32 | 0.72 |
| ≥70                                                         | 1.81 (5/276)         | 1.04 (3/286)       | 0.5      | 1.7        | 1.34   | 0.30 - 6.03 | 0.70 |
| All ages                                                    | 0.28 (24/8561)       | 0.23 (20/8621)     | 2.0      | 10.5       | 1.21   | 0.66 - 2.22 | 0.54 |
| <b>Second primary cancer incidence</b>                      |                      |                    |          |            |        |             |      |
| By entry age (years) %/woman-years                          |                      |                    |          |            |        |             |      |
| <55                                                         | 0.41 (99/24386)      | 0.35 (88/24867)    | 6.9      | 45.9       | 1.16   | 0.87 - 1.55 | 0.31 |
| 55 - 69                                                     | 0.57 (87/15698)      | 0.57 (88/15439)    | -2.8     | 42.8       | 0.94   | 0.69 - 1.26 | 0.67 |
| ≥70                                                         | 0.82 (7/854)         | 0.45 (4/901)       | 0.2      | 1.9        | 1.11   | 0.27 - 4.61 | 0.89 |
| All ages                                                    | 0.47 (193/40938)     | 0.44 (180/41207)   | 4.3      | 90.5       | 1.05   | 0.85 - 1.29 | 0.65 |

| Second cancer incidence       | Tax+Anth | Taxane |
|-------------------------------|----------|--------|
| <b>Haematological</b>         |          |        |
| AML                           | 12       | 2      |
| Lymphoma                      | 4        | 2      |
| <b>Lung/Thoracic</b>          | 23       | 33     |
| <b>Colorectal</b>             | 15       | 9      |
| <b>Upper Gastrointestinal</b> |          |        |
| Gastric                       | 7        | 4      |
| Oesophagus                    | 1        | 0      |
| Small intestine               | 0        | 2      |
| Pancreas                      | 3        | 7      |
| <b>Gynaecological</b>         |          |        |
| Uterine/Endometrial           | 12       | 8      |
| Ovarian                       | 6        | 10     |
| Cervical                      | 3        | 8      |
| Vulva                         | 0        | 3      |
| <b>Urological</b>             |          |        |
| Renal                         | 4        | 3      |
| Bladder                       | 2        | 0      |
| <b>Thyroid</b>                | 17       | 14     |
| <b>Epiglottis / Tonsil</b>    | 2        | 0      |
| <b>Melanoma</b>               | 8        | 11     |
| <b>Brain</b>                  | 1        | 1      |
| <b>Soft tissue /Bone</b>      | 3        | 3      |
| <b>Unspecified</b>            | 70       | 60     |
|                               | 193      | 180    |

P22: AML incidence in trials of taxane plus anthracycline versus taxane without anthracycline. All trial comparisons (a)-(d)

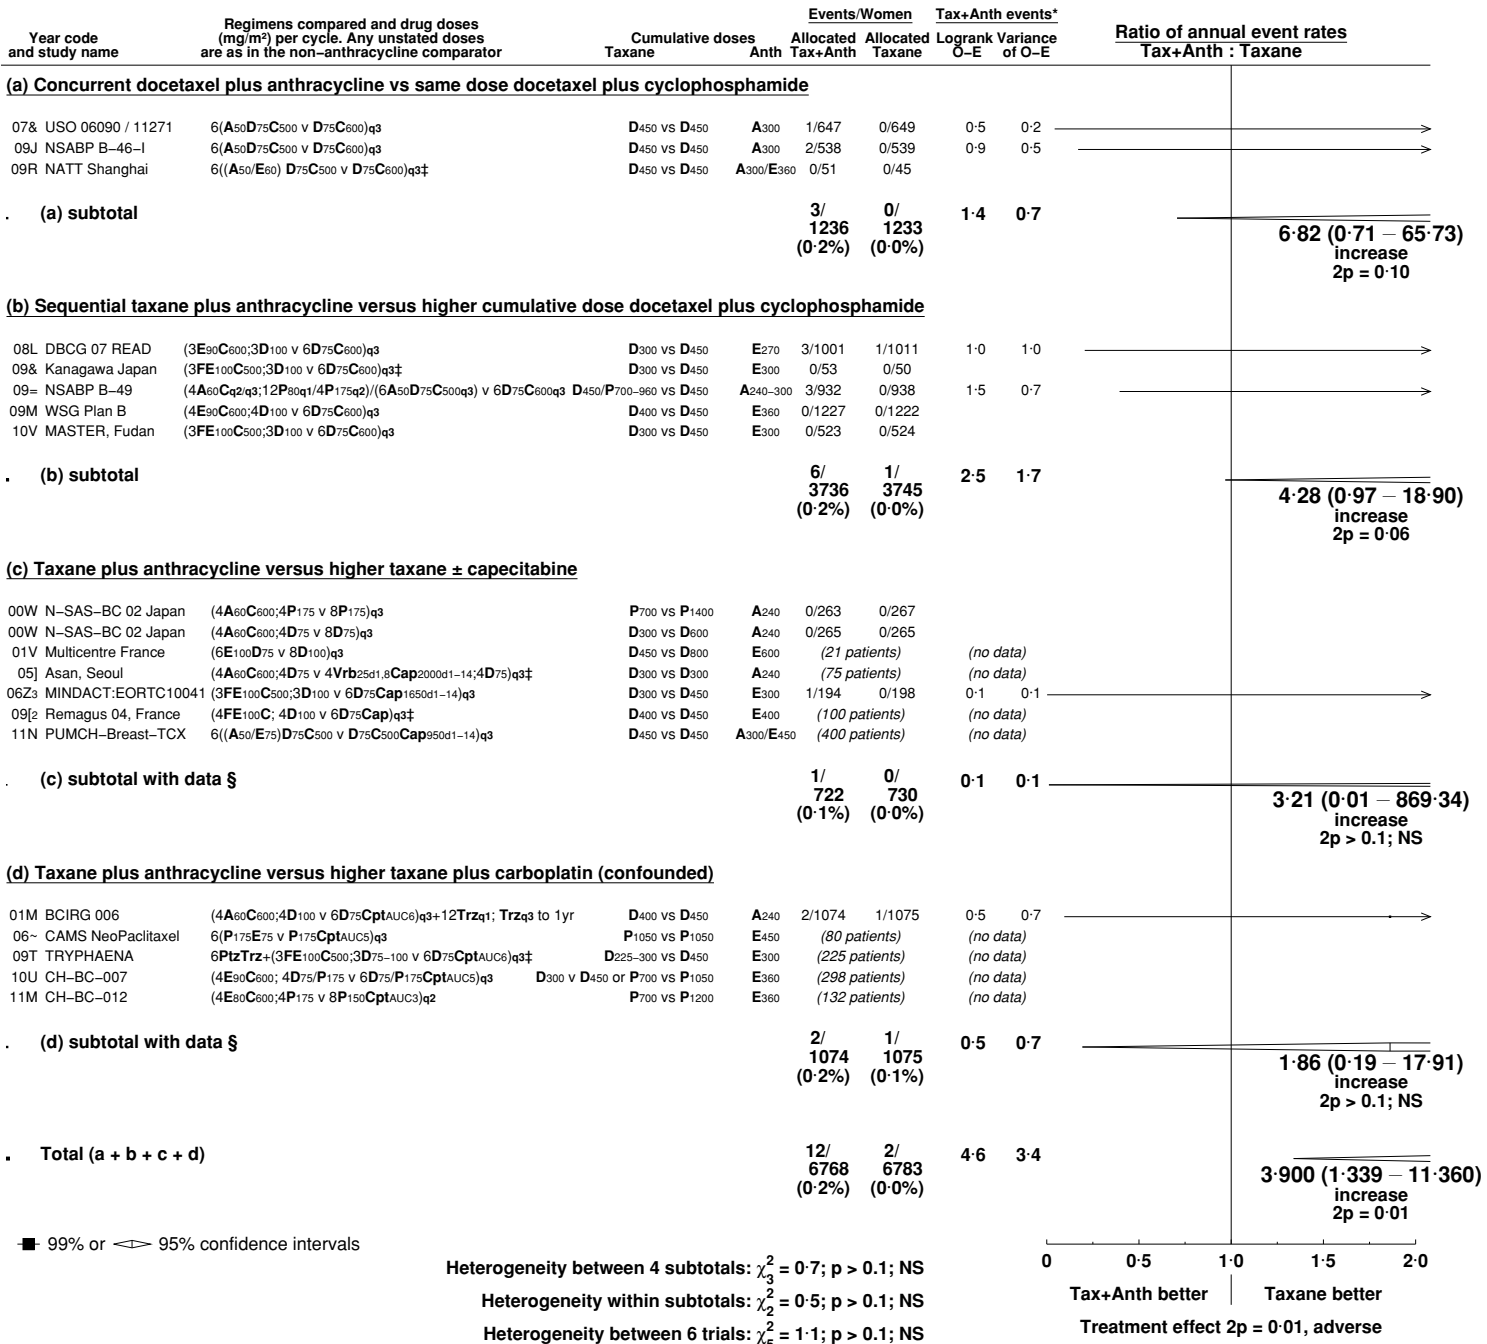

‡ Pre-operative chemotherapy

v.v Vice versa

Taxanes: D = docetaxel; P = paclitaxel

Anthracyclines: A = doxorubicin (Adriamycin); E = epirubicin

Other agents: C = cyclophosphamide; F = fluorouracil; M = methotrexate; Trz = trastuzumab; Vrb = vinorelbine; Cap = capecitabine; Cpt = carboplatin; Ptz = pertuzumab

P23: Sensitivity analyses for death without recurrence by tumour size and nodal status. All trial comparisons (a)-(d).

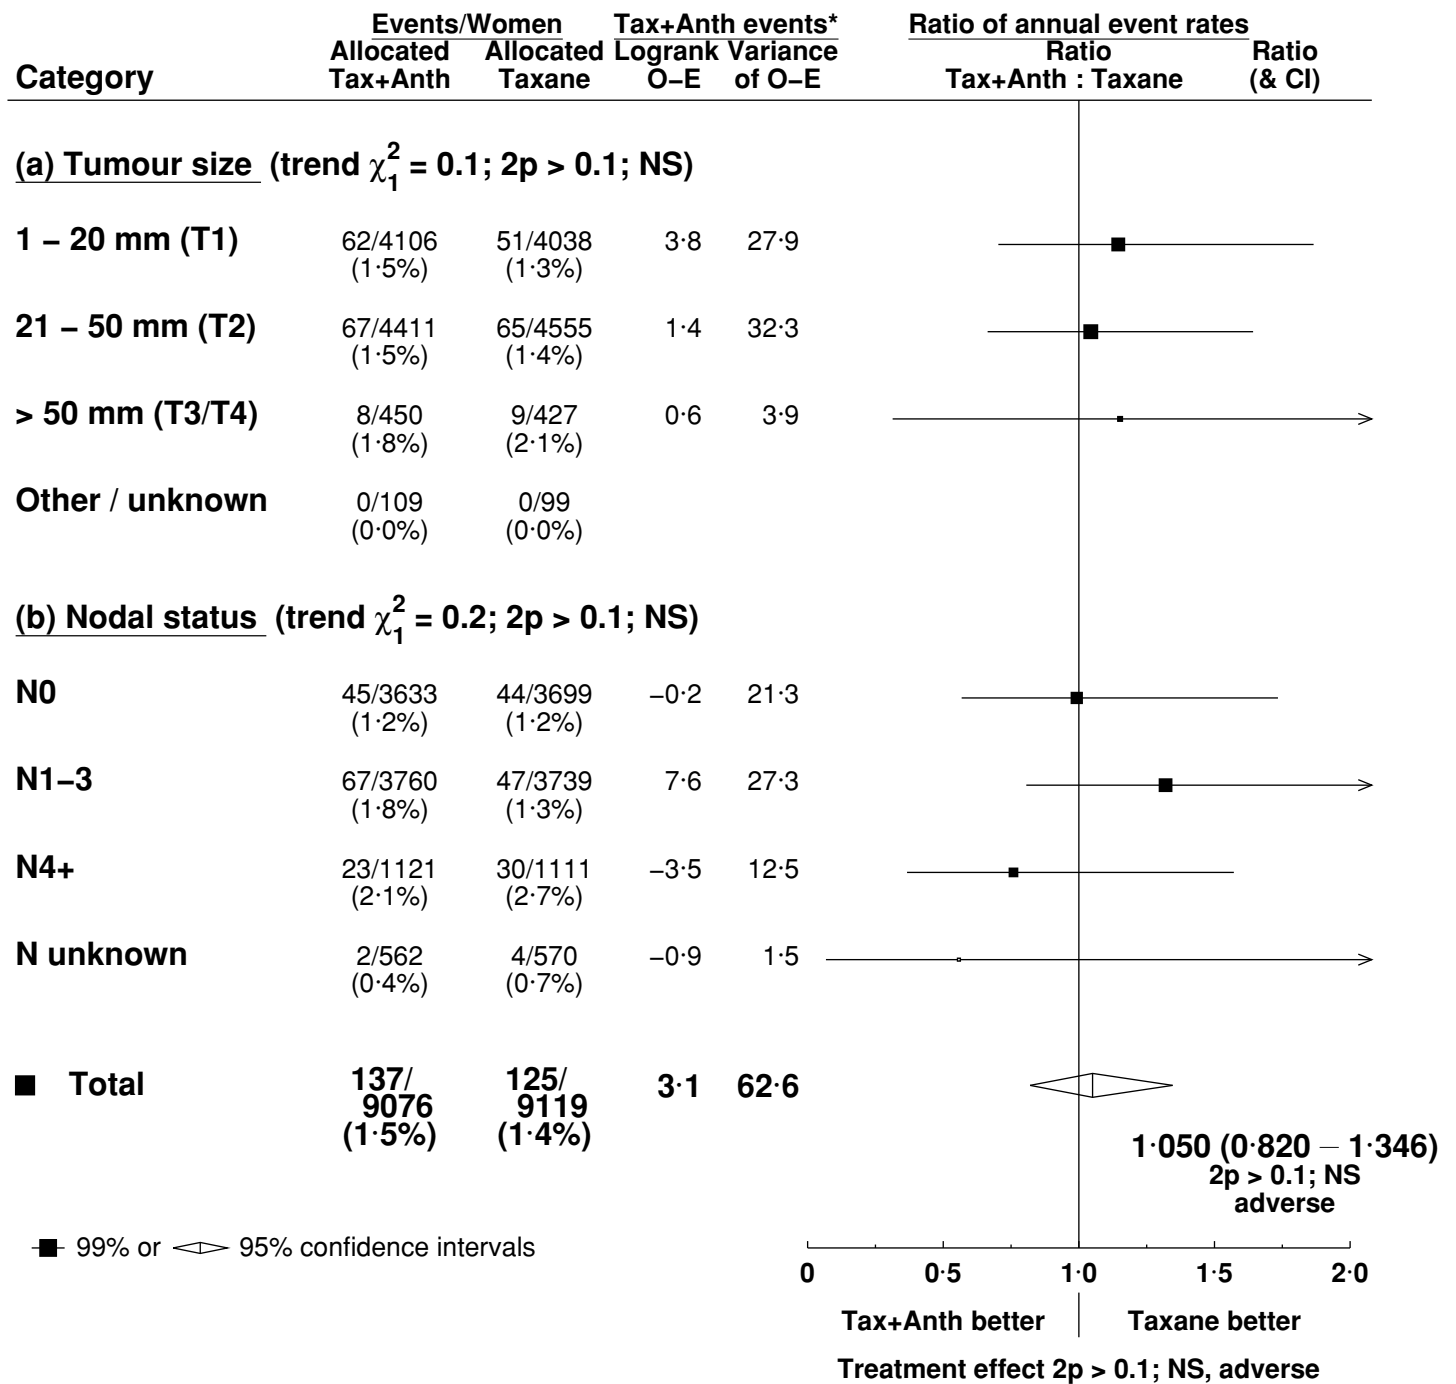

P24: Any recurrence in trials of taxane-plus-anthracycline-based regimen vs same, or more (<doubled or ~doubled) non-taxane cytotoxic chemotherapy

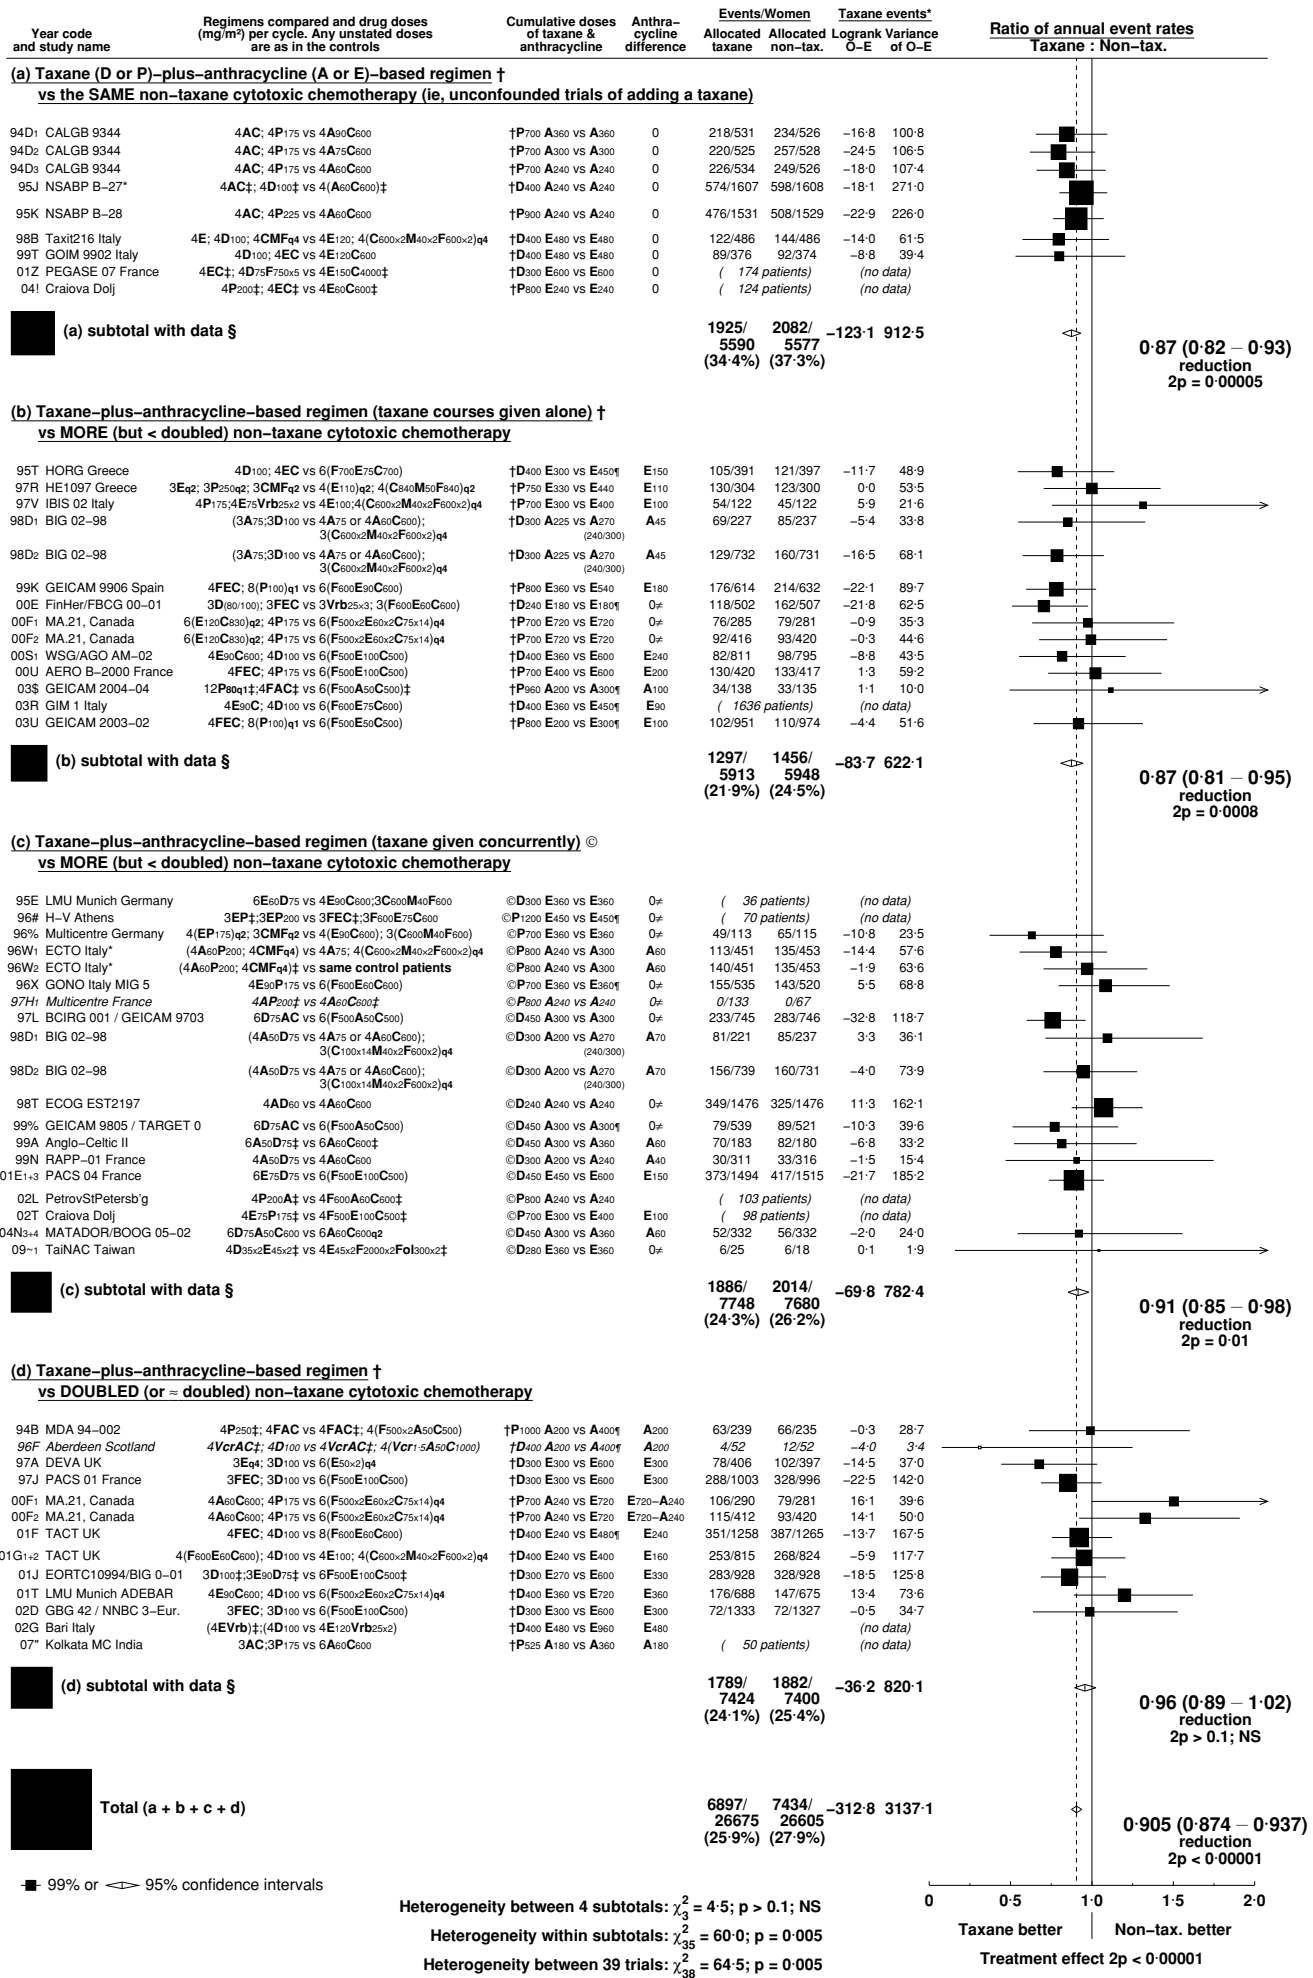

■ 99% or <> 95% confidence intervals

Heterogeneity between 4 subtotals:  $\chi^2_3 = 4.5$ ;  $p > 0.1$ ; NS  
 Heterogeneity within subtotals:  $\chi^2_{35} = 60.0$ ;  $p = 0.005$   
 Heterogeneity between 39 trials:  $\chi^2_{38} = 64.5$ ;  $p = 0.005$

0 0.5 1.0 1.5 2.0  
 Taxane better Non-tax. better  
 Treatment effect  $2p < 0.00001$

\* For 3-way trials versus the same control patients  
 † Taxane courses do not overlap with any other chemotherapy courses; hence, total chemotherapy duration is increased  
 ‡ Pre-operative chemotherapy  
 © Concurrent treatment with taxane and anthracycline; total chemotherapy duration and number of courses not increased  
 ≠ Same cumulative anthracycline dose, but differences in other drugs  
 ¶ Control anthracycline dose less than E90 or A60 per cycle  
 Taxanes: D = docetaxel; P = paclitaxel. Anthracyclines: A = doxorubicin (Adriamycin); E = Epirubicin. Other agents: C = cyclophosphamide; F = fluorouracil; Fol = folinic acid; M = methotrexate; Vcr = vincristine; Vrb = vinorelbine  
 (Not shown: G-CSF, erythropoietin, trastuzumab, antibiotic, hormonal, local or steroid therapies)  
 All regimens q3week (unless specified as q1, q2 or q4). Semicolon ;| indicates treatment sequence. x14 means d1-14 po; x2 (x3) means d1, d8 (d15) iv  
 03S at discretion local investigators could have used epirubicin 100mg/m2 instead of doxorubicin 50mg/m2



P25: 10-year cumulative risk of (A) any recurrence, (B) breast cancer mortality, (C) death without recurrence, (D) all-cause mortality; in trials of taxane-plus-anthracycline-based regimen vs same, or more (<doubled or ~doubled) non-taxane cytotoxic chemotherapy

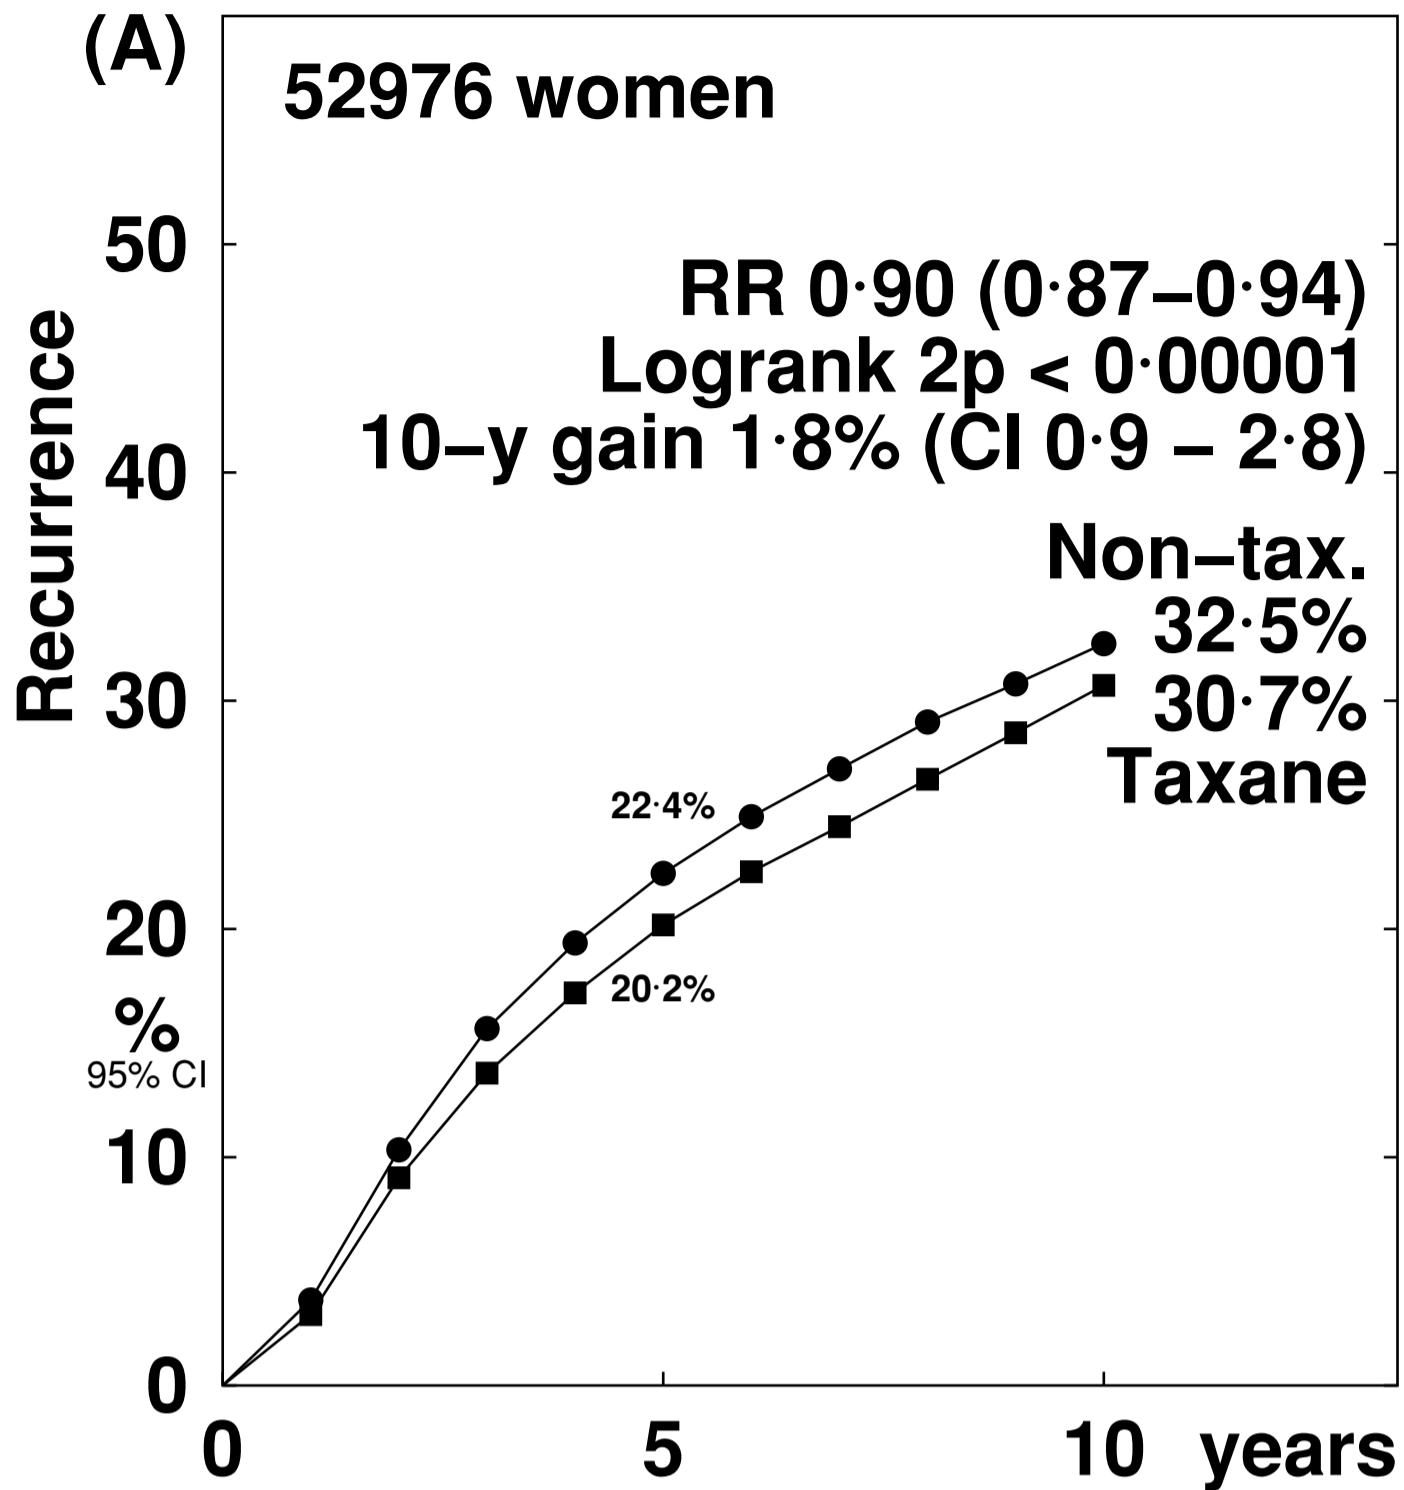

Recurrence rates (% / year) and logrank analyses

| Allocation                 | Years 0 – 4                            | Years 5 – 9                         | Year 10+                             |
|----------------------------|----------------------------------------|-------------------------------------|--------------------------------------|
| Taxane                     | 4.53 (5047 / 111389)                   | 2.81 (1609 / 57166)                 | 1.85 (237 / 12790)                   |
| Non–tax.                   | 5.14 (5629 / 109489)                   | 2.84 (1554 / 54691)                 | 1.98 (239 / 12041)                   |
| Rate ratio, from (O–E) / V | 0.88 CI 0.85 – 0.92<br>–303.2 / 2400.4 | 0.99 CI 0.92 – 1.06<br>–8.5 / 743.4 | 0.89 CI 0.74 – 1.07<br>–13.3 / 111.0 |

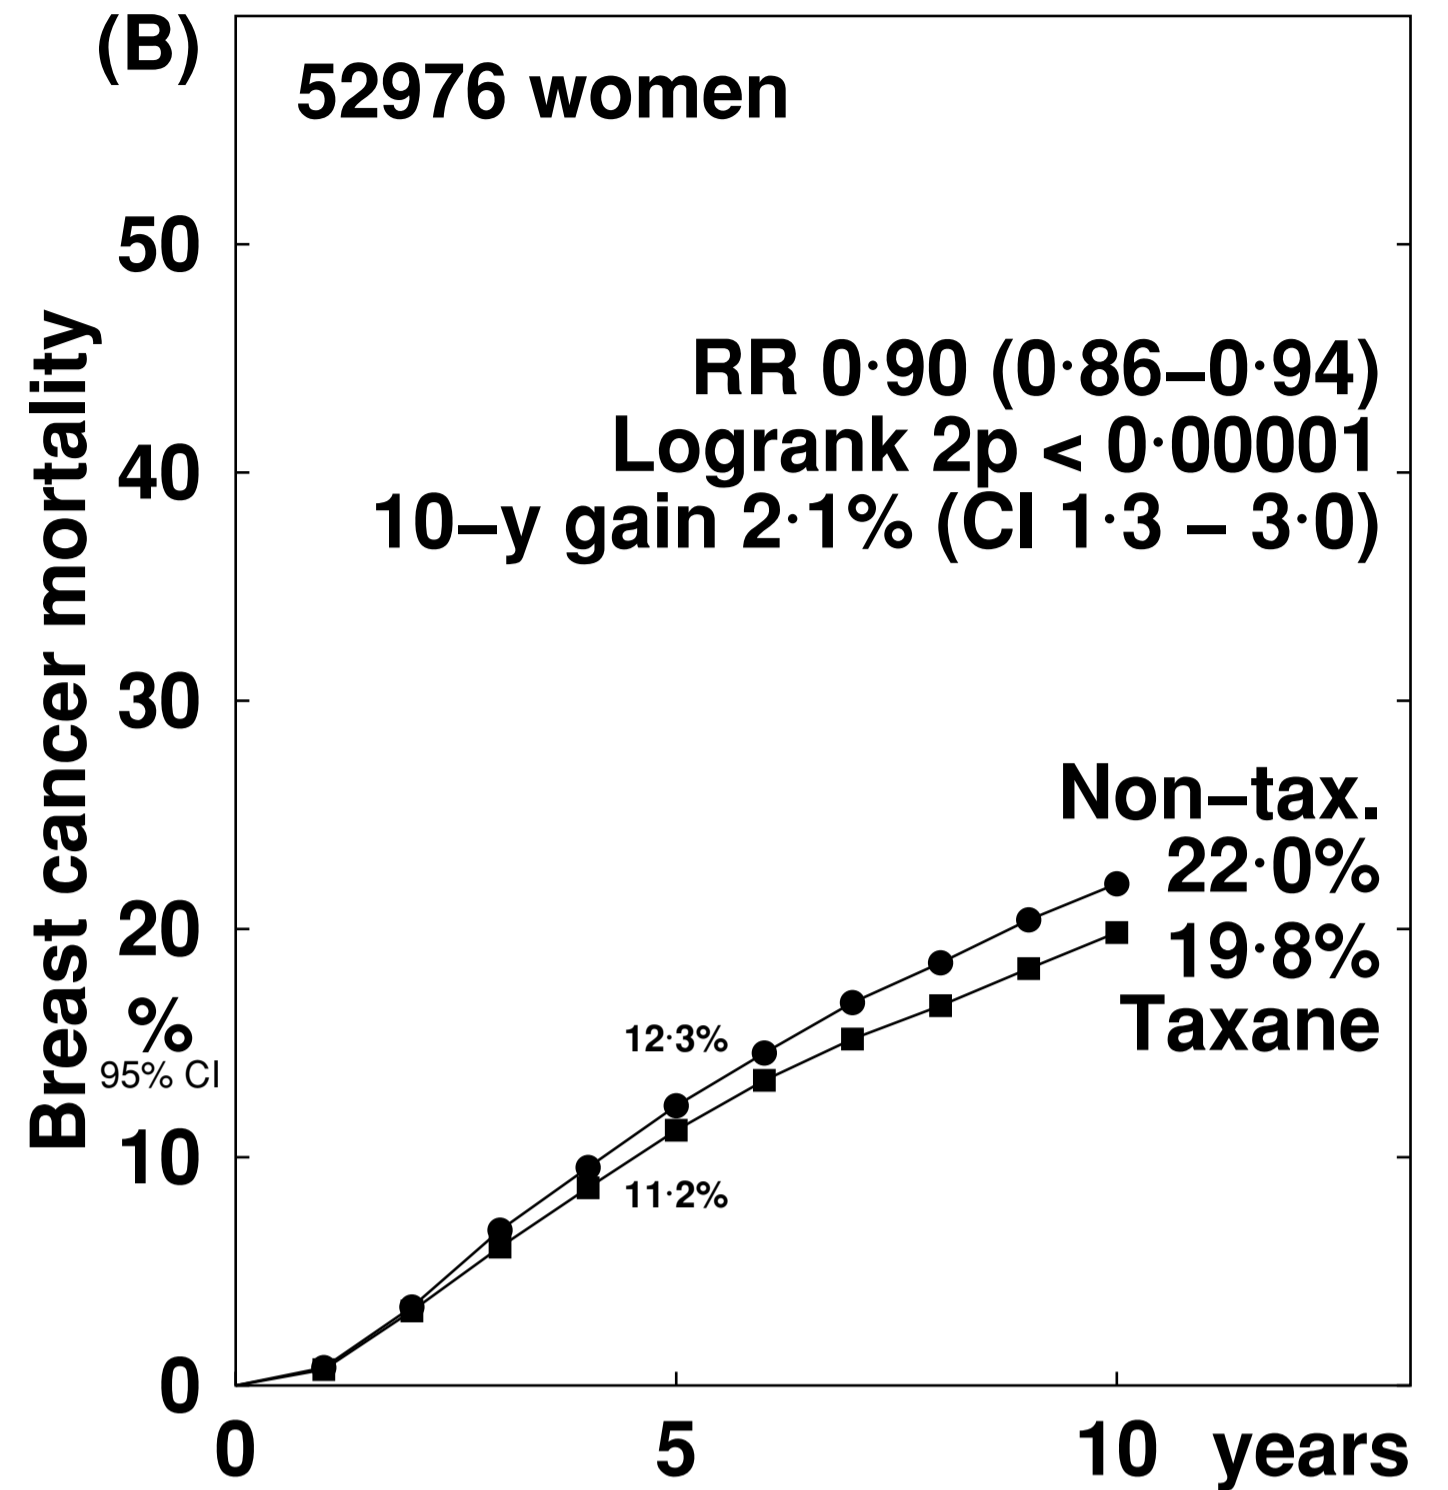

Death rates (% / year: total rate – rate in women without recurrence) & logrank analyses

| Allocation                 | Years 0 – 4                            | Years 5 – 9                          | Year 10+                           |
|----------------------------|----------------------------------------|--------------------------------------|------------------------------------|
| Taxane                     | 2.31 CI 2.23 – 2.40                    | 2.12 CI 2.00 – 2.23                  | 1.70 CI 1.49 – 1.90                |
| Non–tax.                   | 2.58 CI 2.49 – 2.67                    | 2.38 CI 2.26 – 2.50                  | 1.54 CI 1.34 – 1.74                |
| Rate ratio, from (O–E) / V | 0.91 CI 0.86 – 0.95<br>–133.1 / 1334.2 | 0.87 CI 0.81 – 0.94<br>–95.1 / 679.6 | 1.09 CI 0.91 – 1.31<br>9.9 / 113.4 |

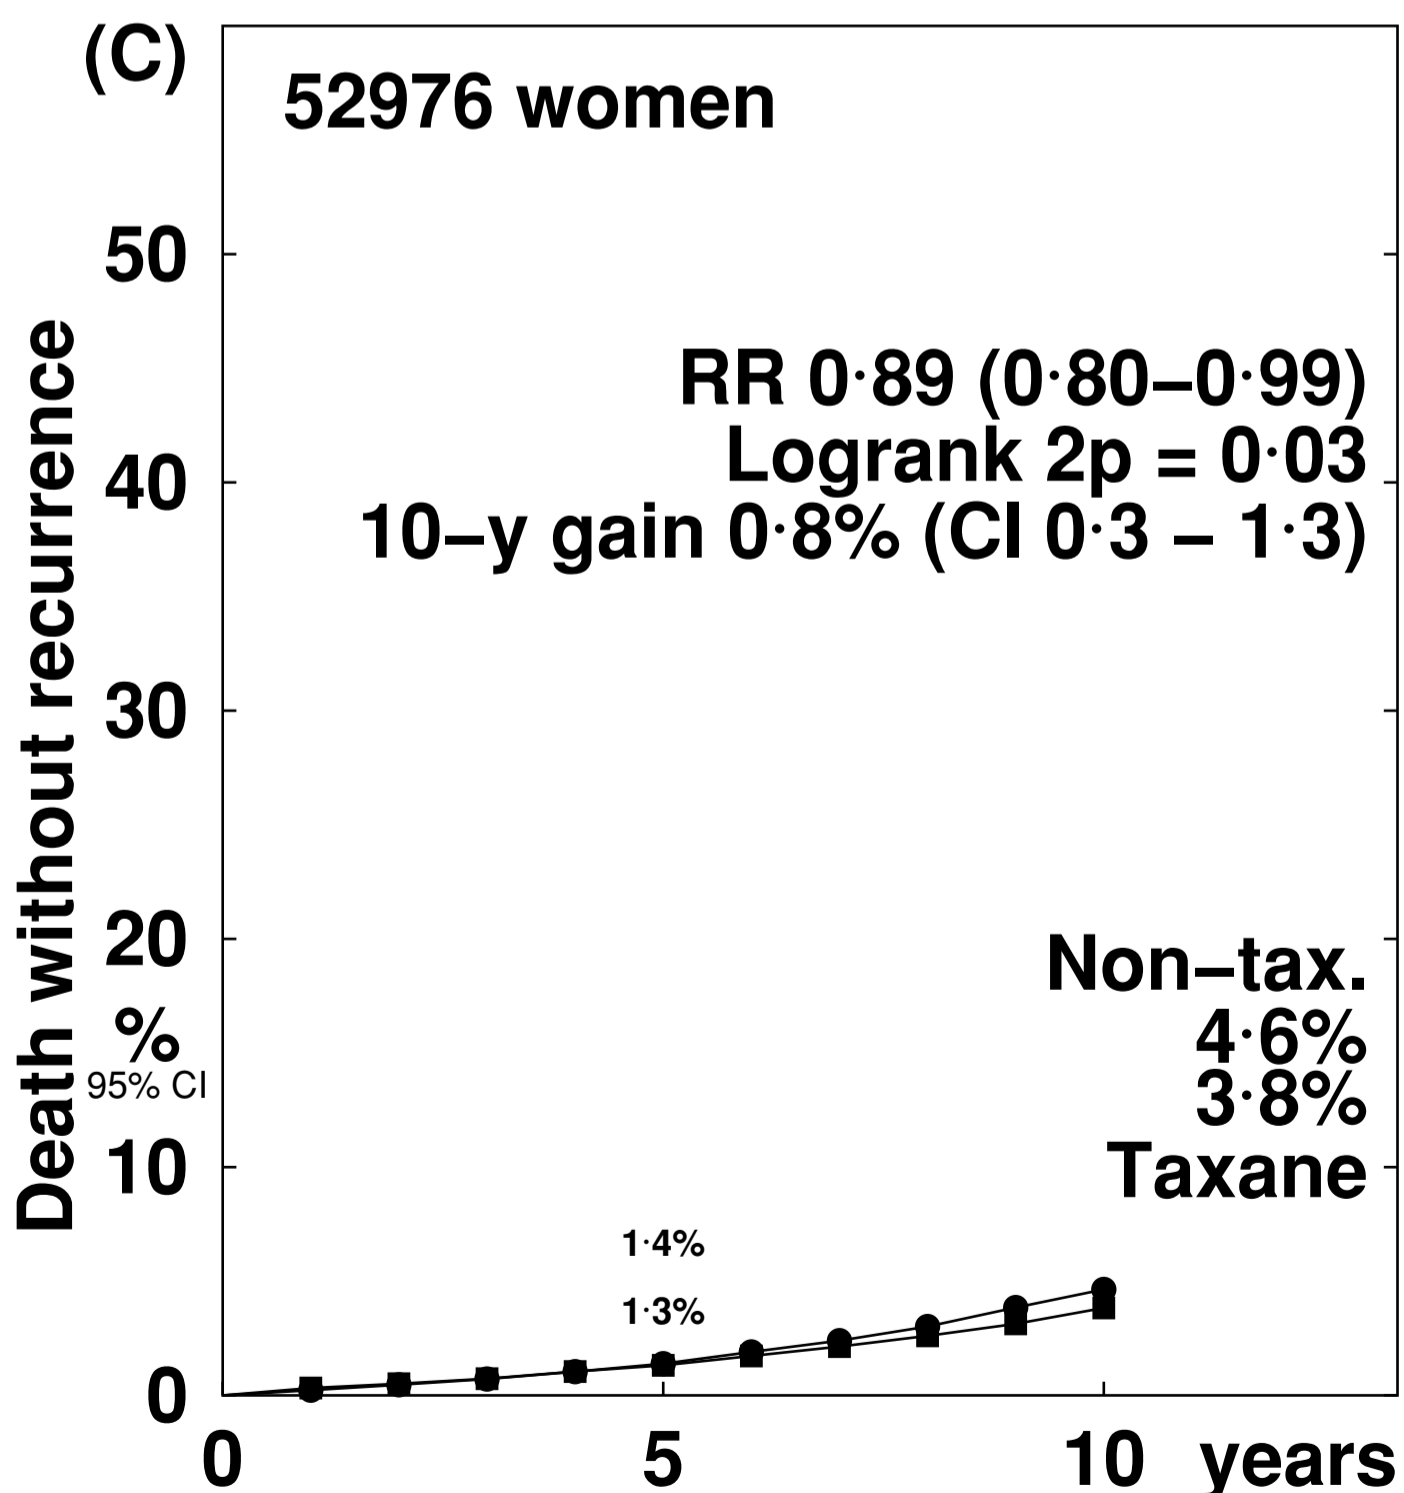

Death–without–recurrence rates (% / year) and logrank analyses

| Allocation                 | Years 0 – 4                         | Years 5 – 9                          | Year 10+                          |
|----------------------------|-------------------------------------|--------------------------------------|-----------------------------------|
| Taxane                     | 0.26 (293 / 111389)                 | 0.50 (283 / 57166)                   | 1.19 (152 / 12790)                |
| Non–tax.                   | 0.27 (301 / 109489)                 | 0.63 (347 / 54691)                   | 1.16 (140 / 12041)                |
| Rate ratio, from (O–E) / V | 0.97 CI 0.82 – 1.14<br>–5.1 / 143.6 | 0.77 CI 0.65 – 0.90<br>–39.3 / 149.2 | 1.04 CI 0.82 – 1.33<br>2.8 / 65.8 |

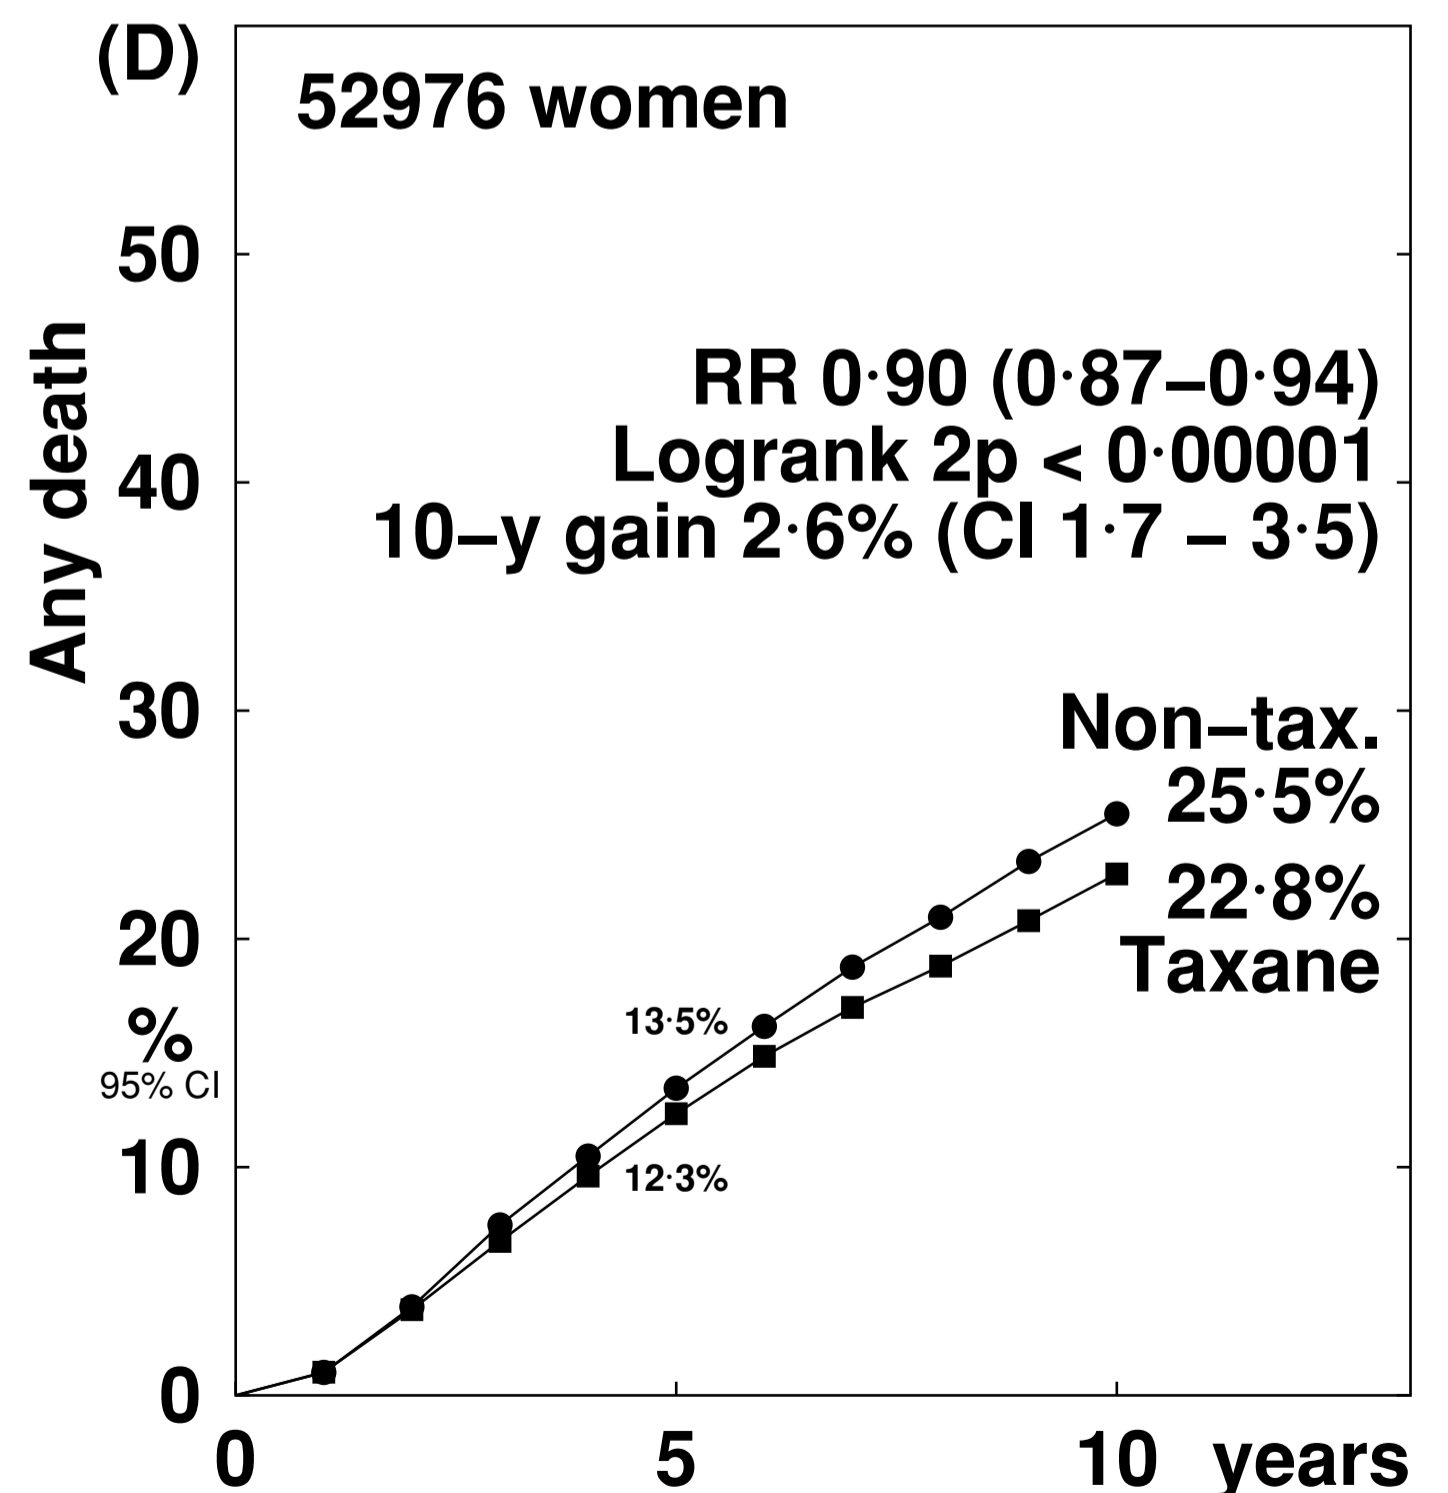

Death rates (% / year) and logrank analyses

| Allocation                 | Years 0 – 4                            | Years 5 – 9                           | Year 10+                            |
|----------------------------|----------------------------------------|---------------------------------------|-------------------------------------|
| Taxane                     | 2.57 (3040 / 118173)                   | 2.59 (1663 / 64274)                   | 2.79 (414 / 14837)                  |
| Non–tax.                   | 2.85 (3349 / 117405)                   | 3.01 (1878 / 62350)                   | 2.65 (370 / 13967)                  |
| Rate ratio, from (O–E) / V | 0.91 CI 0.87 – 0.96<br>–138.1 / 1477.8 | 0.85 CI 0.79 – 0.91<br>–134.4 / 828.8 | 1.07 CI 0.93 – 1.24<br>12.7 / 179.2 |

# P26: Any recurrence in trials of taxane-based regimens versus anthracycline-based regimens

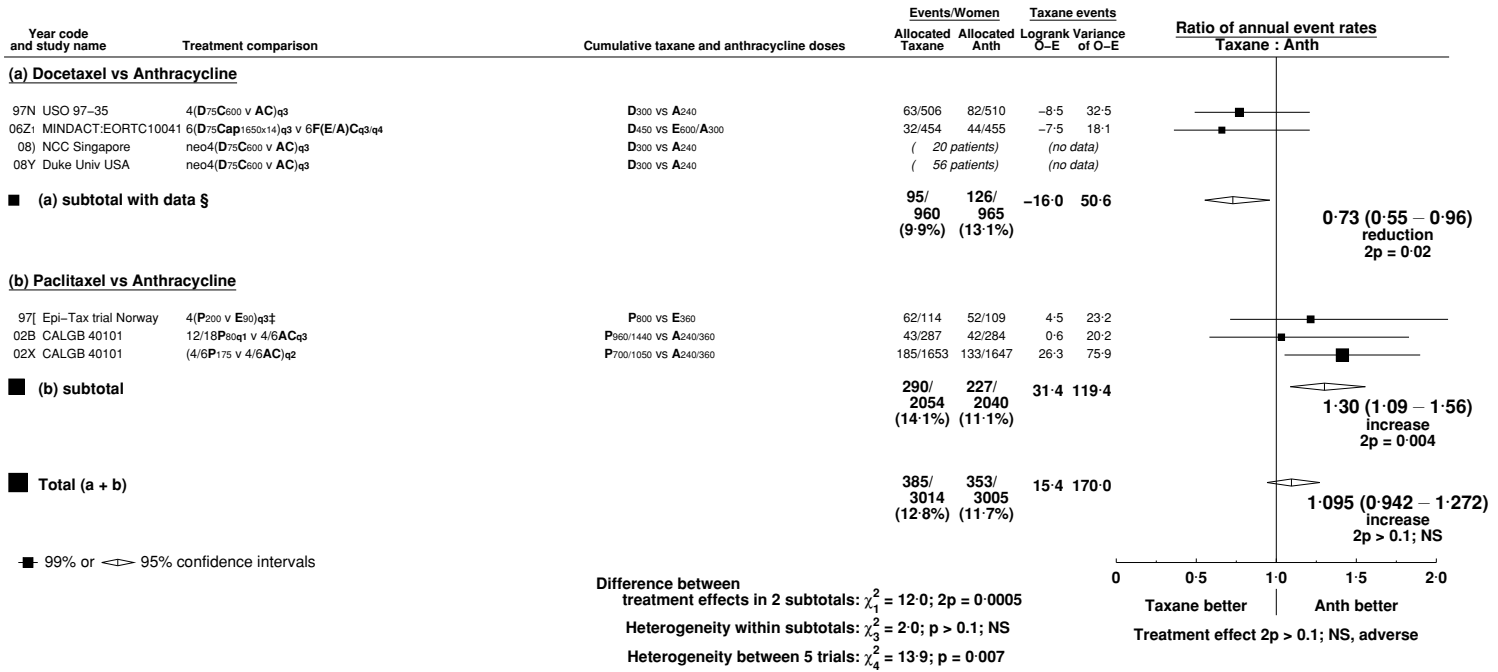

§ 2 trials with no data do not contribute to subtotals or to the overall total.

‡ Pre-operative chemotherapy

Taxanes: D = docetaxel; P = paclitaxel

Anthracyclines: A = doxorubicin (Adriamycin); E = epirubicin

Other agents: C = cyclophosphamide; F = fluorouracil; Cap = capecitabine

# P27: Any recurrence in trials of Docetaxel versus Paclitaxel

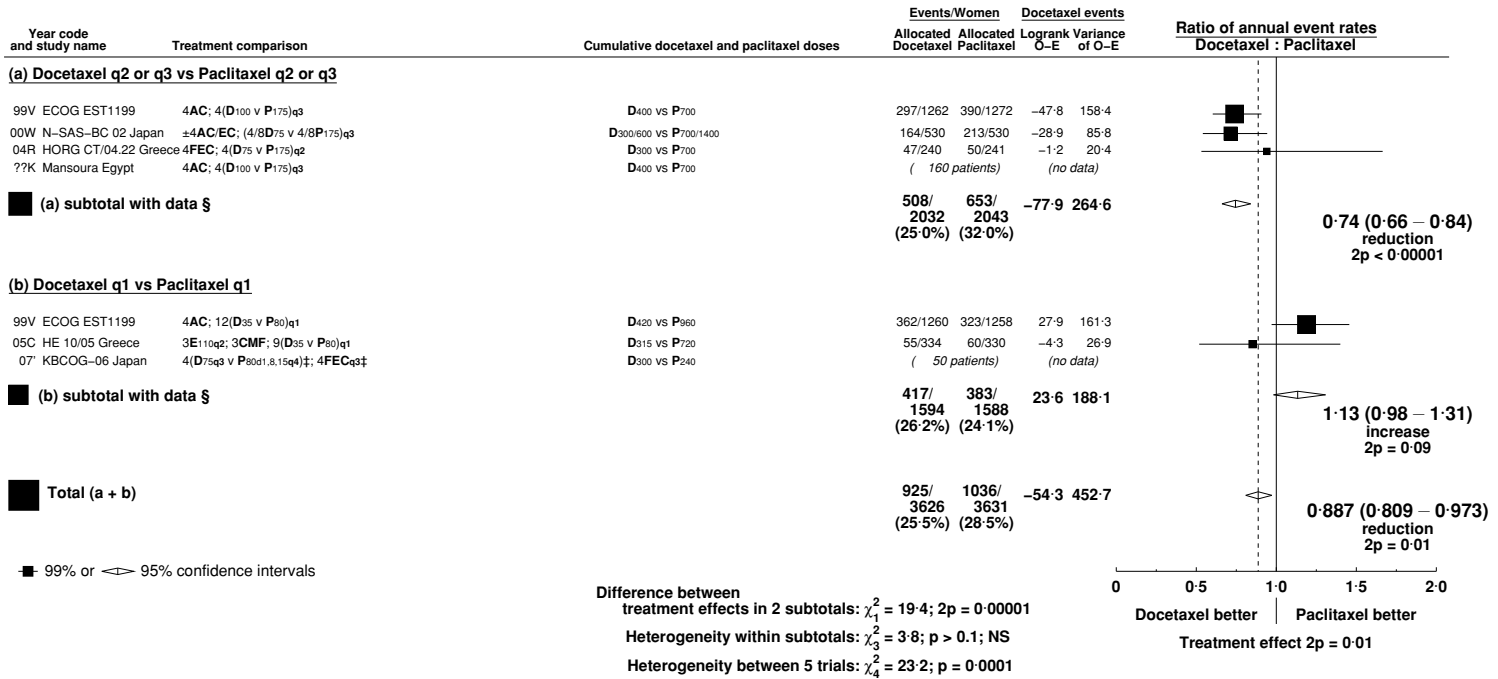

‡ Pre-operative chemotherapy

Taxanes: D = docetaxel; P = paclitaxel

Anthracyclines: A = doxorubicin (Adriamycin); E = epirubicin

Other agents: C = cyclophosphamide; F = fluorouracil

P28: Any recurrence in trials comparing similar cumulative dose taxane chemotherapy delivered in smaller vs larger fractions

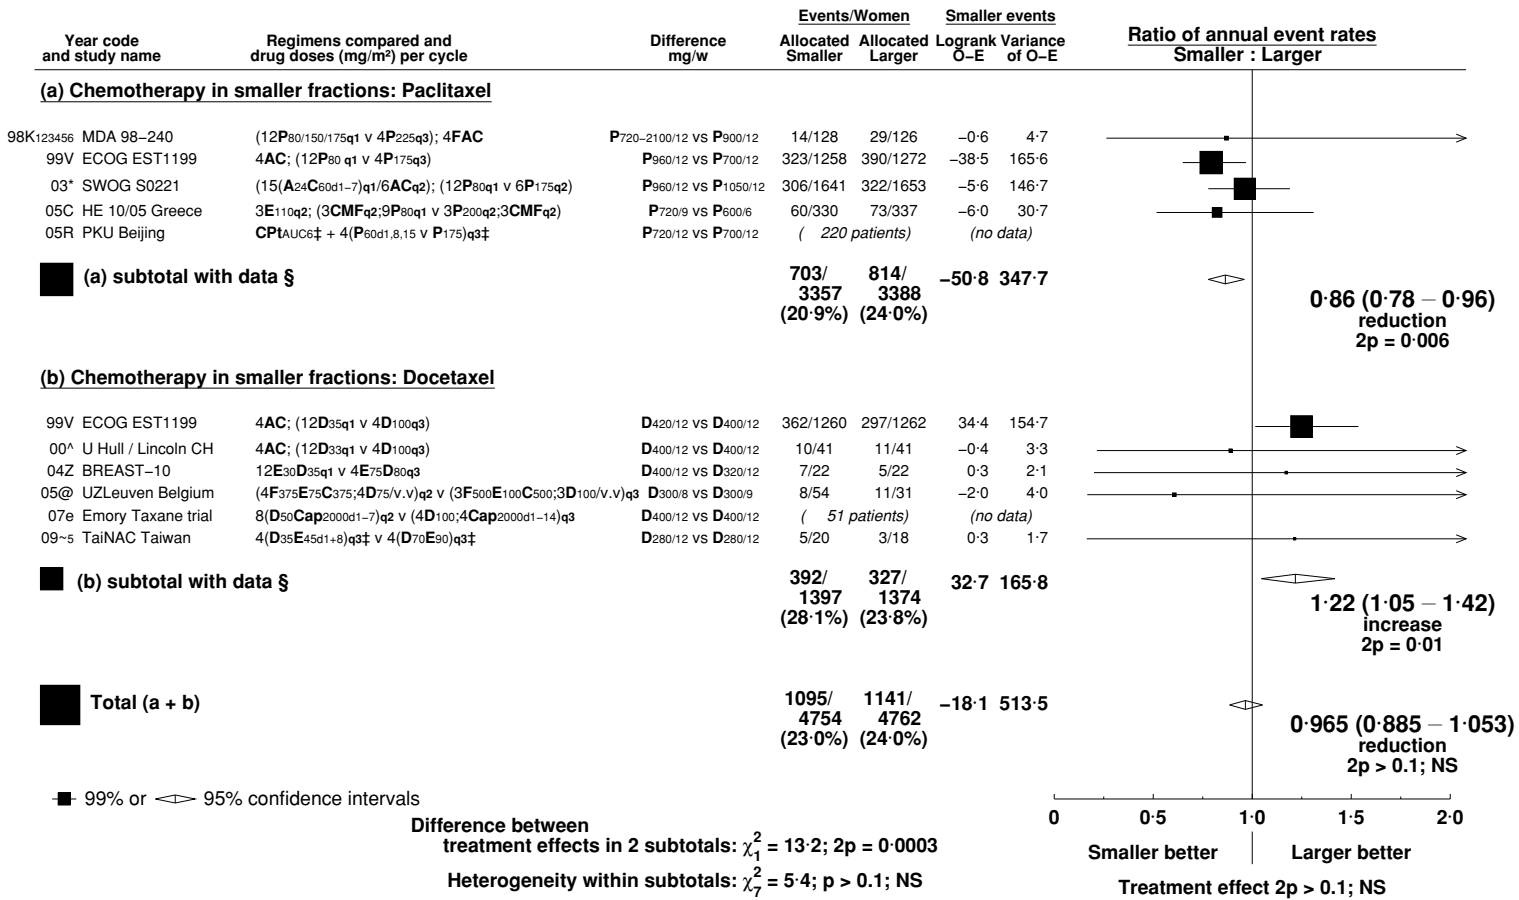

■ 99% or ◊ 95% confidence intervals

Difference between treatment effects in 2 subtotals:  $\chi^2_1 = 13.2$ ; 2p = 0.0003  
Heterogeneity within subtotals:  $\chi^2_7 = 5.4$ ; p > 0.1; NS  
Heterogeneity between 9 trials:  $\chi^2_8 = 18.6$ ; p = 0.02

§ 2 trials with no data do not contribute to subtotals or to the overall total.

‡ Pre-operative chemotherapy

v.v Vice versa

Taxanes: D = docetaxel; P = paclitaxel

Anthracyclines: A = doxorubicin (Adriamycin); E = epirubicin

Other agents: C = cyclophosphamide; F = fluorouracil; M = methotrexate; Cap = capecitabine; Cpt = carboplatin

P29: Any recurrence in trials comparing sequencing order of anthracycline and taxane chemotherapy

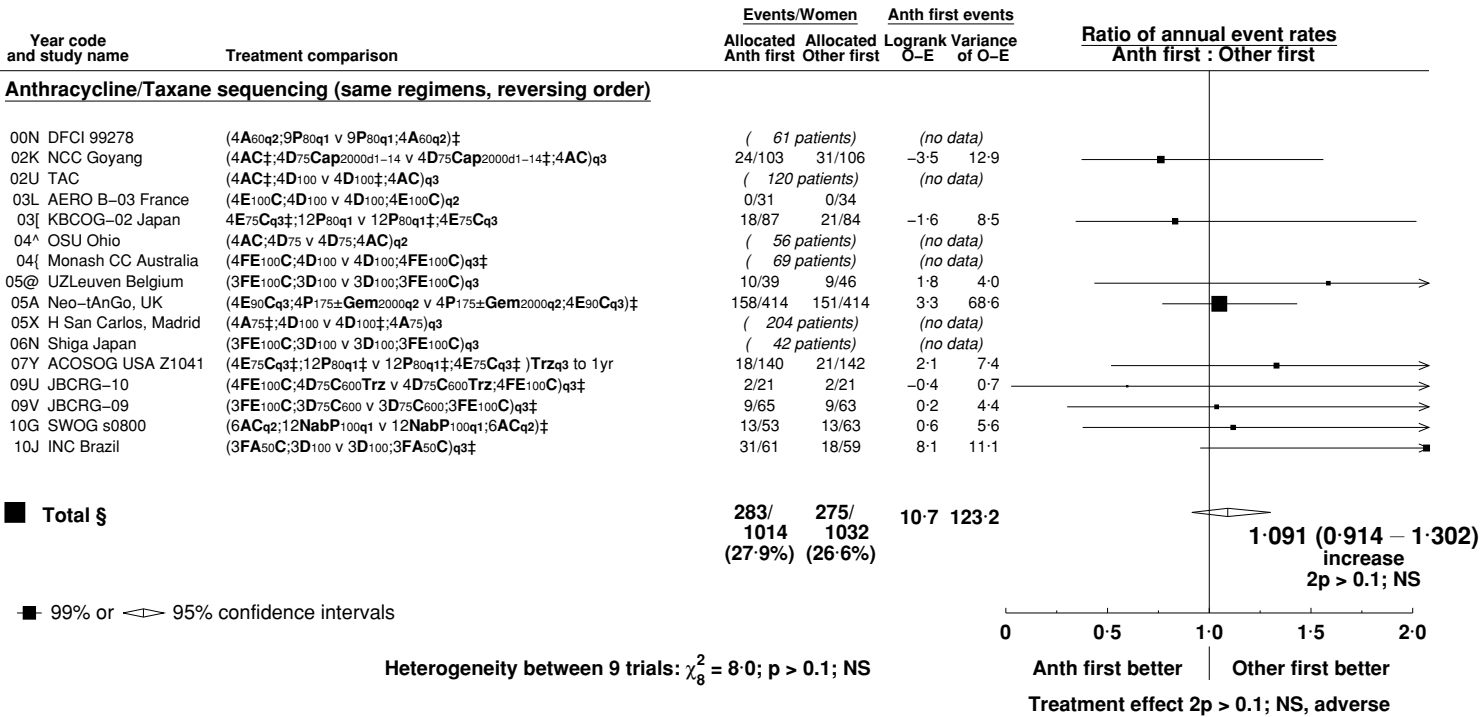

§ 6 trials with no data do not contribute to the total.

‡ Pre-operative chemotherapy

Taxanes: D = docetaxel; P = paclitaxel

Anthracyclines: A = doxorubicin (Adriamycin); E = epirubicin

Other agents: C = cyclophosphamide; F = fluorouracil; M = methotrexate; Trz = trastuzumab; Cap = capecitabine; Gem = gemcitabine; NabP = Nab paclitaxel

# P30: Any recurrence in trials of longer versus shorter atheracycline/taxane regimens

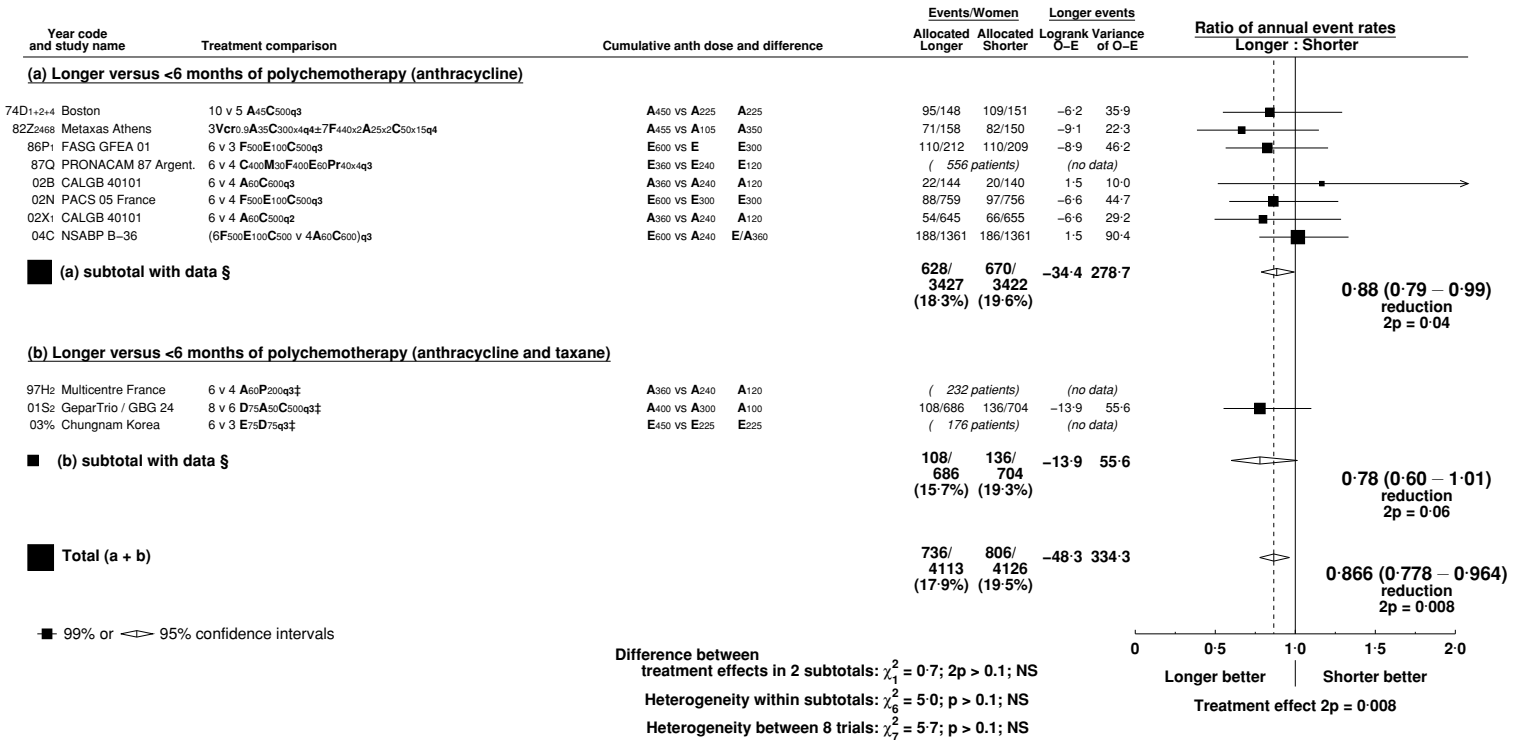

§ 3 trials with no data do not contribute to subtotals or to the overall total.

‡ Pre-operative chemotherapy

Taxanes: D = docetaxel; P = paclitaxel

Anthracyclines: A = doxorubicin (Adriamycin); E = epirubicin

Other agents: C = cyclophosphamide; F = fluorouracil; M = methotrexate; Pr = prednisone; Vcr = vincristine

# P31: Any recurrence in trials of higher versus lower anthracycline dose

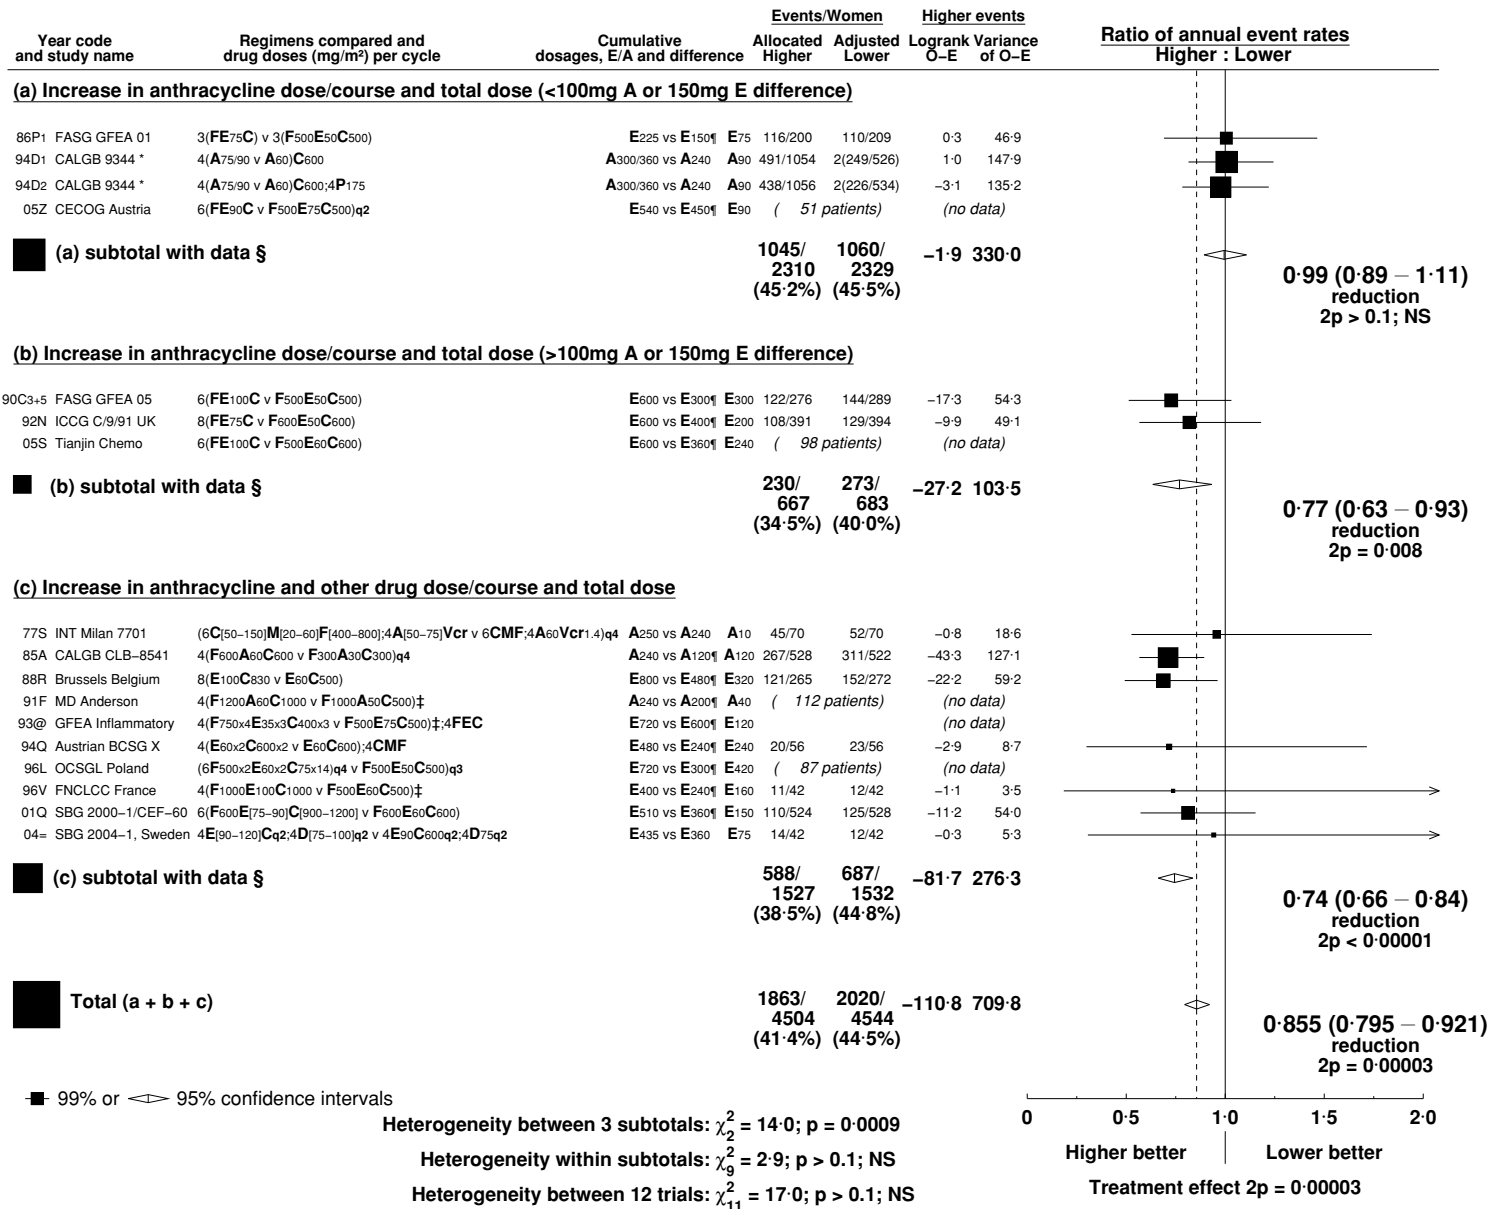

§ 5 trials with no data do not contribute to subtotals or to the overall total.

\* For balance, control patients in 3-way trials or trial strata count half or twice in subtotal(s) and in final total of events/patients.

‡ Pre-operative chemotherapy

¶ Control anthracycline dose less than E90 or A60 per cycle

Taxanes: D = docetaxel; P = paclitaxel. Anthracyclines: A = doxorubicin (Adriamycin); E = Epirubicin.

Other agents: C = cyclophosphamide; F = fluorouracil; M = methotrexate; Vcr = vincristine

All regimens q3week (unless specified as q1, q2 or q4). Semicolon [;] indicates treatment sequence. x14 means d1-14 po; x2 (x3) means d1, d8 (d15) iv

77S in control arm dose for CMF are C100M40F600

P32: Breast cancer mortality in trials of taxane-plus-anthracycline-based regimen vs same, or more (<doubled or ~doubled) non-taxane cytotoxic chemotherapy

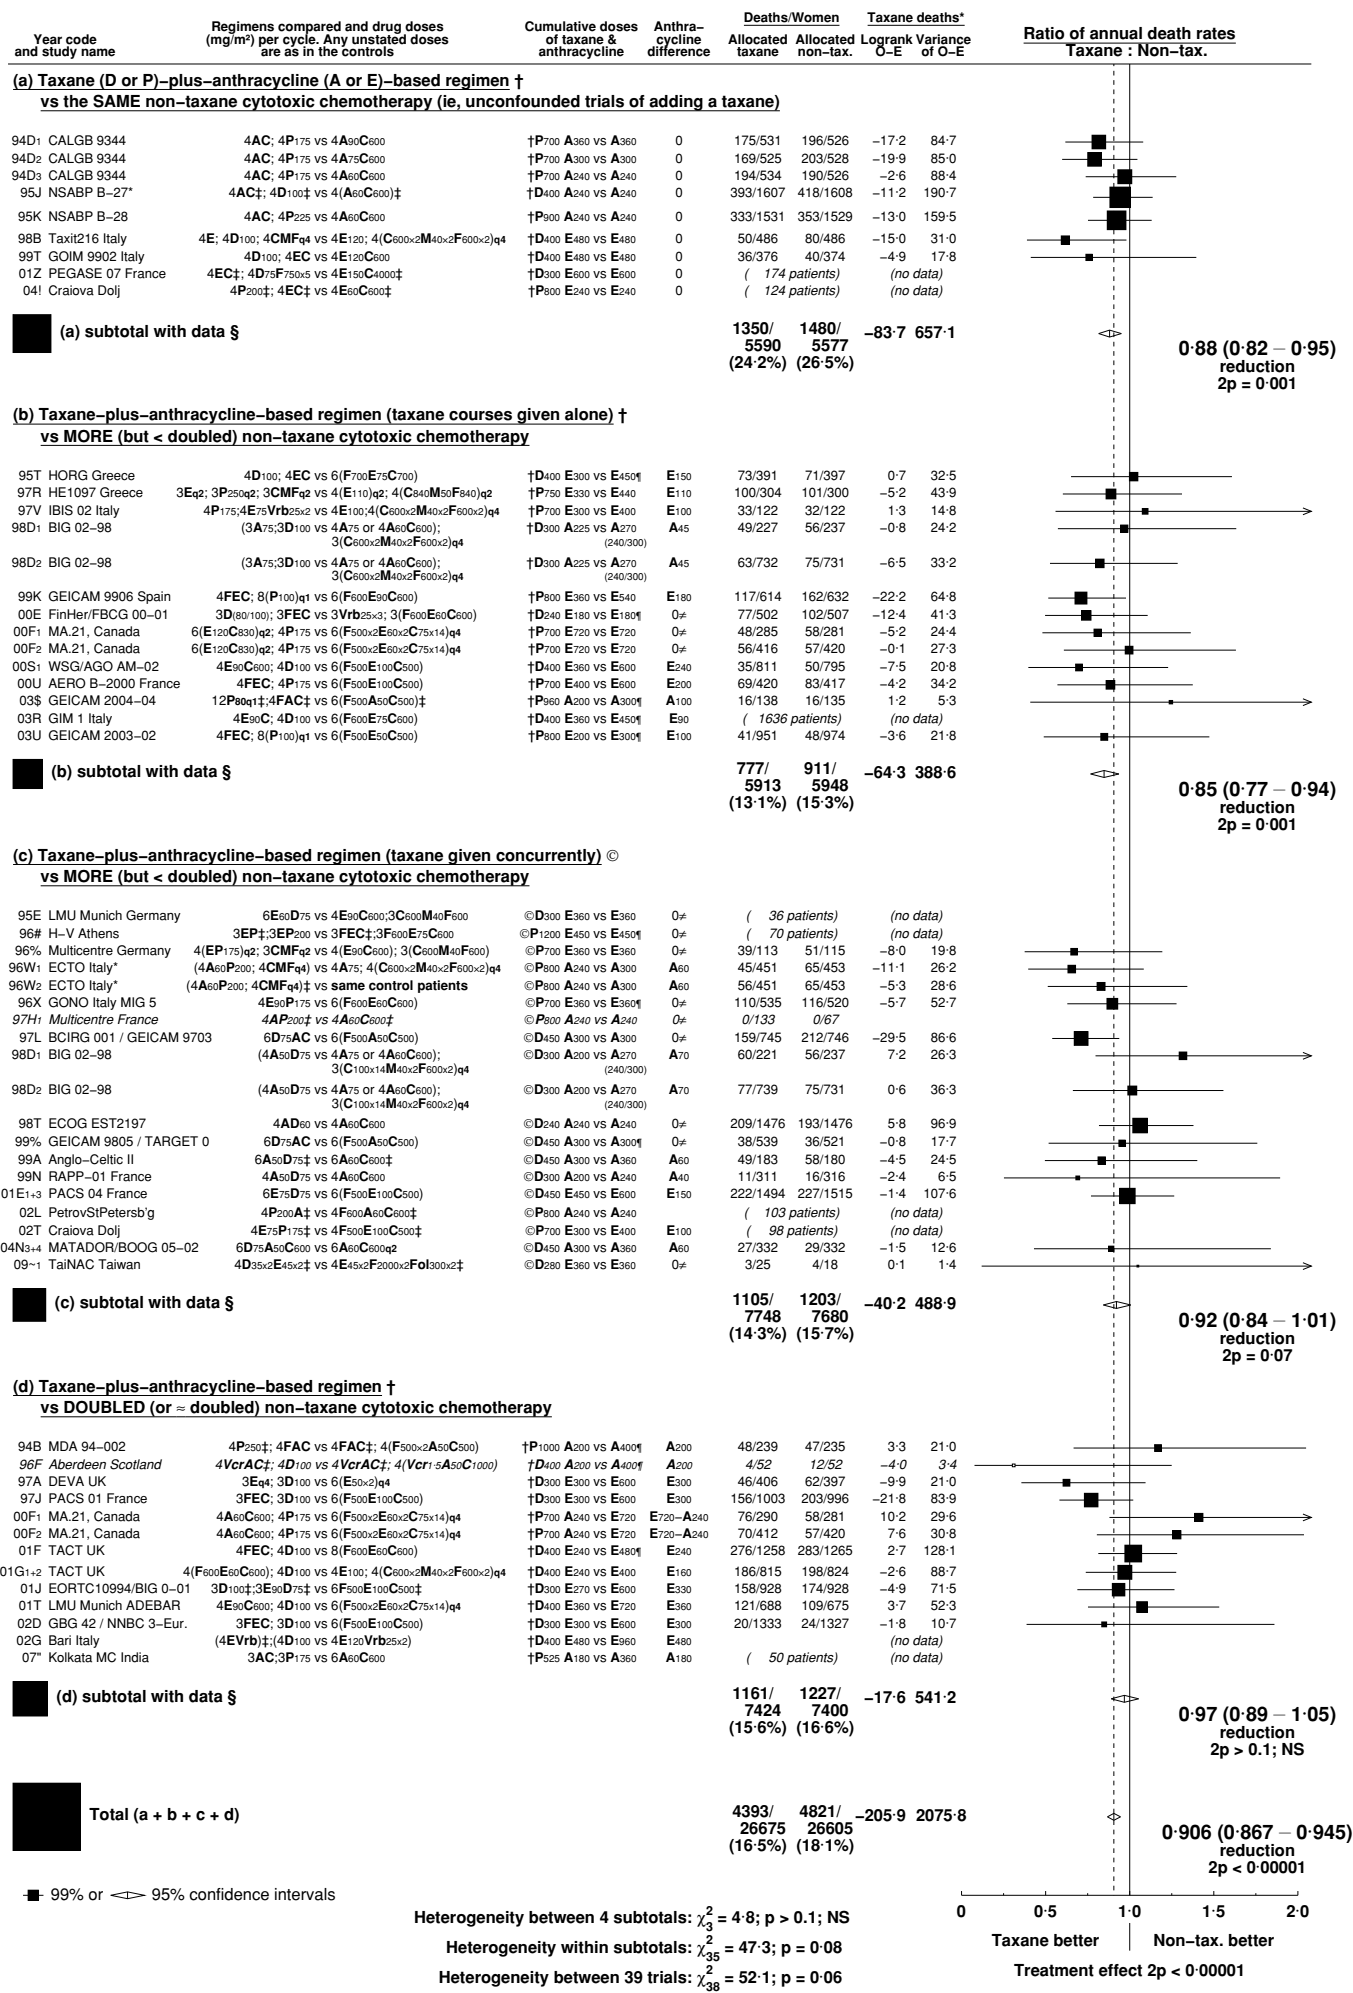

■ 99% or ◁ 95% confidence intervals

Heterogeneity between 4 subtotals:  $\chi^2_3 = 4.8$ ; p > 0.1; NS

Heterogeneity within subtotals:  $\chi^2_{35} = 47.3$ ; p = 0.08

Heterogeneity between 39 trials:  $\chi^2_{38} = 52.1$ ; p = 0.06

0 0.5 1.0 1.5 2.0  
Taxane better | Non-tax. better  
Treatment effect 2p < 0.00001

\* For 3-way trials versus the same control patients

† Taxane courses do not overlap with any other chemotherapy courses; hence, total chemotherapy duration is increased

‡ Pre-operative chemotherapy

© Concurrent treatment with taxane and anthracycline; total chemotherapy duration and number of courses not increased

≠ Same cumulative anthracycline dose, but differences in other drugs

¶ Control anthracycline dose less than E90 or A60 per cycle

Taxanes: D = docetaxel; P = paclitaxel. Anthracyclines: A = doxorubicin (Adriamycin); E = Epirubicin. Other agents: C = cyclophosphamide; F = fluorouracil; Fol = folinic acid; M = methotrexate; Vcr = vincristine; Vrb = vinorelbine (Not shown: G-CSF, erythropoietin, trastuzumab, antibiotic, hormonal, local or steroid therapies)

All regimens q3week (unless specified as q1, q2 or q4). Semicolon ; indicates treatment sequence. ×14 means d1-14 po; ×2 (×3) means d1, d8 (d15) iv

03S at discretion local investigators could have used epirubicin 100mg/m2 instead of doxorubicin 50mg/m2



P33: Death without recurrence in trials of taxane-plus-anthracycline-based regimen vs same, or more (<doubled or ~doubled) non-taxane cytotoxic chemotherapy

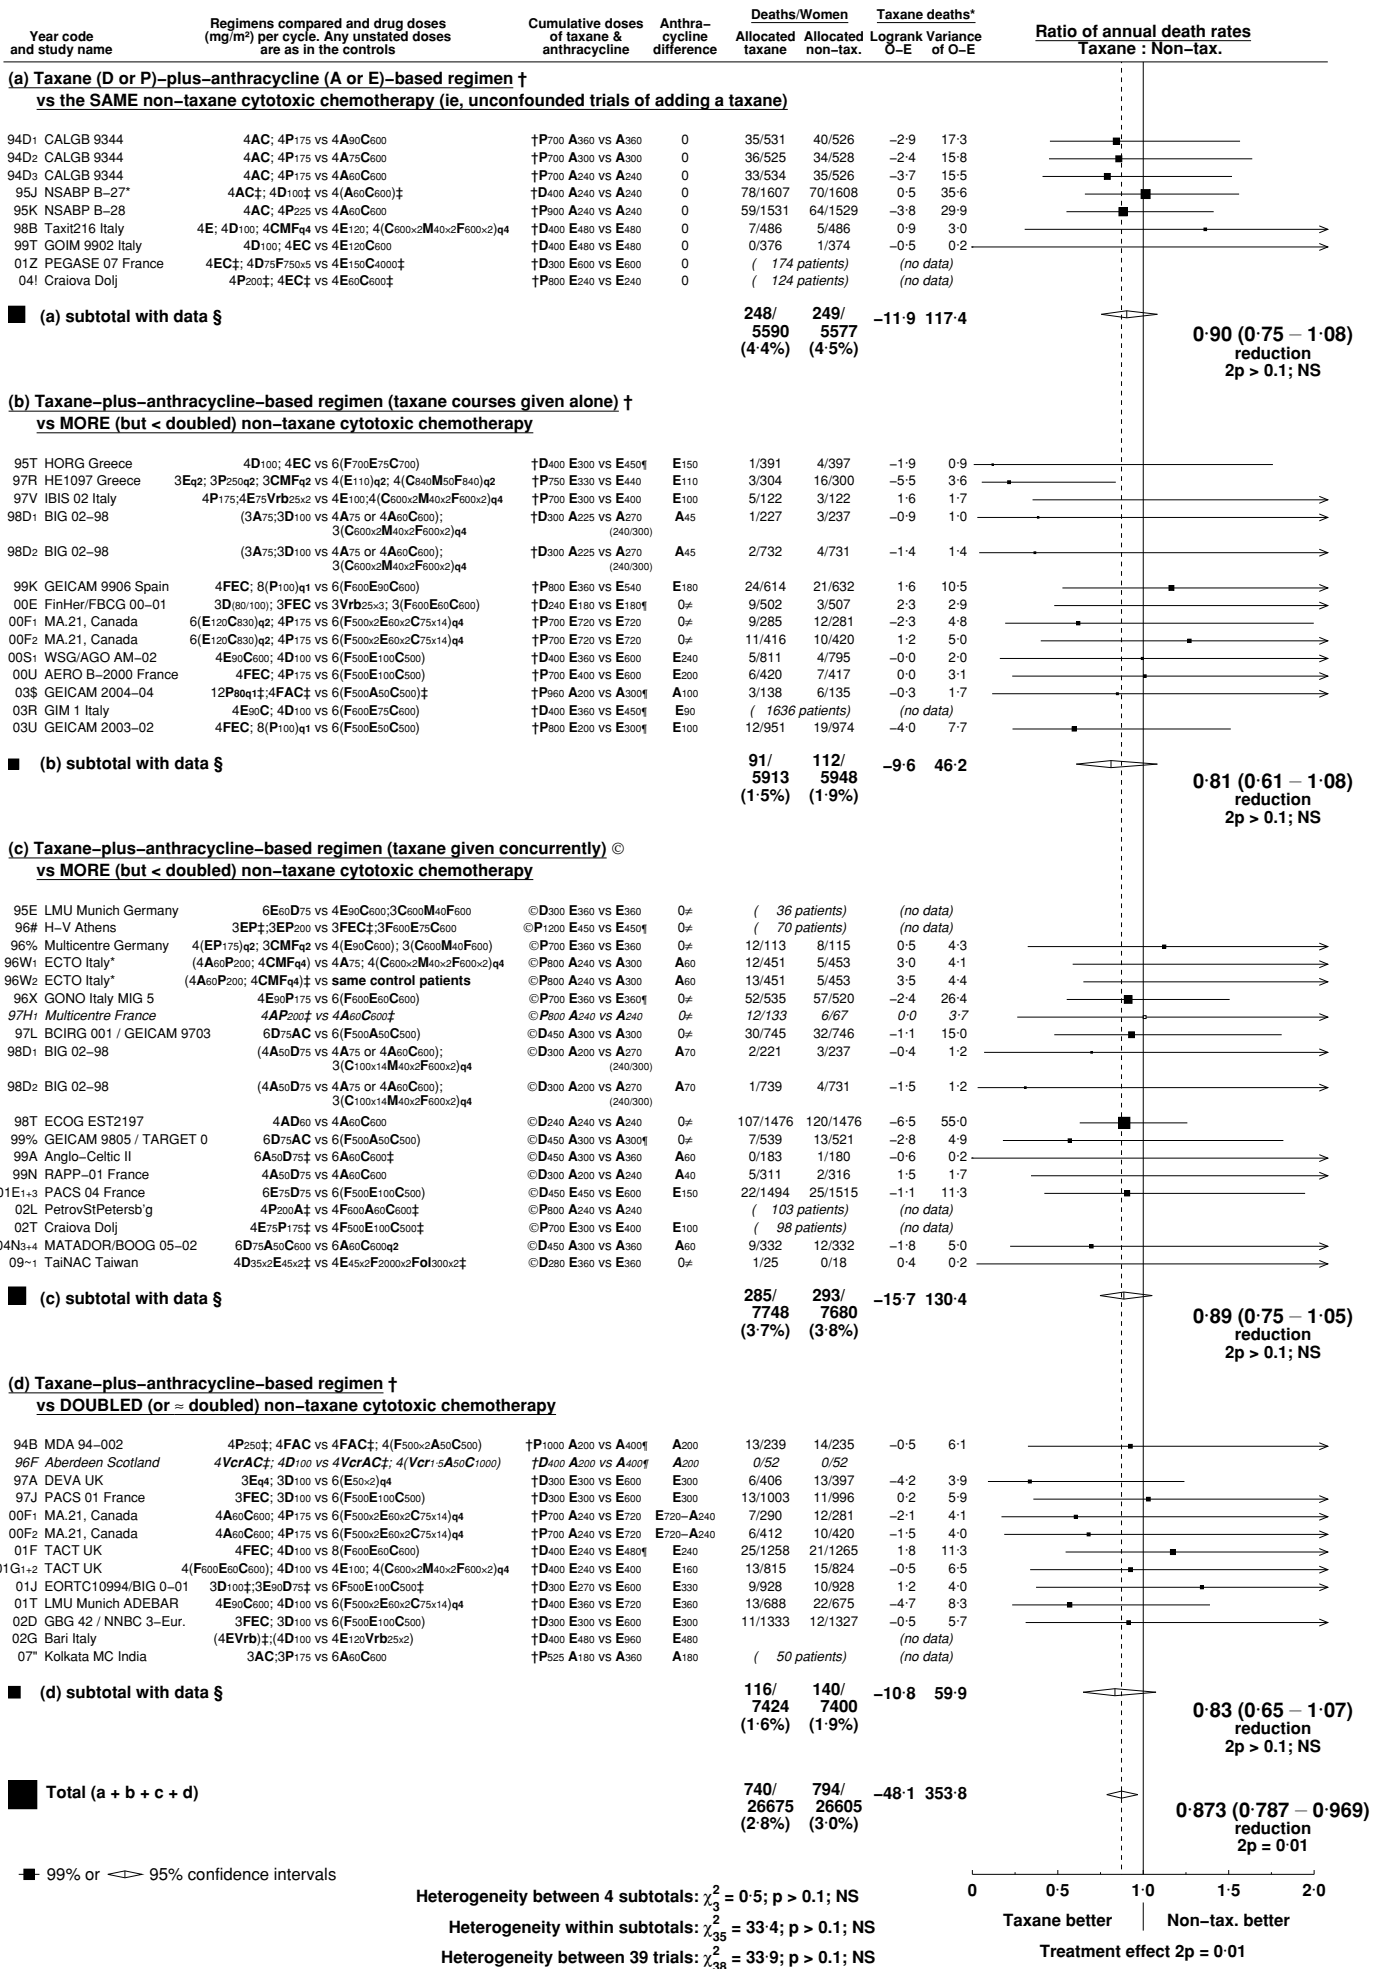

\* For 3-way trials versus the same control patients

† Taxane courses do not overlap with any other chemotherapy courses; hence, total chemotherapy duration is increased

‡ Pre-operative chemotherapy

© Concurrent treatment with taxane and anthracycline; total chemotherapy duration and number of courses not increased

≠ Same cumulative anthracycline dose, but differences in other drugs

¶ Control anthracycline dose less than E90 or A60 per cycle

Taxanes: D = docetaxel; P = paclitaxel. Anthracyclines: A = doxorubicin (Adriamycin); E = Epirubicin. Other agents: C = cyclophosphamide; F = fluorouracil; Fol = folinic acid; M = methotrexate; Vcr = vincristine; Vrb = vinorelbine (Not shown: G-CSF, erythropoietin, trastuzumab, antibiotic, hormonal, local or steroid therapies)

All regimens q3week (unless specified as q1, q2 or q4). Semicolon [:] indicates treatment sequence. x14 means d1-14 po; x2 (x3) means d1, d8 (d15) iv

03S at discretion local investigators could have used epirubicin 100mg/m2 instead of doxorubicin 50mg/m2

P34: All-cause mortality in trials of taxane-plus-anthracycline-based regimen vs same, or more (<doubled or ~doubled) non-taxane cytotoxic chemotherapy

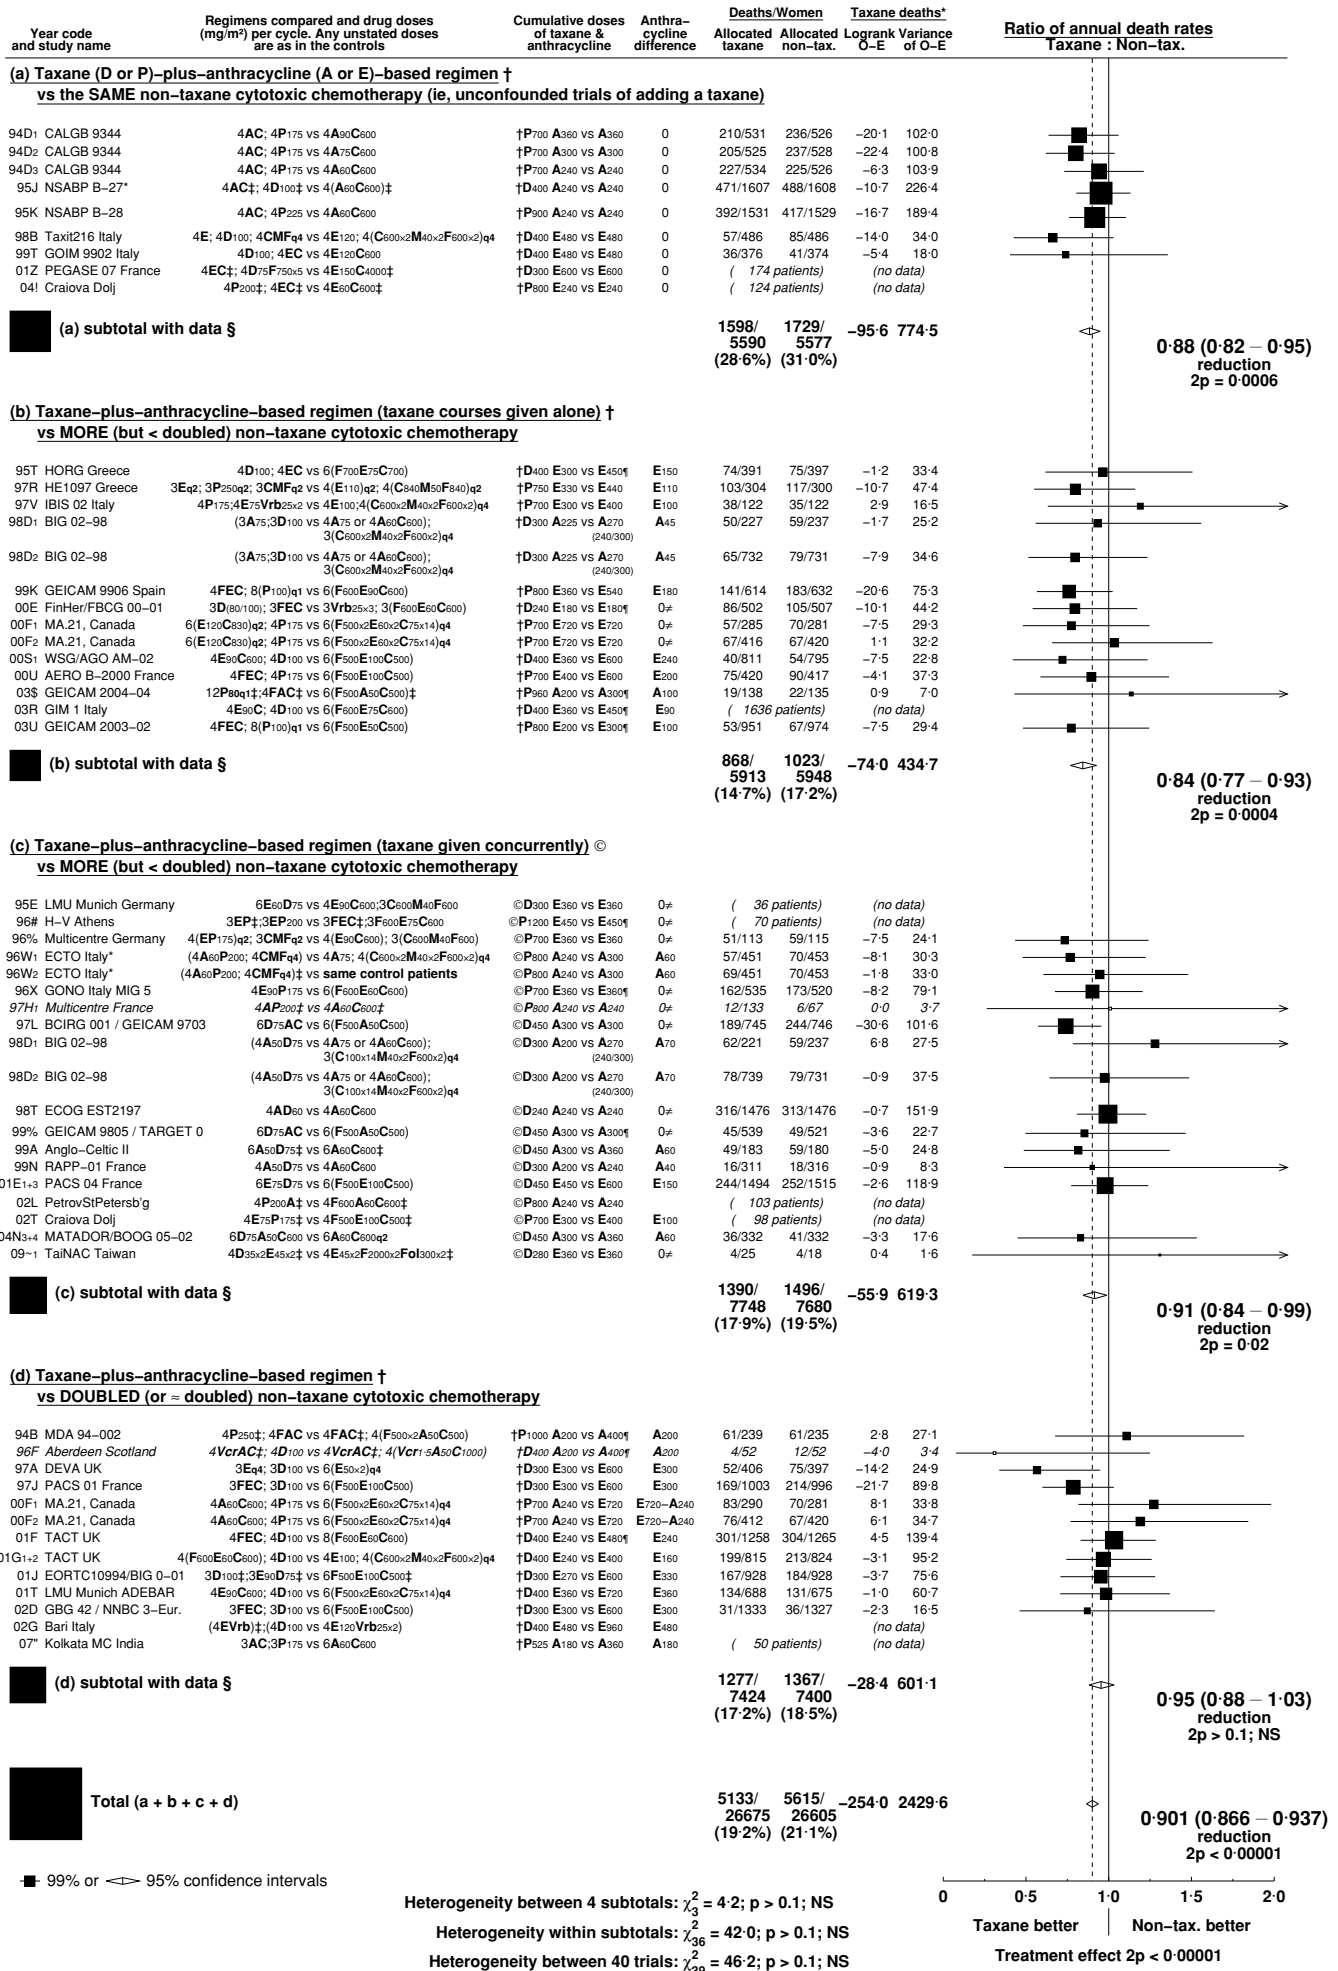

\* For 3-way trials versus the same control patients

† Taxane courses do not overlap with any other chemotherapy courses; hence, total chemotherapy duration is increased

‡ Pre-operative chemotherapy

© Concurrent treatment with taxane and anthracycline; total chemotherapy duration and number of courses not increased

≠ Same cumulative anthracycline dose, but differences in other drugs

¶ Control anthracycline dose less than E90 or A60 per cycle

Taxanes: D = docetaxel; P = paclitaxel. Anthracyclines: A = doxorubicin (Adriamycin); E = Epirubicin. Other agents: C = cyclophosphamide; F = fluorouracil; Fol = folic acid; M = methotrexate; Vcr = vincristine; Vrb = vinorelbine (Not shown: G = CSF, erythropoietin, trastuzumab, antibiotic, hormonal, local or steroid therapies)

All regimens q3week (unless specified as q1, q2 or q4). Semicolon ; indicates treatment sequence. x14 means d1-14 po; x2 (x3) means d1, d8 (d15) iv

03S at discretion local investigators could have used epirubicin 100mg/m2 instead of doxorubicin 50mg/m2

# P35: Breast cancer mortality in trials of taxane-based regimens versus anthracycline-based regimens

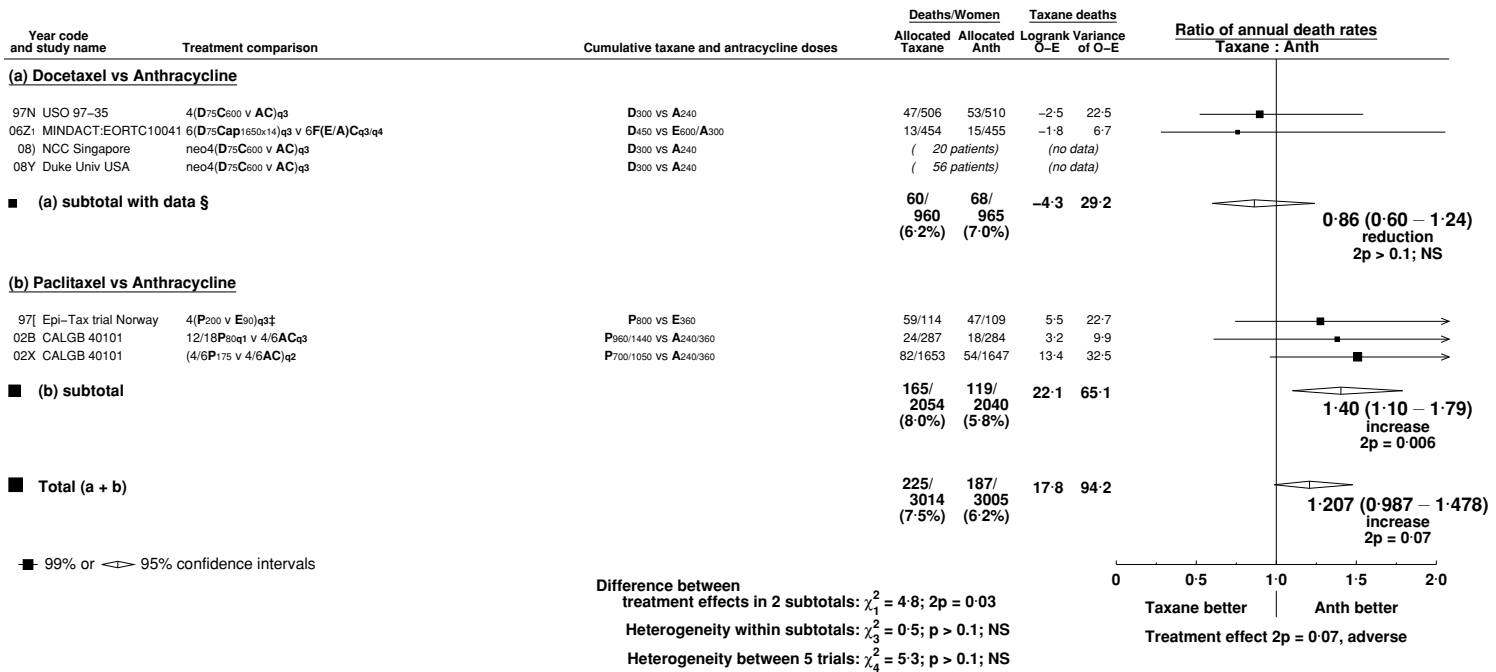

§ 2 trials with no data do not contribute to subtotals or to the overall total.

‡ Pre-operative chemotherapy

Taxanes: D = docetaxel; P = paclitaxel

Anthracyclines: A = doxorubicin (Adriamycin); E = epirubicin

Other agents: C = cyclophosphamide; F = fluorouracil; Cap = capecitabine

P36: Death without recurrence in trials of taxane-based regimens versus anthracycline-based regimens

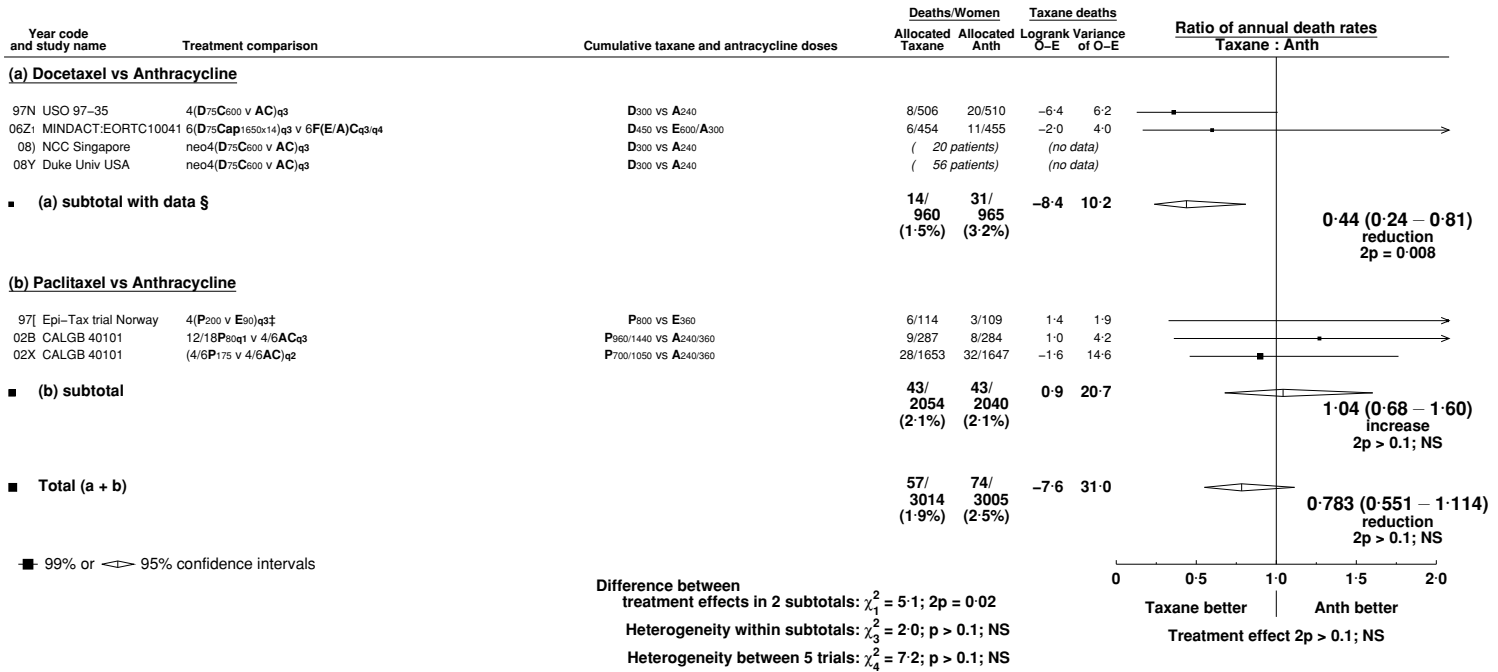

§ 2 trials with no data do not contribute to subtotals or to the overall total.

‡ Pre-operative chemotherapy

Taxanes: D = docetaxel; P = paclitaxel

Anthracyclines: A = doxorubicin (Adriamycin); E = epirubicin

Other agents: C = cyclophosphamide; F = fluorouracil; Cap = capecitabine

# P37: All-cause mortality in trials of taxane-based regimens versus anthracycline-based regimens

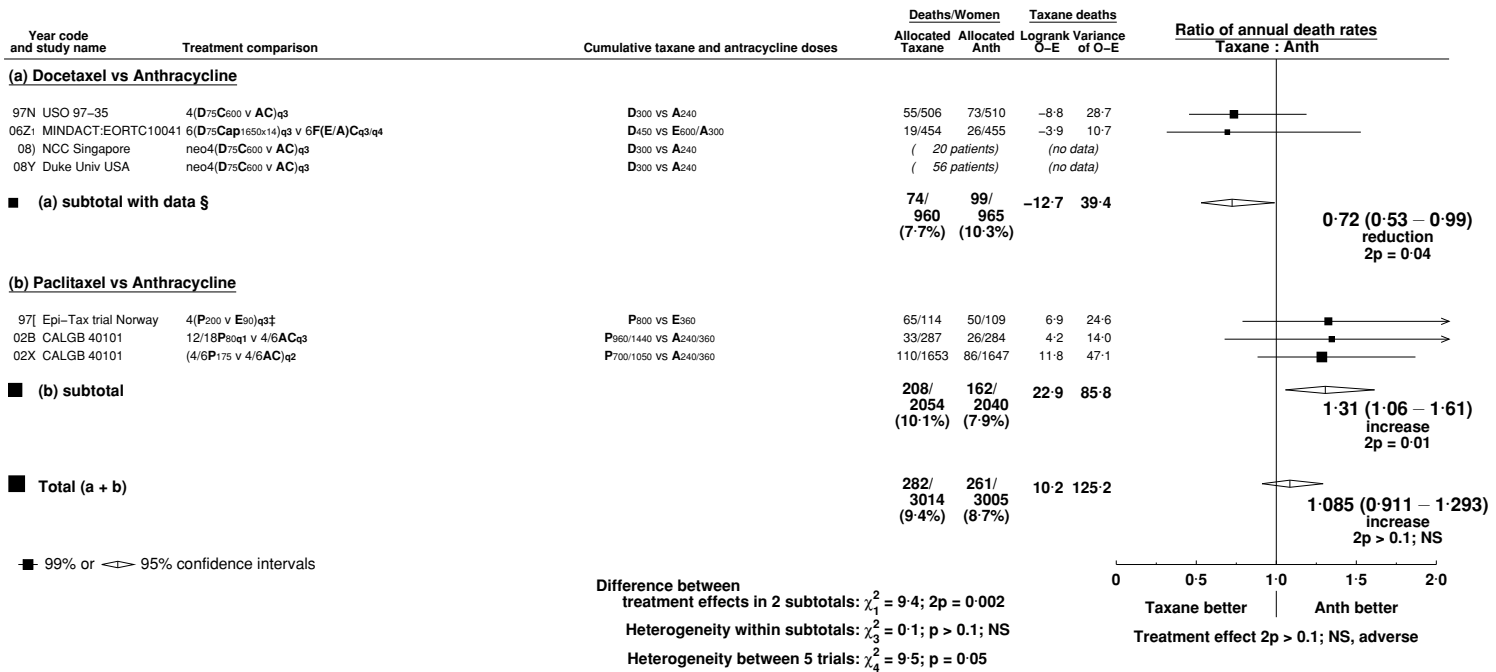

§ 2 trials with no data do not contribute to subtotals or to the overall total.

‡ Pre-operative chemotherapy

Taxanes: D = docetaxel; P = paclitaxel

Anthracyclines: A = doxorubicin (Adriamycin); E = epirubicin

Other agents: C = cyclophosphamide; F = fluorouracil; Cap = capecitabine

# P38: Breast cancer mortality in trials of Docetaxel versus Paclitaxel

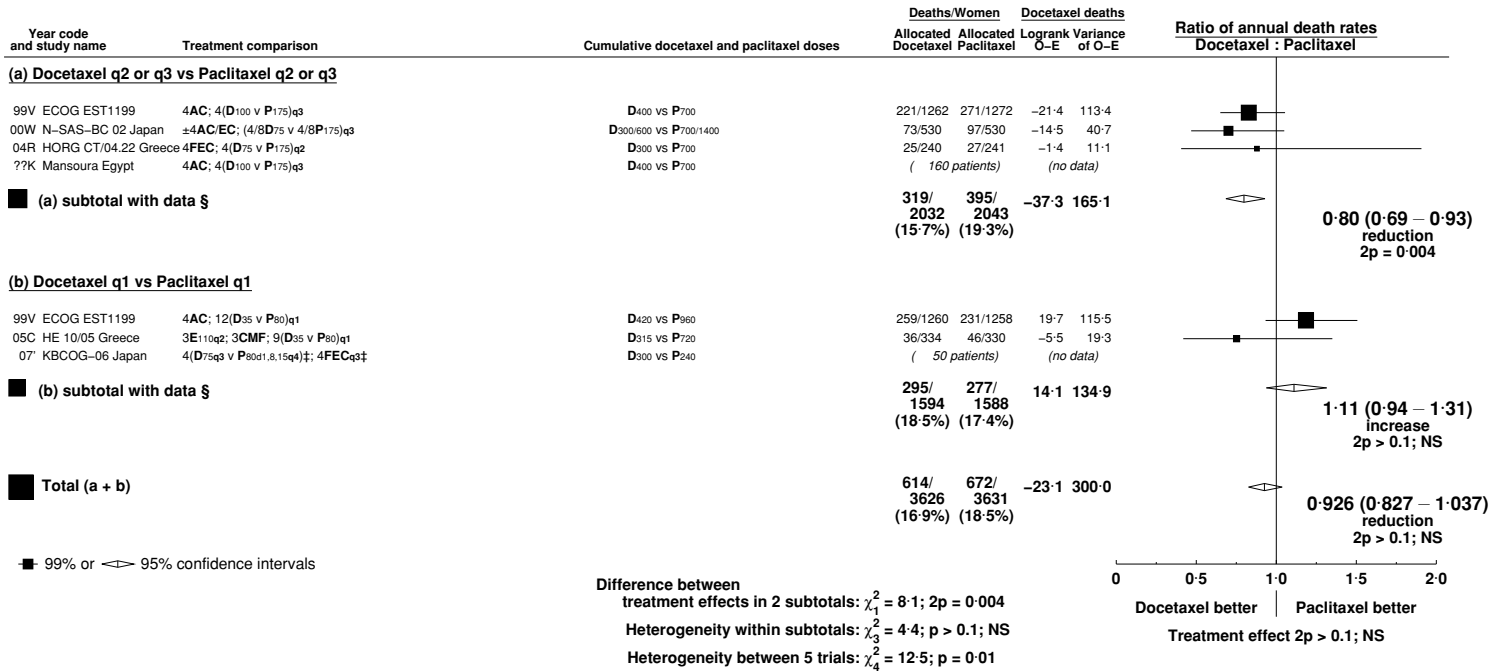

§ 2 trials with no data do not contribute to subtotals or to the overall total.

‡ Pre-operative chemotherapy  
Taxanes: D = docetaxel; P = paclitaxel  
Anthracyclines: A = doxorubicin (Adriamycin); E = epirubicin  
Other agents: C = cyclophosphamide; F = fluorouracil

# P39: Death without recurrence in trials of Docetaxel versus Paclitaxel

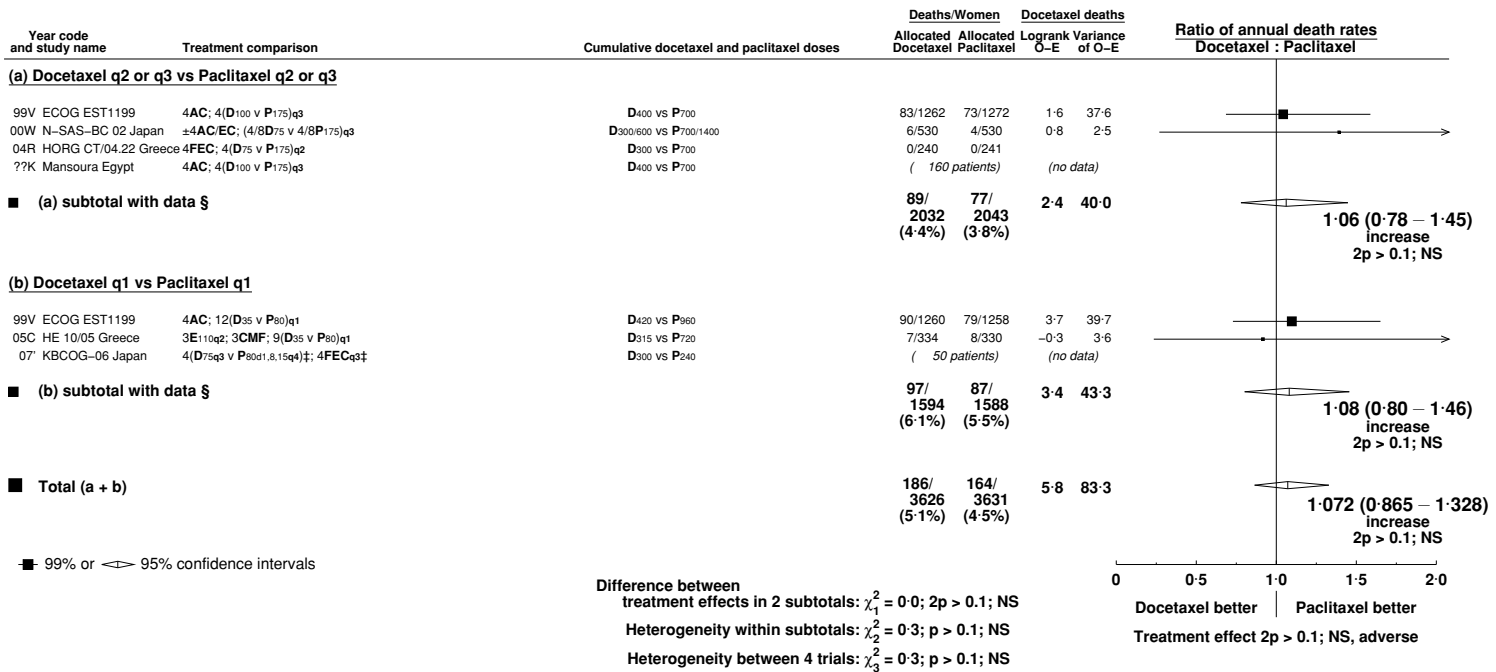

§ 2 trials with no data do not contribute to subtotals or to the overall total.

‡ Pre-operative chemotherapy

Taxanes: D = docetaxel; P = paclitaxel

Anthracyclines: A = doxorubicin (Adriamycin); E = epirubicin

Other agents: C = cyclophosphamide; F = fluorouracil

# P40: All-cause mortality in trials of Docetaxel versus Paclitaxel

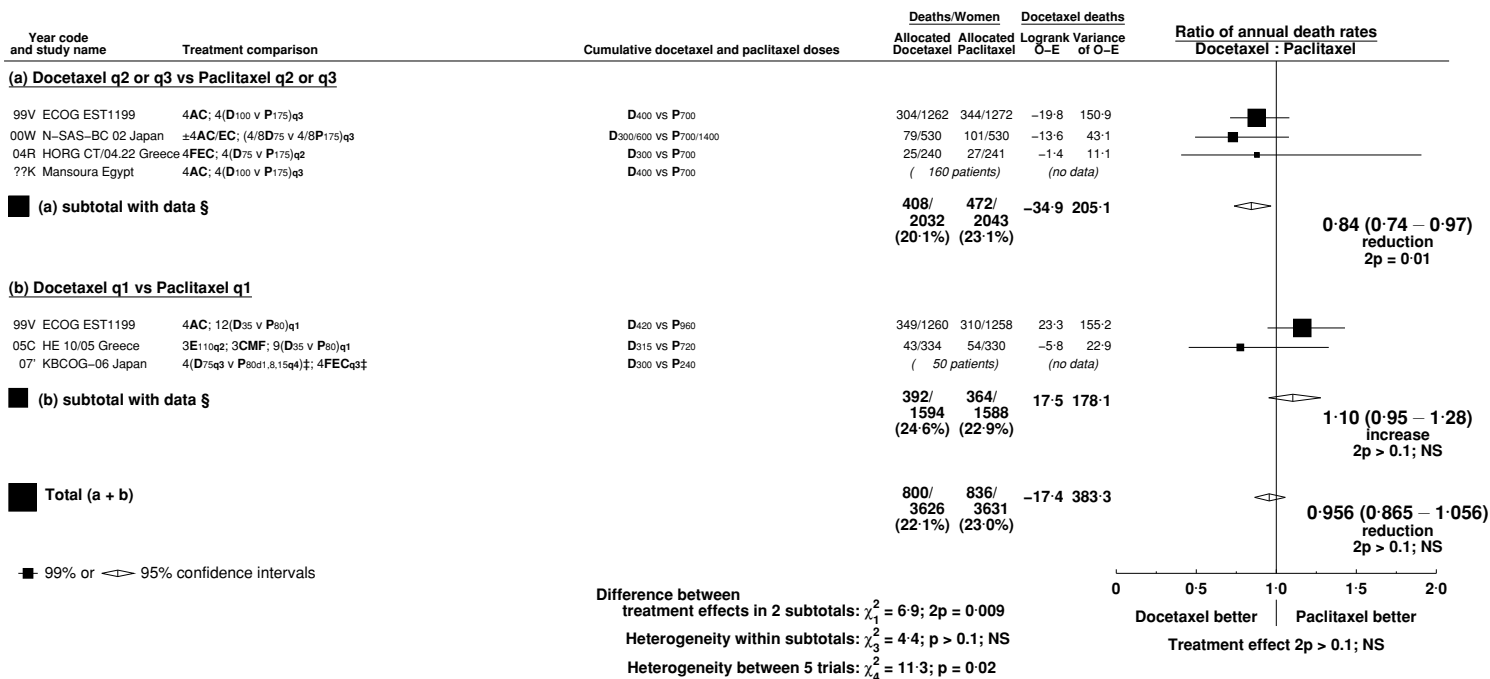

§ 2 trials with no data do not contribute to subtotals or to the overall total.

‡ Pre-operative chemotherapy

Taxanes: D = docetaxel; P = paclitaxel

Anthracyclines: A = doxorubicin (Adriamycin); E = epirubicin

Other agents: C = cyclophosphamide; F = fluorouracil



P41: Breast cancer mortality in trials comparing similar cumulative dose taxane chemotherapy delivered in smaller vs larger fractions

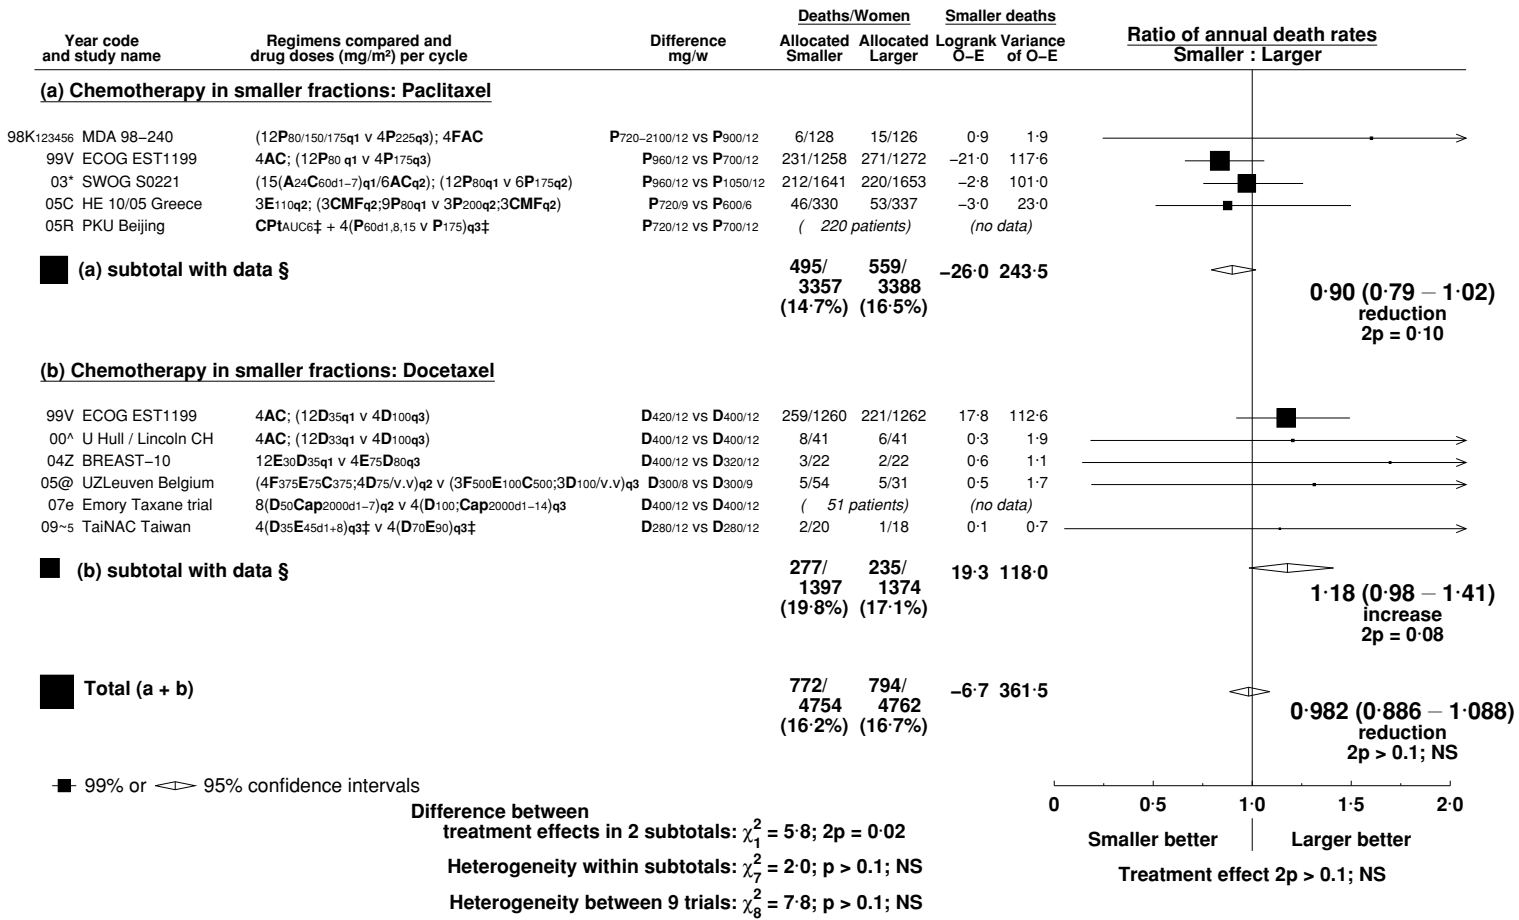

§ 2 trials with no data do not contribute to subtotals or to the overall total.

‡ Pre-operative chemotherapy

v.v Vice versa

Taxanes: D = docetaxel; P = paclitaxel

Anthracyclines: A = doxorubicin (Adriamycin); E = epirubicin

Other agents: C = cyclophosphamide; F = fluorouracil; M = methotrexate; Cap = capecitabine; Cpt = carboplatin

P42: Death without recurrence in trials comparing similar cumulative dose taxane chemotherapy delivered in smaller vs larger fractions

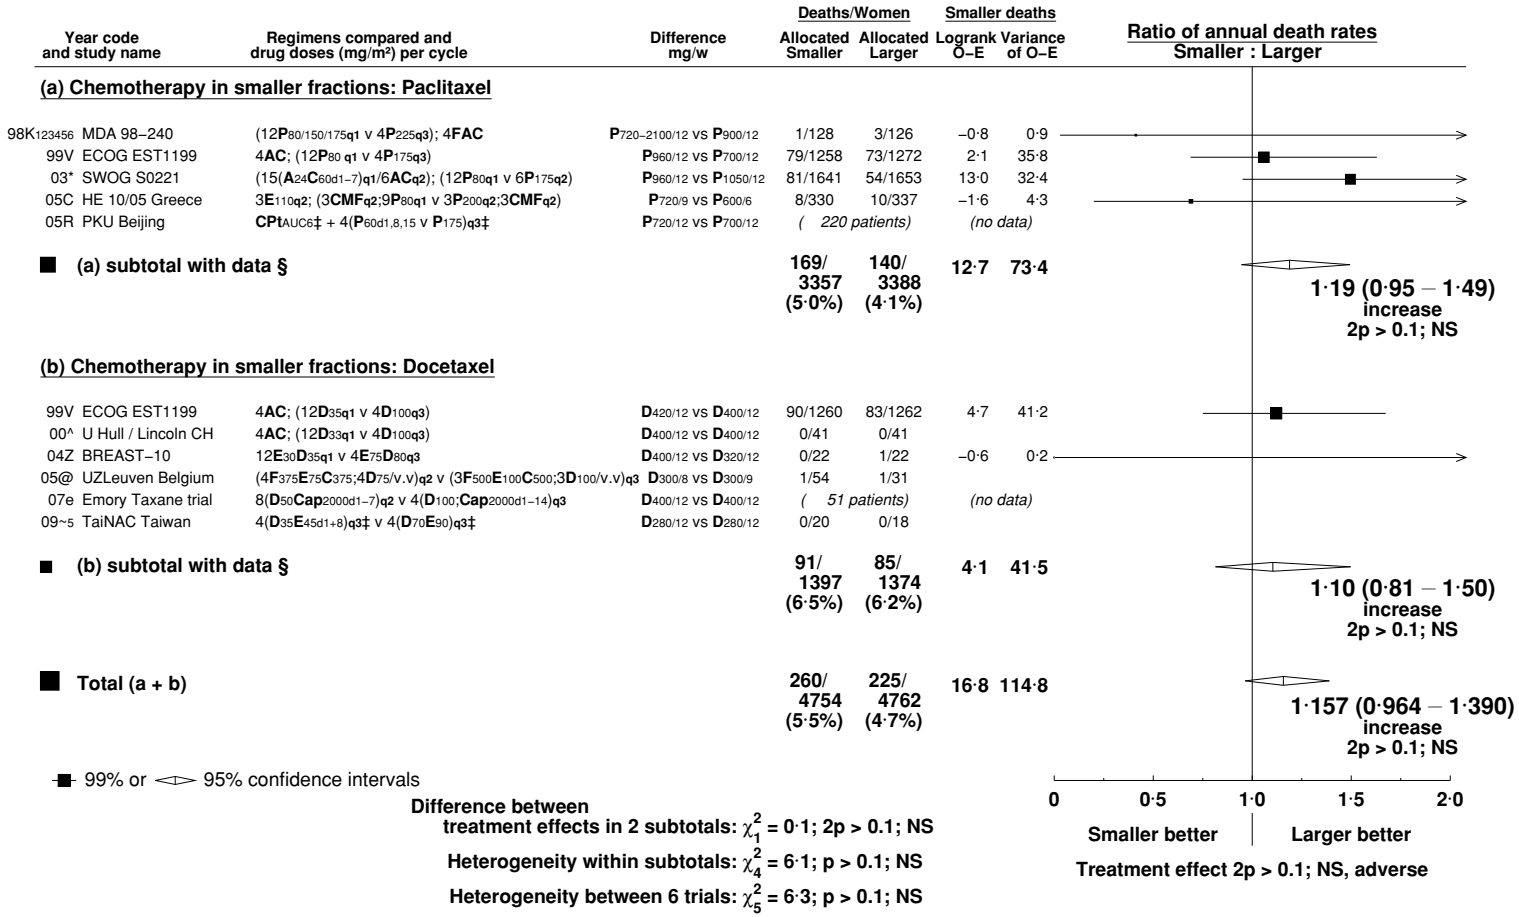

§ 2 trials with no data do not contribute to subtotals or to the overall total.

‡ Pre-operative chemotherapy v.v Vice versa

Taxanes: D = docetaxel; P = paclitaxel

Anthracyclines: A = doxorubicin (Adriamycin); E = epirubicin

Other agents: C = cyclophosphamide; F = fluorouracil; M = methotrexate; Cap = capecitabine; Cpt = carboplatin

P43: All-cause mortality in trials comparing similar cumulative dose taxane chemotherapy delivered in smaller vs larger fractions

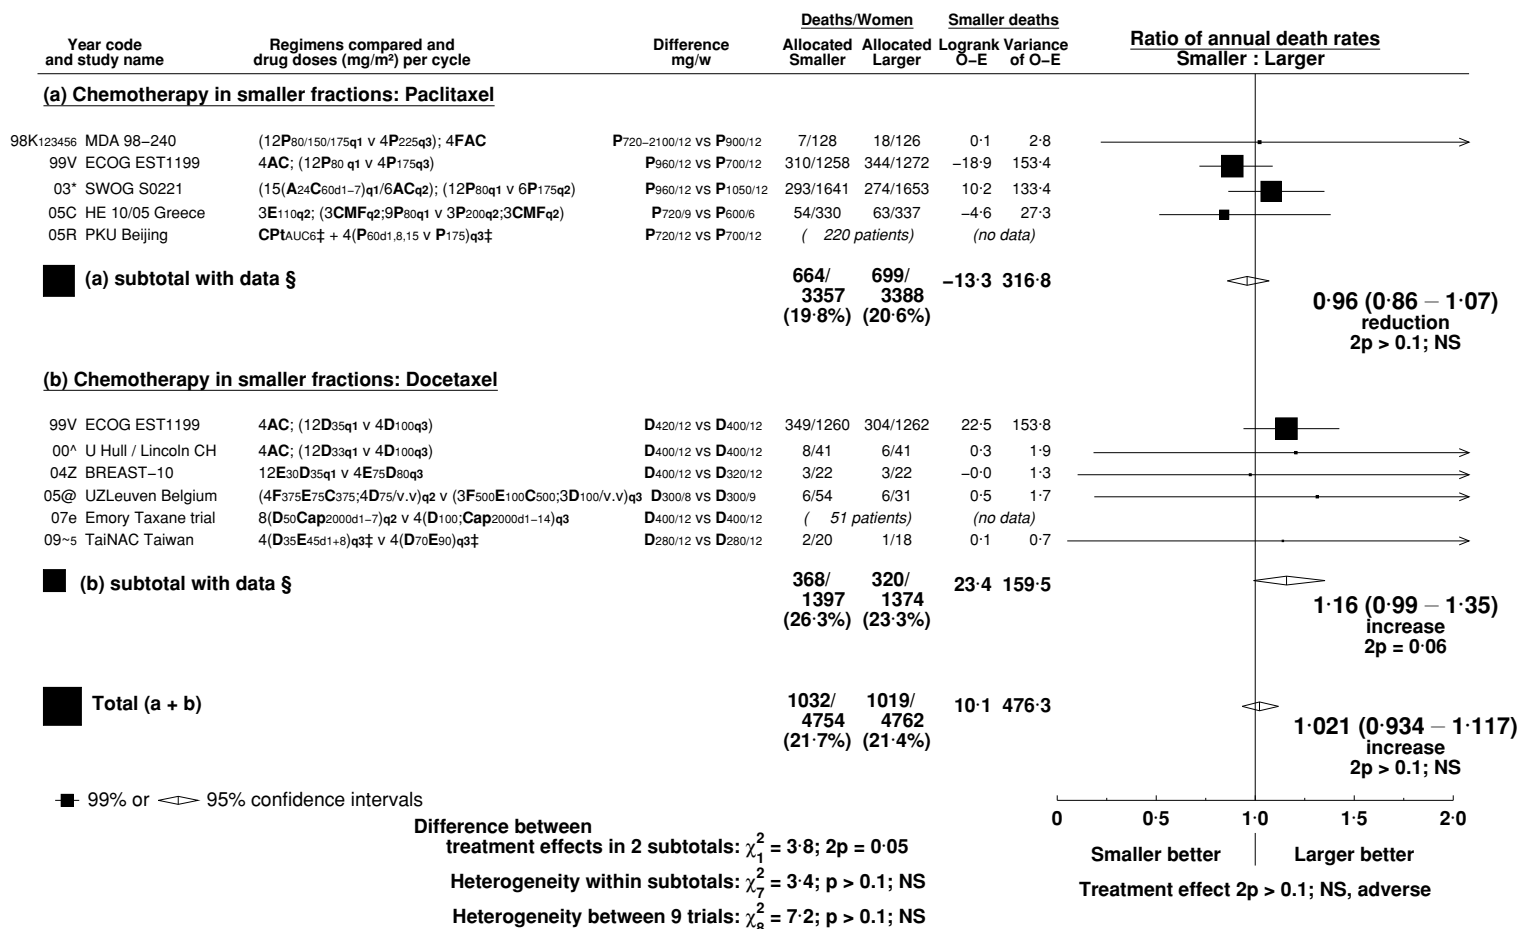

§ 2 trials with no data do not contribute to subtotals or to the overall total.

‡ Pre-operative chemotherapy

v.v Vice versa

Taxanes: D = docetaxel; P = paclitaxel

Anthracyclines: A = doxorubicin (Adriamycin); E = epirubicin

Other agents: C = cyclophosphamide; F = fluorouracil; M = methotrexate; Cap = capecitabine; Cpt = carboplatin

P44: Breast cancer mortality in trials comparing sequencing order of anthracycline and taxane chemotherapy

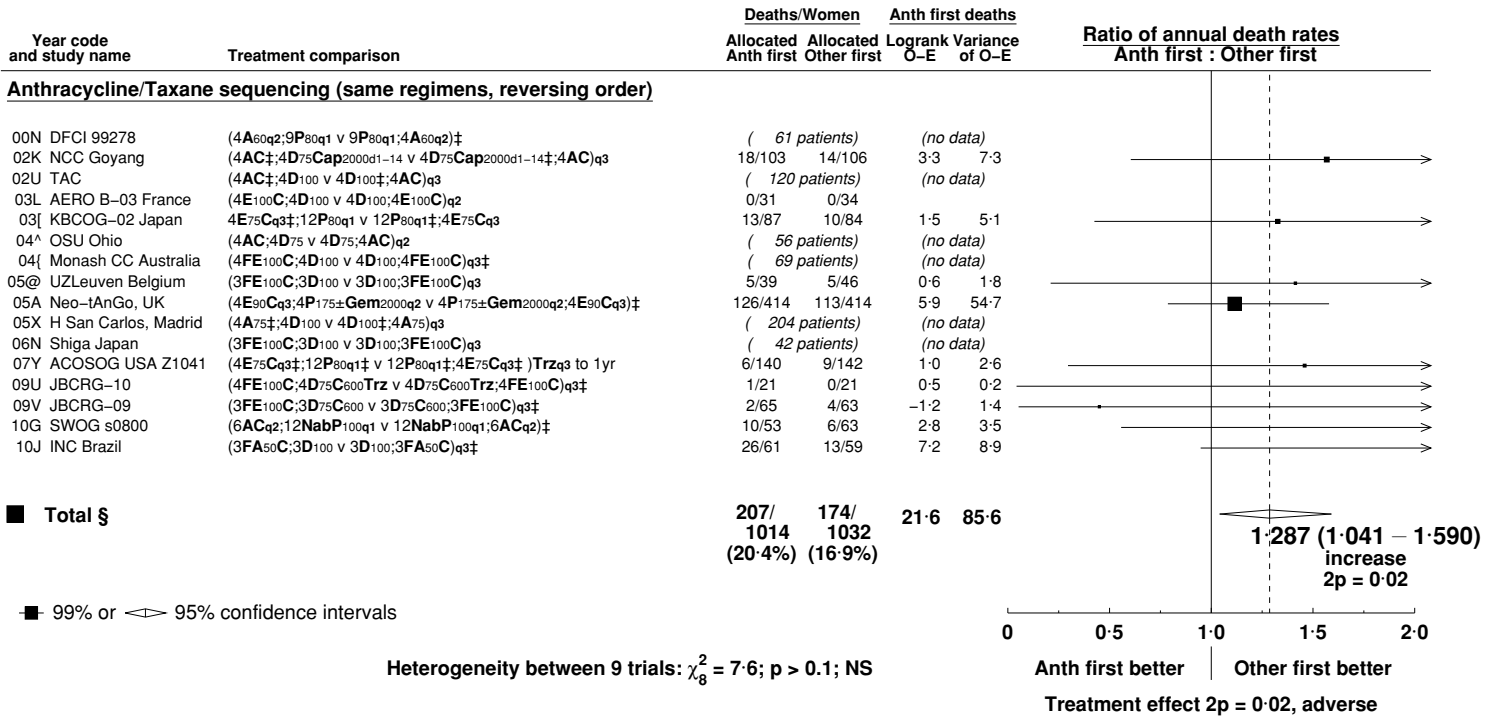

§ 6 trials with no data do not contribute to the total.

‡ Pre-operative chemotherapy

Taxanes: D = docetaxel; P = paclitaxel

Anthracyclines: A = doxorubicin (Adriamycin); E = epirubicin

Other agents: C = cyclophosphamide; F = fluorouracil; M = methotrexate; Trz = trastuzumab; Cap = capecitabine; Gem = gemcitabine; NabP = Nab paclitaxel

P45: Death without recurrence in trials comparing sequencing order of anthracycline and taxane chemotherapy

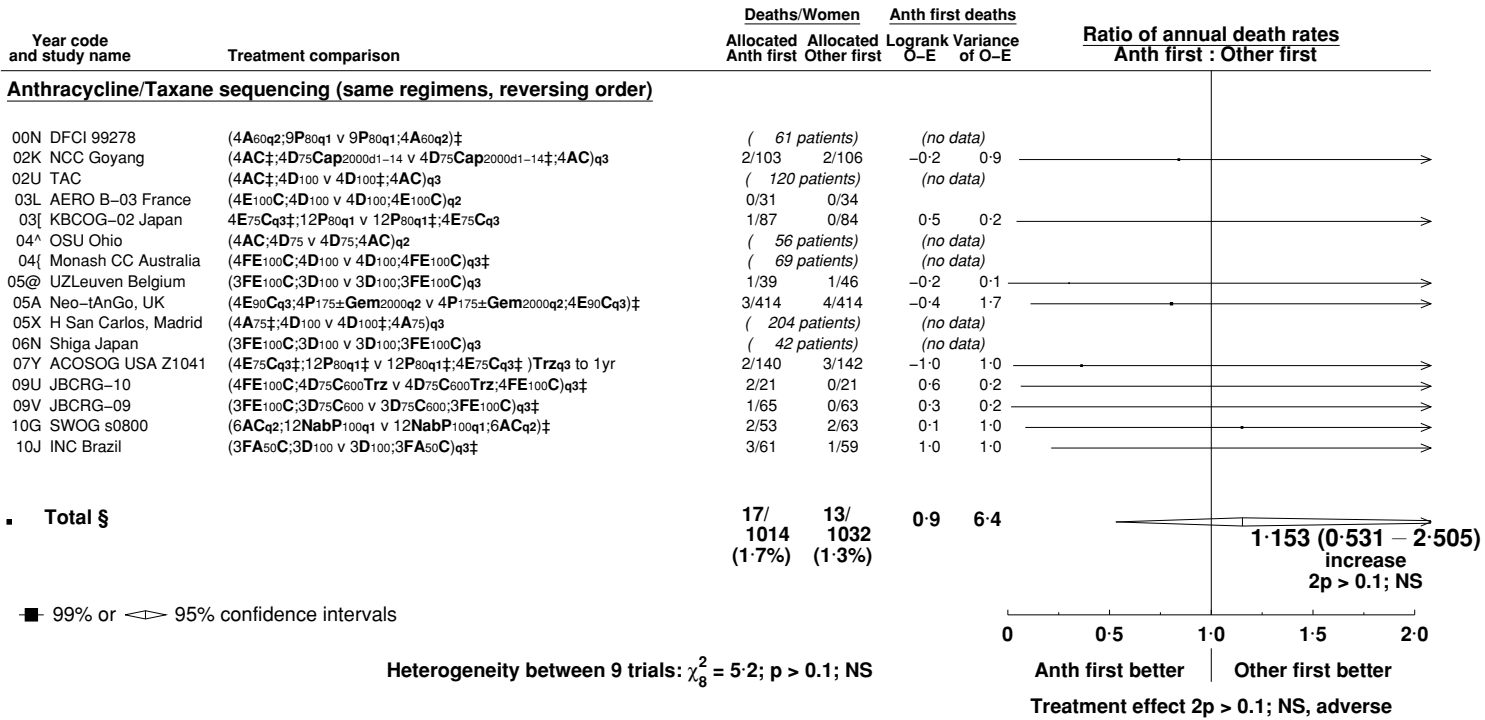

§ 6 trials with no data do not contribute to the total.

‡ Pre-operative chemotherapy

Taxanes: D = docetaxel; P = paclitaxel

Anthracyclines: A = doxorubicin (Adriamycin); E = epirubicin

Other agents: C = cyclophosphamide; F = fluorouracil; M = methotrexate; Trz = trastuzumab; Cap = capecitabine; Gem = gemcitabine; NabP = Nab paclitaxel

P46: All-cause mortality in trials comparing sequencing order of anthracycline and taxane chemotherapy

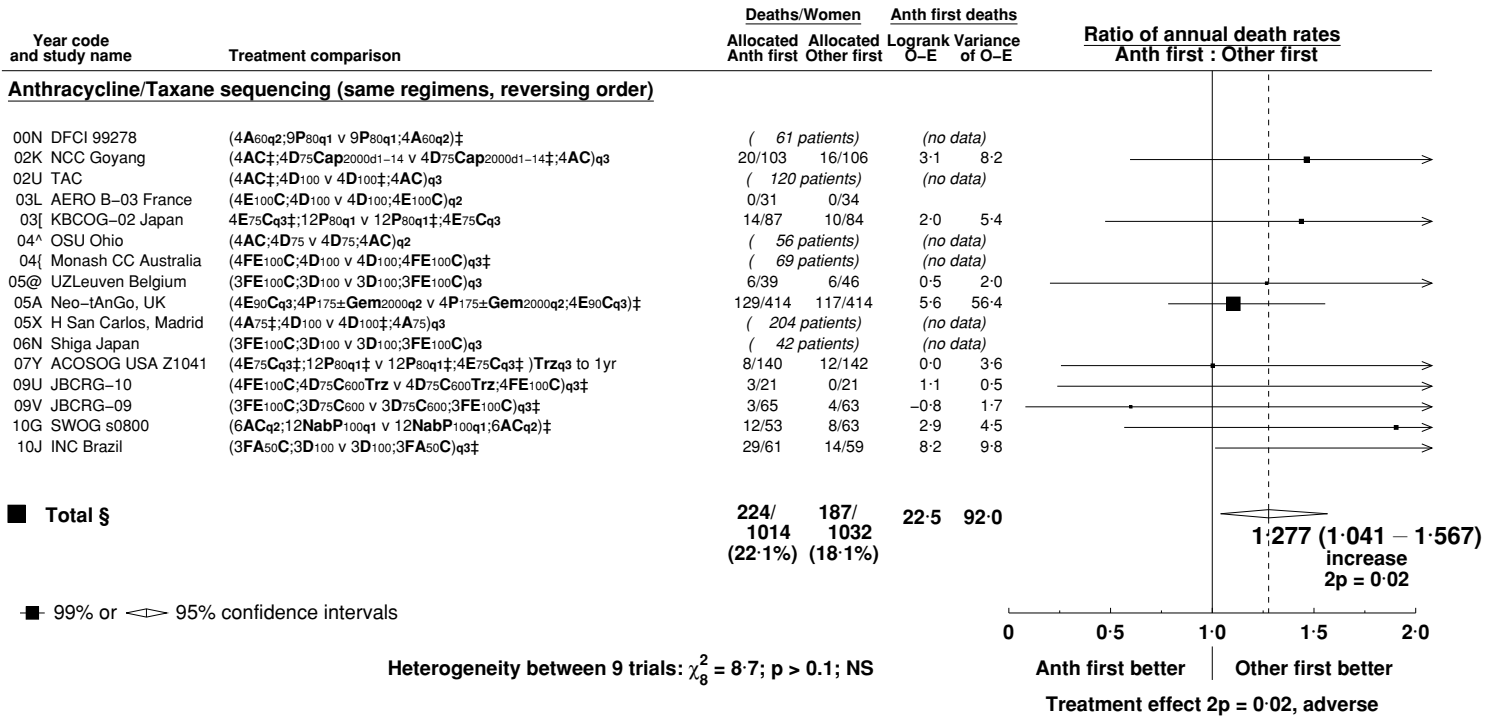

§ 6 trials with no data do not contribute to the total.

‡ Pre-operative chemotherapy

Taxanes: D = docetaxel; P = paclitaxel

Anthracyclines: A = doxorubicin (Adriamycin); E = epirubicin

Other agents: C = cyclophosphamide; F = fluorouracil; M = methotrexate; Trz = trastuzumab; Cap = capecitabine; Gem = gemcitabine; NabP = Nab paclitaxel

# P47: Breast cancer mortality in trials of longer versus shorter anthracycline/taxane regimens

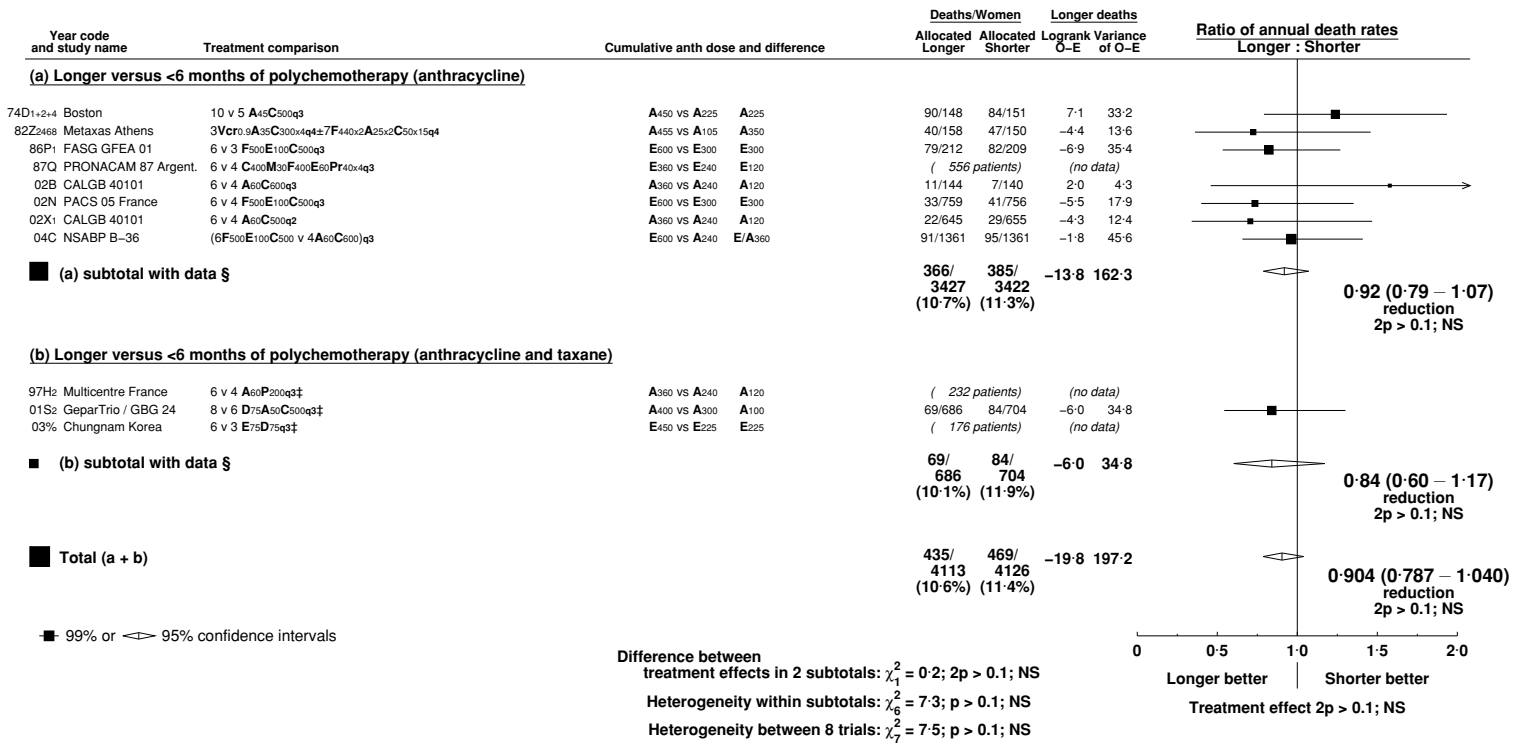

§ 3 trials with no data do not contribute to subtotals or to the overall total.

‡ Pre-operative chemotherapy

Taxanes: D = docetaxel; P = paclitaxel

Anthracyclines: A = doxorubicin (Adriamycin); E = epirubicin

Other agents: C = cyclophosphamide; F = fluorouracil; M = methotrexate; Pr = prednisone; Vcr = vincristine

# P48: Death without recurrence in trials of longer versus shorter athracycline/taxane regimens

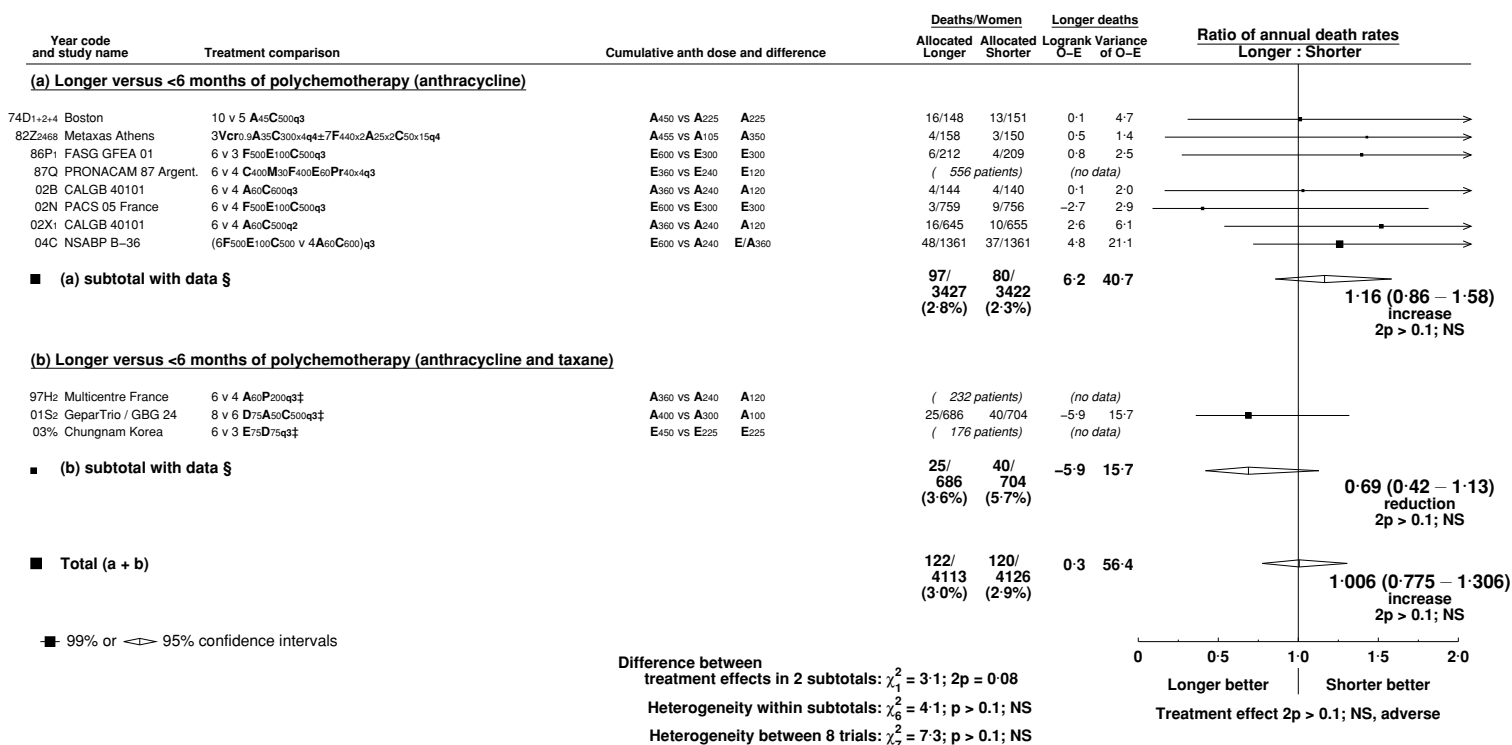

§ 3 trials with no data do not contribute to subtotals or to the overall total.

‡ Pre-operative chemotherapy

Taxanes: D = docetaxel; P = paclitaxel

Anthracyclines: A = doxorubicin (Adriamycin); E = epirubicin

Other agents: C = cyclophosphamide; F = fluorouracil; M = methotrexate; Pr = prednisone; Vcr = vincristine



# P49: All-cause mortality in trials of longer versus shorter athracycline/taxane regimens

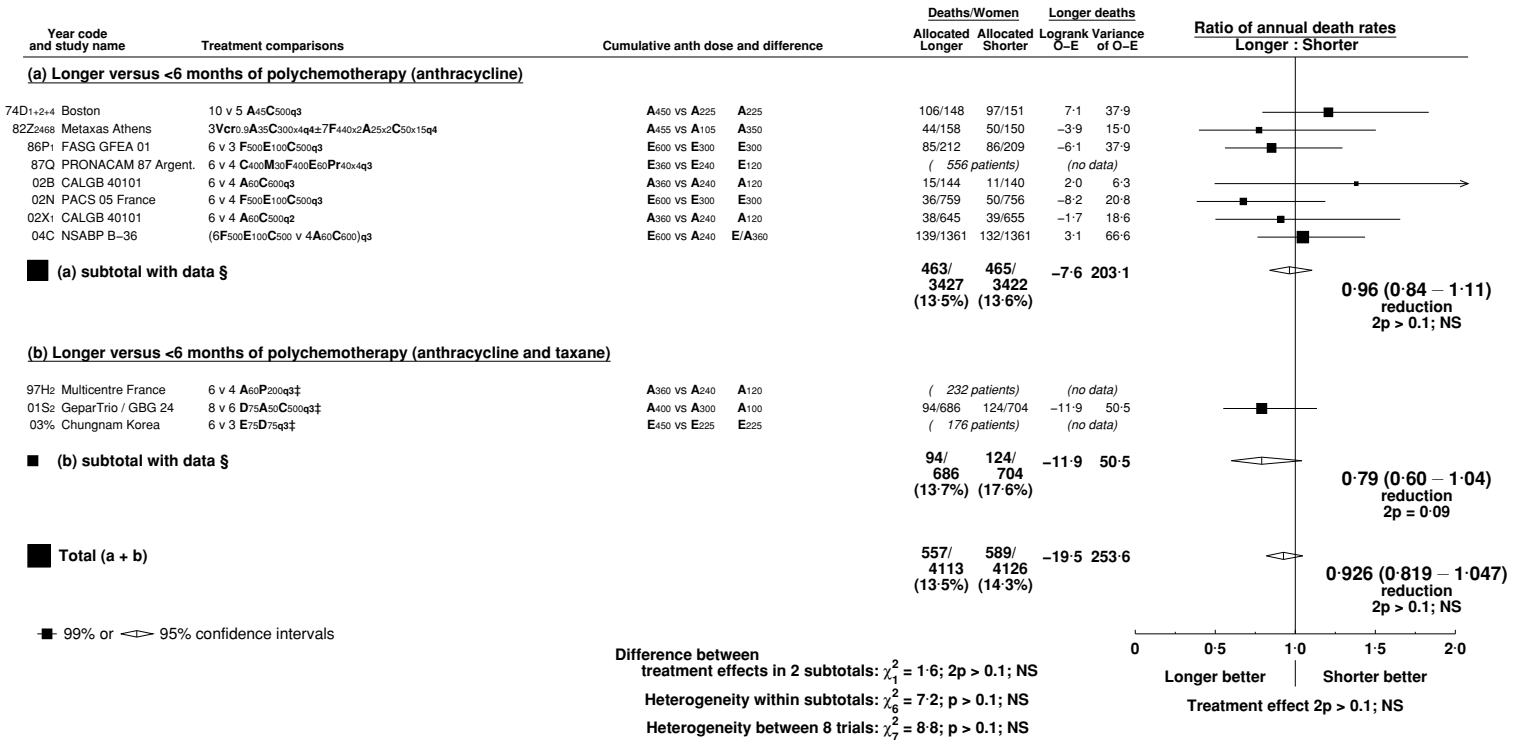

§ 3 trials with no data do not contribute to subtotals or to the overall total.

## ‡ Pre-operative chemotherapy

Taxanes: D = docetaxel; P = paclitaxel

Anthracyclines: A = doxorubicin (Adriamycin); E = epirubicin

Other agents: C = cyclophosphamide; F = fluorouracil; M = methotrexate; Pr = prednisone; Vcr = vincristine

# P50: Breast cancer mortality in trials of higher versus lower anthracycline dose

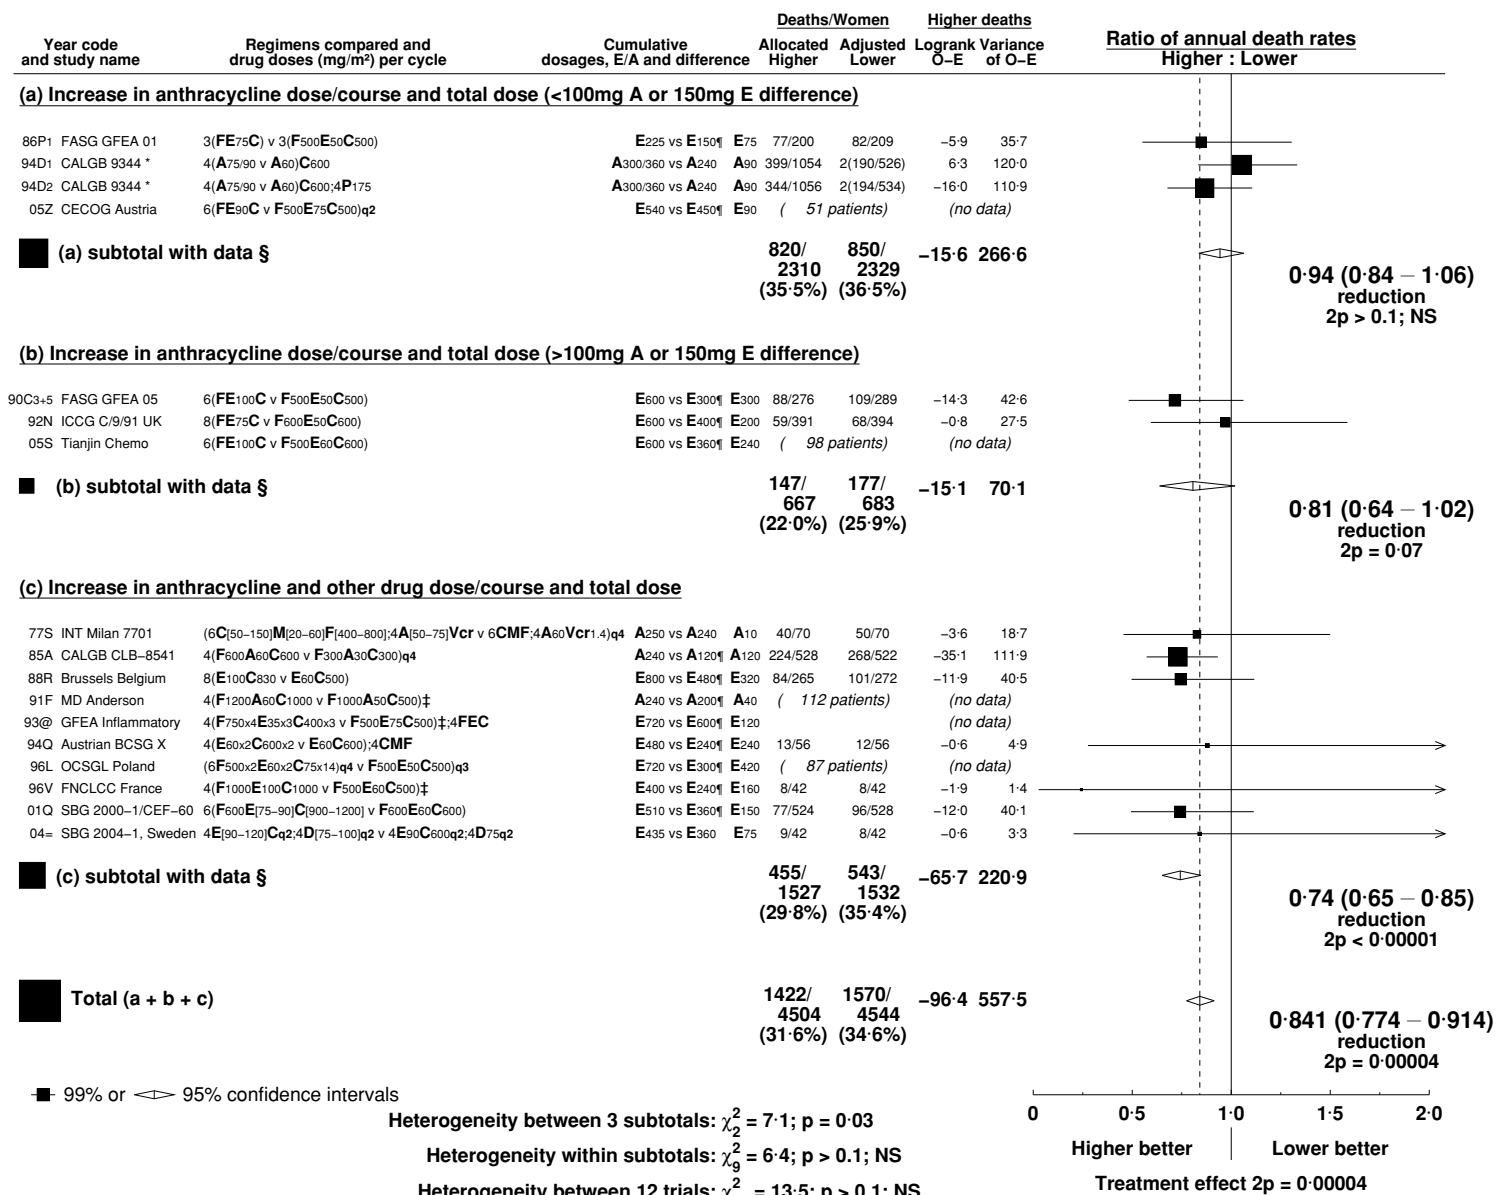

§ 5 trials with no data do not contribute to subtotals or to the overall total.

\* For balance, control patients in 3-way trials or trial strata count half or twice in subtotal(s) and in final total of deaths/patients.

‡ Pre-operative chemotherapy

¶ Control anthracycline dose less than E90 or A60 per cycle

Taxanes: D = docetaxel; P = paclitaxel. Anthracyclines: A = doxorubicin (Adriamycin); E = Epirubicin.

Other agents: C = cyclophosphamide; F = fluorouracil; M = methotrexate; Vcr = vincristine

All regimens q3week (unless specified as q1, q2 or q4). Semicolon [:] indicates treatment sequence. x14 means d1-14 po; x(2x3) means d1, d8 (d15) iv

77S in control arm dose for CMF are C100M40F600

# P51: Death without recurrence in trials of higher versus lower anthracycline dose

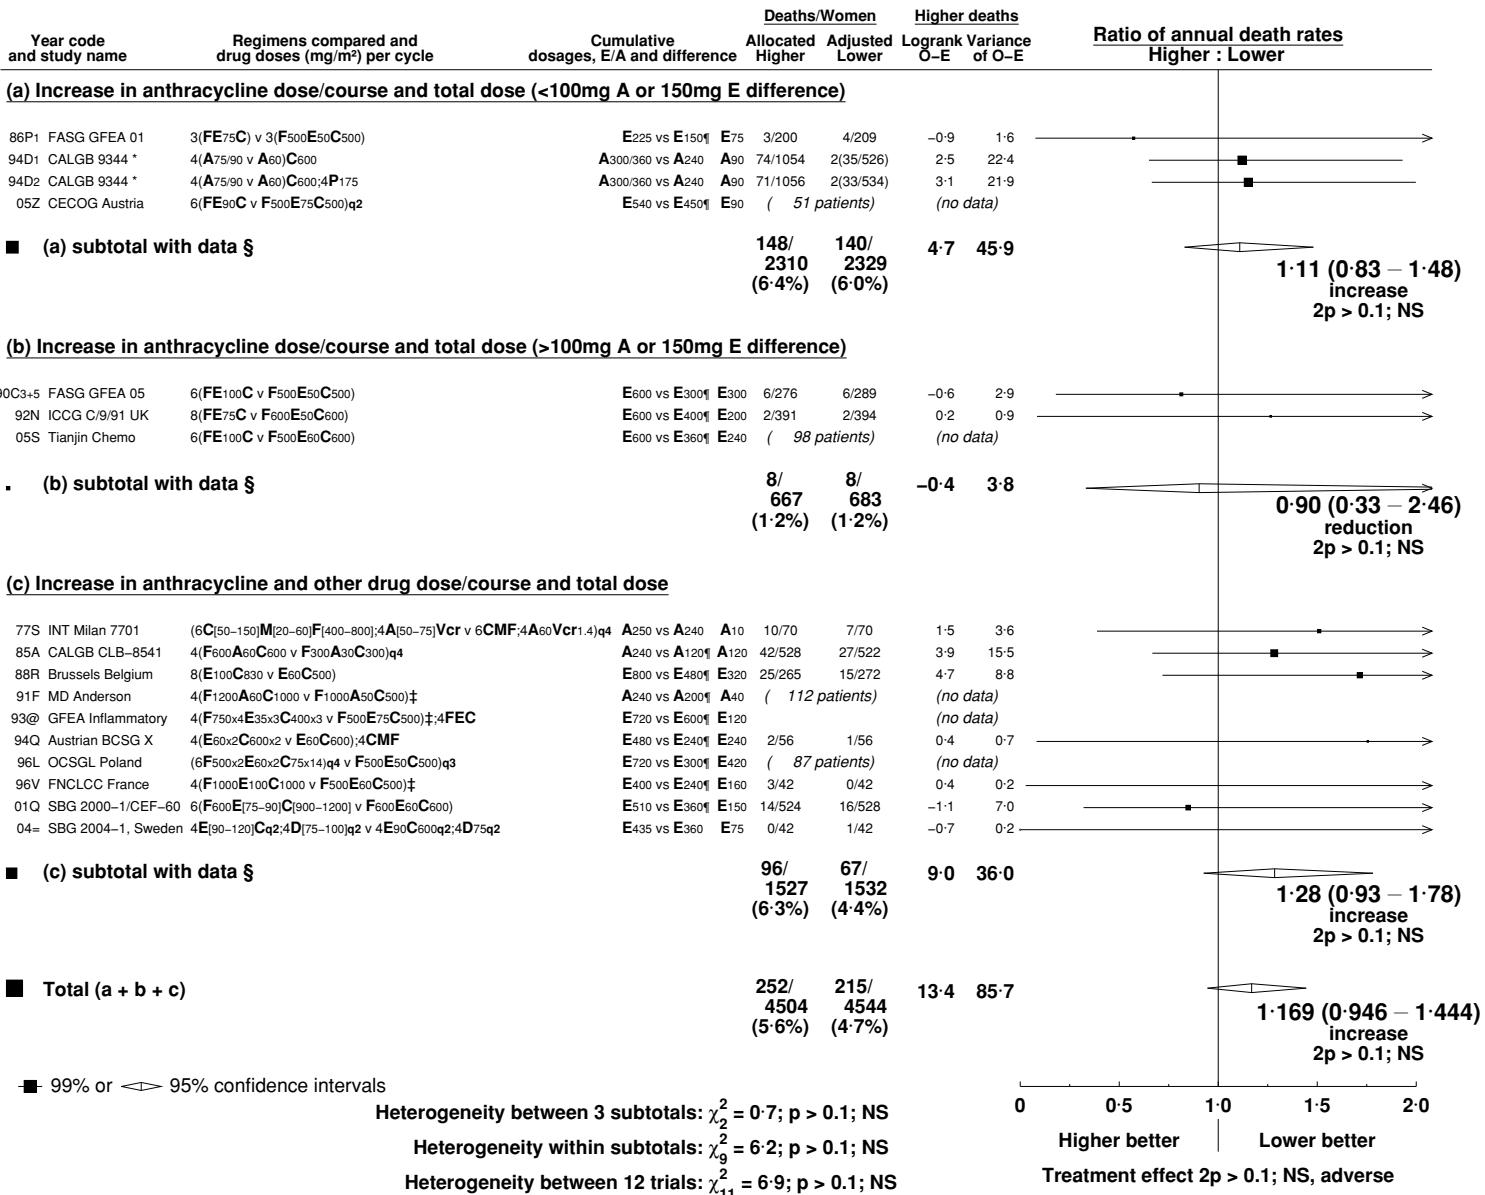

§ 5 trials with no data do not contribute to subtotals or to the overall total.

\* For balance, control patients in 3-way trials or trial strata count half or twice in subtotal(s) and in final total of deaths/patients.

‡ Pre-operative chemotherapy

¶ Control anthracycline dose less than E90 or A60 per cycle

Taxanes: D = docetaxel; P = paclitaxel. Anthracyclines: A = doxorubicin (Adriamycin); E = Epirubicin.

Other agents: C = cyclophosphamide; F = fluorouracil; M = methotrexate; Vcr = vincristine

All regimens q3week (unless specified as q1, q2 or q4). Semicolon ; indicates treatment sequence. x14 means d1-14 po; x2 (x3) means d1, d8 (d15) iv

77S in control arm dose for CMF are C100M40F600

# P52: All-cause mortality in trials of higher versus lower anthracycline dose

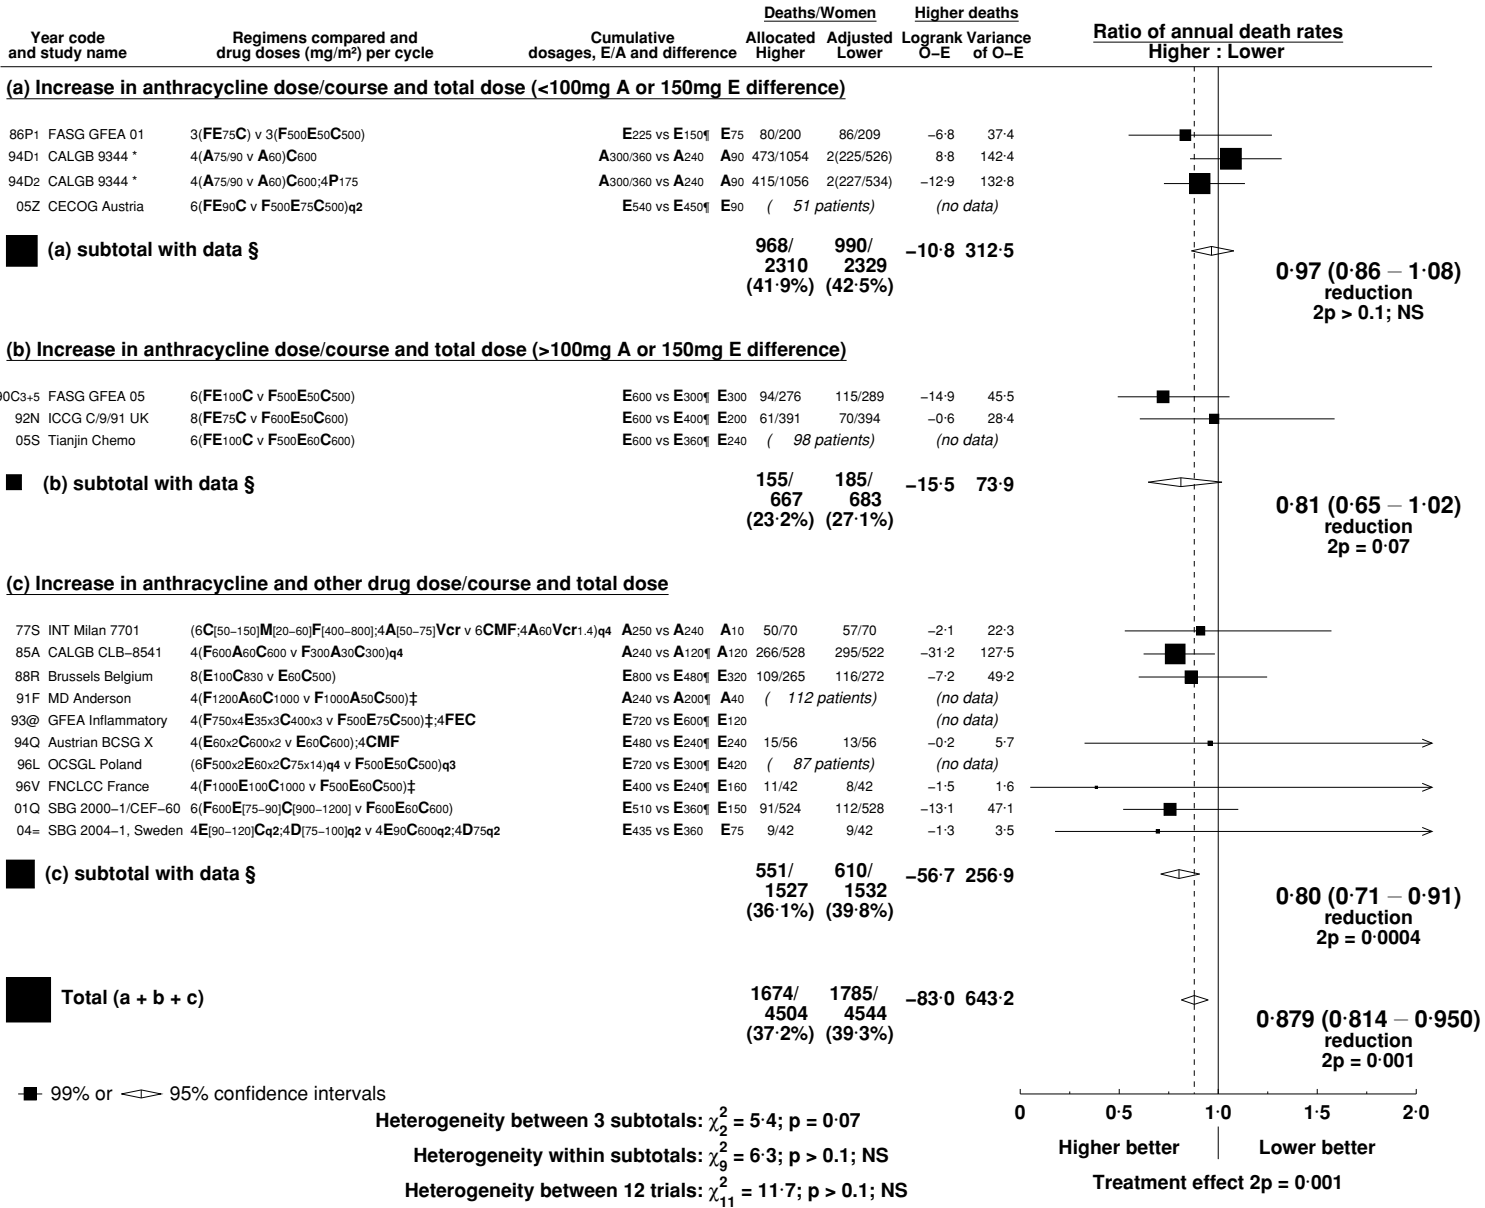

§ 5 trials with no data do not contribute to subtotals or to the overall total.

\* For balance, control patients in 3-way trials or trial strata count half or twice in subtotal(s) and in final total of deaths/patients.

‡ Pre-operative chemotherapy

¶ Control anthracycline dose less than E90 or A60 per cycle

Taxanes: D = docetaxel; P = paclitaxel. Anthracyclines: A = doxorubicin (Adriamycin); E = Epirubicin.

Other agents: C = cyclophosphamide; F = fluorouracil; M = methotrexate; Vcr = vincristine

All regimens q3week (unless specified as q1, q2 or q4). Semicolon [:] indicates treatment sequence. x14 means d1-14 po; x2 (x3) means d1, d8 (d15) iv

77S in control arm dose for CMF are C100M40F600

P53: 10-year cumulative risk of (A) any recurrence, (B) breast cancer mortality, (C) death without recurrence, (D) all-cause mortality; in trials of longer versus shorter anthracycline/taxane regimen (smoothed after 5 years)

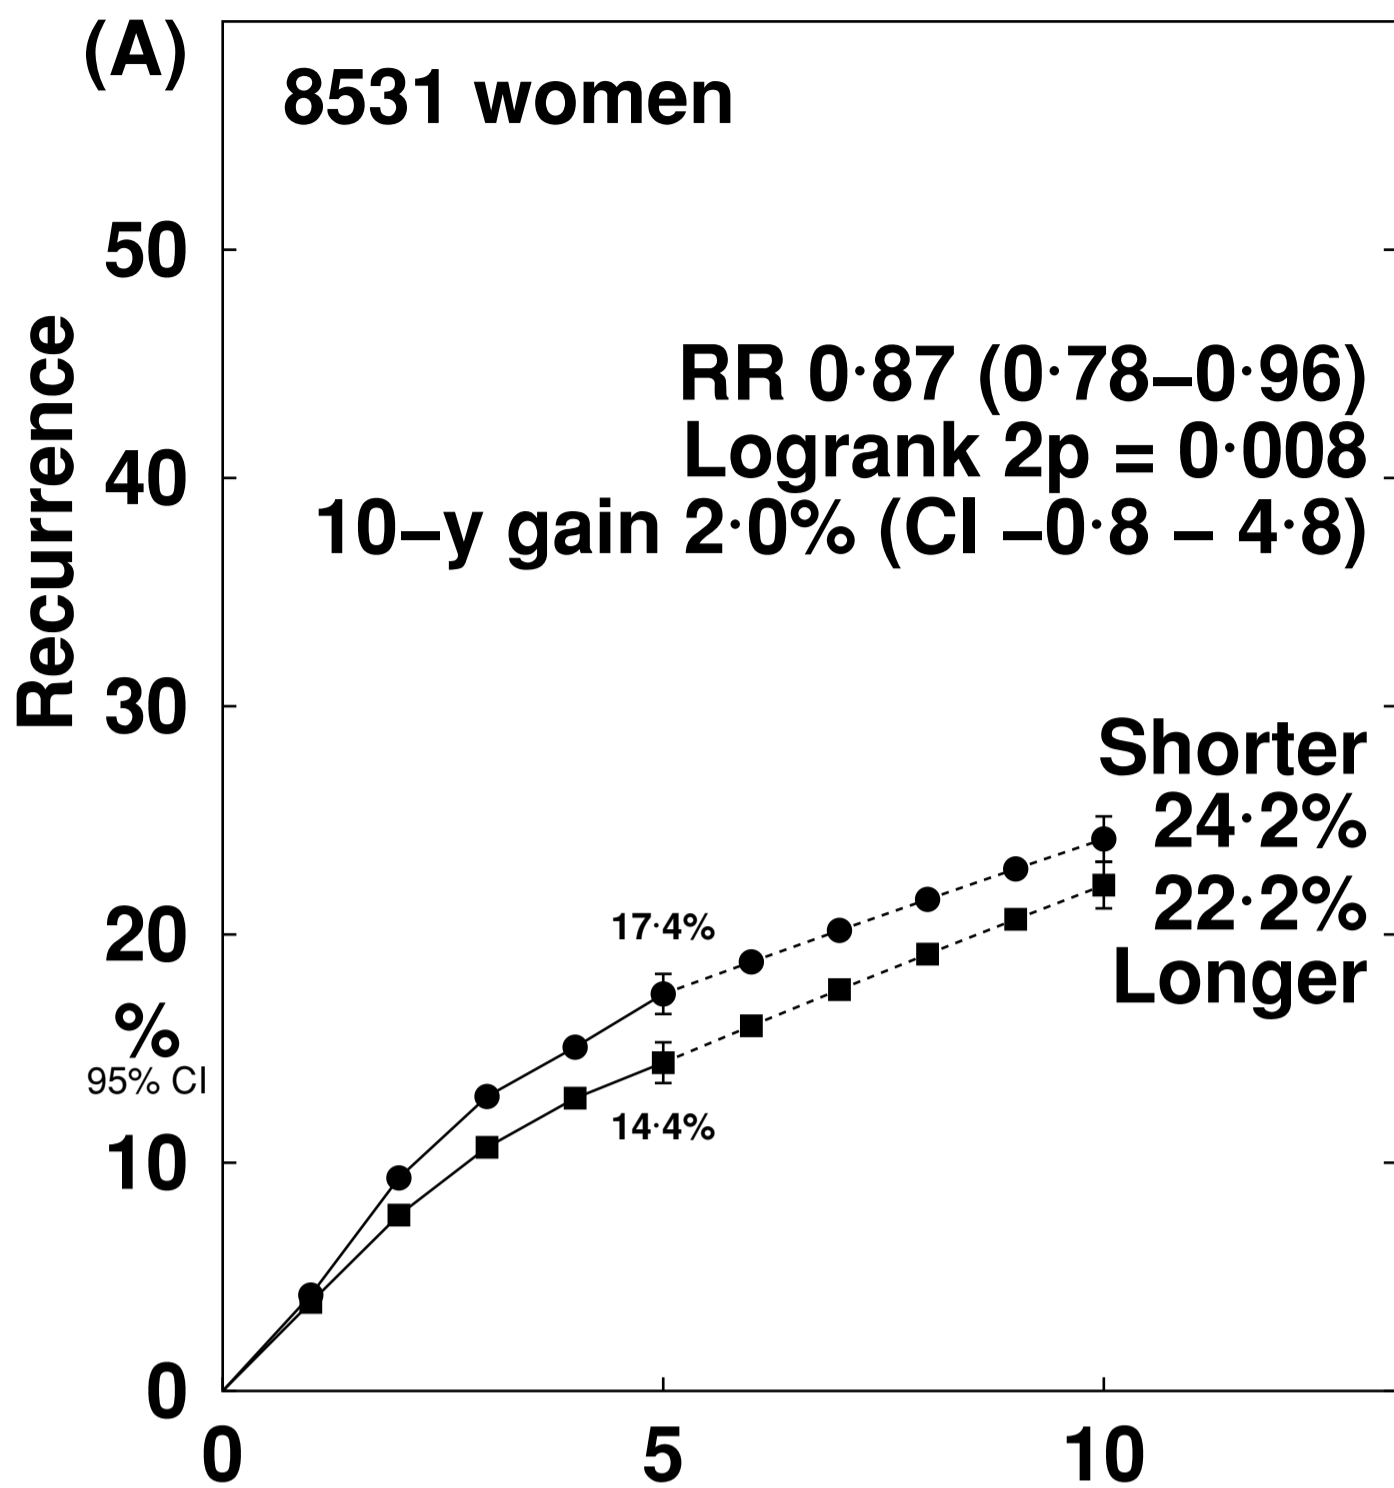

Recurrence rates (% / year) and logrank analyses

| Allocation                 | Years 0 – 4                          | Years 5 – 9                       | Year 10+                         |
|----------------------------|--------------------------------------|-----------------------------------|----------------------------------|
| Longer                     | 3.25 (573 / 17623)                   | 1.91 (148 / 7763)                 | 2.98 (15 / 503)                  |
| Shorter                    | 3.83 (667 / 17424)                   | 1.71 (129 / 7538)                 | 2.12 (10 / 472)                  |
| Rate ratio, from (O–E) / V | 0.81 CI 0.72 – 0.92<br>–54.9 / 268.3 | 1.11 CI 0.87 – 1.43<br>6.5 / 61.9 | 1.03 CI 0.39 – 2.67<br>0.1 / 4.2 |

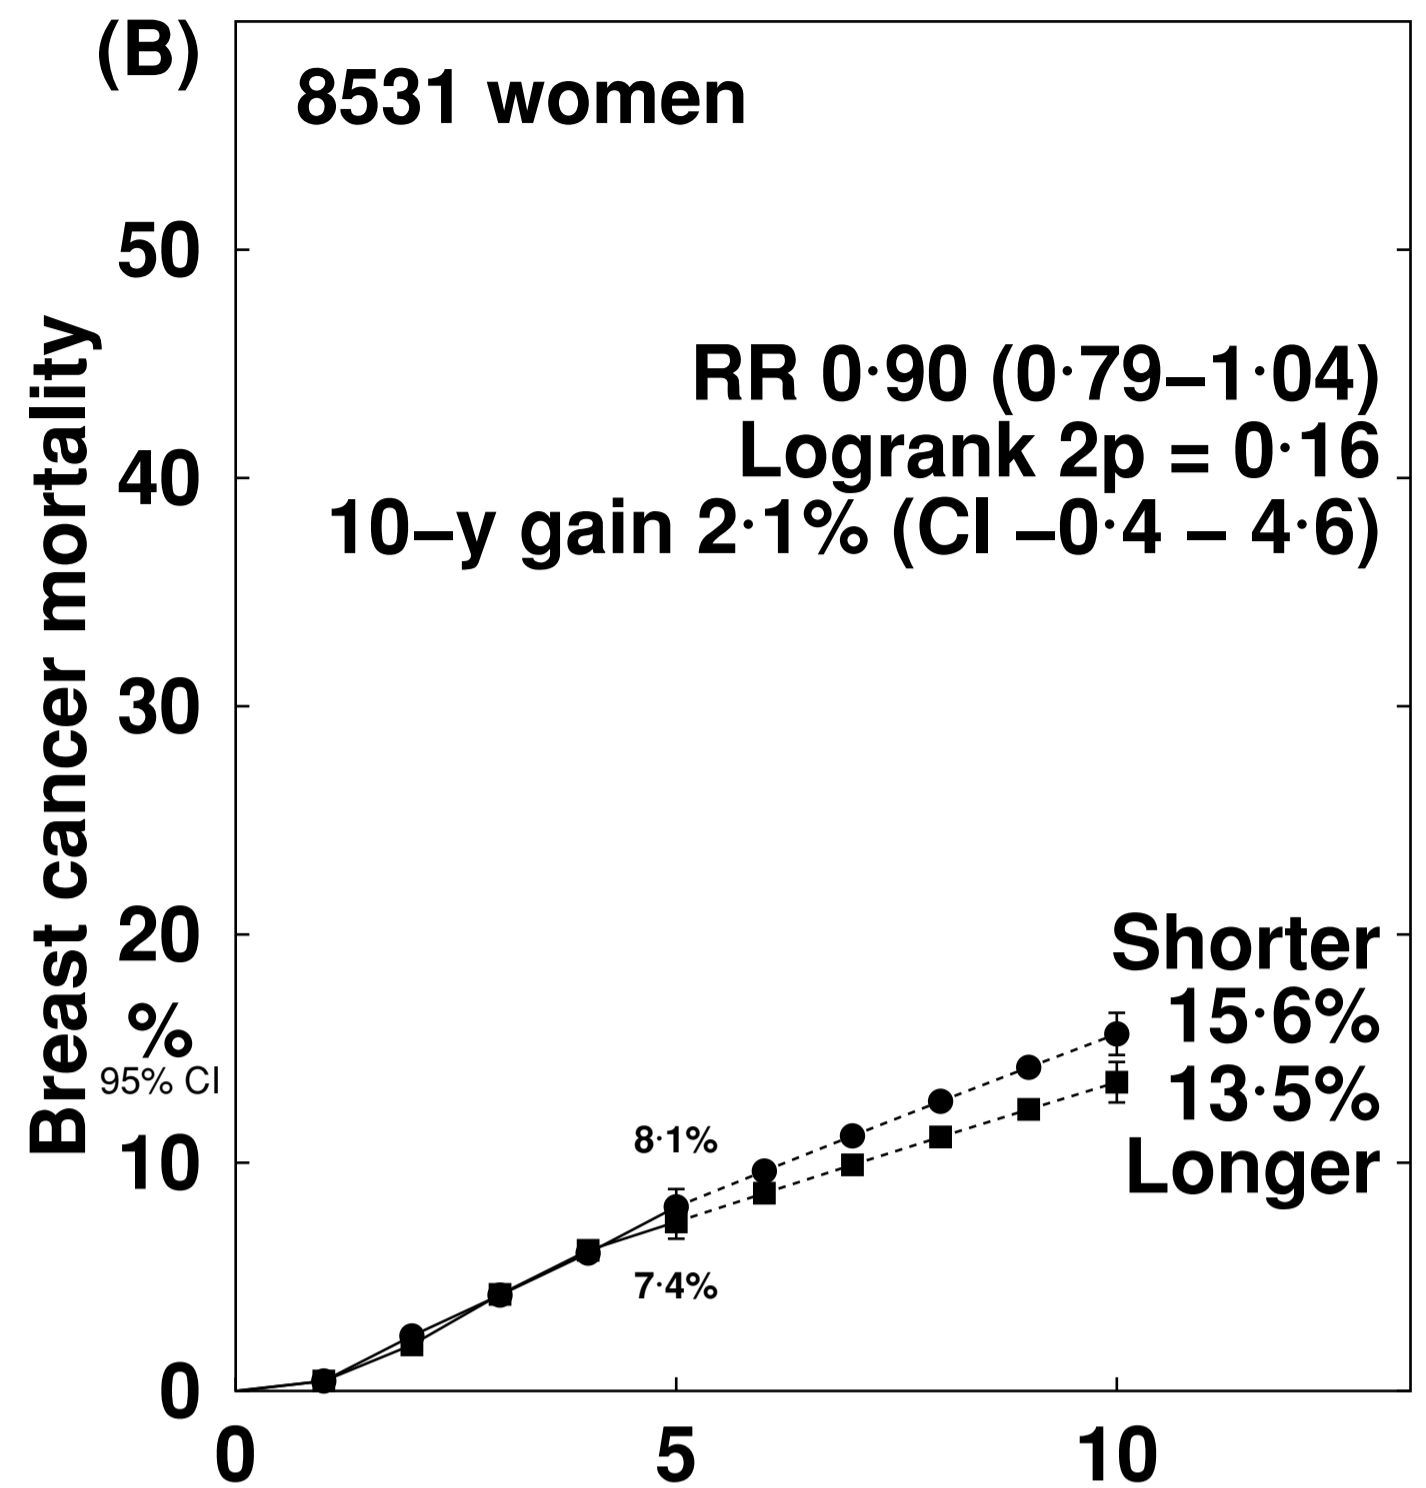

Death rates (% / year: total rate – rate in women without recurrence) & logrank analyses

| Allocation                 | Years 0 – 4                          | Years 5 – 9                         | Year 10+                         |
|----------------------------|--------------------------------------|-------------------------------------|----------------------------------|
| Longer                     | 1.53 CI 1.35 – 1.70                  | 1.44 CI 1.19 – 1.70                 | 3.41 CI 1.99 – 4.84              |
| Shorter                    | 1.65 CI 1.46 – 1.83                  | 1.64 CI 1.37 – 1.91                 | 2.44 CI 1.25 – 3.64              |
| Rate ratio, from (O–E) / V | 0.93 CI 0.78 – 1.10<br>–10.2 / 131.4 | 0.79 CI 0.61 – 1.03<br>–13.4 / 58.4 | 1.67 CI 0.81 – 3.45<br>3.8 / 7.4 |

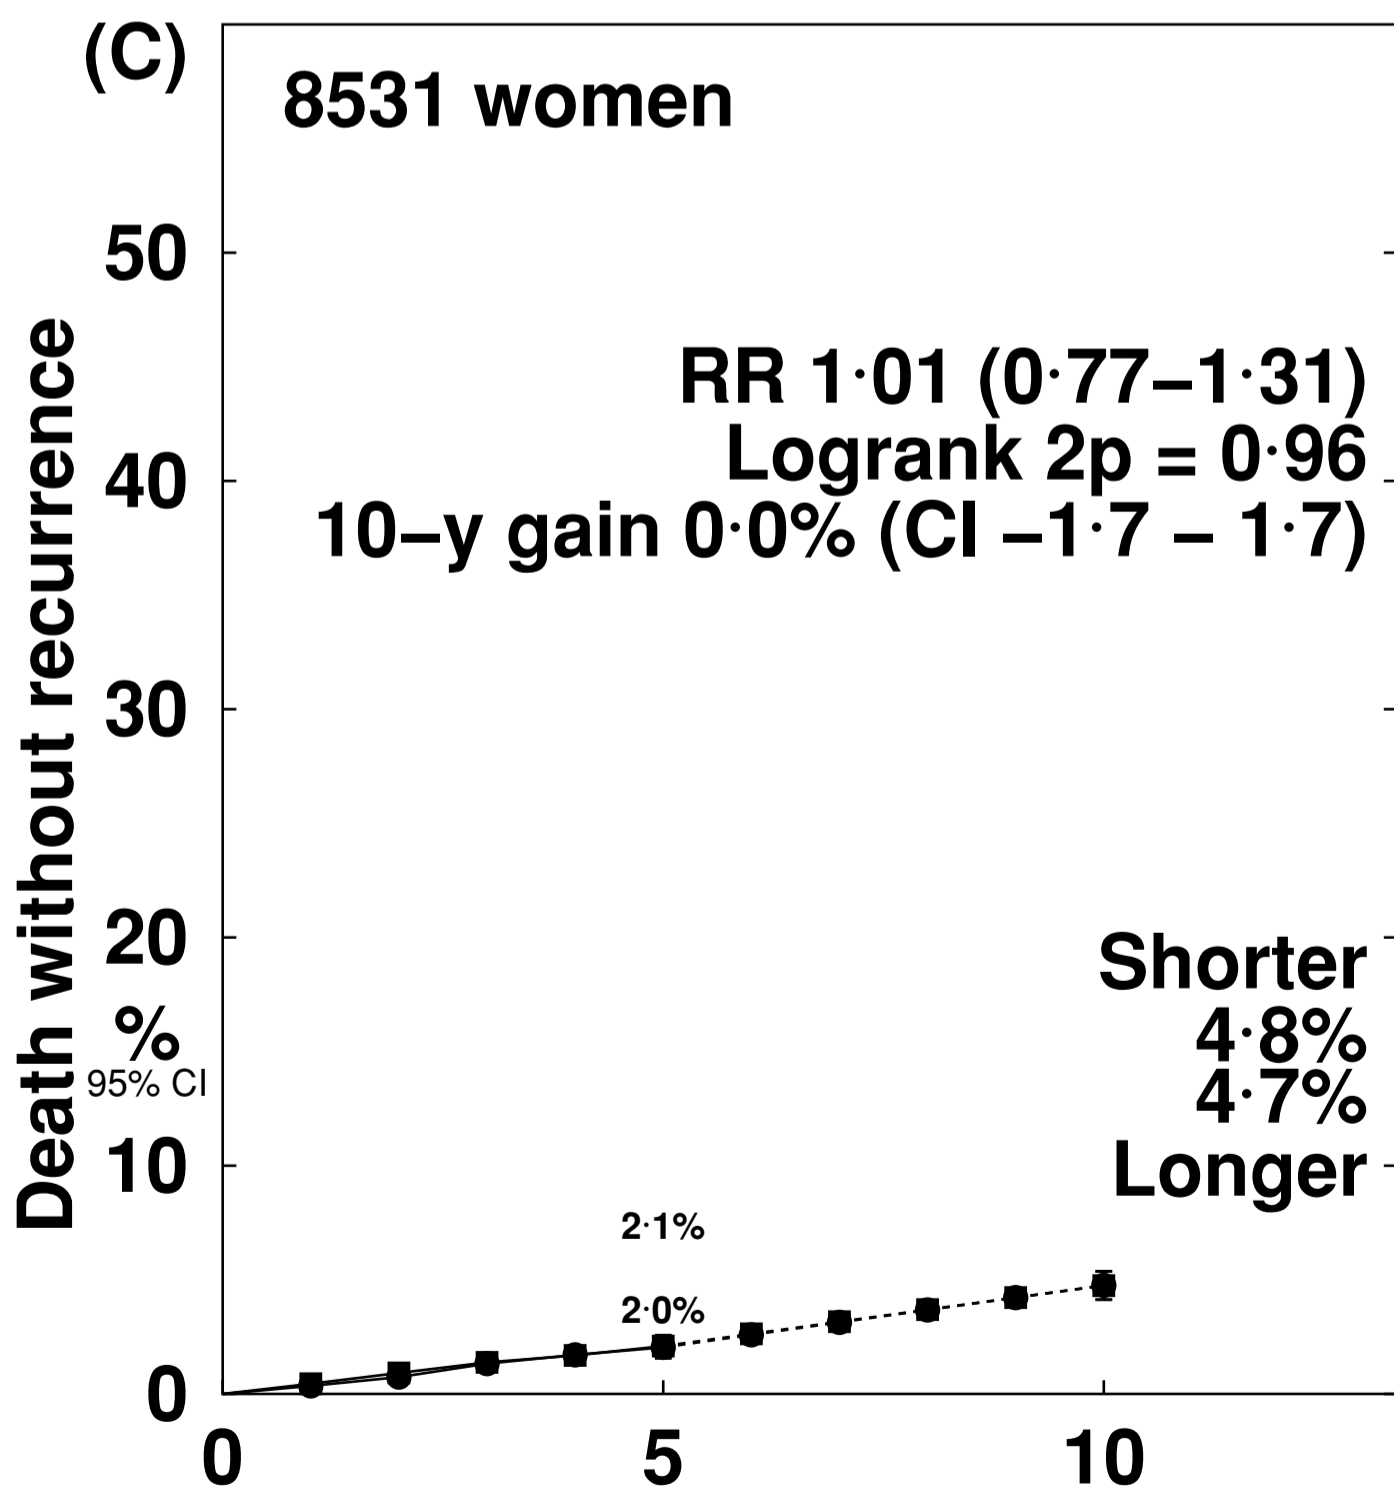

Death–without–recurrence rates (% / year) and logrank analyses

| Allocation                 | Years 0 – 4                       | Years 5 – 9                        | Year 10+                          |
|----------------------------|-----------------------------------|------------------------------------|-----------------------------------|
| Longer                     | 0.41 (72 / 17623)                 | 0.57 (44 / 7763)                   | 1.19 (6 / 503)                    |
| Shorter                    | 0.43 (75 / 17424)                 | 0.54 (41 / 7538)                   | 0.85 (4 / 472)                    |
| Rate ratio, from (O–E) / V | 1.03 CI 0.74 – 1.44<br>1.1 / 35.1 | 0.97 CI 0.63 – 1.51<br>–0.5 / 19.9 | 0.83 CI 0.16 – 4.35<br>–0.3 / 1.4 |

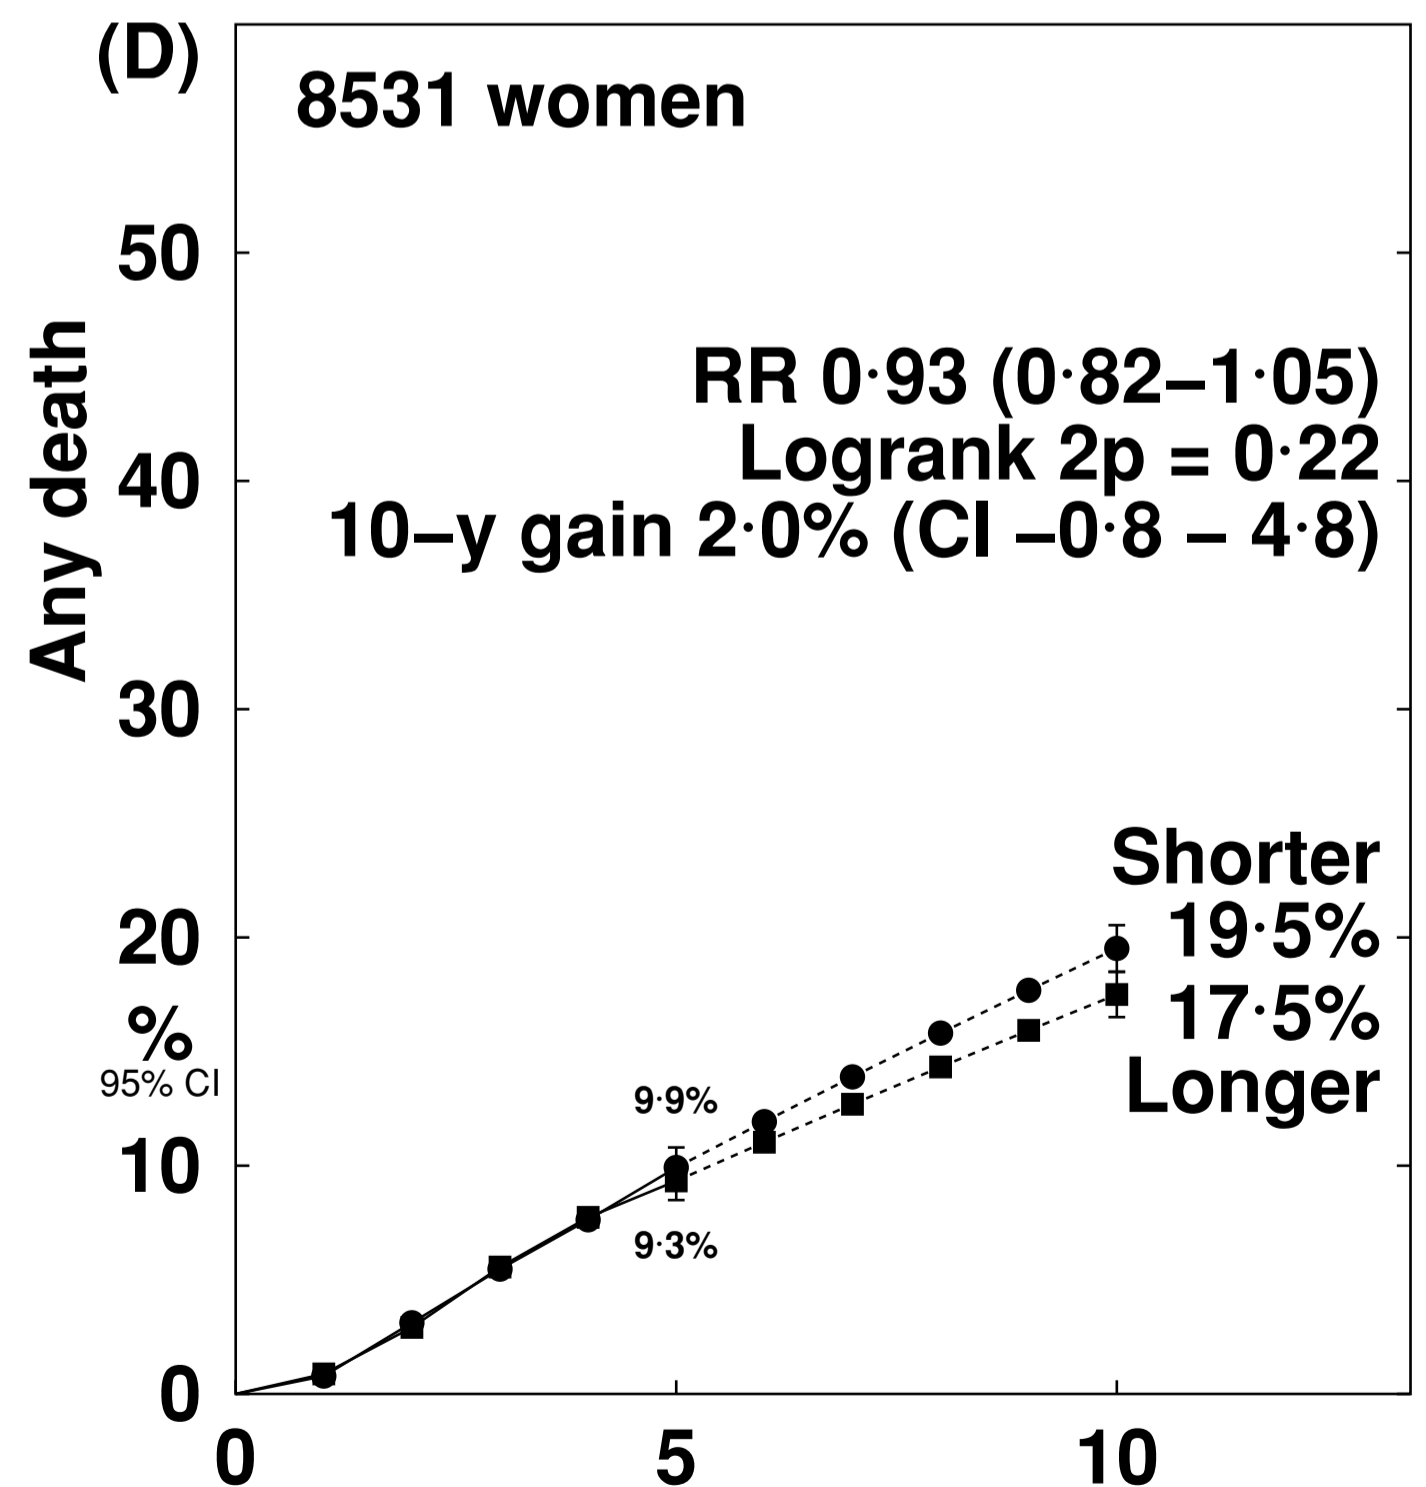

Death rates (% / year) and logrank analyses

| Allocation                 | Years 0 – 4                         | Years 5 – 9                         | Year 10+                         |
|----------------------------|-------------------------------------|-------------------------------------|----------------------------------|
| Longer                     | 1.93 (359 / 18621)                  | 1.98 (170 / 8600)                   | 4.34 (28 / 645)                  |
| Shorter                    | 2.07 (386 / 18633)                  | 2.17 (183 / 8449)                   | 3.05 (20 / 655)                  |
| Rate ratio, from (O–E) / V | 0.95 CI 0.81 – 1.10<br>–9.1 / 166.6 | 0.84 CI 0.67 – 1.04<br>–13.9 / 78.3 | 1.50 CI 0.77 – 2.90<br>3.5 / 8.8 |

P54: 10-year cumulative risk of (A) any recurrence, (B) breast cancer mortality, (C) death without recurrence, (D) all-cause mortality; in trials of higher versus lower anthracycline dose

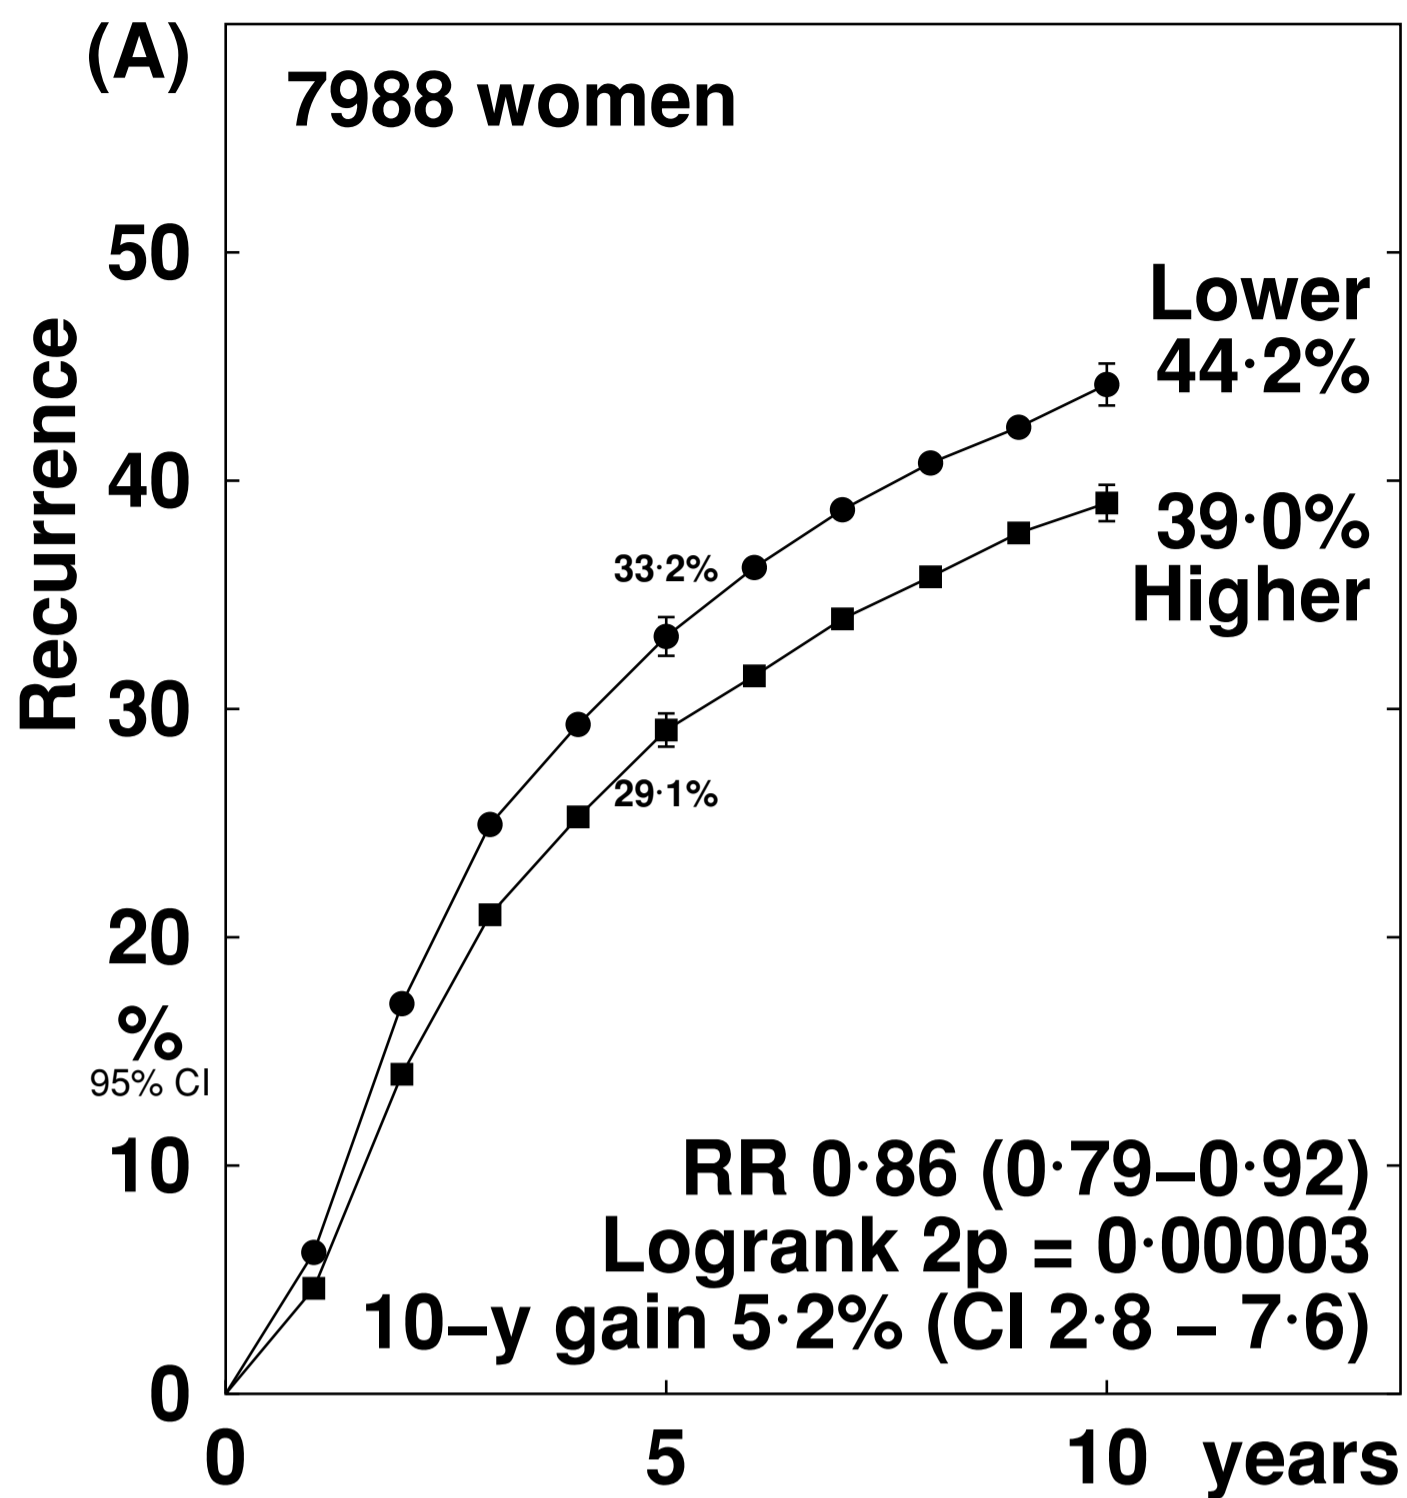

Recurrence rates (% / year) and logrank analyses

| Allocation                 | Years 0 – 4                          | Years 5 – 9                          | Year 10+                          |
|----------------------------|--------------------------------------|--------------------------------------|-----------------------------------|
| Higher                     | 7.16 (1306 / 18250)                  | 3.09 (372 / 12039)                   | 2.33 (185 / 7935)                 |
| Lower                      | 8.10 (1104 / 13625)                  | 3.77 (326 / 8657)                    | 2.20 (115 / 5234)                 |
| Rate ratio, from (O–E) / V | 0.84 CI 0.77 – 0.92<br>–86.2 / 493.8 | 0.83 CI 0.71 – 0.98<br>–28.1 / 153.1 | 1.06 CI 0.82 – 1.35<br>3.4 / 62.9 |

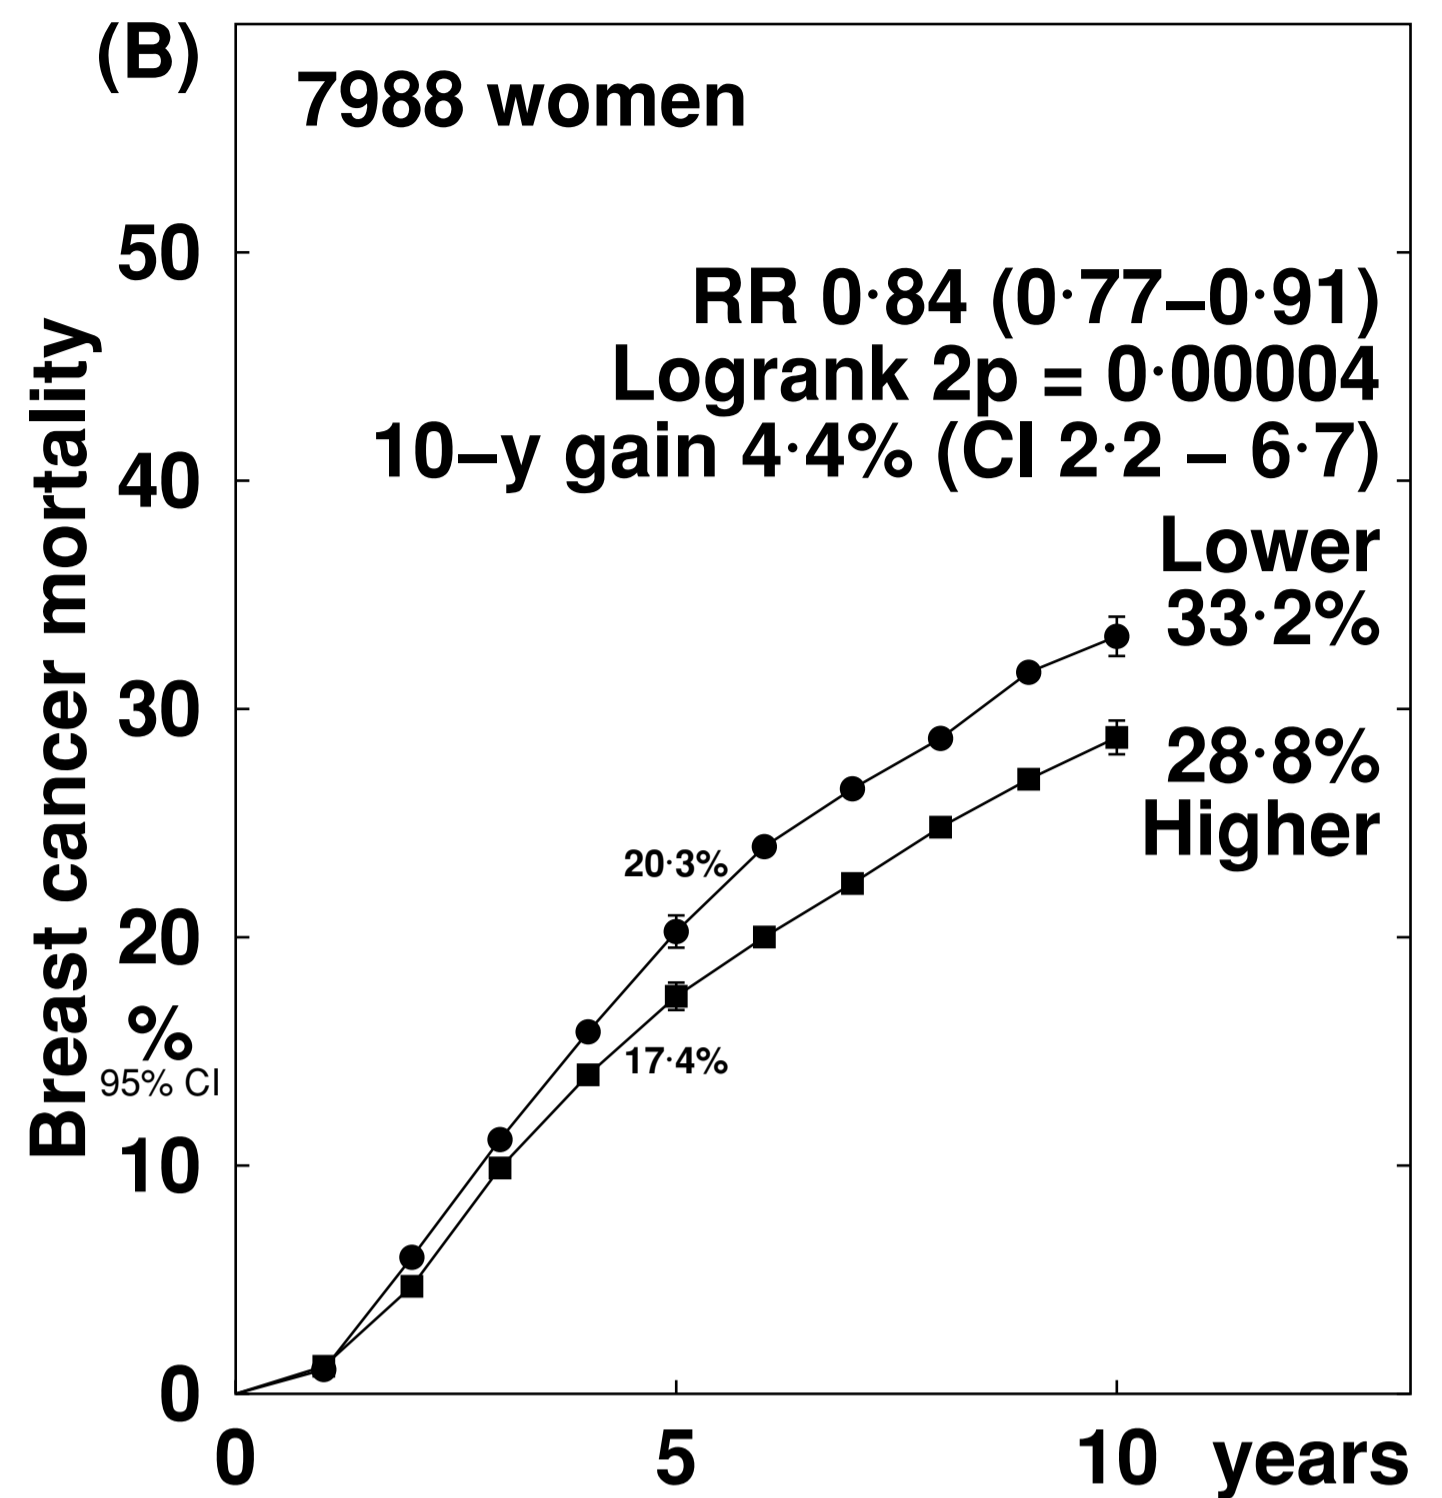

Death rates (% / year: total rate – rate in women without recurrence) & logrank analyses

| Allocation                 | Years 0 – 4                          | Years 5 – 9                          | Year 10+                            |
|----------------------------|--------------------------------------|--------------------------------------|-------------------------------------|
| Higher                     | 3.92 CI 3.64 – 4.19                  | 3.06 CI 2.78 – 3.35                  | 1.85 CI 1.59 – 2.11                 |
| Lower                      | 4.31 CI 3.98 – 4.64                  | 3.60 CI 3.24 – 3.97                  | 2.26 CI 1.90 – 2.62                 |
| Rate ratio, from (O–E) / V | 0.84 CI 0.75 – 0.94<br>–52.4 / 308.8 | 0.83 CI 0.71 – 0.96<br>–33.8 / 176.1 | 0.87 CI 0.69 – 1.09<br>–10.1 / 72.6 |

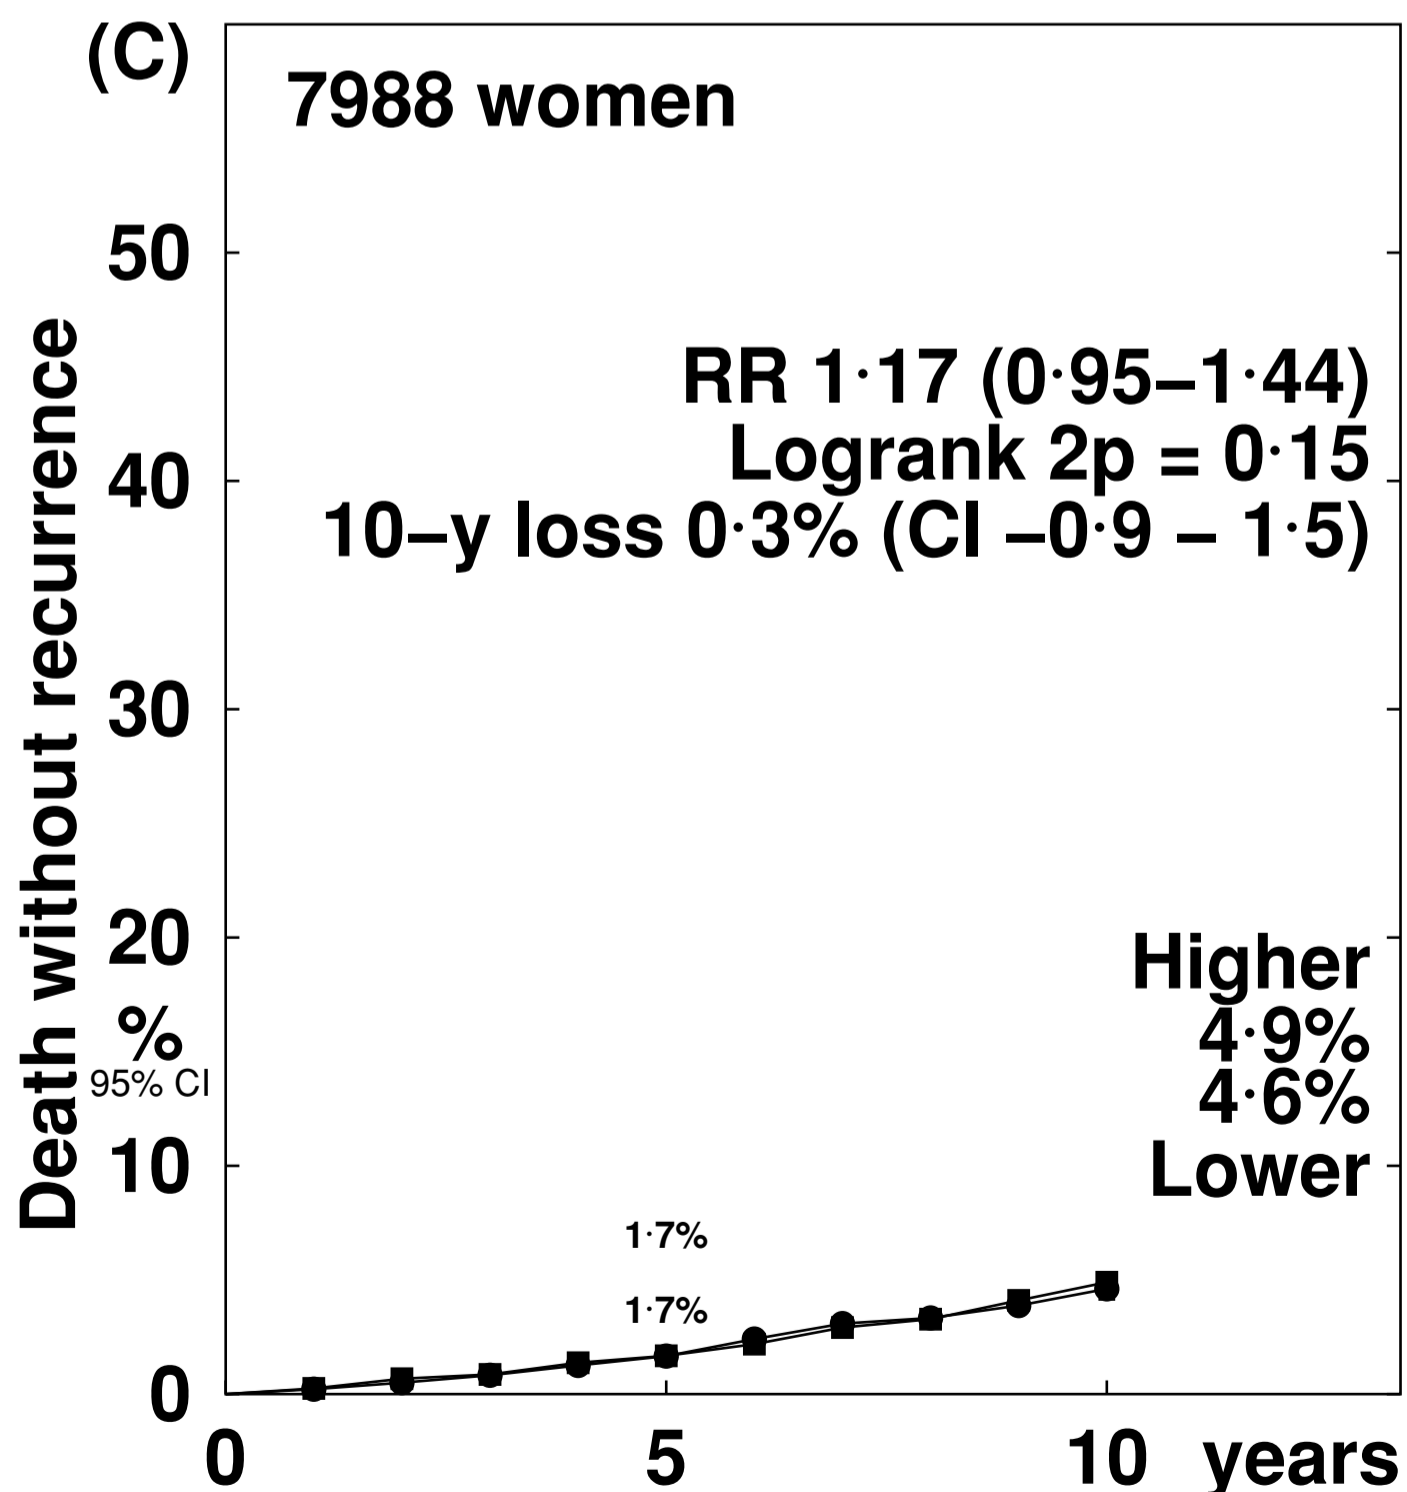

Death–without–recurrence rates (% / year) and logrank analyses

| Allocation                 | Years 0 – 4                       | Years 5 – 9                       | Year 10+                           |
|----------------------------|-----------------------------------|-----------------------------------|------------------------------------|
| Higher                     | 0.35 (64 / 18250)                 | 0.66 (79 / 12039)                 | 1.37 (109 / 7935)                  |
| Lower                      | 0.30 (41 / 13625)                 | 0.60 (52 / 8657)                  | 1.03 (54 / 5234)                   |
| Rate ratio, from (O–E) / V | 1.03 CI 0.68 – 1.54<br>0.6 / 23.3 | 1.07 CI 0.75 – 1.54<br>2.0 / 29.2 | 1.38 CI 0.98 – 1.94<br>10.8 / 33.2 |

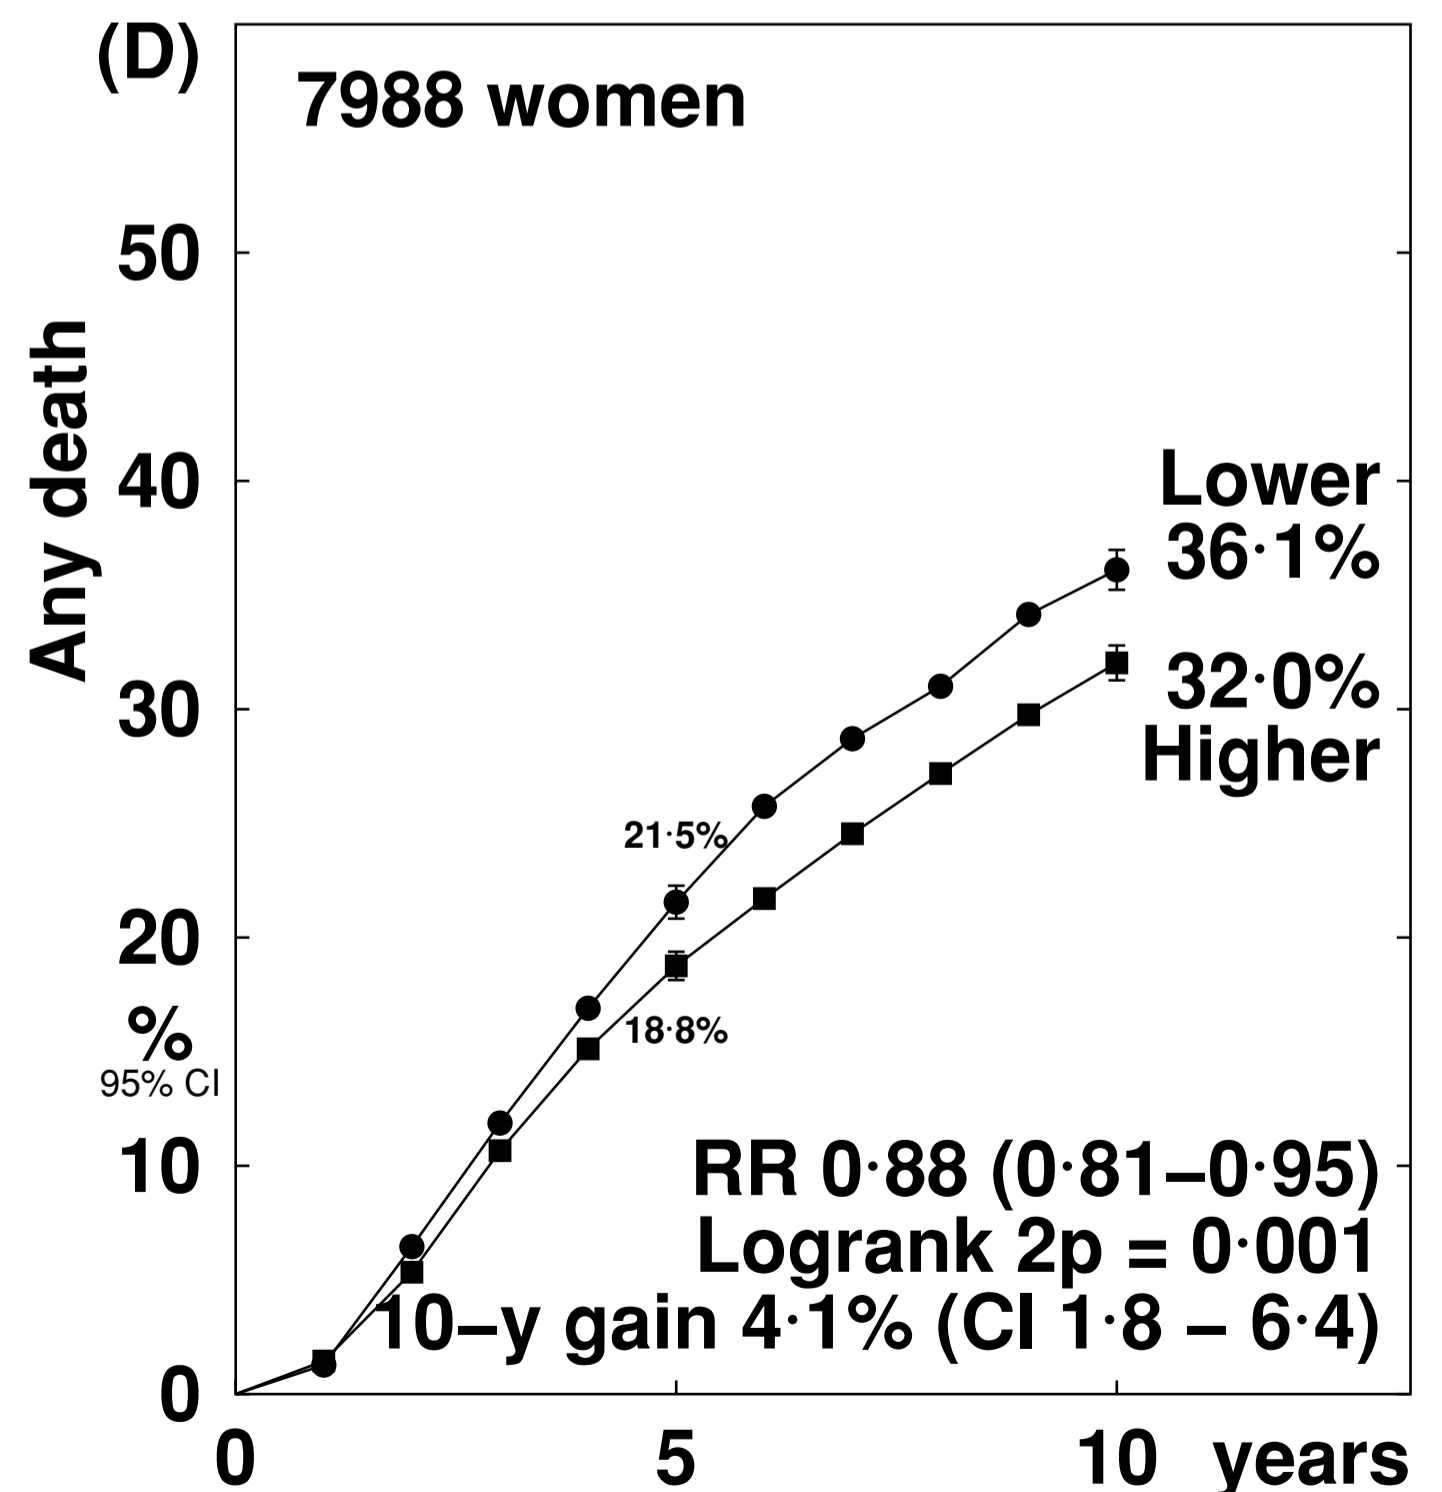

Death rates (% / year) and logrank analyses

| Allocation                 | Years 0 – 4                          | Years 5 – 9                          | Year 10+                           |
|----------------------------|--------------------------------------|--------------------------------------|------------------------------------|
| Higher                     | 4.26 (854 / 20036)                   | 3.69 (520 / 14104)                   | 3.12 (300 / 9604)                  |
| Lower                      | 4.60 (703 / 15284)                   | 4.14 (427 / 10314)                   | 3.13 (203 / 6479)                  |
| Rate ratio, from (O–E) / V | 0.86 CI 0.77 – 0.95<br>–51.8 / 332.1 | 0.86 CI 0.75 – 0.98<br>–31.8 / 205.3 | 1.01 CI 0.83 – 1.22<br>0.6 / 105.9 |

**P55-57: Toxicity table 1** – Anthracycline plus taxane versus taxane without anthracycline. Selected reported toxicity data (extracted, where available, from individual trial publications). All columns reported as Taxane plus anthracycline versus Taxane without anthracycline. n= number of patients, (%), NR = not reported

|                                                                                                     | Trial name                                                                                                                                 | No. pts | All toxicity Grade $\geq 3$ n (%) | Cardiac and Vascular events Grade $\geq 3$ n (%)                                                                                                                                                        | Peripheral Sensory Neuropathy Grade $\geq 2$ n (%)    | Neutropenia Grade $\geq 3$ n (%) | Febrile Neutropenia Grade $\geq 3$ n (%) | Fatigue Grade $\geq 3$ n (%) | Compliance completed all cycles % | Reference                                                                                    |
|-----------------------------------------------------------------------------------------------------|--------------------------------------------------------------------------------------------------------------------------------------------|---------|-----------------------------------|---------------------------------------------------------------------------------------------------------------------------------------------------------------------------------------------------------|-------------------------------------------------------|----------------------------------|------------------------------------------|------------------------------|-----------------------------------|----------------------------------------------------------------------------------------------|
| (a) Concurrent docetaxel + anthracycline vs same dose docetaxel + cyclophosphamide                  |                                                                                                                                            |         |                                   |                                                                                                                                                                                                         |                                                       |                                  |                                          |                              |                                   |                                                                                              |
| 07&                                                                                                 | <b>USO 6090/11271</b><br>6(A <sub>50</sub> D <sub>75</sub> C <sub>500</sub> vs D <sub>75</sub> C <sub>600</sub> ) q3                       | 1263    | 350 vs 380 (56.3 vs 59.3)         | <b>Combined:</b> 25 vs 4 (4.0 vs 0.6)<br>Asystole 1 vs 0<br>Cardiomyopathy/cardiac failure/MI 11 vs 0<br>Hypertension 1 vs 0<br>Tachycardia/arrhythmia 2 vs 2<br>Thromboembolic (including CVA) 10 vs 2 | 33 vs 40 (5.3 vs 6.2)                                 | 213 vs 268 (29.4 vs 41.8)        | 49 vs 50 (7.9 vs 7.8)                    | 46 vs 19 (7.4 vs 3.0)        | NR                                | Blum et al J Clin Oncol 2017, 35:2647-55                                                     |
| 09J                                                                                                 | <b>NSABP-B46i</b><br>6(A <sub>50</sub> D <sub>75</sub> C <sub>500</sub> vs D <sub>75</sub> C <sub>600</sub> ) q3                           | 1055    | 230 vs 201 (43.7 vs 40.0)         | <b>Combined:</b> 21 vs 7 (4.0 vs 1.3)<br>Cardiac ischaemia 0 vs 0<br>Hypertension 1 vs 0<br>LV dysfunction 5 vs 0<br>Thromboembolic 10 vs 5<br>CNS ischaemia 3 vs 0<br>Arrhythmia 3 vs 2                | 38 vs 47 (7.2 vs 8.9)                                 | 76 vs 52 (14.4 vs 9.8)           | 35 vs 27 (6.7 vs 5.1)                    | 34 vs 23 (6.5 vs 4.4)        | NR                                | Blum et al J Clin Oncol 2017, 35:2647-55                                                     |
| 09R                                                                                                 | <b>Shanghai Jiao Tong</b><br>6(A <sub>50</sub> /E <sub>60</sub> D <sub>75</sub> C <sub>500</sub> vs D <sub>75</sub> C <sub>600</sub> ) q3† | 96      | NR                                | NR                                                                                                                                                                                                      | NR                                                    | 40 vs 24 (78.4 vs 53.3)          | 3 vs 2 (5.9 vs 4.4)                      | NR                           | 88.2 vs 71                        | Chen et al Breast Can Res Treat 2013, 142:549-58<br>Chen et al Chin J Can Res 2016, 28:561-9 |
| (b) Sequential taxane plus anthracycline versus higher cumulative dose docetaxel + cyclophosphamide |                                                                                                                                            |         |                                   |                                                                                                                                                                                                         |                                                       |                                  |                                          |                              |                                   |                                                                                              |
| 08L                                                                                                 | <b>DBCg 07 READ</b><br>(3E <sub>90</sub> C <sub>600</sub> ;3D <sub>100</sub> vs 6D <sub>75</sub> C <sub>600</sub> ) q3                     | 2012    | NR                                | <b>Combined:</b> 8 vs 8 (0.8 vs 0.8)<br>Cardiomyopathy 1 vs 2<br>Heart failure 7 vs 6                                                                                                                   | 349 vs 297 (35.1 vs 29.5)                             | NR                               | 102 vs 59 (10.3 vs 5.9)                  | 297 vs 245 (29.9 vs 24.4)    | 90.7 vs 87.3                      | Ejlertsen et al J Clin Oncol 2017, 35:2639-46                                                |
| 09&                                                                                                 | <b>Kangawa, Japan</b><br>(3FE <sub>100</sub> C <sub>500</sub> ;3D <sub>100</sub> vs 6D <sub>75</sub> C <sub>600</sub> ) q3†                | 103     | NR                                | NR                                                                                                                                                                                                      | 19 vs 19 (36.5 vs 39.6)<br>reported as nerve disorder | 46 vs 47 (88.5 vs 97.9)          | 11 vs 2 (21.2 vs 4.2)                    | 1 vs 1 (1.9 vs 2.1)          | 94.3 vs 94                        | Narui et al The Breast 2019, 47:1-9                                                          |

|     | Trial name                                                                                                                                                                                                                  | No. pts       | All toxicity Grade $\geq 3$ n (%)        | Cardiac and Vascular events Grade $\geq 3$ n (%)                                                                                                                         | Peripheral Sensory Neuropathy Grade $\geq 2$ n (%) | Neutropenia Grade $\geq 3$ n (%)         | Febrile Neutropenia Grade $\geq 3$ n (%) | Fatigue Grade $\geq 3$ n (%)        | Compliance completed all cycles % | Reference                                                                                   |
|-----|-----------------------------------------------------------------------------------------------------------------------------------------------------------------------------------------------------------------------------|---------------|------------------------------------------|--------------------------------------------------------------------------------------------------------------------------------------------------------------------------|----------------------------------------------------|------------------------------------------|------------------------------------------|-------------------------------------|-----------------------------------|---------------------------------------------------------------------------------------------|
| 09= | <b>NSABP-B49 (results only as %)</b><br>(4A <sub>60</sub> C <sub>q2/3</sub> ;12P <sub>80</sub> q1/4P <sub>175</sub> q2)/<br>6A <sub>50</sub> D <sub>75</sub> C <sub>500</sub> q3 vs<br>6D <sub>75</sub> C <sub>600</sub> q3 | 1832          | (42 vs 40)                               | LV dysfunction (<1 vs <1 )<br>Hypertension (3 vs 3)<br>Thromboembolic event (G3 1, G4< 1 vs G3 < 1 %)<br>Heart failure 0 vs 0                                            | $\geq G3$ (4 vs 1)                                 | G3 (4 vs <1)<br>G4 (1 vs 1)              | G3 (3 vs 7)<br>G4 (<1 vs 1)              | (4 vs 4)                            | NR                                | Blum et al J Clin Oncol 2017, 35:2647-55                                                    |
| 09E | <b>SUCCESS C<sup>^</sup></b><br>(3FE <sub>100</sub> C <sub>500</sub> ;3D <sub>100</sub> vs<br>6D <sub>75</sub> C <sub>600</sub> ) q3                                                                                        | 3643          | <sup>^</sup> 2245 vs 2089 (76.3 vs 70.1) | NR                                                                                                                                                                       | <sup>^</sup> $\geq G3$ 45 vs 23 (1.5 vs 0.8)       | <sup>^</sup> 1187 vs 1101 (40.3 vs 36.9) | <sup>^</sup> 114 vs 145 (3.9 vs 4.9)     | <sup>^</sup> 131 vs 83 (4.4 vs 2.8) | NR                                | de Gregorio et al Br J Cancer 2022, 126:1715-24                                             |
| 09M | <b>WSG PLAN-B<sup>^</sup></b><br>(4E <sub>90</sub> C <sub>600</sub> ;4D <sub>100</sub> vs<br>6D <sub>75</sub> C <sub>600</sub> ) q3                                                                                         | 2449          |                                          | <b>Combined:</b> 5 vs 6<br>Heart failure 3 vs 3<br>Cardiac death 2 vs 2<br>PE 0 vs 1                                                                                     |                                                    |                                          |                                          |                                     | 87.5 vs 93.0                      | Nitz et al J Clin Oncol 2019, 37:799-808<br>de Gregorio et al Br J Cancer 2022, 126:1715-24 |
| 09U | <b>JBCRG-10</b><br>(4D <sub>75</sub> C <sub>600</sub> ;4FE <sub>100</sub> C <sub>500</sub> or vv vs 6D <sub>75</sub> C <sub>600</sub> )Trz q3‡                                                                              | 67 (43 vs 24) | 24 vs 11 (55.8 vs 45.8)                  | Heart failure 1 vs 0 (2.3 vs 0)<br>PE 1 vs 0 (2.3 vs 0)                                                                                                                  | NR                                                 | 7 vs 4 (16.2 vs 16.7)                    | 11 vs 4 (25.6 vs 16.7)                   | 0 vs 0 (0 vs 0)                     | NR                                | Ueno et al Jpn J Clin Oncol 2020, 50:3-11                                                   |
| 09V | <b>JBCRG-09</b><br>(3D <sub>75</sub> C <sub>600</sub> ;3FE <sub>100</sub> C <sub>500</sub> or vv vs 6D <sub>75</sub> C <sub>600</sub> ) q3‡                                                                                 | 195           | NR                                       | NR                                                                                                                                                                       | NR                                                 | 55 vs 36 (43.0 vs 55.4)                  | 26 vs 9 (20.3 vs 13.8)                   | 1 vs 0 (0.8 vs 0)                   | 95.3 vs 86.1                      | Ishiguro et al Breast Can Res and Treatment 2020, 180:715-24                                |
| 10V | <b>MASTER</b><br>(3FEC <sub>100</sub> C <sub>500</sub> ;3D <sub>100</sub> vs 6D <sub>75</sub> C <sub>600</sub> ) q3                                                                                                         | 1047          | NR                                       | <b>Combined:</b> 11 vs 4 (2.1 vs 0.8)<br>Decreased ejection fraction 5 vs 1 (0.9 vs 0.2)<br>Ventricular arrhythmia 5 vs 2 (0.9 vs 0.3)<br>Thrombosis 1 vs 1 (0.2 vs 0.2) | $\geq G3$ 4 vs 15 (0.8 vs 2.8)                     | 279 vs 290 (53.4 vs 55.3)                | 9 vs 11 (1.7 vs 2.0)                     | 24 vs 24 (4.5 vs 4.6)               | 93.5 vs 94.5                      | Yu et al Lancet Regional Health 2021, 11:100158                                             |



|                                                              | Trial name                                                                                                                                                         | No. pts | All toxicity Grade $\geq 3$ n (%) | Cardiac and Vascular events Grade $\geq 3$ n (%)                                                         | Peripheral Sensory Neuropathy Grade $\geq 2$ n (%)                | Neutropenia Grade $\geq 3$ n (%)                           | Febrile Neutropenia Grade $\geq 3$ n (%)                  | Fatigue Grade $\geq 3$ n (%)                             | Compliance completed all cycles % | Reference                                                                         |
|--------------------------------------------------------------|--------------------------------------------------------------------------------------------------------------------------------------------------------------------|---------|-----------------------------------|----------------------------------------------------------------------------------------------------------|-------------------------------------------------------------------|------------------------------------------------------------|-----------------------------------------------------------|----------------------------------------------------------|-----------------------------------|-----------------------------------------------------------------------------------|
| (c) Taxane plus anthracycline versus taxane +/- capecitabine |                                                                                                                                                                    |         |                                   |                                                                                                          |                                                                   |                                                            |                                                           |                                                          |                                   |                                                                                   |
| 00W                                                          | <b>N-SAS-BC 02 Japan (results only as %)</b><br>(4A <sub>60</sub> C <sub>600</sub> ;4P <sub>175</sub> /4D <sub>75</sub> vs 8P <sub>175</sub> /D <sub>75</sub> ) q3 | 1049    | NR                                | Cardiac arrhythmia:<br>AC-P vs P: (1.0 vs 0.5)<br>AC-D vs D: (0 vs 1.1)                                  | $\geq 3$ AC-P vs P:<br>(4.2 vs 5.7)<br>AC-D vs D:<br>(0.4 vs 3.8) | AC-P vs P:<br>(17.2 vs 1.9)<br>AC-D vs D:<br>(19.5 vs 6.9) | AC-P vs P:<br>(5.7 vs 0.4)<br>AC-D vs D:<br>(11.1 vs 8.1) | AC-P vs P:<br>(3.8 vs 1.9)<br>AC-D vs D:<br>(3.1 vs 1.9) | 87 vs 86                          | Watanabe et al Cancer 2017, 123:759-68                                            |
| 06Z                                                          | <b>MINDACT</b><br>(3FE <sub>100</sub> C <sub>500</sub> ;3D <sub>100</sub> vs 6D <sub>75</sub> Cap <sub>1650d1-14</sub> ) q3                                        | 392     | NR                                | NR                                                                                                       | NR                                                                | NR                                                         | NR                                                        | NR                                                       | NR                                | Cardoso et al NEJM 2016, 375:717-29<br>Piccart et al Lancet Oncology 2021, 476-88 |
| (d) Taxane plus anthracycline versus taxane + carboplatin    |                                                                                                                                                                    |         |                                   |                                                                                                          |                                                                   |                                                            |                                                           |                                                          |                                   |                                                                                   |
| 01M                                                          | <b>BCIRG 006</b><br>(4A <sub>60</sub> C <sub>600</sub> ;4D <sub>100</sub> vs 6D <sub>75</sub> Cpt <sub>AUC6</sub> ) q3<br>+12Trz q1;Trz q3 to 1yr                  | 2149    | NR                                | Congestive heart failure<br>21 v 4 (2.0 vs 0.4)<br>Hypertension (any grade)<br>178 vs 190 (16.6 vs 17.7) | Grade $\geq 1$<br>531 vs 380<br>(49.7 vs 36.0)                    | 764 vs 696<br>(71.5 vs 65.9)                               | 116 vs 101<br>(10.9 vs 9.6)                               | 77 vs 76 (7.2 vs 7.2)                                    | NR                                | Slamon et al NEJM 2011, 365:1273-83                                               |
| 11R                                                          | <b>PATTERN</b><br>3FE <sub>100</sub> C <sub>500</sub> ;3D <sub>100</sub> q3 vs 6((P <sub>80</sub> Cpt <sub>AUC2</sub> ) <sub>d1,8,15</sub> ) q4                    | 647     | NR                                | NR                                                                                                       | 3 vs 12 (0.9 vs 3.7)                                              | 297 vs 283<br>(92.8 vs 87.9)                               | 30 vs 3 (9.4 vs 0.9)                                      | 3 vs 3 (0.9 vs 0.9)                                      | 94.7 vs 92.9                      | Yu et al JAMA oncology 2020, 6:1390-6                                             |

^ combined results from joint publication

**P58: Toxicity table 2** – Trials of docetaxel versus paclitaxel. Selected toxicity reporting extracted from individual trial publications

Where available results presented as n=number, (%), NR = not reported

|                                                | Trial name                                                                                 | No. pts | All toxicity<br>Grade $\geq 3$<br>n (%) | Peripheral<br>Sensory<br>neuropathy<br>Grade $\geq 2$<br>n (%) | Neutropenia<br>Grade $\geq 3$<br>n (%) | Febrile<br>neutropenia<br>Grade $\geq 3$<br>n (%) | Fatigue<br>Grade $\geq 3$<br>n (%) | Dose<br>modification<br>n (%) | Compliance %<br>Completed all<br>taxane cycles | Reference                                       |
|------------------------------------------------|--------------------------------------------------------------------------------------------|---------|-----------------------------------------|----------------------------------------------------------------|----------------------------------------|---------------------------------------------------|------------------------------------|-------------------------------|------------------------------------------------|-------------------------------------------------|
| <b>Docetaxel q2 or 3 vs Paclitaxel q2 or 3</b> |                                                                                            |         |                                         |                                                                |                                        |                                                   |                                    |                               |                                                |                                                 |
| 99V                                            | <b>ECOG E1199 (results only as %)</b><br>4AC;4(D <sub>100</sub> vs P <sub>175</sub> ) q3   | 2534    | (71 vs 30)                              | (16 vs 20)                                                     | Grade $\geq 4$<br>(46 vs 4)            | Grade $\geq 4$<br>(16 vs <1)                      | (9 vs 2)                           | (28 vs 22)                    | 87 vs 95                                       | Sparano et al. NEJM 2008, 358:1663-71           |
| 00W                                            | <b>N-SAS BC02 (results only as %)</b><br>4AC/EC;4(D <sub>75</sub> vs P <sub>175</sub> ) q3 | 525     | NR                                      | Grade $\geq 3$<br>(0.4 vs 4.2)                                 | (19.5 vs 17.2)                         | (11.1 vs 5.7)                                     | (3.1 vs 3.8)                       | NR                            | 86.7 vs 86.7                                   | Watanabe et al Cancer 2017, 123:759-68          |
| 00W                                            | <b>N-SAS BC02 (results only as %)</b><br>8(D <sub>75</sub> vs P <sub>175</sub> ) q3        | 524     | NR                                      | Grade $\geq 3$<br>(3.8 vs 5.7)                                 | (6.9 vs 1.9)                           | (8.1 vs 1.9)                                      | (1.9 vs 1.9)                       | NR                            | 84.7 vs 86.7                                   | Watanabe et al Cancer 2017, 123:759-68          |
| 04R                                            | <b>HORG CT-04</b><br>4FE <sub>75</sub> C;4(D <sub>75</sub> vs P <sub>175</sub> ) q2        | 481     | NR                                      | 7 vs 11<br>(2.9 vs 4.6)                                        | 74 vs 51<br>(31 vs 23)                 | 4 vs 3<br>(1.7 vs 1.2)                            | 18 vs 20<br>(7.5 vs 8.3)           | (1.7 vs 2.8)                  | 96.3 vs 90                                     | Saloustris et al Br Can Res Trt 2014, 148:591-7 |
| <b>Docetaxel q1 vs paclitaxel q1</b>           |                                                                                            |         |                                         |                                                                |                                        |                                                   |                                    |                               |                                                |                                                 |
| 99V                                            | <b>ECOG E1199 (results only as %)</b><br>4AC;12(D <sub>35</sub> vs P <sub>80</sub> ) q1    | 2518    | (45 vs 28)                              | (16 vs 27)                                                     | $\geq$ Grade 4<br>(3 vs 2)             | $\geq$ Grade 4<br>(1 vs 1)                        | (11 vs 3)                          | (40 vs 29)                    | 75 vs 88                                       | Sparano et al. NEJM 2008, 358:1663-71           |
| 05C                                            | <b>HE10/05</b><br>3E <sub>110</sub> q2;3CMF; 9(D <sub>35</sub> vs P <sub>80</sub> ) q1     | 664     | NR                                      | Grade $\geq 3$<br>neurology<br>4 vs 4<br>(1.3 vs 1.3)          | 85 vs 85<br>(26.9 vs 26.6)             | 14 vs 17<br>(4.4 vs 5.3)                          | 7 vs 10<br>(2.2 vs 3.1)            | NR                            | 88.3 vs 88                                     | Fountzilias et al. BMC Cancer 2014, 14:515      |

**P59-60: Toxicity table 3** – Trials of paclitaxel or docetaxel in smaller fractions versus larger fractions. Selected toxicity reporting extracted from individual trial publications  
Where available results presented as n=number, (%), NR = not reported

|                                                 | Trial name                                                                                                                                                       | No. pts                                | All toxicity<br>Grade $\geq 3$<br>n (%) | Peripheral<br>Sensory<br>neuropathy<br>Grade $\geq 2$<br>n (%)               | Neutropenia<br>Grade $\geq 3$<br>n (%)            | Febrile<br>neutropenia<br>Grade $\geq 3$<br>n (%) | Fatigue<br>Grade $\geq 3$<br>n (%)            | Dose<br>modification<br>n (%) | Compliance<br>(%)<br>Completed all<br>taxane cycles | Reference                                     |
|-------------------------------------------------|------------------------------------------------------------------------------------------------------------------------------------------------------------------|----------------------------------------|-----------------------------------------|------------------------------------------------------------------------------|---------------------------------------------------|---------------------------------------------------|-----------------------------------------------|-------------------------------|-----------------------------------------------------|-----------------------------------------------|
| <b>Paclitaxel q1 versus Paclitaxel q2 or q3</b> |                                                                                                                                                                  |                                        |                                         |                                                                              |                                                   |                                                   |                                               |                               |                                                     |                                               |
| 98K                                             | <b>MDA 98-240</b><br>(results only as %)<br>(12P <sub>80/150/175</sub> q1 vs<br>4P <sub>225</sub> q3);4 FAC q3                                                   | 254                                    | NR                                      | (36.5* vs 51.2)<br>*80mg/m <sup>2</sup> dose                                 | NR                                                | (1 vs 9.5)                                        | NR                                            | NR                            | NR                                                  | Green et al. J Clin Oncol<br>2005, 23:5983-92 |
| 99V                                             | <b>ECOG E1199</b><br>(results only as %)<br>4AC; (12P <sub>80</sub> q1 vs<br>4P <sub>175</sub> q3)                                                               | 2530                                   | (28 vs 30)                              | (27 vs 20)                                                                   | Grade $\geq 4$<br>(2 vs 4)                        | Grade $\geq 4$<br>(1 vs <1)                       | (3 vs 2)                                      | (29 vs 22)                    | 88.0 vs 95.0                                        | Sparano et al. NEJM 2008,<br>358:1663-71      |
| 03*                                             | <b>SWOG S0221</b><br>(15A <sub>24</sub> C <sub>60dq1-7/</sub><br>6AC)q2; (12P <sub>80</sub> q1 v<br>6P <sub>175</sub> q2)                                        | 3294                                   | 414 vs 412<br>(36.3 vs<br>35.5)         | Grade $\geq 3$<br>119 vs 201<br>(10.5 vs 17.3)<br>(reported as<br>neurology) | 139 vs 22<br>(12.2 vs 1.9)*<br>*GCSF in q2<br>arm | 1 vs 2<br>(0.1 vs 0.2)                            | NR                                            | NR                            | 75.0 vs 71.0                                        | Budd et al. J Clin Oncol<br>2015, 33:58-64    |
| 05C                                             | <b>HE10/05</b><br>3E <sub>110</sub> q2;(3CMF q2;<br>9P <sub>80</sub> q1 vs 3P <sub>200</sub> q2;<br>3CMF q2)                                                     | 667                                    | NR                                      | Grade $\geq 3$<br>4 vs 16<br>(1.3 vs 4.9)<br>(reported as<br>neurology)      | 85 vs 99<br>(26.6 vs 30.4)                        | 17 vs 20<br>(5.3 vs 6.1)                          | 10 vs 4<br>(3.1 vs<br>1.2)                    | NR                            | 88.0 vs 93.6                                        | Fountzilas et al. BMC<br>Cancer 2014, 14:515  |
| <b>Docetaxel q1 or q2 vs Docetaxel q3</b>       |                                                                                                                                                                  |                                        |                                         |                                                                              |                                                   |                                                   |                                               |                               |                                                     |                                               |
| 99V                                             | <b>ECOG E1199</b><br>4AC; (12D <sub>35</sub> q1 vs<br>4D <sub>100</sub> q3)                                                                                      | 2522                                   | (45 vs 71)                              | (16 vs 16)                                                                   | Grade $\geq 4$<br>(3 vs 46)                       | Grade $\geq 4$<br>(1 vs 16)                       | (11 vs 9)                                     | (40 vs 28)                    | 75.0 vs 87.0                                        | Sparano et al. NEJM 2008,<br>358:1663-71      |
| 00^                                             | <b>U Hull / Lincoln CH</b><br>4AC; (12D <sub>33</sub> q1 vs<br>4D <sub>100</sub> q3)                                                                             | 82                                     | NR                                      | 0 vs 16<br>(0 vs 38.2)<br>Grade not<br>reported                              | 5/82 overall<br>(6)                               | 4/82<br>(5)                                       | 4 vs 7<br>(10 vs 17)<br>Grade not<br>reported | NR                            | 91.1 vs 93.2                                        | Walker et al. BMC Cancer<br>2011, 11:179      |
| 04Z                                             | <b>BREAST-10</b><br>12E <sub>30</sub> D <sub>35</sub> q1 vs<br>4E <sub>75</sub> D <sub>80</sub> q3<br>*reported for whole<br>trial (n=135)<br>including patients | 135 (44<br>in<br>outcomes<br>analysis) | NR                                      | 2 vs 1<br>(3 vs 1.4)                                                         | 11 vs 45<br>(16.7 vs 65.2)                        | 0 vs 2<br>(0 vs 2.9)                              | 1 vs 0<br>(1.4 vs 0)                          | NR                            | NR                                                  | Nuzzo et al. BMC Cancer<br>2011, 11:75        |

|     |                                                                                                                                                                                                   |    |                            |    |                       |                      |                      |                          |              |                                                    |
|-----|---------------------------------------------------------------------------------------------------------------------------------------------------------------------------------------------------|----|----------------------------|----|-----------------------|----------------------|----------------------|--------------------------|--------------|----------------------------------------------------|
|     | with metastatic disease                                                                                                                                                                           |    |                            |    |                       |                      |                      |                          |              |                                                    |
| 05@ | <b>UZ Leuven Belgium</b><br>(4F <sub>375</sub> E <sub>75</sub> C <sub>375</sub> ;4D <sub>75</sub> or vv) q2 vs (3F <sub>500</sub> E <sub>100</sub> C <sub>500</sub> ; 3D <sub>100</sub> or vv) q3 | 85 | 24 vs 15<br>(30.7 vs 38.4) | NR | 5 vs 8<br>(6.4 vs 21) | 0 vs 2<br>(0 vs 5.1) | 8 vs 0<br>(7.7 vs 0) | 10 vs 3<br>(12.8 vs 7.9) | 94.8 vs 97.4 | Wildiers et al Breast Can Res Trt 2009, 114:103-12 |

## **P61-91: Statistical Analysis Plan**

### **Statistical Analysis Plan for a Meta-Analysis of randomised trials comparing anthracycline and taxane containing chemotherapy regimens for early breast cancer**

This meta-analysis aims to compare the long-term benefits and risks of different anthracycline and taxane containing chemotherapy regimens for early breast cancer

#### **Cohort definitions**

The current list of trials contributing to these 8 cohorts are shown in Appendix 1.

**Cohort 1. Taxane with and without anthracycline:** randomised trials that compare any taxane plus anthracycline regimen versus any taxane regimen without anthracycline.

**Cohort 2. Anthracycline with taxane versus anthracycline regimens without taxane:** randomised trials that compare any anthracycline plus taxane regimen versus any anthracycline regimen without taxane.

**Cohort 3. Taxane versus anthracycline:** randomised trials that compare any taxane regimen without anthracycline versus any anthracycline regimen without taxane.

**Cohort 4. Head-to-head taxane comparisons:** randomised trials with head-to-head comparisons between different taxanes (docetaxel versus paclitaxel).

**Cohort 5. Dose fractionation:** randomised trials that compare taxane regimens with similar cumulative doses but different scheduling (i.e. small more frequent versus larger less frequent).

**Cohort 6. Sequencing of sequential anthracycline and taxane chemotherapy:** randomised trials of anthracycline then taxane versus the same drug regimens in the opposite order.

**Cohort 7. Longer versus shorter duration of anthracycline:** randomised trials comparing longer versus shorter duration of anthracycline based chemotherapy.

**Cohort 8. Higher versus lower dose of anthracycline:** randomised trials comparing higher versus lower doses of anthracycline chemotherapy.

#### **Analysis population**

The analysis population will be women with early stage (i.e. operable) or locally advanced breast cancer where treatment is administered with curative intent. Data will be sought from all relevant randomised trials with greater than 10 women randomised, irrespective of primary outcome measure.

#### **Data checking**

The usual EBCTCG quality assurance checks for range, consistency and balance between randomisation arms will be undertaken prior to analysis. The dependence of deaths without recorded recurrence and of second cancers (overall and by site) on TN status will also be investigated with any association used to estimate what proportion might actually have been from breast cancer. Checks will be undertaken to compare the incidence of death without recurrence and of second cancers (overall and by site) by age group in each trial to characterise whether these might include miscoded breast cancer events.

#### **Analyses**

Primary analyses will be by Intention to Treat (ITT), including all randomised patients irrespective of treatment compliance.

The data variables to be requested from each trial are detailed in Appendix 2.

#### **Primary outcomes**

The main endpoint definitions and methods are those used in previous EBCTCG reports.

**1. Time to recurrence:** includes distant recurrence, invasive loco-regional recurrence and new second primary invasive breast cancer (ipsilateral or contralateral), and the definitions of these will be as in each trial.

**2. Breast cancer mortality:** information about mortality rates without recurrence will be subtracted from information about overall mortality rates, estimated by log-rank subtraction (as in previous EBCTCG reports). The same statistical methods will be used to construct Kaplan-Meier graphs that estimate breast cancer mortality (i.e. the pattern of

mortality that would have been seen if it had been possible to avoid all deaths before or after recurrence from causes other than breast cancer).

**3. Death without recurrence:** i.e. without the EBCTCG secretariat having any record of recurrence. The quality of the recurrence data in these trials is likely to be reasonably good, deaths from wholly unknown cause without recorded recurrence will be treated as death from an unknown cause that was not breast cancer.

#### **4. All-cause mortality**

##### **Exploratory endpoints**

**1. Time to first distant recurrence:** includes distant recurrence and ignores any prior loco-regional or contralateral recurrences.

**2. Time to loco-regional recurrence as first event:** includes ipsilateral breast, chest wall and loco-regional lymph nodes (axilla and SCF).

**3. Time to new contralateral recurrence**

#### **4. AML incidence**

**5. Incidence and site of second cancers:** Information on the site of other non-breast second primary before any recurrence of breast cancer will be collected. Categorisation of sites will include but is not limited to: haematological, lung, colorectal, GI, gynaecological, urological.

**6. Safety** – Data on other non-fatal adverse events (e.g. ischaemic heart disease, stroke, pulmonary embolus, DVT) will be sought and analysed.

##### **Subgroup Analyses**

Pre-specified subgroup analyses will be undertaken but, given the well-known hazards of subgroup analysis, will be interpreted appropriately cautiously. Investigation of potential interactions between tumour or patient characteristics and treatment efficacy will be undertaken with breast cancer recurrence as primary outcome.

**Subgroup Analyses of Recurrence** Forest plots for subgroup analyses by:

- Site of first recurrence (distant metastasis, invasive loco-regional recurrence or contralateral breast cancer)
- Period of follow-up (years 0-1, 2-4, 5-9, and 10+ after randomisation)
- Age (<45, 45-54, 55-64, 65+);
- ER status (ER-, ER+, ER unknown);
- ER/PR status (ER+/PR- vs ER+/PR+)
- Nodal status (N0/N-, N1-3, N4+, N unknown);
- Tumour size (T1, T2, T3/T4);
- Tumour grade (well-differentiated, moderately differentiated, poorly differentiated);
- Proliferation index (%Ki-67 0-9, 10-19, 20-49, 50+)
- HER2 status (HER2-, HER2+, unknown)
- Tumour histology (ductal, lobular, other, unknown)
- BMI (<20, 20-<25, 25-<30, 30+)

##### **Statistical analyses**

If a log-rank statistic (observed [o]-expected [e]) have variance  $v$ , then defining  $z=(o-e)/\sqrt{v}$  and  $b=(o-e)/v$ , where  $b$  has variance  $1/v$ , the outcome RR is estimated as  $\exp(b)$  with  $SE=(RR-1)/z$ . 95% CIs and 99% CIs for RRs are derived from those for  $b$  (by normal approximations). Two-sided significance with  $p$  values of less than 0.05 were considered significant for analyses of the primary and secondary outcomes, and to compensate for multiple investigations,  $p$  values of less than 0.01 were considered significant for subgroup analyses.

##### **Tests of heterogeneity and of trend**

First calculate the log-rank statistic  $(o-e)$  and its variance  $v$  in each separate stratum, and add these up to get the overall logrank  $(O-E)$  and its variance  $V$  (i.e. the sum of the separate variances). Delete any uninformative strata (i.e. those for which  $v$  is zero), and number the remaining strata from 1 to  $n$ . A  $\chi^2$  test (on  $n-1$  degrees of freedom) for

heterogeneity between the treatment effects in different strata can be obtained by subtracting  $(O-E)^2/V$  from the sum of the separate values, one per stratum, of  $(o-e)^2/v$ .

Alternatively, a  $\chi^2$  test for trend (i.e. for whether the treatment effect changes progressively from one stratum to the next) will be calculated as follows: if the stratum numbered  $s$  has logrank statistics  $(o-e)$  and  $v$  then define  $m$ , the mean stratum number, to be the sum, one term per stratum, of  $sv/V$  and define  $T$  to be the sum, one term per stratum, of  $(s-m)(o-e)$ . The variance of  $T$ ,  $\text{var}(T)$ , is then the sum, one term per stratum, of  $(s-m)^2v$ , and the  $\chi^2$  test (on 1 degree of freedom) for trend is  $T^2/\text{var}(T)$ . If there are only two strata then the tests for trend and heterogeneity are identical.

## Appendix 1. Taxane trial list, updated to November 2019

### Cohort1: Taxane + Anthracycline vs Taxane without Anthracycline

| Trial & year code                                                                                             | Trial name                                                                  | Comparisons                                                                                                                                                                                                                                                                                                                                                                                                                                                                                                                                                                                                                                                                                | N    | Received         | Published   |
|---------------------------------------------------------------------------------------------------------------|-----------------------------------------------------------------------------|--------------------------------------------------------------------------------------------------------------------------------------------------------------------------------------------------------------------------------------------------------------------------------------------------------------------------------------------------------------------------------------------------------------------------------------------------------------------------------------------------------------------------------------------------------------------------------------------------------------------------------------------------------------------------------------------|------|------------------|-------------|
| <b>(a) Concurrent docetaxel plus anthracycline versus same dose docetaxel plus cyclophosphamide</b>           |                                                                             |                                                                                                                                                                                                                                                                                                                                                                                                                                                                                                                                                                                                                                                                                            |      |                  |             |
| 34206<br>2007&                                                                                                | USO 06090 / 11271, USA                                                      | (Docetaxel [75 mg/m <sup>2</sup> iv] d1 + Doxorubicin [50 mg/m <sup>2</sup> iv] d1 + Cyclophosphamide [600 mg/m <sup>2</sup> iv] d1) q3wk x 6 vs (Docetaxel [75 mg/m <sup>2</sup> iv] d1 + Cyclophosphamide [600 mg/m <sup>2</sup> iv] d1) q3wk x 6                                                                                                                                                                                                                                                                                                                                                                                                                                        | 1296 | Yes              | ✓ 2017[1]   |
| 4772<br>2009J1                                                                                                | NSABP B-46-I, USA                                                           | Docetaxel [75 mg/m <sup>2</sup> iv] + Doxorubicin [50 mg/m <sup>2</sup> iv] + Cyclophosphamide [500 mg/m <sup>2</sup> ] + pegfilgrastim [6 mg sc d2] q21d x 6 vs Docetaxel [75 mg/m <sup>2</sup> iv] + Cyclophosphamide [600 mg/m <sup>2</sup> ] q21d x 6                                                                                                                                                                                                                                                                                                                                                                                                                                  | 1077 | Yes              | ✓ 2017[1]   |
| 46701<br>2009R                                                                                                | NATT / NCT00912444, Shanghai Jiao Tong University School of Medicine, China | (Docetaxel [75mg/m <sup>2</sup> iv] + (Doxorubicin [50mg/m <sup>2</sup> iv] or Epirubicin [60 mg/m <sup>2</sup> iv]) + Cyclophosphamide [500 mg/m <sup>2</sup> iv] + G-CSF) q3wk x 6 preoperative vs (Docetaxel [75mg/m <sup>2</sup> iv] + Cyclophosphamide [600 mg/m <sup>2</sup> iv] + G-CSF) q3wk x 6 preoperative                                                                                                                                                                                                                                                                                                                                                                      | 96   | Yes              | ✓ 2016[2]   |
| <b>(b) Sequential taxane plus anthracycline versus higher cumulative dose docetaxel plus cyclophosphamide</b> |                                                                             |                                                                                                                                                                                                                                                                                                                                                                                                                                                                                                                                                                                                                                                                                            |      |                  |             |
| 38406<br>2007I                                                                                                | HORG CT/07.17, Greece                                                       | (5-fluorouracil [500mg/m <sup>2</sup> ] + Epirubicin [75mg/m <sup>2</sup> ] + Cyclophosphamide [500mg/m <sup>2</sup> ]) q3wk x 4 then Docetaxel [75mg/m <sup>2</sup> ]q2wk x 4 vs (Docetaxel [75mg/m <sup>2</sup> ] + Cyclophosphamide [500mg/m <sup>2</sup> ]) q2wk x 6                                                                                                                                                                                                                                                                                                                                                                                                                   | 650  | Yes - ineligible | ✓ 2016[116] |
| 2225<br>2008L                                                                                                 | DBCg 07 READ, Denmark                                                       | (Epirubicin [90 mg/m <sup>2</sup> iv] + Cyclophosphamide [600 mg/m <sup>2</sup> iv]) q3wk x 3 then docetaxel [100 mg/m <sup>2</sup> iv] q3wk x 3 vs (Cyclophosphamide [600 mg/m <sup>2</sup> iv] + Docetaxel [75 mg/m <sup>2</sup> iv]) q3wk x 6                                                                                                                                                                                                                                                                                                                                                                                                                                           | 2012 | Yes              | ✓ 2017[3]   |
| 50702<br>2008]                                                                                                | Shiga Anthracycline trial                                                   | Docetaxel [100mg/m <sup>2</sup> ] q3wk x 3 then (5-Fluorouracil [500 mg/m <sup>2</sup> ] + Epirubicin [100 mg/m <sup>2</sup> ] + Cyclophosphamide [500 mg/m <sup>2</sup> ]) q3wk x 3 vs (Docetaxel [75mg/m <sup>2</sup> ] + Cyclophosphamide [600 mg/m <sup>2</sup> ]) q3wk x 6                                                                                                                                                                                                                                                                                                                                                                                                            | 42   | No - ineligible  | ✓ 2013[4]   |
| 51701<br>2009&                                                                                                | Kanagawa Japan                                                              | (5-Fluorouracil [500 mg/m <sup>2</sup> iv d1] + Epirubicin [100 mg/m <sup>2</sup> d1] + Cyclophosphamide [500 mg/m <sup>2</sup> iv d1]) q21d x 3 then Docetaxel [100mg/m <sup>2</sup> iv d1] q21d x 3 preoperative vs (Cyclophosphamide [600mg/m <sup>2</sup> iv d1] + Docetaxel [75 mg/m <sup>2</sup> ]) q21d x 6 preoperative                                                                                                                                                                                                                                                                                                                                                            | 103  | Yes              | ✓ 2019[5]   |
| 4774<br>2009J2                                                                                                | NSABP B-49, USA                                                             | ((Docetaxel [75 mg/m <sup>2</sup> ] + doxorubicin [50 mg/m <sup>2</sup> ] + cyclophosphamide [500 mg/m <sup>2</sup> iv] q3wk x 6) or ((Doxorubicin [60 mg/m <sup>2</sup> ] + cyclophosphamide [600 mg/m <sup>2</sup> iv] q3wk x 4 then paclitaxel [80 mg/m <sup>2</sup> iv] qwk x 12) or ((Doxorubicin [60 mg/m <sup>2</sup> ] + cyclophosphamide [600 mg/m <sup>2</sup> iv] q2wk x 4 then paclitaxel [80 mg/m <sup>2</sup> iv] qwk x 12) or ((Doxorubicin [60 mg/m <sup>2</sup> ] + cyclophosphamide [600 mg/m <sup>2</sup> iv] q2wk x 4 then paclitaxel [175 mg/m <sup>2</sup> iv] q2wk x 4) vs Docetaxel [75 mg/m <sup>2</sup> iv] + Cyclophosphamide [600 mg/m <sup>2</sup> ] q21d x 6 | 1870 | Yes              | ✓ 2017[1]   |
| 33810<br>2009E1                                                                                               | SUCCESS C, Ludwig-Maximilians University, Germany                           | (5-Fluorouracil [500 mg/m <sup>2</sup> iv] + Epirubicin [100 mg/m <sup>2</sup> iv] + Cyclophosphamide [500 mg/m <sup>2</sup> iv]) q3wk x 3 then Docetaxel [100 mg/m <sup>2</sup> iv] q3wk x 3 vs (Docetaxel [75 mg/m <sup>2</sup> iv] + Cyclophosphamide [600 mg/m <sup>2</sup> iv]) q3wk x 6                                                                                                                                                                                                                                                                                                                                                                                              | 3643 | Yes              | ✓ 2018[6]   |



|                                                                   |                                                                                            |                                                                                                                                                                                                                                                                                                                                                                                                                                                                                                                                                                                                                                                                                                                                                                                                                                                                                                                                                                                                                                                                                                    |      |                  |            |
|-------------------------------------------------------------------|--------------------------------------------------------------------------------------------|----------------------------------------------------------------------------------------------------------------------------------------------------------------------------------------------------------------------------------------------------------------------------------------------------------------------------------------------------------------------------------------------------------------------------------------------------------------------------------------------------------------------------------------------------------------------------------------------------------------------------------------------------------------------------------------------------------------------------------------------------------------------------------------------------------------------------------------------------------------------------------------------------------------------------------------------------------------------------------------------------------------------------------------------------------------------------------------------------|------|------------------|------------|
| 30906<br>2009M                                                    | WSG Plan B, Germany                                                                        | (Epirubicin [90 mg/m <sup>2</sup> ] + Cyclophosphamide [600 mg/m <sup>2</sup> ]) q3wk × 4 then Docetaxel [100 mg/m <sup>2</sup> ] q3wk × 4 vs (Docetaxel [75 mg/m <sup>2</sup> ] + Cyclophosphamide [600 mg/m <sup>2</sup> ]) q3wk × 6                                                                                                                                                                                                                                                                                                                                                                                                                                                                                                                                                                                                                                                                                                                                                                                                                                                             | 2449 | Yes              | ✓ 2019[7]  |
| 48102<br>2009U                                                    | JBCRG-10, Japan Breast Cancer Research Group                                               | (5-fluorouracil [500mg/m <sup>2</sup> ] + epirubicin [100mg/m <sup>2</sup> ] + cyclophosphamide [500mg/m <sup>2</sup> ] q3wk) × 4 then (docetaxel [75mg/m <sup>2</sup> ] + cyclophosphamide [600mg/m <sup>2</sup> ] q3wk + trastuzumab [4mg/kg loading dose then 2mg/kg thereafter] qwk or [8mg/kg loading dose then 6mg/kg thereafter q3wk]) × 4 preoperative or (docetaxel [75mg/m <sup>2</sup> ] + cyclophosphamide [600mg/m <sup>2</sup> ] q3wk + trastuzumab [4mg/kg loading dose then 2mg/kg thereafter] qwk or [8mg/kg loading dose then 6mg/kg thereafter q3wk]) × 4 then (5-fluorouracil [500mg/m <sup>2</sup> ] + epirubicin [100mg/m <sup>2</sup> ] + cyclophosphamide [500mg/m <sup>2</sup> ] q3wk) × 4 preoperative vs (docetaxel [75mg/m <sup>2</sup> ] + cyclophosphamide [600mg/m <sup>2</sup> ] q3wk + trastuzumab [4mg/kg loading dose then 2mg/kg thereafter] qwk or [8mg/kg loading dose then 6mg/kg thereafter q3wk]) × 4 then (5-fluorouracil [500mg/m <sup>2</sup> ] + epirubicin [100mg/m <sup>2</sup> ] + cyclophosphamide [500mg/m <sup>2</sup> ] q3wk) × 4 preoperative | 67   | Yes              | ✓ 2020[8]  |
| 48103<br>2009V                                                    | JBCRG-09, Japan Breast Cancer Research Group                                               | (5-Fluoro-Uracil [500 mg/m <sup>2</sup> ] + Epirubicin [100 mg/m <sup>2</sup> ] + Cyclophosphamide [500 mg/m <sup>2</sup> ]) q3wk × 3 then (Docetaxel [75 mg/m <sup>2</sup> ] + Cyclophosphamide [600 mg/m <sup>2</sup> ]) q3wk × 3 preoperative or (Docetaxel [75 mg/m <sup>2</sup> ] + Cyclophosphamide [600 mg/m <sup>2</sup> ]) q3wk × 3 then (5-Fluoro-Uracil [500 mg/m <sup>2</sup> ] + Epirubicin [100 mg/m <sup>2</sup> ] + Cyclophosphamide [500 mg/m <sup>2</sup> ]) q3wk × 3 preoperative vs (Docetaxel [75 mg/m <sup>2</sup> ] + Cyclophosphamide [600 mg/m <sup>2</sup> ]) q3wk × 6 preoperative                                                                                                                                                                                                                                                                                                                                                                                                                                                                                      | 195  | Yes              | ✓ 2020[9]  |
| 36509<br>2010V                                                    | Fudan BC MASTER / NCT01314833, Fudan University, Shanghai, China                           | (Cyclophosphamide [500 mg/m <sup>2</sup> d1] + Epirubicin [90-100 mg/m <sup>2</sup> d1] + Fluorouracil [500 mg/m <sup>2</sup> d1]) q21d × 3 then Docetaxel [100 mg/m <sup>2</sup> d1] q21d × 3 vs (Cyclophosphamide [600 mg/m <sup>2</sup> d1] + Docetaxel [75 mg/m <sup>2</sup> d1]) q21d × 6                                                                                                                                                                                                                                                                                                                                                                                                                                                                                                                                                                                                                                                                                                                                                                                                     | 1047 | Yes              | ✓ 2021[10] |
| <b>(c) Taxane plus anthracycline versus taxane ± capecitabine</b> |                                                                                            |                                                                                                                                                                                                                                                                                                                                                                                                                                                                                                                                                                                                                                                                                                                                                                                                                                                                                                                                                                                                                                                                                                    |      |                  |            |
| 35901<br>2000W                                                    | N-SAS BC 02, Japan                                                                         | ((Doxorubicin [60mg/m <sup>2</sup> ] or Epirubicin [75mg/m <sup>2</sup> ]) + Cyclophosphamide [600mg/m <sup>2</sup> ]) q3wk × 4 then (Paclitaxel [175mg/m <sup>2</sup> ] or Docetaxel [75mg/m <sup>2</sup> ]) q3wk × 4 vs (Paclitaxel [175mg/m <sup>2</sup> ] or Docetaxel [75mg/m <sup>2</sup> ]) q3wk × 8                                                                                                                                                                                                                                                                                                                                                                                                                                                                                                                                                                                                                                                                                                                                                                                        | 1060 | Yes              | ✓ 2017[11] |
| 36901<br>2001V                                                    | Multicentre France Neoadjuvant Trial, France                                               | (Epirubicin[100mg/m <sup>2</sup> ] + Docetaxel [75mg/m <sup>2</sup> ] + filgrastim) q3wk × 6 maximum preoperative vs Docetaxel [100mg/m <sup>2</sup> ] q3wk × 8 maximum preoperative                                                                                                                                                                                                                                                                                                                                                                                                                                                                                                                                                                                                                                                                                                                                                                                                                                                                                                               | 21   | No               | ✓ 2004[12] |
| 54201<br>2005]                                                    | Asan Neoadjuvant Capecitabine trial, University of Ulsan College of Medicine, Seoul, Korea | (Doxorubicin [60 mg/m <sup>2</sup> d1] + Cyclophosphamide [600 mg/m <sup>2</sup> d1]) q3wk × 4 then Docetaxel [75 mg/m <sup>2</sup> ] q3wk × 4 preoperative vs (Capecitabine [2000 mg/m <sup>2</sup> d1-14] + Vinorelbine [25 mg/m <sup>2</sup> d1,8]) q 3wk × 4 then Docetaxel [75 mg/m <sup>2</sup> ] q3wk × 4 preoperative                                                                                                                                                                                                                                                                                                                                                                                                                                                                                                                                                                                                                                                                                                                                                                      | 75   | No               | ✓ 2015[13] |
| 6332<br>2006Z1&3                                                  | EORTC 10041 / BIG 3-04 / MINDACT, Belgium                                                  | (Fluorouracil [500 mg/m <sup>2</sup> iv] + Epirubicin [100 mg/m <sup>2</sup> iv] + Cyclophosphamide [500 mg/m <sup>2</sup> iv]) d1 q3wk × 3; Docetaxel [?? mg/m <sup>2</sup> iv d1] q3wk × 3 vs Docetaxel [75 mg/m <sup>2</sup> iv d1] + Capecitabine [1650 mg/m <sup>2</sup> po d1-14] q3wk × 6                                                                                                                                                                                                                                                                                                                                                                                                                                                                                                                                                                                                                                                                                                                                                                                                   | 392  | Yes              | ✓ 2021[14] |
| 37004<br>2009[2                                                   | Remagus 04, France                                                                         | FEC × 4 then Docetaxel × 4 preoperative vs Docetaxel-capecitabine × 6 preoperative                                                                                                                                                                                                                                                                                                                                                                                                                                                                                                                                                                                                                                                                                                                                                                                                                                                                                                                                                                                                                 | 100  | No               | 2012[15]   |
| 52106<br>2009~6                                                   | TaiNAC, Taiwan                                                                             | (Docetaxel [35 mg/m <sup>2</sup> iv] + Epirubicin [45 mg/m <sup>2</sup> iv]) d1+8 × 4 preoperative vs (Docetaxel [35 mg/m <sup>2</sup> ] + 5-Fluorouracil [2000mg/m <sup>2</sup> ] + Leucovorin [300 mg/m <sup>2</sup> ]) d1+8 × 4 preoperative                                                                                                                                                                                                                                                                                                                                                                                                                                                                                                                                                                                                                                                                                                                                                                                                                                                    | 10   | Yes – ineligible | No         |

|                                                                                  |                                                                       |                                                                                                                                                                                                                                                                                                                                                                                                                                                                                                                                                                                                                                                                                                                                                                                                                                                                 |      |                  |                     |
|----------------------------------------------------------------------------------|-----------------------------------------------------------------------|-----------------------------------------------------------------------------------------------------------------------------------------------------------------------------------------------------------------------------------------------------------------------------------------------------------------------------------------------------------------------------------------------------------------------------------------------------------------------------------------------------------------------------------------------------------------------------------------------------------------------------------------------------------------------------------------------------------------------------------------------------------------------------------------------------------------------------------------------------------------|------|------------------|---------------------|
| 2630<br>2011K                                                                    | ABCSG-32, Austria                                                     | (Docetaxel [100 mg/m <sup>2</sup> iv] + Pegfilgrastim [6mg sc d2] + Trastuzumab [8mg/kg loading dose then 6mg/kg iv] + non-pegylated liposomal Doxorubicin [50mg/m <sup>2</sup> iv] q21d x 6 preoperative or (Docetaxel [100 mg/m <sup>2</sup> iv] + Pegfilgrastim [6mg sc d2] + Trastuzumab [8mg/kg loading dose then 6mg/kg iv] + non-pegylated liposomal Doxorubicin [50mg/m <sup>2</sup> iv] + Bevacizumab [15 mg/kg]) q21d x 6 preoperative vs (Docetaxel [100 mg/m <sup>2</sup> iv] + Pegfilgrastim [6mg sc d2] + Trastuzumab [8mg/kg loading dose then 6mg/kg iv] + non-pegylated liposomal Doxorubicin [50mg/m <sup>2</sup> iv] + Bevacizumab [15 mg/kg]) q21d x 6 preoperative or (Docetaxel [100 mg/m <sup>2</sup> iv] + Pegfilgrastim [6mg sc d2] + Trastuzumab [8mg/kg loading dose then 6mg/kg iv] + Bevacizumab [15 mg/kg]) q21d x 6 preoperative | 100  | Yes - ineligible | ✓ Abstract 2015[16] |
| 54101<br>2011N                                                                   | PUMCH-Breast-TCX / NCT01354522, Beijing                               | Docetaxel [75 mg/m <sup>2</sup> iv d1] + (Doxorubicin [50 mg/m <sup>2</sup> iv d1] or Epirubicin [75 mg/m <sup>2</sup> iv d1]) + Cyclophosphamide [500 mg/m <sup>2</sup> iv d1] q3wk x 6 vs Docetaxel [75 mg/m <sup>2</sup> iv d1] + Cyclophosphamide [500 mg/m <sup>2</sup> iv d1] + Capecitabine [950 mg/m <sup>2</sup> bid po d1-14] q3wk x 6                                                                                                                                                                                                                                                                                                                                                                                                                                                                                                                | 400  | No               | No                  |
| <b>(d) Taxane plus anthracycline versus taxane plus carboplatin (confounded)</b> |                                                                       |                                                                                                                                                                                                                                                                                                                                                                                                                                                                                                                                                                                                                                                                                                                                                                                                                                                                 |      |                  |                     |
| 33505<br>2001M                                                                   | BCIRG 006, TRIO (formerly Breast Cancer International Research Group) | (Doxorubicin [60mg/m <sup>2</sup> ] + Cyclophosphamide [600mg/m <sup>2</sup> ]) q21d x 4 then (Docetaxel [100mg/m <sup>2</sup> ] q21d x 4 + Trastuzumab [4-2mg/kg/wk] qwk x 12) then Trastuzumab [6mg/kg] q21d until 1 yr vs (Docetaxel [75mg/m <sup>2</sup> ] + (Cis-Platinum [75mg/m <sup>2</sup> ] or Carboplatin [AUC 6])) q21d x 6 + Trastuzumab [4-2mg/kg/wk] qwk x 18 then Trastuzumab [6mg/kg] q21d until 1 yr                                                                                                                                                                                                                                                                                                                                                                                                                                          | 2149 | Yes              | ✓ 2011[18]          |
| 22311<br>2006~                                                                   | CAMS Neoadjuvant Paclitaxel trial, Beijing, China                     | (Paclitaxel [175 mg/m <sup>2</sup> iv d1] + Epirubicin [75 mg/m <sup>2</sup> iv d1]) q21d x 2-6 cycles preoperative vs (Paclitaxel [175 mg/m <sup>2</sup> iv d1] + carboplatin [AUC 5 iv d2]) q21d x 2-6 cycles preoperative                                                                                                                                                                                                                                                                                                                                                                                                                                                                                                                                                                                                                                    | 80   | No               | ✓ 2016[19]          |
| 43903<br>2009T                                                                   | TRYPHAENA, Basel, Switzerland                                         | (Pertuzumab [840 mg then 420 mg iv q3wk] + Trastuzumab [8mg/kg iv then 6mg/kg q3wk iv]) x 6 + ((5-Fluoro-Uracil [500 mg/m <sup>2</sup> iv] + Epirubicin [100 mg/m <sup>2</sup> iv] + Cyclophosphamide [500 mg/m <sup>2</sup> iv]) for cycles 1-3 then Docetaxel [75 mg/m <sup>2</sup> iv then 100 mg/m <sup>2</sup> iv q3wk] for cycles 4-6) preoperative then Trastuzumab [6mg/kg iv] q3wk to 1 yr vs (Trastuzumab [8mg/kg iv then 6mg/kg iv] + Pertuzumab [840 mg then 420 mg iv] + Carboplatin [AUC6] + Docetaxel [75 mg/m <sup>2</sup> ]) q3w x 6 preoperative then Trastuzumab [6mg/kg iv] q3wk to 1 yr                                                                                                                                                                                                                                                    | 225  | No               | ✓ 2013[20]          |
| 52107<br>2009~7                                                                  | TaiNAC, Taiwan                                                        | (Docetaxel [35 mg/m <sup>2</sup> iv] + Epirubicin [45 mg/m <sup>2</sup> iv]) d1+8 x 4 preoperative vs (Docetaxel [35 mg/m <sup>2</sup> ] + Cisplatin [35 mg/m <sup>2</sup> iv]) d1+8 x 4 preoperative                                                                                                                                                                                                                                                                                                                                                                                                                                                                                                                                                                                                                                                           | 8    | Yes – ineligible | No                  |
| 22309<br>2010U                                                                   | CH-BC-007 / NCT01150513, Beijing, China                               | Epirubicin [90 mg/m <sup>2</sup> d1] + Cyclophosphamide [600 mg/m <sup>2</sup> d1] q3wk x 4 then Docetaxel [100 mg/m <sup>2</sup> d1] q3wk x 4 vs Docetaxel [75 mg/m <sup>2</sup> d1] + Carboplatin [AUC 5 d1] q3wk x 6                                                                                                                                                                                                                                                                                                                                                                                                                                                                                                                                                                                                                                         | 298  | No               | ✓ 2016[21]          |
| 36505<br>2011H                                                                   | Fudan Pay/NCT01428414, Fudan University, Shanghai, China              | (Trastuzumab [4 mg/kg loading dose then 2 mg/kg iv] + paclitaxel [75 mg/m <sup>2</sup> ]) qwk x 3 + epirubicin [75 mg/m <sup>2</sup> ] q3wk x 4 or 6 cycles preoperative vs (Trastuzumab [4 mg/kg loading dose then 2 mg/kg iv] + paclitaxel [75 mg/m <sup>2</sup> ] + carboplatin [AUC 2]) qwk x 12 or 18 preoperative                                                                                                                                                                                                                                                                                                                                                                                                                                                                                                                                         | 100  | No               | 2015[22]            |
| 22310<br>2011M                                                                   | CH-BC-012 / NCT01378533, Beijing, China                               | (Epirubicin [80 mg/m <sup>2</sup> iv d1 or divided over 2d] + Cyclophosphamide [600 mg/m <sup>2</sup> iv d1] + G-CSF [3 mcg/kg d5-9]) q14d x 4 then (Paclitaxel [175 mg/m <sup>2</sup> iv d1] + G-CSF [3 mcg/kg d5-9]) q14d x 4 vs (Paclitaxel [150 mg/m <sup>2</sup> iv d1] + Carboplatin [AUC=3 iv d2] + G-CSF [3 mcg/kg d5-9]) q14d x 8                                                                                                                                                                                                                                                                                                                                                                                                                                                                                                                      | 132  | No               | ✓ Abstract 2019[17] |

|                |                                                                   |                                                                                                                                                                                                                                                                      |     |     |            |
|----------------|-------------------------------------------------------------------|----------------------------------------------------------------------------------------------------------------------------------------------------------------------------------------------------------------------------------------------------------------------|-----|-----|------------|
| 36510<br>2001R | Fudan PATTERN / NCT01216111,<br>Fudan University, Shanghai, China | Cyclophosphamide [500mg/m <sup>2</sup> ] + Epirubicin [100mg/m <sup>2</sup> ] + Fluorouracil [500mg/m <sup>2</sup> ] q3wk × 3 then Docetaxel [100mg/m <sup>2</sup> wk] q3wk × 3 vs Paclitaxel [80mg/m <sup>2</sup> d1,8,16] + Carboplatin [AUC = 2 d1,8,16] q4wk × 6 | 647 | Yes | ✓ 2020[23] |
|----------------|-------------------------------------------------------------------|----------------------------------------------------------------------------------------------------------------------------------------------------------------------------------------------------------------------------------------------------------------------|-----|-----|------------|

## Cohort 2: Anthracycline with taxane versus anthracycline regimens without taxane

| Trial & year code                                                                                | Trial name                            | Comparisons                                                                                                                                                                                                                                                                                                                                                                                                                                                                                                                                                                                                                                                                                                                                                                                                                                                 | N    | Received | Published  |
|--------------------------------------------------------------------------------------------------|---------------------------------------|-------------------------------------------------------------------------------------------------------------------------------------------------------------------------------------------------------------------------------------------------------------------------------------------------------------------------------------------------------------------------------------------------------------------------------------------------------------------------------------------------------------------------------------------------------------------------------------------------------------------------------------------------------------------------------------------------------------------------------------------------------------------------------------------------------------------------------------------------------------|------|----------|------------|
| <b>(a) Taxane plus anthracycline based regimen vs the SAME non-taxane cytotoxic chemotherapy</b> |                                       |                                                                                                                                                                                                                                                                                                                                                                                                                                                                                                                                                                                                                                                                                                                                                                                                                                                             |      |          |            |
| 8316<br>1994D                                                                                    | CALGB Study 9344 / Intergroup<br>0148 | (Cyclophosphamide [600mg/m <sup>2</sup> ] + Doxorubicin [90mg/m <sup>2</sup> ] + filgrastim [5 or 10µg/kg/d sc d2-12]) q3wk × 4 then Paclitaxel [175mg/m <sup>2</sup> ] q3wk × 4 vs (Cyclophosphamide [600mg/m <sup>2</sup> ] + Doxorubicin [90mg/m <sup>2</sup> ] + filgrastim [5 or 10µg/kg/d sc d2-12]) q3wk × 4<br>Or<br>(Cyclophosphamide [600mg/m <sup>2</sup> ] + Doxorubicin [75mg/m <sup>2</sup> ]) q3wk × 4 then Paclitaxel [175mg/m <sup>2</sup> ] q3wk × 4 vs (Cyclophosphamide [600mg/m <sup>2</sup> ] + Doxorubicin [75mg/m <sup>2</sup> ]) q3wk × 4<br>Or<br>(Cyclophosphamide [600mg/m <sup>2</sup> ] + Doxorubicin [60mg/m <sup>2</sup> ]) q3wk × 4 then Paclitaxel [175mg/m <sup>2</sup> ] q3wk × 4 vs (Cyclophosphamide [600mg/m <sup>2</sup> ] + Doxorubicin [60mg/m <sup>2</sup> ]) q3wk × 4                                           | 3170 | Yes      | ✓ 2003[24] |
| 4747<br>1995J                                                                                    | NSABP B-27, USA                       | ((Doxorubicin [60mg/m <sup>2</sup> ] + Cyclophosphamide [600mg/m <sup>2</sup> ]) q21d × 4 preoperative then Docetaxel [100mg/m <sup>2</sup> ] q21d × 4 preoperative then (Lumpectomy + RT) or Mastectomy) + Tamoxifen [20mg/d] × 5yr or ((Doxorubicin [60mg/m <sup>2</sup> ] + Cyclophosphamide [600mg/m <sup>2</sup> ]) q21d × 4 preoperative then (Lumpectomy + RT) or Mastectomy) then Docetaxel [100mg/m <sup>2</sup> ] q21d × 4 + Tamoxifen [20mg/d] × 5yr vs ((Doxorubicin [60mg/m <sup>2</sup> ] + Cyclophosphamide [600mg/m <sup>2</sup> ]) q21d × 4 preoperative then (Lumpectomy + RT) or Mastectomy) + Tamoxifen [20mg/d] × 5yr                                                                                                                                                                                                                  | 2411 | Yes      | ✓ 2003[25] |
| 4748-50<br>1995K                                                                                 | NSABP B-28, USA                       | (Doxorubicin [60mg/m <sup>2</sup> ] + Cyclophosphamide [600mg/m <sup>2</sup> ]) q21d × 4 then Paclitaxel [225mg/m <sup>2</sup> ] q21d × 4 then Tamoxifen [20mg/d] × 5yr vs (Doxorubicin [60mg/m <sup>2</sup> ] + Cyclophosphamide [600mg/m <sup>2</sup> ]) q21d × 4 then Tamoxifen [20mg/d] × 5yr<br>Or<br>(Doxorubicin [60mg/m <sup>2</sup> ] + Cyclophosphamide [600mg/m <sup>2</sup> ]) q21d × 4 then Paclitaxel [225mg/m <sup>2</sup> ] q21d × 4 vs (Doxorubicin [60mg/m <sup>2</sup> ] + Cyclophosphamide [600mg/m <sup>2</sup> ]) q21d × 4<br>Or<br>(Doxorubicin [60mg/m <sup>2</sup> ] + Cyclophosphamide [600mg/m <sup>2</sup> ]) q21d × 4 then Paclitaxel [225mg/m <sup>2</sup> ] q21d × 4 then Tamoxifen [20mg/d] × 5yr vs (Doxorubicin [60mg/m <sup>2</sup> ] + Cyclophosphamide [600mg/m <sup>2</sup> ]) q21d × 4 then Tamoxifen [20mg/d] × 5yr | 3060 | Yes      | ✓ 2005[26] |

|                                                                                                                                   |                                    |                                                                                                                                                                                                                                                                                                                                                                                                                                                                                                                                                                                                                                                                                                                                                                                                                                |      |     |                     |
|-----------------------------------------------------------------------------------------------------------------------------------|------------------------------------|--------------------------------------------------------------------------------------------------------------------------------------------------------------------------------------------------------------------------------------------------------------------------------------------------------------------------------------------------------------------------------------------------------------------------------------------------------------------------------------------------------------------------------------------------------------------------------------------------------------------------------------------------------------------------------------------------------------------------------------------------------------------------------------------------------------------------------|------|-----|---------------------|
| 4312<br>1998B                                                                                                                     | Taxit216, Italy                    | Epirubicin[120mg/m <sup>2</sup> iv d1] q21d x 4 then Docetaxel [100mg/m <sup>2</sup> iv d1] q21d x 4 then (Cyclophosphamide [600mg/m <sup>2</sup> iv d1,8] + Methotrexate [40mg/m <sup>2</sup> ivd1,8] + 5-Fluoro-Uracil [600mg/m <sup>2</sup> iv d1,8]) q28d x 4 vs Epirubicin[120mg/m <sup>2</sup> iv d1] q21d x 4 then (Cyclophosphamide [600mg/m <sup>2</sup> iv d1,8] + Methotrexate [40mg/m <sup>2</sup> ivd1,8] + 5-Fluoro-Uracil [600mg/m <sup>2</sup> iv d1,8]) q28d x 4                                                                                                                                                                                                                                                                                                                                              | 972  | Yes | ✓ Abstract 2008[27] |
| 34301<br>1999T                                                                                                                    | GOIM 9902, Italy                   | Docetaxel [100mg/m <sup>2</sup> iv d1] q21d x 4 then (Epirubicin[120mg/m <sup>2</sup> iv d1] + Cyclophosphamide [600mg/m <sup>2</sup> iv d1]) q21d x 4 vs (Epirubicin[120mg/m <sup>2</sup> iv d1] + Cyclophosphamide [600mg/m <sup>2</sup> iv d1]) q21d x 4                                                                                                                                                                                                                                                                                                                                                                                                                                                                                                                                                                    | 750  | Yes | ✓ 2012[28]          |
| 30403<br>2001Z                                                                                                                    | Pegase 07, France                  | Epirubicin [150 mg/m <sup>2</sup> d1] + (Cyclophosphamide [4000 mg/m <sup>2</sup> d1] + Mesna + filgrastim [10mcg/kg d5 until last cytapheresis (c1) then 5mcg/kg d3 until neutrophils >500/mm <sup>3</sup> (c2-4)]) q3wk x 4 preoperative then Mastectomy + Axillary Lymph Node Dissection then Radiotherapy + (Docetaxel [75mg/m <sup>2</sup> d1] + 5-Fluoro-Uracil [750 mg/m <sup>2</sup> /day iv d1-d5]) q3wk x 4 +/- Tamoxifen [20 mg/d] x 5yr postoperative vs (Epirubicin [150 mg/m <sup>2</sup> d1] + Cyclophosphamide [4000 mg/m <sup>2</sup> d1] + Mesna + filgrastim [10mcg/kg d5 until last cytapheresis (c1) then 5mcg/kg d3 until neutrophils >500/mm <sup>3</sup> (c2-4)]) q3wk x 4 preoperative then Mastectomy + Axillary Lymph Node Dissection then Radiotherapy +/- Tamoxifen [20 mg/d] x 5yr postoperative | 174  | No  | ✓ 2015[29]          |
| 44802<br>2004!                                                                                                                    | Craiova Dolj Taxane trial, Romania | (Doxorubicin [60 mg/m <sup>2</sup> ] + Cyclophosphamide [600 mg/m <sup>2</sup> ] + Paclitaxel [200 mg/m <sup>2</sup> ]) q21d x 2-4 cycles preoperative vs (Doxorubicin [60 mg/m <sup>2</sup> ] + Cyclophosphamide [600 mg/m <sup>2</sup> ]) q21d x 2-4 cycles preoperative                                                                                                                                                                                                                                                                                                                                                                                                                                                                                                                                                     | 124  | No  | ✓ Abstract 2009[30] |
| <b>(b) Taxane plus anthracycline based regimen (taxane course given alone) vs MORE (but &lt; doubled) non-taxane chemotherapy</b> |                                    |                                                                                                                                                                                                                                                                                                                                                                                                                                                                                                                                                                                                                                                                                                                                                                                                                                |      |     |                     |
| 38401-02<br>1995T                                                                                                                 | HORG Docetaxel trial, Greece       | Docetaxel [100mg/m <sup>2</sup> iv] q3wk x 4 then (Epirubicin[75mg/m <sup>2</sup> iv] + Cyclophosphamide [700mg/m <sup>2</sup> iv]) q3wk x 4 vs (5-Fluoro-Uracil [700mg/m <sup>2</sup> iv] + Epirubicin[75mg/m <sup>2</sup> iv] + Cyclophosphamide [700mg/m <sup>2</sup> iv]) q3wk x 6<br>Or<br>Docetaxel [100mg/m <sup>2</sup> iv] q3wk x 4 then (Epirubicin[75mg/m <sup>2</sup> iv] + Cyclophosphamide [700mg/m <sup>2</sup> iv]) q3wk x 4 + Tamoxifen [20mg/d po] x 5yr vs (5-Fluoro-Uracil [700mg/m <sup>2</sup> iv] + Epirubicin[75mg/m <sup>2</sup> iv] + Cyclophosphamide [700mg/m <sup>2</sup> iv]) q3wk x 6 + Tamoxifen [20mg/d po] x 5yr                                                                                                                                                                             | 788  | Yes | ✓ 2010[31]          |
| 24604<br>1997R                                                                                                                    | HE1097, Greece                     | (Epirubicin[110mg/m <sup>2</sup> ] + filgrastim [5µg/kg d3-10]) q14d x 3 then (Paclitaxel [250mg/m <sup>2</sup> over 3h] + filgrastim [5µg/kg d3-10]) q14d x 3 then (Cyclophosphamide [840mg/m <sup>2</sup> ] + Methotrexate [50mg/m <sup>2</sup> ] + 5-Fluoro-Uracil [840mg/m <sup>2</sup> ] + filgrastim [5µg/kg d3-10]) q14d x 3 vs (Epirubicin[110mg/m <sup>2</sup> ] + filgrastim [5µg/kg d3-10]) q14d x 4 then (Cyclophosphamide [840mg/m <sup>2</sup> ] + Methotrexate [50mg/m <sup>2</sup> ] + 5-Fluoro-Uracil [840mg/m <sup>2</sup> ] + filgrastim [5µg/kg d3-10]) q14d x 4                                                                                                                                                                                                                                           | 604  | Yes | ✓ 2005[32]          |
| 28507<br>1997V                                                                                                                    | IBIS 02, Italy                     | Paclitaxel [175mg/m <sup>2</sup> iv d1] q3wk x 4 then (Epirubicin[75mg/m <sup>2</sup> iv d1] + Vinorelbine [25mg/m <sup>2</sup> iv d1,8]) q3wk x 4 vs Epirubicin[100mg/m <sup>2</sup> iv d1] q3wk x 4 then (Cyclophosphamide [600mg/m <sup>2</sup> iv d1,8] + Methotrexate [40mg/m <sup>2</sup> iv d1,8] + 5-Fluoro-Uracil [600mg/m <sup>2</sup> d1,8]) q4wk x 4                                                                                                                                                                                                                                                                                                                                                                                                                                                               | 244  | Yes | ✓ 2010[33]          |
| 35403-04<br>1998D                                                                                                                 | BIG 02-98, Belgium                 | Doxorubicin [75mg/m <sup>2</sup> iv] q3wk x 3 then Docetaxel [100mg/m <sup>2</sup> iv] q3wk x 3 then (Cyclophosphamide [100mg/m <sup>2</sup> po d1-14] + Methotrexate [40mg/m <sup>2</sup> d1,8] + 5-Fluoro-Uracil [600mg/m <sup>2</sup> iv d1,8]) q28d x 3 vs Doxorubicin [75mg/m <sup>2</sup> iv]                                                                                                                                                                                                                                                                                                                                                                                                                                                                                                                            | 1927 | Yes | ✓ 2013[34]          |

|                   |                            |                                                                                                                                                                                                                                                                                                                                                                                                                                                                                                                                                                                                                                                                                                                                                                                                    |      |     |            |
|-------------------|----------------------------|----------------------------------------------------------------------------------------------------------------------------------------------------------------------------------------------------------------------------------------------------------------------------------------------------------------------------------------------------------------------------------------------------------------------------------------------------------------------------------------------------------------------------------------------------------------------------------------------------------------------------------------------------------------------------------------------------------------------------------------------------------------------------------------------------|------|-----|------------|
| 29607<br>1999K    | GEICAM 9906, Spain         | q3wk x 4 then (Cyclophosphamide [100mg/m <sup>2</sup> po d1-14] + Methotrexate [40mg/m <sup>2</sup> d1,8] + 5-Fluoro-Uracil [600mg/m <sup>2</sup> iv d1,8]) q28d x 3 or (Doxorubicin [60mg/m <sup>2</sup> iv] + Cyclophosphamide [600mg/m <sup>2</sup> iv]) q3wk x 4 then (Cyclophosphamide [100mg/m <sup>2</sup> po d1-14] + Methotrexate [40mg/m <sup>2</sup> d1,8] + 5-Fluoro-Uracil [600mg/m <sup>2</sup> iv d1,8]) q28d x 3<br>(5-Fluoro-Uracil [600mg/m <sup>2</sup> d1] + Epirubicin[90mg/m <sup>2</sup> d1] + Cyclophosphamide [600mg/m <sup>2</sup> d1]) q3wk x 4 then Paclitaxel [100mg/m <sup>2</sup> ] qwk x 8 vs (5-Fluoro-Uracil [600mg/m <sup>2</sup> d1] + Epirubicin[90mg/m <sup>2</sup> d1] + Cyclophosphamide [600mg/m <sup>2</sup> d1]) q3wk x 6                               | 1246 | Yes | ✓ 2008[35] |
| 28902-03<br>2000E | FinHer/FBCG 00-01, Finland | Docetaxel [80/100mg/m <sup>2</sup> d1] q21d x 3 then (5-Fluorouracil [600mg/m <sup>2</sup> d1] + Epirubicin[60mg/m <sup>2</sup> d1] + Cyclophosphamide [600mg/m <sup>2</sup> d1]) q21d x 3 vs Vinorelbine [25mg/m <sup>2</sup> d1, 8, 15] q21d x 3 then (5-Fluorouracil [600mg/m <sup>2</sup> d1] + Epirubicin[60mg/m <sup>2</sup> d1] + Cyclophosphamide [600mg/m <sup>2</sup> d1]) q21d x 3<br>Or<br>Docetaxel [80/100mg/m <sup>2</sup> d1] q21d x 3 then (5-Fluorouracil [600mg/m <sup>2</sup> d1] + Epirubicin[60mg/m <sup>2</sup> d1] + Cyclophosphamide [600mg/m <sup>2</sup> d1]) q21d x 3 vs Vinorelbine [25mg/m <sup>2</sup> d1,8,15] q21d x 3 then (5-Fluorouracil [600mg/m <sup>2</sup> d1] + Epirubicin[60mg/m <sup>2</sup> d1] + Cyclophosphamide [600mg/m <sup>2</sup> d1]) q21d x 3 | 1009 | Yes | ✓ 2009[36] |
| 26109/13<br>2000F | MA.21, Canada              | Radiotherapy then (Epirubicin[120mg/m <sup>2</sup> iv d1] + Cyclophosphamide [830mg/m <sup>2</sup> iv d1] + filgrastim [5µg/kg/d sc d2-13]) q14d x 6 + Erythropoietin [150µg/kg sc q3d/wk] then Paclitaxel [175mg/m <sup>2</sup> iv q3wk] x 4 (after 3wk delay) vs Radiotherapy then (5-Fluoro-Uracil [500mg/m <sup>2</sup> iv d1,8] + Epirubicin[60mg/m <sup>2</sup> iv d1,8] + Cyclophosphamide [75mg/m <sup>2</sup> po d1-14]) q28d x 6 + (Co-trimoxazole [480mg po bd] / Ciprofloxacin [500mg po bd])                                                                                                                                                                                                                                                                                          | 1402 | Yes | ✓ 2010[37] |
| 30903<br>2000S    | WSG/AGO AM-02, Germany     | (Epirubicin[90mg/m <sup>2</sup> ] + Cyclophosphamide [600mg/m <sup>2</sup> ]) q3wk x 4 then Docetaxel [100mg/m <sup>2</sup> ] q3wk x 4 vs (Cyclophosphamide [500mg/m <sup>2</sup> ] + Epirubicin[100mg/m <sup>2</sup> ] + 5-Fluoro-Uracil [500mg/m <sup>2</sup> ]) q3wk x 6                                                                                                                                                                                                                                                                                                                                                                                                                                                                                                                        | 1606 | Yes | ✓ 2014[38] |
| 36601<br>2000U    | AERO B-2000, France        | (5-Fluoro-Uracil [500mg/m <sup>2</sup> ] + Epirubicin[100mg/m <sup>2</sup> ] + Cyclophosphamide [500mg/m <sup>2</sup> ]) q3wk x 4 then Paclitaxel [175mg/m <sup>2</sup> ] q3wk x 4 vs (5-Fluoro-Uracil [500mg/m <sup>2</sup> ] + Epirubicin[100mg/m <sup>2</sup> ] + Cyclophosphamide [500mg/m <sup>2</sup> ]) q3wk x 6                                                                                                                                                                                                                                                                                                                                                                                                                                                                            | 837  | Yes | ✓ 2014[39] |
| 1140<br>2003\$    | GEICAM 2004-04             | Paclitaxel [80mg/m <sup>2</sup> iv] qwk x 12 then ((5-Fluoro-Uracil [500mg/m <sup>2</sup> iv d1] + Doxorubicin [50mg/m <sup>2</sup> iv d1] + Cyclophosphamide [500mg/m <sup>2</sup> iv d1]) q3wk x 4 / (5-Fluoro-Uracil [500mg/m <sup>2</sup> iv d1] + Epirubicin[100mg/m <sup>2</sup> iv d1] + Cyclophosphamide [500mg/m <sup>2</sup> iv d1]) q3wk x 4) preoperative vs ((5-Fluoro-Uracil [500mg/m <sup>2</sup> iv d1] + Doxorubicin [50mg/m <sup>2</sup> iv d1] + Cyclophosphamide [500mg/m <sup>2</sup> iv d1]) q3wk x 6 / (5-Fluoro-Uracil [500mg/m <sup>2</sup> iv d1] + Epirubicin[100mg/m <sup>2</sup> iv d1] + Cyclophosphamide [500mg/m <sup>2</sup> iv d1]) q3wk x 6) preoperative                                                                                                       | 273  | Yes | ✓ 2010[40] |
| 37804<br>2003R    | GIM 1, Italy               | (Epirubicin[90mg/m <sup>2</sup> ] + Cyclophosphamide [600mg/m <sup>2</sup> ]) q21d x 4 then Docetaxel [100mg/m <sup>2</sup> ] q21d x 4 vs (5-Fluoro-Uracil [600mg/m <sup>2</sup> ] + Epirubicin[75mg/m <sup>2</sup> ] + Cyclophosphamide [600mg/m <sup>2</sup> ]) q21d x 6                                                                                                                                                                                                                                                                                                                                                                                                                                                                                                                         | 1636 | No  | No         |
| 29610-12<br>2003U | GEICAM 2003-02, Spain      | (5-Fluoro-Uracil [500mg/m <sup>2</sup> ] + Doxorubicin [50mg/m <sup>2</sup> ] + Cyclophosphamide [500mg/m <sup>2</sup> ]) q3wk x 4 then Paclitaxel [100mg/m <sup>2</sup> ] qwk x 8 vs (5-Fluoro-Uracil                                                                                                                                                                                                                                                                                                                                                                                                                                                                                                                                                                                             | 1925 | Yes | ✓ 2013[41] |

[500mg/m<sup>2</sup>] + Doxorubicin [50mg/m<sup>2</sup>] + Cyclophosphamide [500mg/m<sup>2</sup>] q3wk  
× 6

**(c) Taxane plus anthracycline (taxane given concurrently) vs MORE (but < doubled) non-taxane chemotherapy**

|                   |                                                                |                                                                                                                                                                                                                                                                                                                                                                                                                                                                                                                                                                                                                                                                                                                                                                                                                                                                                          |      |           |                        |
|-------------------|----------------------------------------------------------------|------------------------------------------------------------------------------------------------------------------------------------------------------------------------------------------------------------------------------------------------------------------------------------------------------------------------------------------------------------------------------------------------------------------------------------------------------------------------------------------------------------------------------------------------------------------------------------------------------------------------------------------------------------------------------------------------------------------------------------------------------------------------------------------------------------------------------------------------------------------------------------------|------|-----------|------------------------|
| 33801<br>1995E    | LMU Munich, Germany                                            | (Docetaxel [75mg/m <sup>2</sup> ] + Epirubicin[60mg/m <sup>2</sup> ]) q21d × 6 vs<br>(Epirubicin[90mg/m <sup>2</sup> ] + Cyclophosphamide [600mg/m <sup>2</sup> ]) q21d × 4 then<br>(Cyclophosphamide [600mg/m <sup>2</sup> ] + Methotrexate [40mg/m <sup>2</sup> ] + 5-Fluoro-Uracil<br>[600mg/m <sup>2</sup> ]) q21d × 3                                                                                                                                                                                                                                                                                                                                                                                                                                                                                                                                                               | 36   | No        | ✓ 2000[42]             |
| 31101-02<br>1996# | Helena-Venizelou<br>Chemotherapy Trial, Greece                 | (Epirubicin[75mg/m <sup>2</sup> iv d1] + Paclitaxel [200mg/m <sup>2</sup> over 3h d1]) q21d × 3<br>preoperative then (Epirubicin[75mg/m <sup>2</sup> iv d1] + Paclitaxel [200mg/m <sup>2</sup> over 3h<br>d1]) q21d × 3 postoperative + Radiotherapy [to chest wall] then Tamoxifen ×<br>5yr vs (5-Fluoro-Uracil [600mg/m <sup>2</sup> d1] + Epirubicin[75mg/m <sup>2</sup> d1] +<br>Cyclophosphamide [600mg/m <sup>2</sup> d1]) q21d × 3 preoperative then (5-Fluoro-<br>Uracil [600mg/m <sup>2</sup> d1] + Epirubicin[75mg/m <sup>2</sup> d1] + Cyclophosphamide<br>[600mg/m <sup>2</sup> d1]) q21d × 3 postoperative + Radiotherapy [to chest wall] then<br>Tamoxifen × 5yr                                                                                                                                                                                                           | 70   | No        | ✓ Abstract<br>1998[43] |
| 30801<br>1996%    | Multicentre Germany<br>Chemotherapy Trial                      | (Epirubicin[90mg/m <sup>2</sup> iv d1] + Paclitaxel [175mg/m <sup>2</sup> iv d1]) q14d × 4 + filgrastim<br>[5mcg/kg sc d5-13] then (Cyclophosphamide [600mg/m <sup>2</sup> iv d1] + Methotrexate<br>[40mg/m <sup>2</sup> iv d1] + 5-Fluoro-Uracil [600mg/m <sup>2</sup> iv d1]) q14d × 3 vs<br>(Epirubicin[90mg/m <sup>2</sup> iv d1] + Cyclophosphamide [600mg/m <sup>2</sup> iv d1]) q21d × 4<br>then (Cyclophosphamide [600mg/m <sup>2</sup> iv d1] + Methotrexate [40mg/m <sup>2</sup> iv d1] +<br>5-Fluoro-Uracil [600mg/m <sup>2</sup> iv d1]) q21d × 3                                                                                                                                                                                                                                                                                                                            | 228  | Yes       | ✓ 2006[44]             |
| 3521<br>1996Q     | European Cooperative Trial in<br>Operable Breast Cancer (ECTO) | (Epirubicin[60mg/m <sup>2</sup> iv] then Paclitaxel [200mg/m <sup>2</sup> iv over 3h]) q3wk × 4 then<br>(Cyclophosphamide [600mg/m <sup>2</sup> iv d1,8] + Methotrexate[40mg/m <sup>2</sup> iv d1,8] + 5-<br>Fluoro-Uracil [600mg/m <sup>2</sup> iv d1,8]) q4wk × 4 then Tamoxifen [20mg/d] × 5yr or<br>(Epirubicin[60mg/m <sup>2</sup> iv] then Paclitaxel [200mg/m <sup>2</sup> iv over 3h]) q3wk × 4<br>preoperative then (Cyclophosphamide [600mg/m <sup>2</sup> iv d1,8] + Methotrexate<br>[40mg/m <sup>2</sup> iv d1,8] + 5-Fluoro-Uracil [600mg/m <sup>2</sup> iv d1,8]) q4wk × 4 preoperative<br>then Tamoxifen [20mg/d] × 5yr vs Epirubicin[75mg/m <sup>2</sup> iv] q3wk × 4 then<br>(Cyclophosphamide [600mg/m <sup>2</sup> iv d1,8] + Methotrexate [40mg/m <sup>2</sup> iv d1,8] + 5-<br>Fluoro-Uracil [600mg/m <sup>2</sup> iv d1,8]) q4wk × 4 then Tamoxifen [20mg/d] × 5yr | 1355 | Yes       | ✓ 2009[45]             |
| 31401<br>1996X    | GONO-MIG 5, Italy                                              | (Epirubicin[90mg/m <sup>2</sup> iv d1] + Paclitaxel [175mg/m <sup>2</sup> iv over 3h d1]) q3wk × 4 vs<br>(5-Fluoro-Uracil [600mg/m <sup>2</sup> iv d1] + Epirubicin[60mg/m <sup>2</sup> iv d1] +<br>Cyclophosphamide [600mg/m <sup>2</sup> iv d1]) q3wk × 6                                                                                                                                                                                                                                                                                                                                                                                                                                                                                                                                                                                                                              | 1055 | Yes       | ✓ 2016[46]             |
| 33102<br>1997H1   | Multicentre France Neoadjuvant<br>Chemotherapy Trial           | (Doxorubicin [60mg/m <sup>2</sup> iv] + Paclitaxel [200mg/m <sup>2</sup> iv]) q3wk × 4 preoperative<br>vs (Doxorubicin [60mg/m <sup>2</sup> iv] + Cyclophosphamide [600mg/m <sup>2</sup> iv]) q3wk × 4<br>preoperative                                                                                                                                                                                                                                                                                                                                                                                                                                                                                                                                                                                                                                                                   | 200  | Synthetic | ✓ 2004[47]             |
| 33501<br>1997L    | BCIRG 001 / GEICAM 9703                                        | (Doxorubicin [50mg/m <sup>2</sup> iv d1] + Cyclophosphamide [500mg/m <sup>2</sup> iv d1] +<br>Docetaxel [75mg/m <sup>2</sup> iv d1]) q21d × 6 vs (Doxorubicin [50mg/m <sup>2</sup> iv d1] + 5-<br>Fluoro-Uracil [500mg/m <sup>2</sup> iv d1] + Cyclophosphamide [500mg/m <sup>2</sup> iv d1]) q21d ×<br>6                                                                                                                                                                                                                                                                                                                                                                                                                                                                                                                                                                                | 1491 | Yes       | ✓ 2013[48]             |
| 35403-04<br>1998D | BIG 02-98, Belgium                                             | (Doxorubicin [50mg/m <sup>2</sup> iv] + Docetaxel [75mg/m <sup>2</sup> iv]) q3wk × 4 then<br>(Cyclophosphamide [100mg/m <sup>2</sup> po d1-14] + Methotrexate [40mg/m <sup>2</sup> d1,8] + 5-<br>Fluoro-Uracil [600mg/m <sup>2</sup> iv d1,8]) q28d × 3 vs Doxorubicin [75mg/m <sup>2</sup> iv] q3wk                                                                                                                                                                                                                                                                                                                                                                                                                                                                                                                                                                                     | 1928 | Yes       | ✓ 2013[34]             |

|                                                                                   |                                                         |                                                                                                                                                                                                                                                                                                                                                                                                                                                                                                                                                                                                                 |      |           |                     |
|-----------------------------------------------------------------------------------|---------------------------------------------------------|-----------------------------------------------------------------------------------------------------------------------------------------------------------------------------------------------------------------------------------------------------------------------------------------------------------------------------------------------------------------------------------------------------------------------------------------------------------------------------------------------------------------------------------------------------------------------------------------------------------------|------|-----------|---------------------|
| 7520<br>1998T                                                                     | ECOG EST2197, USA                                       | × 4 then (Cyclophosphamide [100mg/m <sup>2</sup> po d1-14] + Methotrexate [40mg/m <sup>2</sup> d1,8] + 5-Fluoro-Uracil [600mg/m <sup>2</sup> iv d1,8]) q28d × 3 or (Doxorubicin [60mg/m <sup>2</sup> iv] + Cyclophosphamide [600mg/m <sup>2</sup> iv]) q3wk × 4 then (Cyclophosphamide [100mg/m <sup>2</sup> po d1-14] + Methotrexate [40mg/m <sup>2</sup> d1,8] + 5-Fluoro-Uracil [600mg/m <sup>2</sup> iv d1,8]) q28d × 3                                                                                                                                                                                     | 2952 | Yes       | ✓ 2008[49]          |
| 29603-06<br>1999%                                                                 | GEICAM 9805 / TARGET 0, Spain                           | (Doxorubicin [60mg/m <sup>2</sup> ] + Docetaxel [60mg/m <sup>2</sup> ]) q3wk × 4 vs (Doxorubicin [60mg/m <sup>2</sup> ] + Cyclophosphamide [600mg/m <sup>2</sup> ]) q3wk × 4                                                                                                                                                                                                                                                                                                                                                                                                                                    | 1060 | Yes       | ✓ 2010[50]          |
| 27402<br>1999A                                                                    | Anglo-Celtic II (Primary Medical Therapy Trial IIA), UK | (Docetaxel [75mg/m <sup>2</sup> d1] + Doxorubicin [50mg/m <sup>2</sup> d1] + Cyclophosphamide [500mg/m <sup>2</sup> d1]) q3wk × 6 vs (5-Fluoro-Uracil [500mg/m <sup>2</sup> d1] + Doxorubicin [50mg/m <sup>2</sup> d1] + Cyclophosphamide [500mg/m <sup>2</sup> d1]) q3wk × 6                                                                                                                                                                                                                                                                                                                                   | 363  | Yes       | ✓ 2010[51]          |
| 20603<br>1999N                                                                    | RAPP-01, France                                         | (Doxorubicin [50mg/m <sup>2</sup> ] + Docetaxel [75mg/m <sup>2</sup> ]) q3wk × 6 primary preoperative vs (Doxorubicin [60mg/m <sup>2</sup> ] + Cyclophosphamide [600mg/m <sup>2</sup> ]) q3wk × 6 primary preoperative                                                                                                                                                                                                                                                                                                                                                                                          | 627  | Yes       | ✓ 2005[52]          |
| 33202/04<br>2001E1+3                                                              | PACS 04, France                                         | (Doxorubicin [50mg/m <sup>2</sup> ] + Docetaxel [75mg/m <sup>2</sup> ]) q3wk × 4 postoperative vs (Doxorubicin [60mg/m <sup>2</sup> ] + Cyclophosphamide [600mg/m <sup>2</sup> ]) q3wk × 4 postoperative                                                                                                                                                                                                                                                                                                                                                                                                        | 3009 | Yes       | ✓ 2009[53]          |
| 8727<br>2002L                                                                     | St Petersburg Neoadjuvant trial, Russia                 | (Epirubicin[75mg/m <sup>2</sup> iv d1] + Docetaxel [75mg/m <sup>2</sup> iv d1]) q3wk × 6 + Radiotherapy vs (5-Fluoro-Uracil [500mg/m <sup>2</sup> iv d1] + Epirubicin[100mg/m <sup>2</sup> iv d1] + Cyclophosphamide [500mg/m <sup>2</sup> iv d1]) q3wk × 6 + Radiotherapy                                                                                                                                                                                                                                                                                                                                      | 103  | No        | ✓ Abstract 2002[54] |
| 38913-14<br>2004N                                                                 | MATADOR / BOOG 2005-02 / CKTO 2004-04                   | (Paclitaxel [200 mg/m <sup>2</sup> ] + Doxorubicin [60 mg/m <sup>2</sup> ]) q3wk × 4 preoperative vs (5-Fluorouracil [600 mg/m <sup>2</sup> ] + Doxorubicin [60 mg/m <sup>2</sup> ] + Cyclophosphamide [600 mg/m <sup>2</sup> ]) q3wk × 4 preoperative                                                                                                                                                                                                                                                                                                                                                          | 664  | Yes       | ✓ 2018[55]          |
| 40302<br>2007"                                                                    | Kolkata Chemotherapy trial, India                       | (Docetaxel [75mg/m <sup>2</sup> iv d1] + Doxorubicin [50mg/m <sup>2</sup> iv d1] + Cyclophosphamide [500mg/m <sup>2</sup> iv d1] + Pegfilgrastim [6mg sc 1d after chemo]) q3wk × 6 vs (Doxorubicin [60mg/m <sup>2</sup> iv d1] + Cyclophosphamide [600mg/m <sup>2</sup> iv d1] + Pegfilgrastim [6mg sc 1d after chemo]) q2wk × 6                                                                                                                                                                                                                                                                                | 50   | No        | ✓ 2012[56]          |
| <b>(d) Taxane plus anthracycline vs DOUBLED non-taxane cytotoxic chemotherapy</b> |                                                         |                                                                                                                                                                                                                                                                                                                                                                                                                                                                                                                                                                                                                 |      |           |                     |
| 1122-24, 27-<br>29<br>1994B                                                       | Protocol 94-002 MDA                                     | Doxorubicin [60 mg/m <sup>2</sup> ] + Cyclophosphamide [600 mg/m <sup>2</sup> ] q3wk × 6 then Paclitaxel [175 mg/m <sup>2</sup> ] q3wk × 3 vs Doxorubicin [60 mg/m <sup>2</sup> ] + Cyclophosphamide [600 mg/m <sup>2</sup> ] q3wk × 6                                                                                                                                                                                                                                                                                                                                                                          | 474  | Yes       | ✓ 2011[57]          |
| 34001<br>1996F                                                                    | Aberdeen Trial, Scotland                                | Paclitaxel [250mg/m <sup>2</sup> 24h infusion] q3wk × 4 then (5-Fluoro-Uracil [500mg/m <sup>2</sup> iv d1,4] + Doxorubicin [50mg/m <sup>2</sup> 72h infusion] + Cyclophosphamide [500mg/m <sup>2</sup> iv d1]) q3wk × 4 then Radiotherapy vs (5-Fluoro-Uracil [500mg/m <sup>2</sup> iv d1,4] + Doxorubicin [50mg/m <sup>2</sup> 72h infusion] + Cyclophosphamide [500mg/m <sup>2</sup> iv d1]) q3wk × 8 then Radiotherapy                                                                                                                                                                                       | 104  | Synthetic | ✓ Abstract 2003[58] |
|                                                                                   |                                                         | (Cyclophosphamide [1000mg/m <sup>2</sup> ] + Doxorubicin [50mg/m <sup>2</sup> ] + Vincristine [1.5mg/m <sup>2</sup> ] + Prednisolone [40mg]) q21d × 4 preoperative then (Prednisolone [100mg po] + Docetaxel [100mg/m <sup>2</sup> ]) q21d × 4 postoperative vs (Cyclophosphamide [1000mg/m <sup>2</sup> ] + Doxorubicin [50mg/m <sup>2</sup> ] + Vincristine [1.5mg/m <sup>2</sup> ] + Prednisolone [40mg]) q21d × 4 preoperative then (Cyclophosphamide [1000mg/m <sup>2</sup> ] + Doxorubicin [50mg/m <sup>2</sup> ] + Vincristine [1.5mg/m <sup>2</sup> ] + Prednisolone [100mg po]) q21d × 4 postoperative |      |           |                     |

|                      |                                                     |                                                                                                                                                                                                                                                                                                                                                                                                                                                                                                                        |      |     |                        |
|----------------------|-----------------------------------------------------|------------------------------------------------------------------------------------------------------------------------------------------------------------------------------------------------------------------------------------------------------------------------------------------------------------------------------------------------------------------------------------------------------------------------------------------------------------------------------------------------------------------------|------|-----|------------------------|
| 20008-09<br>1997A    | DEVA, UK                                            | (Epirubicin[50mg/m <sup>2</sup> d1,8] q4wk × 3 then Docetaxel [100mg/m <sup>2</sup> d1] q3wk × 3) + Tamoxifen [20 mg/d] × 5yr concurrent vs Epirubicin[50mg/m <sup>2</sup> d1,8] q4wk × 6 + Tamoxifen [20 mg/d] × 5yr concurrent                                                                                                                                                                                                                                                                                       | 803  | Yes | ✓ 2011[59]             |
| 33201<br>1997J       | PACS 01, France                                     | (5-Fluoro-Uracil [500mg/m <sup>2</sup> d1] + Epirubicin[100mg/m <sup>2</sup> d1] + Cyclophosphamide [500mg/m <sup>2</sup> d1]) q21d × 3 then Docetaxel [100mg/m <sup>2</sup> d1] q21d × 3 vs (5-Fluoro-Uracil [500mg/m <sup>2</sup> d1] + Epirubicin[100mg/m <sup>2</sup> d1] + Cyclophosphamide [500mg/m <sup>2</sup> d1]) q21d × 6                                                                                                                                                                                   | 1999 | Yes | ✓ 2012[60]             |
| 26109/13<br>2000F    | MA.21, Canada                                       | Radiotherapy then (Doxorubicin [60mg/m <sup>2</sup> iv d1] + Cyclophosphamide [600mg/m <sup>2</sup> iv d1]) q21d × 4 then Paclitaxel [175mg/m <sup>2</sup> iv q3wk] × 4 (after 3wk delay) vs Radiotherapy then (5-Fluoro-Uracil [500mg/m <sup>2</sup> iv d1,8] + Epirubicin[60mg/m <sup>2</sup> iv d1,8] + Cyclophosphamide [75mg/m <sup>2</sup> po d1-14]) q28d × 6 + (Co-trimoxazole [480mg po bd] / Ciprofloxacin [500mg po bd])                                                                                    | 1403 | Yes | ✓ 2010[37]             |
| 24016/18<br>2001F    | TACT, UK                                            | (5-Fluoro-Uracil [600mg/m <sup>2</sup> iv] + Epirubicin[60mg/m <sup>2</sup> iv] + Cyclophosphamide [600mg/m <sup>2</sup> iv]) q3wk × 4 then Docetaxel [100mg/m <sup>2</sup> iv d1] q3wk × 4 vs (5-Fluoro-Uracil [600mg/m <sup>2</sup> iv] + Epirubicin[60mg/m <sup>2</sup> iv] + Cyclophosphamide [600mg/m <sup>2</sup> iv]) q3wk × 8                                                                                                                                                                                  | 2523 | Yes | ✓ 2009[61]             |
| 24017/19<br>2001G1+2 | TACT, UK                                            | (5-Fluoro-Uracil [600mg/m <sup>2</sup> iv] + Epirubicin[60mg/m <sup>2</sup> iv] + Cyclophosphamide [600mg/m <sup>2</sup> iv]) q3wk × 4 then Docetaxel [100mg/m <sup>2</sup> iv d1] q3wk × 4 vs Epirubicin[100mg/m <sup>2</sup> iv] q3wk × 4 then (Cyclophosphamide [100mg/m <sup>2</sup> po d1-14 / 600mg/m <sup>2</sup> iv d1,8] + Methotrexate [40mg/m <sup>2</sup> iv d1,8] + 5-Fluoro-Uracil [600mg/m <sup>2</sup> iv d1,8]) q4wk × 4                                                                              | 1639 | Yes | ✓ 2009[61]             |
| 6320-21<br>2001J     | E.O.R.T.C. Trial 10994                              | Docetaxel [100mg/m <sup>2</sup> iv] q3wk × 3 then (Epirubicin[90mg/m <sup>2</sup> iv] + Docetaxel [75mg/m <sup>2</sup> iv]) q3wk × 3 preoperative vs ((5-Fluoro-Uracil [500mg/m <sup>2</sup> iv] + Epirubicin[100mg/m <sup>2</sup> iv] + Cyclophosphamide [500mg/m <sup>2</sup> iv]) q3wk × 6) / ((5-Fluoro-Uracil [iv d1,8] + Epirubicin[iv d1,8] + Cyclophosphamide [po d1-14]) q4wk × 6) / ((5-Fluoro-Uracil [iv d1] + Epirubicin[iv d1] + Cyclophosphamide [iv d1] + Filgrastim [sc d2-15]) q3wk × 6) preoperative | 1856 | Yes | ✓ 2014[62]             |
| 33804<br>2001T       | ADEBAR Study, Germany                               | Radiotherapy + (Epirubicin[90mg/m <sup>2</sup> ] + Cyclophosphamide [600mg/m <sup>2</sup> ]) q21d × 4 then Docetaxel [100mg/m <sup>2</sup> ] q21d × 4 vs Radiotherapy + (Epirubicin[60mg/m <sup>2</sup> d1,8] + 5-Fluoro-Uracil [500mg/m <sup>2</sup> d1,8] + Cyclophosphamide [75mg/m <sup>2</sup> d1-14]) q4wk × 6                                                                                                                                                                                                   | 1363 | Yes | ✓ 2016[63]             |
| 35009-10<br>2002D    | GBG 42, Germany                                     | (5-Fluoro-Uracil [500mg/m <sup>2</sup> ] + Epirubicin[100mg/m <sup>2</sup> ] + Cyclophosphamide [500mg/m <sup>2</sup> ]) q3wk × 3 then Docetaxel [100mg/m <sup>2</sup> ] q3wk × 3 vs (5-Fluoro-Uracil [500mg/m <sup>2</sup> ] + Epirubicin[100mg/m <sup>2</sup> ] + Cyclophosphamide [500mg/m <sup>2</sup> ]) q3wk × 6                                                                                                                                                                                                 | 2660 | Yes | ✓ Abstract[64]<br>2012 |
| 28403-08<br>2002G    | Bari Inflammatory Breast Cancer with Surgery, Italy | (Epirubicin[120mg/m <sup>2</sup> d1] + Vinorelbine [25mg/m <sup>2</sup> d1,8]) × 4 preoperative then Surgery/Radiotherapy then Docetaxel [100mg/m <sup>2</sup> ] q3wk × 4 vs (Epirubicin[120mg/m <sup>2</sup> d1] + Vinorelbine [25mg/m <sup>2</sup> d1,8]) × 4 preoperative then Surgery/Radiotherapy then (Epirubicin[120mg/m <sup>2</sup> d1] + Vinorelbine [25mg/m <sup>2</sup> d1,8]) q3wk × 4                                                                                                                    | 56   | No  | ✓ Abstract<br>2008[65] |



### Cohort 3: Taxane vs Anthracycline

| Trial & year code                      | Trial name                               | Comparisons                                                                                                                                                                                                                                                                                       | N    | Received | Published  |
|----------------------------------------|------------------------------------------|---------------------------------------------------------------------------------------------------------------------------------------------------------------------------------------------------------------------------------------------------------------------------------------------------|------|----------|------------|
| <b>(a) Docetaxel vs anthracycline</b>  |                                          |                                                                                                                                                                                                                                                                                                   |      |          |            |
| 34201&03<br>1997N1&2                   | U.S. Oncology Trial 97-35, USA           | (Docetaxel [75mg/m <sup>2</sup> ] + Cyclophosphamide [600mg/m <sup>2</sup> ]) q3wk x 4 vs (Doxorubicin [60mg/m <sup>2</sup> ] + Cyclophosphamide [600mg/m <sup>2</sup> ]) q3wk x 4                                                                                                                | 1016 | Yes      | ✓ 2005[66] |
| 6328<br>2006Z2                         | MINDACT/ EORTC 10041 / BIG 3-04, Belgium | Docetaxel [75 mg/m <sup>2</sup> iv d1] + Capecitabine [825 mg/m <sup>2</sup> po bd d1-14] q3wk x 6 vs (Fluorouracil [500 mg/m <sup>2</sup> iv] + Epirubicin [100 mg/m <sup>2</sup> iv] + Cyclophosphamide [500 mg/m <sup>2</sup> iv]) d1 q3wk x 6 (or various other anthracycline based regimens) | 909  | Yes      | ✓ 2017[67] |
| 51901<br>2008)                         | Singapore-NCC0705                        | (Cyclophosphamide [iv d1] + Docetaxel [iv d1]) q3wk x 4 preoperative vs (Cyclophosphamide [iv d1] + Doxorubicin [iv d1]) q3wk x 4 preoperative                                                                                                                                                    | 20   | No       | No         |
| 48301<br>2008Y                         | Duke Taxane trial/NCT00636441, USA       | (Docetaxel [75 mg/m <sup>2</sup> ] + Cyclophosphamide [600 mg/m <sup>2</sup> ]) q3wk x 4 preoperative vs (Doxorubicin [60 mg/m <sup>2</sup> ] + Cyclophosphamide [600 mg/m <sup>2</sup> ]) q3wk x 4 preoperative                                                                                  | 56   | No       | ✓ 2010[68] |
| <b>(b) Paclitaxel vs anthracycline</b> |                                          |                                                                                                                                                                                                                                                                                                   |      |          |            |
| 44701&02<br>1997[1&2                   | Epi-Tax trial, Norway                    | Paclitaxel [200 mg/m <sup>2</sup> ] q3wk x 4 preoperative vs Epirubicin [90 mg/m <sup>2</sup> ] q3wk x 4 preoperative                                                                                                                                                                             | 223  | Yes      | ✓ 2011[69] |
| 8322<br>2002B1                         | CALGB 40101, USA                         | (Doxorubicin [60mg/m <sup>2</sup> ] + Cyclophosphamide [600mg/m <sup>2</sup> ]) q3wk x 4 or x 6 vs Paclitaxel [80mg/m <sup>2</sup> ] qwk x 12 or x 18                                                                                                                                             | 570  | Yes      | ✓ 2014[70] |
| 8323<br>2002B2                         | CALGB 40101, USA                         | (Doxorubicin [60mg/m <sup>2</sup> ] + Cyclophosphamide [600mg/m <sup>2</sup> ]) q2wk x 4 or x 6 vs Paclitaxel [175mg/m <sup>2</sup> ] q2wk x 4 or x 6                                                                                                                                             | 2622 | Yes      | ✓ 2014[70] |
| 8324<br>2002B3                         | CALGB 40101, USA                         | (Doxorubicin [60mg/m <sup>2</sup> ] + Cyclophosphamide [600mg/m <sup>2</sup> ]) q2wk x 4 vs Paclitaxel [175mg/m <sup>2</sup> ] q2wk x 4                                                                                                                                                           | 679  | Yes      | ✓ 2014[70] |

### Cohort 4: Head-to-Head Taxanes

| Trial code                                                                   | Trial name                        | Comparisons                                                                                                                                                                                                                                                                                                             | N    | Received | Published  |
|------------------------------------------------------------------------------|-----------------------------------|-------------------------------------------------------------------------------------------------------------------------------------------------------------------------------------------------------------------------------------------------------------------------------------------------------------------------|------|----------|------------|
| <b>(a) Docetaxel 2-weekly or 3-weekly vs paclitaxel 2-weekly or 3-weekly</b> |                                   |                                                                                                                                                                                                                                                                                                                         |      |          |            |
| 7521-22<br>1999V                                                             | E1199/Intergroup Trial, ECOG, USA | (Doxorubicin [60 mg/m <sup>2</sup> iv] + Cyclophosphamide [600 mg/m <sup>2</sup> iv]) q3wk x 4 then Docetaxel [100 mg/m <sup>2</sup> iv over 1h] q3wk x 4 vs (Doxorubicin [60 mg/m <sup>2</sup> iv] + Cyclophosphamide [600 mg/m <sup>2</sup> iv]) q3wk x 4 then Paclitaxel [175 mg/m <sup>2</sup> iv over 3h] q3wk x 4 | 2534 | Yes      | ✓ 2015[71] |

|                                                  |                                   |                                                                                                                                                                                                                                                                                                                                                                                                                                                                                                                                                                                            |      |     |                     |
|--------------------------------------------------|-----------------------------------|--------------------------------------------------------------------------------------------------------------------------------------------------------------------------------------------------------------------------------------------------------------------------------------------------------------------------------------------------------------------------------------------------------------------------------------------------------------------------------------------------------------------------------------------------------------------------------------------|------|-----|---------------------|
| 35901<br>2000W                                   | N-SAS BC 02, Japan                | ((Doxorubicin [60mg/m <sup>2</sup> ] or Epirubicin [75mg/m <sup>2</sup> ]) + Cyclophosphamide [600mg/m <sup>2</sup> ] q3wk x 4 then Docetaxel [75mg/m <sup>2</sup> ] q3wk x 4 then Tam/Als x 5yr if ER+/PR+ vs ((Doxorubicin [60mg/m <sup>2</sup> ] or Epirubicin [75mg/m <sup>2</sup> ]) + Cyclophosphamide [600mg/m <sup>2</sup> ] q3wk x 4 then Paclitaxel [175mg/m <sup>2</sup> ] q3wk x 4 then Tam/Als x 5yr if ER+/PR+<br>Or<br>Docetaxel [75mg/m <sup>2</sup> ] q3wk x 8 then Tam/Als x 5yr if ER+/PR+ vs Paclitaxel [175mg/m <sup>2</sup> ] q3wk x 8 then Tam/Als x 5yr if ER+/PR+ | 1060 | Yes | ✓ 2017[11]          |
| 38404<br>2004R                                   | CT/04.22, HORG, Greece            | (5-fluorouracil [700mg/m <sup>2</sup> iv] d1 + epirubicin [75mg/m <sup>2</sup> iv d1,15] + cyclophosphamide [700mg/m <sup>2</sup> iv d1]) q4w x 4 then (Docetaxel [75mg/m <sup>2</sup> iv] q2w x 4 vs Paclitaxel [175mg/m <sup>2</sup> iv] q2w x 4)                                                                                                                                                                                                                                                                                                                                        | 481  | Yes | ✓ 2014[73]          |
| 42201                                            | Mansoura Taxane trial, Egypt      | (Doxorubicin [60 mg/m <sup>2</sup> ] + Cyclophosphamide [600 mg/m <sup>2</sup> ]) q3wk x 4 then Docetaxel [100 mg/m <sup>2</sup> ] q3wk x 4 vs (Doxorubicin [60 mg/m <sup>2</sup> ] + Cyclophosphamide [600 mg/m <sup>2</sup> ]) q3wk x 4 then Paclitaxel [175 mg/m <sup>2</sup> ] q3wk x 4                                                                                                                                                                                                                                                                                                | 160  | No  | ✓ Abstract 2011[73] |
| <b>(b) Docetaxel weekly vs paclitaxel weekly</b> |                                   |                                                                                                                                                                                                                                                                                                                                                                                                                                                                                                                                                                                            |      |     |                     |
| 7521-22<br>1999V                                 | E1199/Intergroup Trial, ECOG, USA | (Doxorubicin [60 mg/m <sup>2</sup> iv] + Cyclophosphamide [600 mg/m <sup>2</sup> iv]) q3wk x 4 then Docetaxel [35 mg/m <sup>2</sup> iv over 1h] qwk x 12 vs (Doxorubicin [60 mg/m <sup>2</sup> iv] + Cyclophosphamide [600 mg/m <sup>2</sup> iv]) q3wk x 4 then Paclitaxel [80 mg/m <sup>2</sup> iv over 1h] qwk x 12                                                                                                                                                                                                                                                                      | 2518 | Yes | ✓ 2015[71]          |
| 24610<br>2005C                                   | HE 10/05, HECOG, Greece           | Epirubicin [110mg/m <sup>2</sup> ] q2wk x 3 then (Cyclophosphamide [840mg/m <sup>2</sup> ] + Methotrexate [57mg/m <sup>2</sup> ] + 5-Fluorouracil [840mg/m <sup>2</sup> ]) q2wk x 3 then Docetaxel [35mg/m <sup>2</sup> ] qwk x 9 vs Epirubicin [110mg/m <sup>2</sup> ] q2wk x 3 then (Cyclophosphamide [840mg/m <sup>2</sup> ] + Methotrexate [57mg/m <sup>2</sup> ] + 5-Fluorouracil [840mg/m <sup>2</sup> ]) q2wk x 3 then Paclitaxel [80mg/m <sup>2</sup> ] qwk x 9                                                                                                                    | 664  | Yes | ✓ 2014[75]          |
| 38302<br>2007'                                   | KBCOG-06, Japan                   | Docetaxel [75mg/m <sup>2</sup> ] q3wk x 4 then (5-Fluoro-Uracil + Epirubicin + Cyclophosphamide) preoperative vs Paclitaxel [80mg/m <sup>2</sup> d1,8,15] q4wk x 4 then (5-Fluoro-Uracil + Epirubicin + Cyclophosphamide) preoperative                                                                                                                                                                                                                                                                                                                                                     | 50   | No  | No                  |

## Cohort 5: Dose fractionation

| Trial & year code                                        | Trial name      | Comparisons                                                                                                                                                                                                                                                                                                                                                                                                                                                                   | N   | Received | Published  |
|----------------------------------------------------------|-----------------|-------------------------------------------------------------------------------------------------------------------------------------------------------------------------------------------------------------------------------------------------------------------------------------------------------------------------------------------------------------------------------------------------------------------------------------------------------------------------------|-----|----------|------------|
| <b>(a) Chemotherapy in smaller fractions: Paclitaxel</b> |                 |                                                                                                                                                                                                                                                                                                                                                                                                                                                                               |     |          |            |
| 1125-26,<br>1134-37<br>1998K                             | MDA 98-240, USA | Paclitaxel [80mg/m <sup>2</sup> ] qwk x 12 + (5-Fluoro-Uracil [500mg/m <sup>2</sup> d1,4] + Cyclophosphamide [500mg/m <sup>2</sup> d1] + Doxorubicin [50mg/m <sup>2</sup> over 72h]) q3wk x 4 preoperative then Local Therapy vs Paclitaxel [225mg/m <sup>2</sup> over 24h] q3wk x 4 + (5-Fluoro-Uracil [500mg/m <sup>2</sup> d1,4] + Cyclophosphamide [500mg/m <sup>2</sup> d1] + Doxorubicin [50mg/m <sup>2</sup> over 72h]) q3wk x 4 preoperative then Local Therapy<br>Or | 254 | Yes      | ✓ 2005[76] |

|                  |                                     |                                                                                                                                                                                                                                                                                                                                                                                                                                                                                                                                                                                                                                                                                                                                                                                                  |      |     |                   |
|------------------|-------------------------------------|--------------------------------------------------------------------------------------------------------------------------------------------------------------------------------------------------------------------------------------------------------------------------------------------------------------------------------------------------------------------------------------------------------------------------------------------------------------------------------------------------------------------------------------------------------------------------------------------------------------------------------------------------------------------------------------------------------------------------------------------------------------------------------------------------|------|-----|-------------------|
| 7521-22<br>1999V | E1199/Intergroup Trial, ECOG, USA   | Paclitaxel [150/175mg/m <sup>2</sup> ] qwk × 12 + (5-Fluoro-Uracil [500mg/m <sup>2</sup> d1,4] + Cyclophosphamide [500mg/m <sup>2</sup> d1] + Doxorubicin [50mg/m <sup>2</sup> over 72h]) q3wk × 4 preoperative then Local Therapy vs Paclitaxel [225mg/m <sup>2</sup> over 24h] q3wk × 4 + (5-Fluoro-Uracil [500mg/m <sup>2</sup> d1,4] + Cyclophosphamide [500mg/m <sup>2</sup> d1] + Doxorubicin [50mg/m <sup>2</sup> over 72h]) q3wk × 4 preoperative then Local Therapy                                                                                                                                                                                                                                                                                                                     | 2530 | Yes | ✓ 2015[71]        |
| 1215/19<br>2003* | SWOG S0221, USA                     | (Doxorubicin [24mg/m <sup>2</sup> /wk] + Cyclophosphamide [60mg/m <sup>2</sup> /d po] + filgrastim [5mcg/kg/d sc d2-7]) qwk × 15wk then Paclitaxel [80mg/m <sup>2</sup> ] qwk × 12 or (Doxorubicin [60mg/m <sup>2</sup> ] + Cyclophosphamide [600mg/m <sup>2</sup> ] + Pegfilgrastim [6mg sc d2]) q2wk × 6 then Paclitaxel [80mg/m <sup>2</sup> ] qwk × 12 vs (Doxorubicin [24mg/m <sup>2</sup> /wk iv] + Cyclophosphamide [60mg/m <sup>2</sup> /d po] + filgrastim [5mcg/kg/d sc d2-7]) qwk × 15wk then (Paclitaxel [175mg/m <sup>2</sup> ] + Pegfilgrastim [6mg sc d2]) q2wk × 6 or (Doxorubicin [60mg/m <sup>2</sup> d1] + Cyclophosphamide [600mg/m <sup>2</sup> iv d1] + Pegfilgrastim [6mg sc d2]) q2wk × 6 then (Paclitaxel [175mg/m <sup>2</sup> ] + Pegfilgrastim [6mg sc d2]) q2wk × 6 | 3294 | Yes | ✓ 2015[77]        |
| 24610<br>2005C   | HE 10/05, HECOG, Greece             | Epirubicin [110mg/m <sup>2</sup> ] q2wk × 3 then (Cyclophosphamide [840mg/m <sup>2</sup> ] + Methotrexate [57mg/m <sup>2</sup> ] + 5-Fluorouracil [840mg/m <sup>2</sup> ]) q2wk × 3 then Paclitaxel [80mg/m <sup>2</sup> ] qwk × 9 vs Epirubicin [110mg/m <sup>2</sup> ] q2wk × 3 then Paclitaxel [200mg/m <sup>2</sup> ] q2wk × 3 then (Cyclophosphamide [840mg/m <sup>2</sup> ] + Methotrexate [57mg/m <sup>2</sup> ] + 5-Fluorouracil [840mg/m <sup>2</sup> ]) q2wk × 3                                                                                                                                                                                                                                                                                                                       | 667  | Yes | ✓ 2012[75]        |
| 51801<br>2005R   | PKU Paclitaxel trial, Beijing China | (Carboplatin [AUC 6 d1] + Paclitaxel [60 mg/m <sup>2</sup> d1,8,15]) q3wk × 4 preoperative vs (Carboplatin [AUC 6 d1] + Paclitaxel [175 mg/m <sup>2</sup> d1]) q3wk × 4 preoperative                                                                                                                                                                                                                                                                                                                                                                                                                                                                                                                                                                                                             | 220  | No  | Abstract 2010[78] |

**(b) Chemotherapy in smaller fractions: Docetaxel**

|                   |                                      |                                                                                                                                                                                                                                                                                                                                                                        |      |     |            |
|-------------------|--------------------------------------|------------------------------------------------------------------------------------------------------------------------------------------------------------------------------------------------------------------------------------------------------------------------------------------------------------------------------------------------------------------------|------|-----|------------|
| 7521-22<br>1999V  | E1199/Intergroup Trial, ECOG, USA    | (Doxorubicin [60 mg/m <sup>2</sup> iv] + Cyclophosphamide [600 mg/m <sup>2</sup> iv]) q3wk × 4 then Docetaxel [35 mg/m <sup>2</sup> iv over 1h] qwk × 12 vs (Doxorubicin [60 mg/m <sup>2</sup> iv] + Cyclophosphamide [600 mg/m <sup>2</sup> iv]) q3wk × 4 then Docetaxel [100 mg/m <sup>2</sup> iv over 1h] q3wk × 4                                                  | 2886 | Yes | ✓ 2015[71] |
| 45201-02<br>2000^ | Hull Neoadjuvant trial, UK           | (Doxorubicin [60mg/m <sup>2</sup> iv] + Cyclophosphamide [600mg/m <sup>2</sup> iv] q3wk) × 4 then Docetaxel [33mg/m <sup>2</sup> iv] qwk × 12 (with a 2 week break between cycles 6 and 7) preoperative vs (Doxorubicin [60mg/m <sup>2</sup> iv] + Cyclophosphamide [600mg/m <sup>2</sup> iv] q3wk) × 4 then Docetaxel [100mg/m <sup>2</sup> iv] q3wk × 4 preoperative | 82   | Yes | ✓ 2011[79] |
| 38803<br>2004Z    | BREAST-10, Italy                     | Epirubicin [30mg/m <sup>2</sup> d1,8,15] + Docetaxel [35mg/m <sup>2</sup> d1,8,15] q4wk × 3 preoperative vs Epirubicin [75mg/m <sup>2</sup> d1] + Docetaxel [80mg/m <sup>2</sup> d1] q3wk × 4 preoperative                                                                                                                                                             | 44   | Yes | ✓ 2011[80] |
| 46401<br>2005@    | UZLeuven Chemotherapy trial, Belgium | ((5-fluorouracil [375 mg/m <sup>2</sup> ] + Epirubicin [75 mg/m <sup>2</sup> ] + Cyclophosphamide [375 mg/m <sup>2</sup> ]) q10-11d × 4 then Docetaxel [75 mg/m <sup>2</sup> ] q2wk × 4) + pegfilgrastim [6mg sc] d2 of each cycle vs (5-fluorouracil [500 mg/m <sup>2</sup> ] +                                                                                       | 85   | Yes | ✓ 2009[81] |

|                |                                          |                                                                                                                                                                                                                                                                                                                                                                                                                                                                                                                                                                                                                                                                                                                                                                                                                   |    |    |            |
|----------------|------------------------------------------|-------------------------------------------------------------------------------------------------------------------------------------------------------------------------------------------------------------------------------------------------------------------------------------------------------------------------------------------------------------------------------------------------------------------------------------------------------------------------------------------------------------------------------------------------------------------------------------------------------------------------------------------------------------------------------------------------------------------------------------------------------------------------------------------------------------------|----|----|------------|
| 45504<br>2007e | Emory Induction trial / NCT00209092, USA | Epirubicin [100 mg/m <sup>2</sup> ] + Cyclophosphamide [500 mg/m <sup>2</sup> ] q3wk × 3 then Docetaxel [100 mg/m <sup>2</sup> ] q3wk × 3<br>Or<br>(Docetaxel [75 mg/m <sup>2</sup> ] q2wk × 4 then (5-fluorouracil [375 mg/m <sup>2</sup> ] + Epirubicin [75 mg/m <sup>2</sup> ] + Cyclophosphamide [375 mg/m <sup>2</sup> ]) q10-11d × 4) + pegfilgrastim [6mg sc] d2 of each cycle vs Docetaxel [100 mg/m <sup>2</sup> ] q3wk × 3 then (5-fluorouracil [500 mg/m <sup>2</sup> ] + Epirubicin [100 mg/m <sup>2</sup> ] + Cyclophosphamide [500 mg/m <sup>2</sup> ]) q3wk × 3<br>(Docetaxel [50 mg/m <sup>2</sup> iv d1] + Capecitabine [2000 mg/m <sup>2</sup> po d1-7]) q2wk × 8 vs Docetaxel [100 mg/m <sup>2</sup> iv d1] q3wk × 4 then Capecitabine [2000 mg/m <sup>2</sup> po d1-14] q3wk × 4 preoperative | 51 | No | ✓ 2016[83] |
|----------------|------------------------------------------|-------------------------------------------------------------------------------------------------------------------------------------------------------------------------------------------------------------------------------------------------------------------------------------------------------------------------------------------------------------------------------------------------------------------------------------------------------------------------------------------------------------------------------------------------------------------------------------------------------------------------------------------------------------------------------------------------------------------------------------------------------------------------------------------------------------------|----|----|------------|

### Cohort 6: Sequencing of sequential anthracycline and taxane chemotherapy

| Trial & year code | Trial name                                      | Comparisons                                                                                                                                                                                                                                                                                                                                                                                                                                              | N   | Received | Published           |
|-------------------|-------------------------------------------------|----------------------------------------------------------------------------------------------------------------------------------------------------------------------------------------------------------------------------------------------------------------------------------------------------------------------------------------------------------------------------------------------------------------------------------------------------------|-----|----------|---------------------|
| 6607<br>2000N     | DFCI 99278, USA                                 | Doxorubicin [60mg/m <sup>2</sup> iv] q2wk × 4 preoperative then Paclitaxel [80mg/m <sup>2</sup> iv] qwk × 9 preoperative/postoperative vs Paclitaxel [80mg/m <sup>2</sup> iv] qwk × 9 preoperative then Doxorubicin [60mg/m <sup>2</sup> iv] q2wk × 4 preoperative/postoperative                                                                                                                                                                         | 62  | No       | ✓ 2005[82]          |
| 40801<br>2002K    | Goyang Neoadjuvant Crossover Trial, South Korea | (Doxorubicin [60mg/m <sup>2</sup> d1] + Cyclophosphamide [600mg/m <sup>2</sup> d1]) q3wk × 4 preoperative then (Docetaxel [75mg/m <sup>2</sup> d1] + Capecitabine [1000mg/m <sup>2</sup> bd d1-14]) q3wk × 4 postoperative vs (Docetaxel [75mg/m <sup>2</sup> d1] + Capecitabine [1000mg/m <sup>2</sup> bd d1-14]) q3wk × 4 preoperative then (Doxorubicin [60mg/m <sup>2</sup> d1] + Cyclophosphamide [600mg/m <sup>2</sup> d1]) q3wk × 4 postoperative | 209 | Yes      | ✓ 2008[84]          |
| 45101<br>2002U    | Mount Vernon & Baylor College TAC, UK           | (Doxorubicin [60 mg/m <sup>2</sup> ] + Cyclophosphamide [600 mg/m <sup>2</sup> ]) × 4 preoperative then Docetaxel [100 mg/m <sup>2</sup> ] × 4 postoperative vs Docetaxel [100 mg/m <sup>2</sup> ] × 4 preoperative then (Doxorubicin [60 mg/m <sup>2</sup> ] + Cyclophosphamide [600 mg/m <sup>2</sup> ]) × 4 postoperative                                                                                                                             | 120 | No       | ✓ Abstract 2007[86] |
| 36602<br>2003L    | AERO-B03, France                                | (Epirubicin[100mg/m <sup>2</sup> ] + Cyclophosphamide [600mg/m <sup>2</sup> ] + Pegfilgrastim [d2]) q2wk × 4 then (Docetaxel [100mg/m <sup>2</sup> ] + Pegfilgrastim [6mg d2]) q2wk × 4 vs (Docetaxel [75mg/m <sup>2</sup> ] + Epirubicin[75mg/m <sup>2</sup> ] + Cyclophosphamide [500mg/m <sup>2</sup> ] + Pegfilgrastim [6mg d2]) q3wk × 6                                                                                                            | 65  | Yes      | ✓ 2007[85]          |
| 38301<br>2003[    | KBCOG-02, Japan                                 | (Epirubicin[75mg/m <sup>2</sup> ] + Cyclophosphamide [600mg/m <sup>2</sup> ]) q3wk × 4 preoperative then Paclitaxel [80mg/m <sup>2</sup> ] qwk × 12 postoperative vs Paclitaxel [80mg/m <sup>2</sup> ] qwk × 12 preoperative then (Epirubicin[75mg/m <sup>2</sup> ] + Cyclophosphamide [600mg/m <sup>2</sup> ]) q3wk × 4 postoperative                                                                                                                   | 171 | Yes      | ✓ Abstract 2008[87] |
| 50601<br>2004^    | OSU Chemotherapy Sequencing, USA                | (Doxorubicin [60mg/m <sup>2</sup> iv] + cyclophosphamide [600 mg/m <sup>2</sup> iv]) q2wk × 4 then docetaxel [75mg/m <sup>2</sup> iv] q2wk × 4 then pegfilgrastim [6mg sc] following each chemotherapy cycle vs Docetaxel [75mg/m <sup>2</sup> iv] q2wk × 4 then                                                                                                                                                                                         | 56  | No       | ✓ 2008[88]          |

|                |                                           |                                                                                                                                                                                                                                                                                                                                                                                                                                                                                                                                                                                                                                                                                                                                                                                      |     |     |            |
|----------------|-------------------------------------------|--------------------------------------------------------------------------------------------------------------------------------------------------------------------------------------------------------------------------------------------------------------------------------------------------------------------------------------------------------------------------------------------------------------------------------------------------------------------------------------------------------------------------------------------------------------------------------------------------------------------------------------------------------------------------------------------------------------------------------------------------------------------------------------|-----|-----|------------|
|                |                                           | (doxorubicin [60mg/m2 iv] + cyclophosphamide [600 mg/m2 iv]) q2wk x 4 then pegfilgrastim [6mg sc] following each chemotherapy cycle                                                                                                                                                                                                                                                                                                                                                                                                                                                                                                                                                                                                                                                  |     |     |            |
| 53101<br>2004{ | SETUP / ACTRN12605000588695,<br>Australia | (5-fluorouracil [500mg/m2 iv] + Epirubicin [100mg/m2 iv] + Cyclophosphamide [500mg/m2 iv]) q3wk x 4 then Docetaxel [100mg/m2 iv] preoperative vs Docetaxel [100mg/m2 iv] then (5-fluorouracil [500mg/m2 iv] + Epirubicin [100mg/m2 iv] + Cyclophosphamide [500mg/m2 iv]) q3wk x 4 preoperative                                                                                                                                                                                                                                                                                                                                                                                                                                                                                       | 69  | No  | ✓ 2014[89] |
| 46401<br>2005@ | UZLeuven Chemotherapy trial               | (5-fluorouracil [500 mg/m2] + Epirubicin [100 mg/m2] + Cyclophosphamide [500 mg/m2]) q3wk x 3 then Docetaxel [100 mg/m2] q3wk x 3 vs Docetaxel [100 mg/m2] q3wk x 3 then (5-fluorouracil [500 mg/m2] + Epirubicin [100 mg/m2] + Cyclophosphamide [500 mg/m2]) q3wk x 3<br>Or<br>(5-fluorouracil [375 mg/m2] + Epirubicin [75 mg/m2] + Cyclophosphamide [375 mg/m2]) q10-11d x 4 then Docetaxel [75 mg/m2] q2wk x 4 + pegfilgrastim [6mg sc] d2 of each cycle vs (Docetaxel [75 mg/m2] q2wk x 4 then (5-fluorouracil [375 mg/m2] + Epirubicin [75 mg/m2] + Cyclophosphamide [375 mg/m2]) q10-11d x 4) + pegfilgrastim [6mg sc] d2 of each cycle                                                                                                                                       | 85  | Yes | ✓ 2009[81] |
| 1812<br>2005A  | Neo-tAnGo Trial, UK                       | (Epirubicin[90mg/m <sup>2</sup> ] + Cyclophosphamide [600mg/m <sup>2</sup> d1]) q3wk x 4 preoperative then Paclitaxel [175mg/m <sup>2</sup> d1] q2wk x 4 preoperative vs Paclitaxel [175mg/m <sup>2</sup> d1] q2wk x 4 preoperative then (Epirubicin[90mg/m <sup>2</sup> ] + Cyclophosphamide [600mg/m <sup>2</sup> d1]) q3wk x 4 preoperative<br>Or<br>(Epirubicin[90mg/m <sup>2</sup> ] + Cyclophosphamide [600mg/m <sup>2</sup> d1]) q3wk x 4 preoperative then (Paclitaxel [175mg/m <sup>2</sup> d1] + Gemcitabine [2g/m <sup>2</sup> d1]) q2wk x 4 preoperative vs (Paclitaxel [175mg/m <sup>2</sup> d1] + Gemcitabine [2g/m <sup>2</sup> d1]) q2wk x 4 preoperative then (Epirubicin[90mg/m <sup>2</sup> ] + Cyclophosphamide [600mg/m <sup>2</sup> d1]) q3wk x 4 preoperative | 828 | Yes | ✓ 2014[90] |
| 24903<br>2005X | NCT00123929 H San Carlos Madrid,<br>Spain | Doxorubicin [75 mg/m2] q3wk x 4 preoperative then surgery then Docetaxel [100 mg/m2] q3wk x 4 + Radiotherapy + Tam/Als if ER+/PR+ vs Docetaxel [100 mg/m2] q3wk x 4 preoperative then surgery then Doxorubicin [75mg/m2] q3wk x 4 + Radiotherapy + Tam/Als if ER+/PR+                                                                                                                                                                                                                                                                                                                                                                                                                                                                                                                | 204 | No  | ✓ 2011[91] |
| 50701<br>2006N | Shiga Chemotherapy Sequencing,<br>Japan   | (5-Fluorouracil [500 mg/m2] + Epirubicin [110 mg/m2] + Cyclophosphamide [500 mg/m2]) q3wk x 3 then Docetaxel [100mg/m2] q3wk x 3 vs Docetaxel [100mg/m2] q3wk x 3 then (5-Fluorouracil [500 mg/m2] + Epirubicin [110 mg/m2] + Cyclophosphamide [500 mg/m2]) q3wk x 3                                                                                                                                                                                                                                                                                                                                                                                                                                                                                                                 | 42  | No  | ✓ 2013[92] |
| 32502<br>2007Y | ACOSOG Z1041, USA                         | 5-Fluorouracil [500 mg/m2 iv] + Epirubicin [75 mg/m2 iv] + Cyclophosphamide [500 mg/m2] d1 q3wk x 4 then (Paclitaxel [80 mg/m2] + Trastuzumab [4 mg/kg loading dose and 2 mg/kg weekly dose] d1, d8, d15) q3wk x 4 preoperative then surgery then Trastuzumab [6 mg/kg] d1 q21d for up to 52 wks vs Paclitaxel [80 mg/m2] + Trastuzumab [4 mg/kg loading dose and 2 mg/kg weekly dose] d1, d8, d15 q3wk x 4 then 5-Fluorouracil [500 mg/m2 iv] + Epirubicin [75 mg/m2 iv] + Cyclophosphamide [500                                                                                                                                                                                                                                                                                    | 282 | Yes | ✓ 2019[93] |

|                |                  |                                                                                                                                                                                                                                                                                                                                                                                                                                                                                                                                                                                                                                                                                                                                                                                                                                                                                                            |     |     |                    |
|----------------|------------------|------------------------------------------------------------------------------------------------------------------------------------------------------------------------------------------------------------------------------------------------------------------------------------------------------------------------------------------------------------------------------------------------------------------------------------------------------------------------------------------------------------------------------------------------------------------------------------------------------------------------------------------------------------------------------------------------------------------------------------------------------------------------------------------------------------------------------------------------------------------------------------------------------------|-----|-----|--------------------|
| 48102<br>2009U | JBCRG-10, Japan  | mg/m <sup>2</sup> ] d1 q3w × 4 + Trastuzumab [2 mg/kg] d1, d8, d15 q3wk × 4 concurrently preoperative then surgery then Trastuzumab [6 mg/kg] d1 q21d for up to 52 wks<br>(5-fluorouracil [500mg/m <sup>2</sup> ] + Epirubicin [100mg/m <sup>2</sup> ] + Cyclophosphamide [500mg/m <sup>2</sup> ] q3wk) × 4 then (Docetaxel [75mg/m <sup>2</sup> ] + Cyclophosphamide [600mg/m <sup>2</sup> ] q3wk + Trastuzumab [4mg/kg loading dose then 2mg/kg thereafter] qwk or [8mg/kg loading dose then 6mg/kg thereafter q3wk]) × 4 preoperative vs (Docetaxel [75mg/m <sup>2</sup> ] + Cyclophosphamide [600mg/m <sup>2</sup> ] q3wk + Trastuzumab [4mg/kg loading dose then 2mg/kg thereafter] qwk or [8mg/kg loading dose then 6mg/kg thereafter q3wk]) × 4 then (5-fluorouracil [500mg/m <sup>2</sup> ] + Epirubicin [100mg/m <sup>2</sup> ] + Cyclophosphamide [500mg/m <sup>2</sup> ] q3wk) × 4 preoperative | 42  | Yes | ✓ Abstract 2020[8] |
| 48103<br>2009V | JBCRG-09, Japan  | (5-Fluoro-Uracil [500 mg/m <sup>2</sup> iv] + Epirubicin [100 mg/m <sup>2</sup> iv] + Cyclophosphamide [500 mg/m <sup>2</sup> iv]) q3wk × 3 then (Docetaxel [75 mg/m <sup>2</sup> iv] + Cyclophosphamide [600 mg/m <sup>2</sup> iv]) q3wk × 3 preoperative vs (Docetaxel [75 mg/m <sup>2</sup> iv] + Cyclophosphamide [600 mg/m <sup>2</sup> iv] ) q3wk × 3 then (5-Fluoro-Uracil [500 mg/m <sup>2</sup> iv] + Epirubicin [100 mg/m <sup>2</sup> iv] + Cyclophosphamide [500 mg/m <sup>2</sup> iv]) q3wk × 3 preoperative                                                                                                                                                                                                                                                                                                                                                                                  | 128 | Yes | ✓ 2020[9]          |
| 1223<br>2010G  | SWOG S0800, USA  | (Doxorubicin [60 mg/m <sup>2</sup> iv d1] + cyclophosphamide [600mg/m <sup>2</sup> iv d1] + pegfilgrastim [6mg sc d2]) q2wk × 6 then Nab-paclitaxel [100mg/m <sup>2</sup> iv d1] qwk × 12 preoperative vs Nab-paclitaxel [100mg/m <sup>2</sup> iv] qwk × 12 then (doxorubicin [60 mg/m <sup>2</sup> iv d1] + cyclophosphamide [600mg/m <sup>2</sup> iv d1] + pegfilgrastim [6mg sc d2]) q2wk × 6 preoperative                                                                                                                                                                                                                                                                                                                                                                                                                                                                                              | 116 | Yes | ✓ 2016[94]         |
| 29902<br>2010J | NeoSAMBA, Brazil | (5-Fluoro-Uracil [500mg/m <sup>2</sup> iv] + Doxorubicin [50mg/m <sup>2</sup> iv] + Cyclophosphamide [500mg/m <sup>2</sup> iv]) q21d × 3 then Docetaxel [100mg/m <sup>2</sup> iv] q21d × 3 preoperative vs Docetaxel [100mg/m <sup>2</sup> iv] q21d × 3 then (5-Fluoro-Uracil [500mg/m <sup>2</sup> iv] + Doxorubicin [50mg/m <sup>2</sup> iv] + Cyclophosphamide [500mg/m <sup>2</sup> iv]) q21d × 3 preoperative                                                                                                                                                                                                                                                                                                                                                                                                                                                                                         | 120 | Yes | ✓ 2020[95]         |

## Cohort 7: Longer vs shorter duration of anthracycline

| Trial & year code                                                                       | Trial name                           | Comparisons                                                                                                                                                                                                                                                                                                                                                    | N   | Received | Published |
|-----------------------------------------------------------------------------------------|--------------------------------------|----------------------------------------------------------------------------------------------------------------------------------------------------------------------------------------------------------------------------------------------------------------------------------------------------------------------------------------------------------------|-----|----------|-----------|
| <b>(a) Longer versus shorter less than 6 months of polychemotherapy (anthracycline)</b> |                                      |                                                                                                                                                                                                                                                                                                                                                                |     |          |           |
| 6601-02,<br>6604<br>1974D                                                               | Adjuvant Breast 74-063 A, USA        | (Cyclophosphamide [500 mg/m <sup>2</sup> iv] + Doxorubicin [45 mg/m <sup>2</sup> iv]) q3wk × 10 vs (Cyclophosphamide [500 mg/m <sup>2</sup> iv] + Doxorubicin [45 mg/m <sup>2</sup> iv]) q3wk × 5                                                                                                                                                              | 299 | Yes      | 1987[96]  |
| 19305, 07,<br>09, 11<br>1982Z                                                           | Metaneira B Stage II and III, Greece | Oophorectomy + (Vincristine [0.9 mg/m <sup>2</sup> iv d1] + Doxorubicin [35 mg/m <sup>2</sup> iv d1] + Cyclophosphamide [100 mg po tds d1-4]) qm × 3 + (5-Fluoro-Uracil [440 mg/m <sup>2</sup> iv d1,8] + Doxorubicin [25 mg/m <sup>2</sup> iv d1,8] + Cyclophosphamide [50 mg po tds d1-15]) × 7 vs Oophorectomy + (Vincristine [0.9 mg/m <sup>2</sup> iv d1] | 308 | Yes      | No        |

|                  |                        |                                                                                                                                                                                                                                                                                                                                                                                                                                                                                                                                                                                                                                                                                                                                                                                                                                                                             |      |     |                        |
|------------------|------------------------|-----------------------------------------------------------------------------------------------------------------------------------------------------------------------------------------------------------------------------------------------------------------------------------------------------------------------------------------------------------------------------------------------------------------------------------------------------------------------------------------------------------------------------------------------------------------------------------------------------------------------------------------------------------------------------------------------------------------------------------------------------------------------------------------------------------------------------------------------------------------------------|------|-----|------------------------|
|                  |                        | + Doxorubicin [35 mg/m <sup>2</sup> iv d1] + Cyclophosphamide [100 mg po tds d1-4])<br>qm x 3                                                                                                                                                                                                                                                                                                                                                                                                                                                                                                                                                                                                                                                                                                                                                                               |      |     |                        |
| 13001<br>1986P1  | FASG GFEA 01, France   | (Epirubicin[50mg/m <sup>2</sup> iv] + 5-Fluoro-Uracil [500mg/m <sup>2</sup> iv] +<br>Cyclophosphamide [500mg/m <sup>2</sup> iv]) q21d x 3 then Radiotherapy then<br>(Epirubicin[50mg/m <sup>2</sup> iv] + 5-Fluoro-Uracil [500mg/m <sup>2</sup> iv] +<br>Cyclophosphamide [500mg/m <sup>2</sup> iv]) q21d x 3 vs (Epirubicin[50mg/m <sup>2</sup> iv] + 5-<br>Fluoro-Uracil [500mg/m <sup>2</sup> iv] + Cyclophosphamide [500mg/m <sup>2</sup> iv]) q21d x 3<br>then Radiotherapy                                                                                                                                                                                                                                                                                                                                                                                            | 421  | Yes | ✓ 2003[97]             |
| 28001<br>1987Q   | PRONACAM 87, Argentina | (Cyclophosphamide [400mg/m <sup>2</sup> ] + Methotrexate [30mg/m <sup>2</sup> ] + 5-Fluoro-<br>Uracil [400mg/m <sup>2</sup> ] + Epirubicin[60mg/m <sup>2</sup> ] + Prednisone [40mg/m <sup>2</sup> po] x 4d)<br>q21d x 6 vs (Cyclophosphamide [400mg/m <sup>2</sup> ] + Methotrexate [30mg/m <sup>2</sup> ] + 5-<br>Fluoro-Uracil [400mg/m <sup>2</sup> ] + Epirubicin[60mg/m <sup>2</sup> ] + Prednisone [40mg/m <sup>2</sup> po]<br>x 4d) q21d x 4                                                                                                                                                                                                                                                                                                                                                                                                                        | 556  | No  | ✓ Abstract<br>1995[98] |
| 8322<br>2002B    | CALGB 40101, USA       | (Doxorubicin [60mg/m <sup>2</sup> ] + Cyclophosphamide [600mg/m <sup>2</sup> ]) q3wk x 6 vs<br>(Doxorubicin [60mg/m <sup>2</sup> ] + Cyclophosphamide [600mg/m <sup>2</sup> ]) q3wk x 4                                                                                                                                                                                                                                                                                                                                                                                                                                                                                                                                                                                                                                                                                     | 282  | Yes | ✓ 2012[70]             |
| 33206<br>2002N   | PACS 05, France        | (5-Fluorouracil [500 mg/m <sup>2</sup> iv] + Epirubicin [100 mg/m <sup>2</sup> iv] +<br>Cyclophosphamide [500 mg/m <sup>2</sup> iv]) q3wk x 6 vs (5-Fluorouracil [500 mg/m <sup>2</sup><br>iv] + Epirubicin [100 mg/m <sup>2</sup> iv] + Cyclophosphamide [500 mg/m <sup>2</sup> iv]) q3wk<br>x 4                                                                                                                                                                                                                                                                                                                                                                                                                                                                                                                                                                           | 1515 | Yes | ✓ 2017[99]             |
| 8323<br>2002X1   | CALGB 40101, USA       | (Doxorubicin [60mg/m <sup>2</sup> iv over 10-15min d1] + Cyclophosphamide<br>[600mg/m <sup>2</sup> iv bolus d1]) q2wk x 6 vs (Doxorubicin [60mg/m <sup>2</sup> iv over 10-<br>15min d1] + Cyclophosphamide [600mg/m <sup>2</sup> iv bolus d1]) q2wk x 4                                                                                                                                                                                                                                                                                                                                                                                                                                                                                                                                                                                                                     | 1300 | Yes | ✓ 2012[70]             |
| 4762/78<br>2004C | NSABP B-36, USA        | (5-Fluoro-Uracil [500mg/m <sup>2</sup> ] + Epirubicin[100mg/m <sup>2</sup> ] + Cyclophosphamide<br>[500mg/m <sup>2</sup> ]) q21d x 6 then celecoxib placebo [bid po] x 3yr vs (Doxorubicin<br>[60mg/m <sup>2</sup> ] + Cyclophosphamide [600mg/m <sup>2</sup> ]) q21d x 4 then celecoxib<br>placebo [bid po] x 3yr<br>Or<br>(5-Fluoro-Uracil [500mg/m <sup>2</sup> ] + Epirubicin[100mg/m <sup>2</sup> ] + Cyclophosphamide<br>[500mg/m <sup>2</sup> ]) q21d x 6 then celecoxib [bid po] x 3yr vs (Doxorubicin<br>[60mg/m <sup>2</sup> ] + Cyclophosphamide [600mg/m <sup>2</sup> ]) q21d x 4 then celecoxib [bid<br>po] x 3yr<br>Or<br>(5-Fluoro-Uracil [500mg/m <sup>2</sup> ] + Epirubicin[100mg/m <sup>2</sup> ] + Cyclophosphamide<br>[500mg/m <sup>2</sup> ]) q21d x 6 vs (Doxorubicin [60mg/m <sup>2</sup> ] + Cyclophosphamide<br>[600mg/m <sup>2</sup> ]) q21d x 4 | 2722 | No  | ✓ 2022[72]             |

**(b) Longer versus shorter <6 months of polychemotherapy (anthracycline and taxane)**

|                 |                                                               |                                                                                                                                                                                                                  |     |    |                         |
|-----------------|---------------------------------------------------------------|------------------------------------------------------------------------------------------------------------------------------------------------------------------------------------------------------------------|-----|----|-------------------------|
| 33103<br>1997H2 | Multicentre France Phase II<br>Neoadjuvant Chemotherapy Trial | (Doxorubicin [60mg/m <sup>2</sup> iv] + Paclitaxel [200mg/m <sup>2</sup> iv]) q3wk x 6 preoperative<br>vs (Doxorubicin [60mg/m <sup>2</sup> iv] + Paclitaxel [200mg/m <sup>2</sup> iv]) q3wk x 4<br>preoperative | 232 | No | ✓ Abstract<br>2002[100] |
|-----------------|---------------------------------------------------------------|------------------------------------------------------------------------------------------------------------------------------------------------------------------------------------------------------------------|-----|----|-------------------------|

|                 |                                         |                                                                                                                                                                                                                                                                                                                                                                                                                                                                                                                                                                                      |      |                  |             |
|-----------------|-----------------------------------------|--------------------------------------------------------------------------------------------------------------------------------------------------------------------------------------------------------------------------------------------------------------------------------------------------------------------------------------------------------------------------------------------------------------------------------------------------------------------------------------------------------------------------------------------------------------------------------------|------|------------------|-------------|
| 2619<br>1999M   | ABCSG-14, Austria                       | (Epirubicin[75mg/m <sup>2</sup> d1] + Docetaxel [75mg/m <sup>2</sup> d1] + filgrastim [5mcg/kg sc d3-10]) q3wk x 6 preoperative vs (Epirubicin[75mg/m <sup>2</sup> d1] + Docetaxel [75mg/m <sup>2</sup> d1] + filgrastim [5mcg/kg sc d3-10]) q3wk x 3 preoperative                                                                                                                                                                                                                                                                                                                   | 292  | Yes - ineligible | ✓ 2007[101] |
| 35003<br>2001S2 | GeparTrio / GBG 24, Germany             | (Doxorubicin [50mg/m <sup>2</sup> d1] + Cyclophosphamide [500mg/m <sup>2</sup> d1] + Docetaxel [75mg/m <sup>2</sup> d1]) q21d x 2 then (Doxorubicin [50mg/m <sup>2</sup> d1] then Cyclophosphamide [500mg/m <sup>2</sup> d1] + Docetaxel [75mg/m <sup>2</sup> d1]) q21d x 6 preoperative vs (Doxorubicin [50mg/m <sup>2</sup> d1] + Cyclophosphamide [500mg/m <sup>2</sup> d1] + Docetaxel [75mg/m <sup>2</sup> d1]) q21d x 2 then (Doxorubicin [50mg/m <sup>2</sup> d1] then Cyclophosphamide [500mg/m <sup>2</sup> d1] + Docetaxel [75mg/m <sup>2</sup> d1]) q21d x 4 preoperative | 1390 | Yes              | ✓ 2010[102] |
| 53501<br>2003%  | Chungnam Neoadjuvant trial, South Korea | (Epirubicin [75 mg/m <sup>2</sup> ] + Docetaxel [75 mg/m <sup>2</sup> ]) q3wk x 6 preoperative vs (Epirubicin [75 mg/m <sup>2</sup> ] + Docetaxel [75 mg/m <sup>2</sup> ]) q3wk x 4 preoperative                                                                                                                                                                                                                                                                                                                                                                                     | 176  | No               | 2009[103]   |

### Cohort 8: Higher vs lower dose anthracycline

| Trial & year code                                                                                   | Trial name                    | Comparisons                                                                                                                                                                                                                                                                                                                                                                                                                                                                | N    | Received | Published   |
|-----------------------------------------------------------------------------------------------------|-------------------------------|----------------------------------------------------------------------------------------------------------------------------------------------------------------------------------------------------------------------------------------------------------------------------------------------------------------------------------------------------------------------------------------------------------------------------------------------------------------------------|------|----------|-------------|
| <b>(a) Increase in anthracycline dose/course and total dose (&lt;100mg A or 150mg E difference)</b> |                               |                                                                                                                                                                                                                                                                                                                                                                                                                                                                            |      |          |             |
| 13001<br>1986P1                                                                                     | GFEA 01, France               | (Epirubicin[75mg/m <sup>2</sup> iv] + 5-Fluoro-Uracil [500mg/m <sup>2</sup> iv] + Cyclophosphamide [500mg/m <sup>2</sup> iv]) q21d x 3 then Radiotherapy vs (Epirubicin[50mg/m <sup>2</sup> iv] + 5-Fluoro-Uracil [500mg/m <sup>2</sup> iv] + Cyclophosphamide [500mg/m <sup>2</sup> iv]) q21d x 3 then Radiotherapy                                                                                                                                                       | 409  | Yes      | ✓ 2003[97]  |
| 8316<br>1994D1                                                                                      | CALGB 9344, USA               | (Cyclophosphamide [600mg/m <sup>2</sup> ] + Doxorubicin [75mg/m <sup>2</sup> ]) q3wk x 4 or (Cyclophosphamide [600mg/m <sup>2</sup> ] + Doxorubicin [90mg/m <sup>2</sup> ] + filgrastim [5 or 10µg/kg/d sc d2-12]) q3wk x 4 vs (Cyclophosphamide [600mg/m <sup>2</sup> ] + Doxorubicin [60mg/m <sup>2</sup> ]) q3wk x 4                                                                                                                                                    | 1580 | Yes      | ✓ 2003[24]  |
| 8316<br>1994D2                                                                                      | CALGB 9344, USA               | (Cyclophosphamide [600mg/m <sup>2</sup> ] + Doxorubicin [75mg/m <sup>2</sup> ]) q3wk x 4 then Paclitaxel [175mg/m <sup>2</sup> ] q3wk x 4 or (Cyclophosphamide [600mg/m <sup>2</sup> ] + Doxorubicin [90mg/m <sup>2</sup> ] + filgrastim [5 or 10µg/kg/d sc d2-12]) q3wk x 4 then Paclitaxel [175mg/m <sup>2</sup> ] q3wk x 4 vs (Cyclophosphamide [600mg/m <sup>2</sup> ] + Doxorubicin [60mg/m <sup>2</sup> ]) q3wk x 4 then Paclitaxel [175mg/m <sup>2</sup> ] q3wk x 4 | 1590 | Yes      | ✓ 2003[24]  |
| 46301<br>2005Z                                                                                      | CECOG/BREAST.2.2.005, Austria | (5-Fluorouracil [500 mg/m <sup>2</sup> iv] + Epirubicin [90mg/m <sup>2</sup> iv] + Cyclophosphamide [500mg/m <sup>2</sup> iv] d1 + pegfilgrastim [6mg sc] d2) q14d x 6 vs (5-Fluorouracil [500 mg/m <sup>2</sup> iv] + Epirubicin [75mg/m <sup>2</sup> iv] + Cyclophosphamide [500mg/m <sup>2</sup> iv] d1 + pegfilgrastim [6mg sc] d2) q14d x 6                                                                                                                           | 50   | No       | ✓ 2008[104] |
| <b>(b) Increase in anthracycline dose/course and total dose (&gt;100mg A or 150mg E difference)</b> |                               |                                                                                                                                                                                                                                                                                                                                                                                                                                                                            |      |          |             |
| 13006,<br>13008<br>1990C3+5                                                                         | GFEA 05, France               | (Epirubicin[100mg/m <sup>2</sup> ] + 5-Fluoro-Uracil [500mg/m <sup>2</sup> ] + Cyclophosphamide [500mg/m <sup>2</sup> ]) x 6 vs (Epirubicin[50mg/m <sup>2</sup> ] + 5-Fluoro-Uracil [500mg/m <sup>2</sup> ] + Cyclophosphamide [500mg/m <sup>2</sup> ]) x 6                                                                                                                                                                                                                | 565  | Yes      | ✓ 2005[105] |



|                                                                                |                                                                                                                |                                                                                                                                                                                                                                                                                                                                                                                                                                                                                                                                                                                                                                                                                                                                          |           |     |                      |
|--------------------------------------------------------------------------------|----------------------------------------------------------------------------------------------------------------|------------------------------------------------------------------------------------------------------------------------------------------------------------------------------------------------------------------------------------------------------------------------------------------------------------------------------------------------------------------------------------------------------------------------------------------------------------------------------------------------------------------------------------------------------------------------------------------------------------------------------------------------------------------------------------------------------------------------------------------|-----------|-----|----------------------|
| 20006-07<br>1992N                                                              | C/9/91 / HMFEC, UK                                                                                             | (Cyclophosphamide [600mg/m <sup>2</sup> d1] + Epirubicin[75mg/m <sup>2</sup> d1] + 5-Fluoro-Uracil [600mg/m <sup>2</sup> d1]) q3wk x 8 vs (Cyclophosphamide [600mg/m <sup>2</sup> d1] + Epirubicin[50mg/m <sup>2</sup> d1] + 5-Fluoro-Uracil [600mg/m <sup>2</sup> d1]) q3wk x 8<br>Or<br>(Cyclophosphamide [600mg/m <sup>2</sup> d1] + Epirubicin[75mg/m <sup>2</sup> d1] + 5-Fluoro-Uracil [600mg/m <sup>2</sup> d1]) q3wk x 8 + Tamoxifen [20mg/d] x 5yr vs<br>(Cyclophosphamide [600mg/m <sup>2</sup> d1] + Epirubicin[50mg/m <sup>2</sup> d1] + 5-Fluoro-Uracil [600mg/m <sup>2</sup> d1]) q3wk x 8 + Tamoxifen [20mg/d] x 5yr<br>Or                                                                                                | 785       | Yes | ✓ 2016[106]          |
| 12911<br>2005S                                                                 | Tianjin Chemotherapy trial, China                                                                              | (Cyclophosphamide [600 mg/m <sup>2</sup> ] + Epirubicin [100 mg/m <sup>2</sup> ] + 5-Fluorouracil [500 mg/m <sup>2</sup> ]) q21d x 6 vs (Cyclophosphamide [600 mg/m <sup>2</sup> ] + Epirubicin [60 mg/m <sup>2</sup> ] + 5-Fluorouracil [500 mg/m <sup>2</sup> ] q21d x 6)                                                                                                                                                                                                                                                                                                                                                                                                                                                              | 98        | No  | ✓ Abstract 2007[107] |
| <b>(c) Increase in anthracycline and other drug dose/course and total dose</b> |                                                                                                                |                                                                                                                                                                                                                                                                                                                                                                                                                                                                                                                                                                                                                                                                                                                                          |           |     |                      |
| 3504<br>0977S                                                                  | B1/ Protocol 7701, Italy                                                                                       | (Cyclophosphamide [50-100-150 mg/m <sup>2</sup> po d1-14] + Methotrexate [20-40-60 mg/m <sup>2</sup> iv d1,8] + 5-Fluoro-Uracil [400-600-800 mg/m <sup>2</sup> iv d1,8] + Prednisolone [40 mg/m <sup>2</sup> im d1-14]) q4w x 6 then (Doxorubicin [50-75 mg/m <sup>2</sup> iv d1,8] + Vincristine [1.4 mg/m <sup>2</sup> iv d1,8]) q4wk x 4 [intensification every 2 cycles] vs (Cyclophosphamide [100 mg/m <sup>2</sup> po d1-14] + Methotrexate [40 mg/m <sup>2</sup> iv d1,8] + 5-Fluoro-Uracil [600 mg/m <sup>2</sup> iv d1,8] + Prednisolone [40 mg/m <sup>2</sup> im d1-14]) q4wk x 6 then (Doxorubicin [60 mg/m <sup>2</sup> iv d1,8] + Vincristine [1.4 mg/m <sup>2</sup> iv d1,8]) q4wk x 4                                     | 140       | Yes | ✓ Abstract 1985[108] |
| 8307<br>1985A                                                                  | CALGB Study CLB-8541, USA                                                                                      | (Cyclophosphamide [600 mg/m <sup>2</sup> iv d1] + Doxorubicin [60 mg/m <sup>2</sup> iv d1] + 5-Fluoro-Uracil [600 mg/m <sup>2</sup> iv d1,8]) q4w x 4 vs (Cyclophosphamide [300 mg/m <sup>2</sup> iv d1] + Doxorubicin [30 mg/m <sup>2</sup> iv d1] + 5-Fluoro-Uracil [300 mg/m <sup>2</sup> iv d1,8]) q4w x 4                                                                                                                                                                                                                                                                                                                                                                                                                           | 1050      | Yes | ✓ 1994[110]          |
| 25701<br>1988R                                                                 | Jules Bordet Classical CMF Versus EC Standard Dose Versus EC High Dose in Node Positive Breast Cancer, Belgium | (Epirubicin[100mg/m <sup>2</sup> iv d1] + Cyclophosphamide [830mg/m <sup>2</sup> iv] d1) q21d x 8 vs (Epirubicin[60mg/m <sup>2</sup> iv d1] + Cyclophosphamide [500mg/m <sup>2</sup> iv d1]) q21d x 8                                                                                                                                                                                                                                                                                                                                                                                                                                                                                                                                    | 537       | Yes | ✓ 2009[109]          |
| 1132<br>1991F                                                                  | MD Anderson Neoadjuvant Trial, USA                                                                             | (5-Fluoro-Uracil [1200mg/m <sup>2</sup> ] + Doxorubicin [60mg/m <sup>2</sup> ] + Cyclophosphamide [1000mg/m <sup>2</sup> ] + G-CSF [5µg/kg/d d4-17]) q18d x 4 preoperative vs (5-Fluoro-Uracil [1000mg/m <sup>2</sup> ] + Doxorubicin [50mg/m <sup>2</sup> ] + Cyclophosphamide [500mg/m <sup>2</sup> ]) q21d x 4 preoperative                                                                                                                                                                                                                                                                                                                                                                                                           | 112       | No  | ✓ Abstract 1999[111] |
| 13013<br>1993@                                                                 | GFEA Inflammatory BC trial, France                                                                             | (5-Fluoro-Uracil [750 mg/m <sup>2</sup> iv d1-4] + Epirubicin [35 mg/m <sup>2</sup> iv d2-4] + Cyclophosphamide [400 mg/m <sup>2</sup> iv d2-4] + lenograstim) preoperative then (Radiotherapy or Surgery) then (5-Fluoro-Uracil [500 mg/m <sup>2</sup> iv d1] + Epirubicin [75 mg/m <sup>2</sup> iv d1] + Cyclophosphamide [500 mg/m <sup>2</sup> iv d1]) x 4 postoperative vs (5-Fluoro-Uracil [500 mg/m <sup>2</sup> iv d1] + Epirubicin [75 mg/m <sup>2</sup> iv d1] + Cyclophosphamide [500 mg/m <sup>2</sup> iv d1]) preoperative then (Radiotherapy or Surgery) then (5-Fluoro-Uracil [500 mg/m <sup>2</sup> iv d1] + Epirubicin [75 mg/m <sup>2</sup> iv d1] + Cyclophosphamide [500 mg/m <sup>2</sup> iv d1]) x 4 postoperative | Not known | No  |                      |

|                |                                                       |                                                                                                                                                                                                                                                                                                                                                                                                                                                                                                                                          |      |     |                      |
|----------------|-------------------------------------------------------|------------------------------------------------------------------------------------------------------------------------------------------------------------------------------------------------------------------------------------------------------------------------------------------------------------------------------------------------------------------------------------------------------------------------------------------------------------------------------------------------------------------------------------------|------|-----|----------------------|
| 2616<br>1994Q  | ABCSG Trial X, Austria                                | (Epirubicin[60mg/m <sup>2</sup> iv d1,d2] + Cyclophosphamide [600mg/m <sup>2</sup> iv d1,d2] + Uromitexan + filgrastim [5mcg/kg sc d3-13]) q3wk x 4 then (Cyclophosphamide [600mg/m <sup>2</sup> ] + Methotrexate [40mg/m <sup>2</sup> ] + 5-Fluoro-Uracil [600mg/m <sup>2</sup> ]) q3wk x 4 vs (Epirubicin[60mg/m <sup>2</sup> iv d1] + Cyclophosphamide [600mg/m <sup>2</sup> iv d1]) q3w x 4 then (Cyclophosphamide [600mg/m <sup>2</sup> ] + Methotrexate [40mg/m <sup>2</sup> ] + 5-Fluoro-Uracil [600mg/m <sup>2</sup> ]) q3wk x 4 | 112  | Yes | No                   |
| 21102<br>1996L | OCSGL Trial, Poland                                   | (Cyclophosphamide [75mg/m <sup>2</sup> po d1-14] + Epirubicin[60mg/m <sup>2</sup> iv d1,8] + 5-Fluoro-Uracil [500mg/m <sup>2</sup> iv d1,8]) q28d x 6 then Tamoxifen x 3yr vs (5-Fluoro-Uracil [500mg/m <sup>2</sup> iv] + Epirubicin[50mg/m <sup>2</sup> iv] + Cyclophosphamide [500mg/m <sup>2</sup> iv]) q21d x 6 then Tamoxifen x 3yr                                                                                                                                                                                                | 87   | No  | ✓ 2003[112]          |
| 16213<br>1996V | Gustave-Roussy Neoadjuvant Chemotherapy Trial, France | (5-Fluoro-Uracil [1000mg/m <sup>2</sup> d1] + Cyclophosphamide [1000mg/m <sup>2</sup> d1] + Epirubicin[100mg/m <sup>2</sup> d1 iv]) q21d x 4 + G-CSF [5µg/m <sup>2</sup> sc d6-11] preoperative vs (5-Fluoro-Uracil [500mg/m <sup>2</sup> d1] + Cyclophosphamide [500mg/m <sup>2</sup> d1] + Epirubicin[60mg/m <sup>2</sup> d1 iv]) q21d x 4 preoperative                                                                                                                                                                                | 84   | Yes | ✓ Abstract 2003[113] |
| 21611<br>2001Q | SBG 2000-1 / SBG CEF-60, Sweden                       | (5-Fluoro-Uracil [600mg/m <sup>2</sup> ] + Epirubicin[75-90mg/m <sup>2</sup> ] + Cyclophosphamide [900-1200mg/m <sup>2</sup> ]) q3wk x 6 vs (5-Fluoro-Uracil [600mg/m <sup>2</sup> ] + Epirubicin[60mg/m <sup>2</sup> ] + Cyclophosphamide [600mg/m <sup>2</sup> ]) q3wk x 6                                                                                                                                                                                                                                                             | 1052 | Yes | ✓ 2018[114]          |
| 2024<br>2004=  | SBG 2004-1 Phase II Feasibility, Sweden               | (Epirubicin[start 90mg/m <sup>2</sup> ] + Cyclophosphamide [start 600mg/m <sup>2</sup> ]) escalating q2wk x 4 then Docetaxel [start 75mg/m <sup>2</sup> ] escalating q2wk x 4 + lenograstim [5mcg/kg d4-11] or pegfilgrastim [6mg d2] + Ciprofloxacin vs (Epirubicin[90mg/m <sup>2</sup> ] + Cyclophosphamide [600mg/m <sup>2</sup> ]) q2wk x 4 then Docetaxel [75mg/m <sup>2</sup> ] q2wk x 4 + lenograstim [5mcg/kg d4-11] or pegfilgrastim [6mg d2] + Ciprofloxacin                                                                   | 84   | Yes | ✓ 2018[115]          |

## Reference list

1. Blum JL, Flynn PJ, Yothers G, et al. Anthracyclines in early breast cancer: the ABC Trials--USOR 06-090, NSABP B-46-I/USOR 07132, and NSABP B-49 (NRG Oncology). *J Clin Oncol*; 2017. p. 2647-55.
2. Chen X, Ye G, Zhang C, Li X, Shen K. Non-anthracycline-containing docetaxel and cyclophosphamide regimen is associated with sustained worse outcome compared with docetaxel, anthracycline and cyclophosphamide in neoadjuvant treatment of triple negative and HER2-positive breast cancer patients: updated follow-up data from NATT study. *Chin J Cancer Res*; 2016. p. 561-9.
3. Ejlertsen B, Tuxen MK, Jakobsen EH, et al. Adjuvant cyclophosphamide and docetaxel with or without epirubicin for early TOP2A-normal breast cancer: DBCG 07-READ, an open-label, phase III, randomized trial. *J Clin Oncol*; 2017. p. 2639-46.
4. Abe H, Mori T, Kawai Y, et al. Feasibility study of docetaxel and cyclophosphamide six-cycle therapy as adjuvant chemotherapy for Japanese human epidermal growth factor receptor 2-negative breast cancer patients. *Asian Pacific Journal of Cancer Prevention: Apjcp*; 2013. p. 4835-8.
5. Narui K, Ishikawa T, Shimizu D, et al. Anthracycline could be essential for triple-negative breast cancer: A randomised phase II study by the Kanagawa Breast Oncology Group (KBOG) 1101. *The Breast*; 2019. p. 1-9.
6. Janni W, Nitz U, Rack BK, et al. Pooled analysis of two randomized phase III trials (PlanB/SuccessC) comparing six cycles of docetaxel and cyclophosphamide to sequential anthracycline taxane chemotherapy in patients with intermediate and high risk HER2-negative early breast cancer (n=5,923). *Journal of Clinical Oncology*; 2018. p. A522.
7. Nitz U, Gluz O, Clemens M, et al. West German Study PlanB trial: adjuvant four cycles of epirubicin and cyclophosphamide plus docetaxel versus six cycles of docetaxel and cyclophosphamide in HER2-negative early breast cancer. *J Clin Oncol*; 2019. p. 799-808.
8. Ueno T, Masuda N, Sato N, et al. Multicenter study of primary systemic therapy with docetaxel, cyclophosphamide and trastuzumab for HER2-positive operable breast cancer: the JBCRG-10 study. *Jpn J Clin Oncol*; 2020. p. 3-11.
9. Ishiguro H, Masuda N, Sato N, et al. A randomized study comparing docetaxel/cyclophosphamide (TC), 5-fluorouracil/epirubicin/cyclophosphamide (FEC) followed by TC, and TC followed by FEC for patients with hormone receptor-positive HER2-negative primary breast cancer. *Breast Cancer Res Treat*; 2020. p. 715-24.
10. Yu K-D, Liu X-Y, Chen L, et al. Anthracycline-free or short-term regimen as adjuvant chemotherapy for operable breast cancer: A phase III randomized non-inferiority trial. *The Lancet Regional Health - Western Pacific*; 2021. p. 100158.
11. Watanabe T, Kuranami M, Inoue K, et al. Comparison of an AC-taxane versus AC-free regimen and paclitaxel versus docetaxel in patients with lymph node-positive breast cancer: Final results of the National Surgical Adjuvant Study of Breast Cancer 02 trial, a randomized comparative phase 3 study. *Cancer*; 2017. p. 759-68.
12. Bognoux P, Combe M, Goudier M-J, Facchini T, Lotz V. Phase II randomized trial of docetaxel (D) monotherapy vs epirubicin plus docetaxel (ED) as neoadjuvant treatment of operable breast cancer (BC). *J Clin Oncol*; 2004. p. 27s, A599.
13. Yoo C, Kim S-B, Ahn J-H, et al. A randomized phase II trial of capecitabine plus vinorelbine followed by docetaxel versus adriamycin plus cyclophosphamide followed by docetaxel as neoadjuvant chemotherapy for breast cancer. *Cancer Res Treat*; 2015. p. 406-15.
14. Piccart M, J. van 't Veer L, Poncet C, et al. 70-gene signature as an aid for treatment decisions in early breast cancer: updated results of the phase 3 randomised MINDACT trial with an exploratory analysis by age. *Lancet Oncol*; 2021. p. 476-88.
15. Pierga J, Asselain B, Alsafadi S, et al. A prospective randomized trial evaluating gene expression arrays to select neoadjuvant chemotherapy regimen for operable breast cancer: first report of the Remagus04 trial. *Annals of Oncology*; 2012. p. ix3, A2450.
16. Steger GG, Greil R, Hubalek M, et al. Bevacizumab in combination with docetaxel+trastuzumab +/- non-pegylated liposomal doxorubicin: Final results of ABCSG-32, a prospective, randomized phase II-study. *Cancer Res*; 2015. p. P3-11-06.
17. Wang J, Li Q, Mu Y, et al. A randomized phase III trial comparing dose-dense epirubicin and cyclophosphamide (ECdd) followed by paclitaxel (T) with paclitaxel plus carboplatin (PCdd) as adjuvant chemotherapy for early triple-negative breast cancer patients with high-recurrence risk. *J Clin Oncol*; 2019. p. A528.
18. Slamon D, Eiermann W, Robert N, et al. Adjuvant trastuzumab in HER2-positive breast cancer. *N Engl J Med*; 2011. p. 1273-83.

19. Zhang P, Yin Y, Mo H, et al. Better pathologic complete response and relapse-free survival after carboplatin plus paclitaxel compared with epirubicin plus paclitaxel as neoadjuvant chemotherapy for locally advanced triple-negative breast cancer: a randomized phase 2 trial. *Oncotarget*; 2016. p. 60647-56.
20. Schneeweiss A, Chia S, Hickish T, et al. Long-term efficacy analysis of the randomised, phase II TRYPHAENA cardiac safety study: Evaluating pertuzumab and trastuzumab plus standard neoadjuvant anthracycline-containing and anthracycline-free chemotherapy regimens in patients with HER2-positive early breast cancer. *Eur J Cancer*; 2018. p. 27-35.
21. Yuan P, Du F, Wang J, Ma F, Fan Y, Xu B. Comparison of four cycles epirubicin and cyclophosphamide (EC) followed by four cycles docetaxel (T) versus six cycles docetaxel and carboplatin (TP) as adjuvant chemotherapy for women with operable triple negative breast cancer. *J Clin Oncol*; 2016. p. A1068.
22. Huang L, Chen S, Yang W, et al. Efficacy and safety analysis of trastuzumab and paclitaxel based regimen plus carboplatin or epirubicin as neoadjuvant therapy for clinical stage II-III, HER2-positive breast cancer patients: a phase 2, open-label, multicenter, randomized trial. *Oncotarget*; 2015. p. 18683-92.
23. Yu K, Ye F, He M, et al. Effect of adjuvant paclitaxel and carboplatin on survival in women with triple-negative breast cancer: a phase 3 randomized clinical trial. *JAMA Oncology*; 2020. p. 1390-6.
24. Henderson IC, Berry DA, Demetri GD, et al. Improved outcomes from adding sequential paclitaxel but not from escalating doxorubicin dose in an adjuvant chemotherapy regimen for patients with node-positive primary breast cancer. *J Clin Oncol*; 2003. p. 976-83.
25. Bear HD, Anderson S, Brown A, et al. The effect on tumor response of adding sequential preoperative docetaxel to preoperative doxorubicin and cyclophosphamide: preliminary results from National Surgical Adjuvant Breast and Bowel Project Protocol B-27. *J Clin Oncol*; 2003. p. 4165-74.
26. Mamounas EP, Bryant J, Lembersky B, et al. Paclitaxel after doxorubicin plus cyclophosphamide as adjuvant chemotherapy for node-positive breast cancer: results from NSABP B-28. *J Clin Oncol*; 2005. p. 3686-96.
27. Bianco AR, De Laurentiis M, De Placido S, et al. Sequential epirubicin-docetaxel-CMF as adjuvant therapy for node-positive early-stage breast cancer: Subgroup analysis of the TAXit216 randomized trial. 2008 Breast Cancer Symposium. 2008; 2008. p. A187.
28. Vici P, Brandi M, Giotta F, et al. A multicenter phase III prospective randomized trial of high-dose epirubicin in combination with cyclophosphamide (EC) versus docetaxel followed by EC in node-positive breast cancer. GOIM (Gruppo Oncologico Italia Meridionale) 9902 study. *Annals of Oncology*; 2012. p. 1121-9.
29. Gonçalves A, Pierga J-Y, Ferrero J-M, et al. UNICANCER-PEGASE 07 study: a randomized phase III trial evaluating postoperative docetaxel-5FU regimen after neoadjuvant dose-intense chemotherapy for treatment of inflammatory breast cancer. *Ann Oncol*; 2015. p. 1692-7.
30. Schenker M, Badulescu F, Badulescu A, et al. Role of paclitaxel in neoadjuvant chemotherapy in stage IIA-IIIa breast cancer. *Eur J Cancer Suppl*; 2009. p. 284, A5079.
31. Polyzos, A.; Malamos, N.; Boukovinas, I.; Adamou, A.; Ziras, N.; Kalbakis, K.; Kakolyris, S.; Syrigos, K.; Papakotoulas, P.; Kouroussis, C.; Karvounis, N.; Vamvakas, L.; Christophyllakis, C.; Athanasiadis, A.; Varthalitis, I.; Georgoulas, V., and Mavroudis, D. FEC versus sequential docetaxel followed by epirubicin/cyclophosphamide as adjuvant chemotherapy in women with axillary node-positive early breast cancer: a randomized study of the Hellenic Oncology Research Group (HORG). 2010; 119, (1): 95-104.
32. Fountzilias G, Skarlos D, Dafni U, et al. Postoperative dose-dense sequential chemotherapy with epirubicin, followed by CMF with or without paclitaxel, in patients with high-risk operable breast cancer: a randomized phase III study conducted by the Hellenic Cooperative Oncology Group. *Ann Oncol*; 2005. p. 1762-71.
33. Boccardo F, Amadori D, Guglielmini P, et al. Epirubicin followed by cyclophosphamide, methotrexate and 5-fluorouracil versus paclitaxel followed by epirubicin and vinorelbine in patients with high-risk operable breast cancer. *Oncology*; 2010. p. 274-81.
34. Oakman C, Francis PA, Crown J, et al. Overall survival benefit for sequential doxorubicin-docetaxel compared with concurrent doxorubicin and docetaxel in node-positive breast cancer--8-year results of the Breast International Group 02-98 phase III trial. *Annals of Oncology*; 2013. p. 1203-11.
35. Martin M, Rodriguez-Lescure A, Ruiz A, et al. Randomized phase 3 trial of fluorouracil, epirubicin, and cyclophosphamide alone or followed by Paclitaxel for early breast cancer. *J Natl Cancer Inst*; 2008. p. 805-14.
36. Joensuu H, Bono P, Kataja V, et al. Fluorouracil, epirubicin, and cyclophosphamide with either docetaxel or vinorelbine, with or without trastuzumab, as adjuvant treatments of breast cancer: final results of the FinHer Trial. *J Clin Oncol*; 2009. p. 5685-92.
37. Burnell M, Levine MN, Chapman J-AW, et al. Cyclophosphamide, epirubicin, and fluorouracil versus dose-dense epirubicin and cyclophosphamide followed by paclitaxel versus doxorubicin and cyclophosphamide followed by paclitaxel in node-positive or high-risk node-negative breast cancer. *J Clin Oncol*; 2010. p. 77-82.

38. Nitz U, Gluz O, Huober J, et al. Final analysis of the prospective WSG-AGO EC-Doc versus FEC phase III trial in intermediate-risk (pN1) early breast cancer: efficacy and predictive value of Ki67 expression. *Ann Oncol*; 2014. p. 1551-7.
39. Delbaldo C, Serin D, Mousseau M, et al. A phase III adjuvant randomised trial of 6 cycles of 5-fluorouracil-epirubicin-cyclophosphamide (FEC100) versus 4 FEC 100 followed by 4 Taxol (FEC-T) in node positive breast cancer patients (Trial B2000). *Eur J Cancer*; 2014. p. 23-30.
40. Tabchy A, Valero V, Vidaurre T, et al. Evaluation of a 30-gene paclitaxel, fluorouracil, doxorubicin, and cyclophosphamide chemotherapy response predictor in a multicenter randomized trial in breast cancer. *Clin Cancer Res*; 2010. p. 5351-61.
41. Martin M, Ruiz A, Ruiz Borrego M, et al. Fluorouracil, doxorubicin, and cyclophosphamide (FAC) versus FAC followed by weekly paclitaxel as adjuvant therapy for high-risk, node-negative breast cancer: results from the GEICAM/2003-02 study. *Journal of Clinical Oncology*; 2013. p. 2593-9.
42. Braun S, Kantenich C, Janni W, et al. Lack of effect of adjuvant chemotherapy on the elimination of single dormant tumor cells in bone marrow of high-risk breast cancer patients. *J Clin Oncol*; 2000. p. 80-6.
43. Malamos N, Kosmas C, Antonopoulos MJ, et al. Prospective randomized study of neoadjuvant chemotherapy (NACT) with paclitaxel/epirubicin (PE) versus fluorouracil/epirubicin/cyclophosphamide (FEC) in operable stage II-IIIa breast cancer (BC). *Ann Oncol*; 1998. p. A105P.
44. Kümmel S, Krockner J, Kohls A, et al. Randomised trial: survival benefit and safety of adjuvant dose-dense chemotherapy for node-positive breast cancer. *Br J Cancer*; 2006. p. 1237-44.
45. Gianni L, Baselga J, Eiermann W, et al. Phase III trial evaluating the addition of paclitaxel to doxorubicin followed by cyclophosphamide, methotrexate, and fluorouracil, as adjuvant or primary systemic therapy: European Cooperative Trial in Operable Breast Cancer. *J Clin Oncol*; 2009. p. 2474-81.
46. Del Mastro L, Levaggi A, Michelotti A, et al. 5-Fluorouracil, epirubicin and cyclophosphamide versus epirubicin and paclitaxel in node-positive early breast cancer: a phase-III randomized GONO-MIG5 trial. *Breast Cancer Res Treat*; 2016. p. 117-26.
47. Dieras V, Fumoleau P, Romieu G, et al. Randomized parallel study of doxorubicin plus paclitaxel and doxorubicin plus cyclophosphamide as neoadjuvant treatment of patients with breast cancer. *J Clin Oncol*; 2004. p. 4958-65.
48. Mackey JR, Martin M, Pienkowski T, et al. Adjuvant docetaxel, doxorubicin, and cyclophosphamide in node-positive breast cancer: 10-year follow-up of the phase 3 randomised BCIRG 001 trial. *Lancet Oncology*; 2013. p. 72-80.
49. Verma N, Harding D, Mohammadi A, et al. Image-based risk score to predict recurrence of ER+ breast cancer in ECOG-ACRIN Cancer Research Group E2197. *Journal of Clinical Oncology*; 2018. p. A540.
50. Martín M, Seguí MA, Antón A, et al. Adjuvant docetaxel for high-risk, node-negative breast cancer. *N Engl J Med*; 2010. p. 2200-10.
51. Mansi JL, Yellowlees A, Lipscombe J, et al. Five-year outcome for women randomised in a phase III trial comparing doxorubicin and cyclophosphamide with doxorubicin and docetaxel as primary medical therapy in early breast cancer: an Anglo-Celtic Cooperative Oncology Group study. *Breast Cancer Res Treat*; 2010. p. 787-94.
52. Brain EGC, Bachelot T, Serin D. Life-threatening complications from doxorubicin-docetaxel chemotherapy for breast cancer. *JAMA*; 2005. p. 2166-7.
53. Spielmann M, Roche H, Delozier T, et al. Trastuzumab for patients with axillary-node-positive breast cancer: results of the FNCLCC-PACS 04 trial. *J Clin Oncol*; 2009. p. 6129-34.
54. Semiglazov VF, Bojok AA, Arsumanov AS, et al. Breast conserving surgery after neoadjuvant chemotherapy paclitaxel + doxorubicin vs fluorouracil + doxorubicin + cyclophosphamide in locally advanced breast cancer. *Breast Cancer Res Treat*; 2002. p. S52, A159.
55. van Rossum AGJ, M. K, van Werkhoven E, et al. Adjuvant dose-dense doxorubicin-cyclophosphamide versus docetaxel-doxorubicin-cyclophosphamide for high-risk breast cancer: First results of the randomised MATADOR trial (BOOG 2004-04). *Eur J Cancer*; 2018. p. 40-8.
56. Roy C, Choudhury KB, Pal M, Saha A, Bag S, Banerjee C. Adjuvant chemotherapy with six cycles of AC regimen versus three cycles of AC regimen followed by three cycles of Paclitaxel in node-positive breast cancer. *Indian Journal of Cancer*; 2012. p. 266-71.
57. Albert JM, Buzdar AU, Guzman R, et al. Prospective randomized trial of 5-fluorouracil, doxorubicin, and cyclophosphamide (FAC) versus paclitaxel and FAC (TFAC) in patients with operable breast cancer: impact of taxane chemotherapy on locoregional control. *Breast Cancer Res Treat*; 2011. p. 421-7.
58. Hutcheon AW, Heys SD, Sarkar TK, et al. Docetaxel primary chemotherapy in breast cancer: a five year update of the Aberdeen trial. *Breast Cancer Res Treat*; 2003. p. S9, A11.

59. Coombes RC, Bliss JM, Espie M, et al. Randomized, phase III trial of sequential epirubicin and docetaxel versus epirubicin alone in postmenopausal patients with node-positive breast cancer. *J Clin Oncol*; 2011. p. 3247-54.
60. Coudert B, Asselain B, Campone M, et al. Extended benefit from sequential administration of docetaxel after standard fluorouracil, epirubicin, and cyclophosphamide regimen for node-positive breast cancer: the 8-year follow-up results of the UNICANCER-PACS01 trial. *Oncologist*; 2012. p. 900-9.
61. Ellis P, Barrett-Lee P, Johnson L, et al. Sequential docetaxel as adjuvant chemotherapy for early breast cancer (TACT): an open-label, phase III, randomised controlled trial. *Lancet*; 2009. p. 1681-92.
62. Bonnefoi H, Litiere S, Piccart M, et al. Pathological complete response after neoadjuvant chemotherapy is an independent predictive factor irrespective of simplified breast cancer intrinsic subtypes: a landmark and two-step approach analyses from the EORTC 10994/BIG 1-00 phase III trial. *Annals of Oncology*; 2014. p. 1128-36.
63. Janni W, Harbeck N, Rack B, et al. Randomised phase III trial of FEC120 vs EC-docetaxel in patients with high-risk node-positive primary breast cancer: final survival analysis of the ADEBAR study. *Br J Cancer*; 2016. p. 863-71.
64. Thomssen C, Kantelhardt EJ, Meisner C, et al. First planned efficacy analysis of the NNBC 3-Europe trial: Addition of docetaxel to anthracycline containing adjuvant chemotherapy in high risk node-negative breast cancer patients. *Cancer Res*; 2012. p. 199s, P1-13-13.
65. Brandi M, Sr., Petroni S, Stea B, et al. Randomized study testing as adjuvant chemotherapy the same primary (neoadjuvant) epirubicin/vinorelbine (EN) regimen versus docetaxel (TXT) in inflammatory breast cancer (IBC). *J Clin Oncol*; 2008. p. 28s, A590.
66. Jones SE, Savin MA, Holmes FA, et al. Phase III trial comparing doxorubicin plus cyclophosphamide with docetaxel plus cyclophosphamide as adjuvant therapy for operable breast cancer. *J Clin Oncol*; 2006. p. 5381-7.
67. Delaloge S, Piccart M, Rutgers E, et al. Standard anthracycline based versus docetaxel-capecitabine in early high clinical and/or genomic risk breast cancer in the EORTC 10041/BIG 3-04 MINDACT phase III trial. *J Clin Oncol*; 2020. p. Published online Feb 21, 2020.
68. Marcom PK, Barry W, Datto MB, et al. A randomized phase II trial evaluating the performance of genomic expression profiles to direct the use of preoperative chemotherapy for early-stage breast cancer. *J Clin Oncol*; 2010. p. 7S, TPS102.
69. Mathiesen RR, Nesland JM, Renolen A, et al. Prognostic impact of disseminated and circulating tumor cells in patients treated for locally advanced breast cancer. *Cancer Res*; 2011. p. 444s, P4-06-05.
70. Shulman LN, Berry DA, Cirincione CT, et al. Comparison of doxorubicin and cyclophosphamide versus single-agent paclitaxel as adjuvant therapy for breast cancer in women with 0 to 3 positive axillary nodes: CALGB 40101 (Alliance). *Journal of Clinical Oncology*; 2014. p. 2311-7.
71. Sparano JA, Zhao F, Martino F, et al. Long-term follow-up of the E1199 phase III trial evaluating the role of taxane and schedule in operable breast cancer. *J Clin Oncol*; 2015. p. 2353-60.
72. Geyer CE, Jr., Bandos H, Rastogi P, et al. Definitive results of a phase III adjuvant trial comparing six cycles of FEC-100 to four cycles of AC in women with operable node-negative breast cancer: the NSABP B-36 trial (NRG Oncology). *Breast Cancer Res Treat*; 2022.
73. Saloustros E, Malamos N, Boukovinas I, et al. Dose-dense paclitaxel versus docetaxel following FEC as adjuvant chemotherapy in axillary node-positive early breast cancer: a multicenter randomized study of the Hellenic Oncology Research Group (HORG). *Breast Cancer Research & Treatment*; 2014. p. 591-7.
74. Abdel-Halim I, El-Sadda W. Adriamycin & cyclophosphamide (AC) followed by docetaxel (D) versus AC followed by paclitaxel (P) in operable node positive breast cancer. *Breast*; 2011. p. S65, P274.
75. Fountzilas G, Dafni U, Papadimitriou C, et al. Dose-dense sequential adjuvant chemotherapy followed, as indicated, by trastuzumab for one year in patients with early breast cancer: first report at 5-year median follow-up of a Hellenic Cooperative Oncology Group randomized phase III trial. *BMC Cancer*; 2014. p. 515.
76. Green MC, Buzdar AU, Smith T, et al. Weekly paclitaxel improves pathologic complete remission in operable breast cancer when compared with paclitaxel once every 3 weeks. *J Clin Oncol*; 2005. p. 5983-92.
77. Budd GT, Barlow WE, Moore HC, et al. SWOG S0221: a phase III trial comparing chemotherapy schedules in high-risk early-stage breast cancer. *J Clin Oncol*; 2015. p. 58-64.
78. Qi M, Li JF, Xie YT, Lu AP, Lin BY, Ouyang T. Weekly paclitaxel improved pathologic response of primary chemotherapy compared with standard 3 weeks schedule in primary breast cancer. *Breast Cancer Res Treat*; 2010. p. 197-202.
79. Walker LG, Eremin JM, Aloysius MM, et al. Effects on quality of life, anti-cancer responses, breast conserving surgery and survival with neoadjuvant docetaxel: a randomised study of sequential weekly versus three-weekly docetaxel following neoadjuvant doxorubicin and cyclophosphamide in women with primary breast cancer. *BMC Cancer*; 2011. p. 179.

80. Nuzzo F, Morabito A, Gravina A, et al. Effects on quality of life of weekly docetaxel-based chemotherapy in patients with locally advanced or metastatic breast cancer: results of a single-centre randomized phase 3 trial. *BMC Cancer*; 2011. p. 75.
81. Wildiers H, Dirix L, Neven P, et al. Delivery of adjuvant sequential dose-dense FEC-Doc to patients with breast cancer is feasible, but dose reductions and toxicity are dependent on treatment sequence. *Breast Cancer Res Treat*; 2009. p. 103-12.
82. Taghian AG, Abi Raad R, Assaad SI, et al. Paclitaxel decreases the interstitial fluid pressure and improves oxygenation in breast cancers in patients treated with neoadjuvant chemotherapy: clinical implications. *J Clin Oncol*; 2005. p. 1951-61.
83. Zelnak AB, Styblo TM, Rizzo M, et al. Final results from phase II trial of neoadjuvant docetaxel and capecitabine given sequentially or concurrently for HER2-negative breast cancers. *Clinical Breast Cancer*; 2013. p. 173-9.
84. Lee KS, Ro J, Nam BH, et al. A randomized phase-III trial of docetaxel/capecitabine versus doxorubicin/cyclophosphamide as primary chemotherapy for patients with stage II/III breast cancer. *Breast Cancer Res Treat*; 2008. p. 481-9.
85. Piedbois P, Serin D, Priou F, et al. Dose-dense adjuvant chemotherapy in node-positive breast cancer: docetaxel followed by epirubicin/cyclophosphamide (T/EC), or the reverse sequence (EC/T), every 2 weeks, versus docetaxel, epirubicin and cyclophosphamide (TEC) every 3 weeks. AERO B03 randomized phase II study. *Ann Oncol*; 2007. p. 52-7.
86. Makris A, Creighton C, Osborne KC, et al. Predictive gene expression patterns of response to adriamycin and cyclophosphamide (AC) in human breast cancers. *J Clin Oncol*; 2007. p. 9s, A527.
87. Miyashita M, Kohno N, Takao S, et al. Randomized phase II clinical trial of comparison of epirubicin (E) plus cyclophosphamide (C) and weekly paclitaxel (P) as primary systemic therapy (PST) in patients (pts) with stages II and III breast cancer (BC). *J Clin Oncol*; 2008. p. 23s, A568.
88. Puhalla S, Mrozek E, Young D, et al. Randomized phase II adjuvant trial of dose-dense docetaxel before or after doxorubicin plus cyclophosphamide in axillary node-positive breast cancer. *J Clin Oncol*; 2008. p. 1691-7.
89. Alamgeer M, Ganju V, Kumar B, et al. Changes in aldehyde dehydrogenase-1 expression during neoadjuvant chemotherapy predict outcome in locally advanced breast cancer. *Breast Cancer Research*; 2014. p. R44.
90. Earl HM, Vallier AL, Hiller L, et al. Effects of the addition of gemcitabine, and paclitaxel-first sequencing, in neoadjuvant sequential epirubicin, cyclophosphamide, and paclitaxel for women with high-risk early breast cancer (Neo-tAnGo): an open-label, 2x2 factorial randomised phase 3 trial. *Lancet Oncology*; 2014. p. 201-12.
91. Martin M, Romero A, Cheang MCU, et al. Genomic predictors of response to doxorubicin versus docetaxel in primary breast cancer. *Breast Cancer Research and Treatment*; 2011. p. 127-36.
92. Abe H, Mori T, Kawai Y, Cho H, Kubota Y, Umeda T. Feasibility and toxicity of docetaxel before or after fluorouracil, epirubicin and cyclophosphamide as adjuvant chemotherapy for early breast cancer. *Int J Clin Oncol*; 2013. p. 487-91.
93. Buzdar AU, Suman VJ, Meric-Bernstam F. Disease-free and overall survival among patients with operable HER2-positive breast cancer treated with sequential vs concurrent chemotherapy. The ACOSOG Z1041 (Alliance) randomized clinical trial. *JAMA Oncol*; 2019. p. 45-50.
94. Nahleh ZA, Barlow WE, Hayes DF, et al. SWOG S0800 (NCI CDR0000636131): addition of bevacizumab to neoadjuvant nab-paclitaxel with dose-dense doxorubicin and cyclophosphamide improves pathologic complete response (pCR) rates in inflammatory or locally advanced breast cancer. *Breast Cancer Res Treat*; 2016. p. 485-95.
95. Bines J, Small I, Sarmiento R, et al. Does the sequence of anthracycline and taxane matter? The NeoSAMBA trial. *Oncologist*; 2020. p. 758-64.
96. Griem K, Henderson I, Gelman R, et al. The 5 year results of a randomized trial of adjuvant radiation therapy after chemotherapy in breast cancer patients treated with mastectomy. *J Clin Oncol*; 1987. p. 1546-55.
97. Fumoleau P, Kerbrat P, Romestaing P, et al. Randomized trial comparing six versus three cycles of epirubicin-based adjuvant chemotherapy in premenopausal, node-positive breast cancer patients: 10-year follow-up results of the French Adjuvant Study Group 01 trial. *J Clin Oncol*; 2003. p. 298-305.
98. Chacon R, Blajman C, Galvez C, et al. Adjuvant chemotherapy for premenopausal, stage ii, node-positive breast cancer patients (pronacam 87): first analysis. The pronacam group (meeting abstract). *Proc Annu Meet Am Soc Clin Oncol*; 1995. p. A162.
99. Kerbrat P, Desmoulins I, Roca L, et al. Optimal duration of adjuvant chemotherapy for high-risk node-negative (N-) breast cancer patients: 6-year results of the prospective randomised multicentre phase III UNICANCER-PACS 05 trial (UCBG-0106). *Eur J Cancer*; 2017. p. 166-75.

100. Romieu G, Tubiana-Hukin M, Fumoleau P, et al. A multicenter randomized phase II study of 4 or 6 cycles of adriamycin/Taxol [R] (paclitaxel) (AT) as neoadjuvant treatment of breast cancer (BC). *Ann Oncol*; 2002. p. 33, A118.
101. Steger GG, Galid A, Gnant M, et al. Pathologic complete response with six compared with three cycles of neoadjuvant epirubicin plus docetaxel and granulocyte colony-stimulating factor in operable breast cancer: results of ABCSG-14. *J Clin Oncol*; 2007. p. 2012-8.
102. Huober J, von Minckwitz G, Denkert C, et al. Effect of neoadjuvant anthracycline-taxane-based chemotherapy in different biological breast cancer phenotypes: overall results from the GeparTrio study. *Breast Cancer Res Treat*; 2010. p. 133-40.
103. Han S, Kim J, Lee J, et al. Comparison of 6 cycles versus 4 cycles of neoadjuvant epirubicin plus docetaxel chemotherapy in stages II and III breast cancer. *Eur J Surg Oncol*; 2009. p. 583-7.
104. Kahan Z, Spanik S, Wagnerova M, et al. Feasibility of two dose-dense FEC regimens with growth factor support for adjuvant therapy in patients with early breast cancer: Results from a randomised study of the Central European Cooperative Oncology Group (CECOG). *Breast Cancer Res Treat*; 2008. p. 557-63.
105. Bonnetterre J, Roche H, Kerbrat P, et al. Epirubicin increases long-term survival in adjuvant chemotherapy of patients with poor-prognosis, node-positive, early breast cancer: 10-year follow-up results of the French Adjuvant Study Group 05 randomized trial. *J Clin Oncol*; 2005. p. 2686-93.
106. Coombes RC, Kilburn LS, Tubiana-Mathieu N, et al. Epirubicin dose and sequential hormonal therapy-Mature results of the HMFEC randomised phase III trial in premenopausal patients with node positive early breast cancer. *Eur J Cancer*; 2016. p. 146-53.
107. Hui R, Zhang M, Hao XM, Zhang J. [Comparison of tolerance and toxicity of CEF-100 regimen versus CEF-60 regimen as adjuvant therapy for breast cancer] [Chinese]. *Chung Hua Chung Liu Tsa Chih*; 2007. p. 871-4.
108. Brambilla C, Rossi A, Valagussa P, Bonadonna G. Adjuvant chemotherapy in postmenopausal women: Results of sequential noncross resistant regimens. *World J Surg*; 1985. p. 728-37.
109. de Azambuja E, Paesmans M, Beauduin M, et al. Long-term benefit of high-dose epirubicin in adjuvant chemotherapy for node-positive breast cancer: 15-year efficacy results of the Belgian multicentre study. *J Clin Oncol*; 2009. p. 720-5.
110. Wood WC, Budman DR, Korzun AH, et al. Dose and dose intensity of adjuvant chemotherapy for stage II, node positive breast carcinoma. *N Engl J Med*; 1994. p. 1253-9.
111. Dhingra K, Esparza-Guerra L, Valero V, et al. A Phase III Randomized Trial of Dose-Intensive, Neoadjuvant 5FU, Doxorubicin, Cyclophosphamide (FAC) with G-CSF (filgrastim) in Locally Advanced Breast Cancer (LABC)-Efficacy and Safety Data. *Proc Annu Meet Am Soc Clin Oncol*; 1999. p. A278.
112. Dyczka J, Czernek U, Pluzanska A. Evaluation of efficacy three schedules with different doses of epirubicin in adjuvant treatment of breast cancer with high risk factors - Randomized clinical trial. *Onkol Pols*; 2003. p. 11-3.
113. Pélissier P, Delaloge S, Mathieu M-C, et al. Intensified anthracyclin doses do not improve clinical and pathological responses to neoadjuvant FEC for operable breast cancer (BC): results of a multicenter randomized trial. *Proc Annu Meet Am Soc Clin Oncol*; 2002. p. 64a, A254.
114. Lindman H, Andersson M, Ahlgren J, et al. A randomised study of tailored toxicity-based dosage of fluorouracil-epirubicin-cyclophosphamide chemotherapy for early breast cancer (SBG 2000-1). *Eur J Cancer*; 2018. p. 79-86.
115. Matikas A, Margolin S, Hellstrom M, et al. Long-term safety and survival outcomes from the Scandinavian Breast Group 2004-1 randomized phase II trial of tailored dose-dense adjuvant chemotherapy for early breast cancer. *Breast Cancer Res Treat*; 2018. p. 349-55.
116. Mavoudis D, Matikas A, Malamos N, et al. Dose-dense FEC followed by docetaxel versus docetaxel plus cyclophosphamide in women with HER2-negative, axillary lymph node-positive early breast cancer: a multicentre randomized study by the Hellenic Oncology Research Group (HORG). *Annals of Oncology*; 2016. p.1873-1878.



## Appendix 2 – EBCTCG seventh cycle: List of variables for taxane trials

**Either using the codes we suggest below or using your own codes**, please extract from your dataset the variables that correspond most closely to the items listed below and send them to us. Please provide one record for each woman ever randomised (including anyone who was randomised and then was later categorised as ineligible, withdrawn, unevaluable, lost or "protocol deviant" – but, please tell us in question 9 which patients your group's preferred analyses would exclude, and why).

For trials where a dataset has previously been sent to the EBCTCG it is probably easiest and most reliable to update by re-sending all variables. If, however, this would cause difficulties then you can send only the additional variables; let us know if you want a file of the data you previously sent and we will provide it.

**If any variable is not available or not applicable, please omit it** and send only the remaining variables. If you have any of the requested variables in your records in a form that would require substantial additional work to supply (eg computerisation, or manual coding), please feel free to omit them for now, but in your cover document please tell us of their existence.

- Please send your data in a separate Excel spreadsheet for each separate trial, if possible.
- Please send a cover document giving all your coding conventions (including your format for dates).
- Please send your data to: [bc.overview@ctsu.ox.ac.uk](mailto:bc.overview@ctsu.ox.ac.uk) with your research group's name (and/or the EBCTCG number for your research group) and your group's name for the trial in the subject line.

**If you have any questions** about this data request, please contact the EBCTCG secretariat on [bc.overview@ndph.ox.ac.uk](mailto:bc.overview@ndph.ox.ac.uk) (tel: +44-1865-743852). All data supplied to the secretariat will be held securely and treated confidentially, in accordance with UK Medical Research Council data security policies.

### CORE VARIABLES - BASELINE (Q1-28)

---

#### A) RANDOMISATION AND PATIENT CHARACTERISTICS (Q1-9)

1. **Your patient identifier** (*preferably specifying uniquely which trial as well as which patient*)
2. **Date of randomisation** (*specify your format for dates [in your covering document]*)
3. **Allocated treatment** (*specify your codes*)
4. **Age at randomisation (years)** **NB Here & everywhere else, leaving an item Blank means Not Known**
5. **Height at randomisation (m)**
6. **Weight at randomisation (kg)**
7. **Menopausal status at randomisation** (1=pre-, 2=peri-, 3=postmenopausal with intact ovaries & uterus, 4=ovarian ablation, 5=hysterectomy, 6=both [ie, 4 and 5])
8. **Did chemotherapy cause apparently permanent cessation of menses?** (1=no/not applicable, 2=yes)
9. **Would your group's preferred analyses exclude this patient?** NB A few trial patients may be randomised in error, otherwise ineligible, lost with no follow-up, unevaluable or withdraw consent. (1=no known reason for exclusion, 2=yes [specify main reason(s) for preferring exclusion, if known])

#### B) SURGICAL DETAILS (Q10-12; OR, DEFINE AND USE YOUR OWN CODES)

10. **Date of surgery** *Please provide date patient received surgery if known.*
11. **Breast surgery** (1=none, 2=only lumpectomy or wide local excision, 3=quadrantectomy or sector resection, 4=partial mastectomy, 5=simple or total mastectomy, 6=radical mastectomy)
12. **Axillary surgery** (1=none, 2=sentinel node biopsy only, 3=axillary sampling, 4=surgical clearance of less than levels I & II, 5=full clearance of axillary levels I & II, 6=clearance of more than levels I & II, 7=axillary clearance, but levels cleared unspecified)

#### C) NODAL STATUS (Q13-14; OR, USE YOUR OWN CODES [EG, TNM])

13. **Sentinel node biopsy** (1=not done, 2=done and negative for cancer, 3= isolated tumour cells [ $\leq 0.2$  mm], 4=micrometastasis, 5=macroscopic nodal deposit [ $> 2$  mm], 6=positive, size unknown)
14. **Axillary status** (*specify codes, or: 1=N- histologically, 2=N- other/unknown method, 3=1-3 positive nodes, 4=4-9 [or 4+] positive, 5=10+ positive, 6=N+ histologically, unknown number, 7=N+ other/unknown method*)

#### D) TUMOUR CHARACTERISTICS (Q15-19; OR, USE YOUR OWN CODES [EG, TNM])

15. **Method first detected** (1=mammographic screening, 2=incidental, 3=symptomatic, 4=other)
16. **Laterality** (1=left, 2=right, 3=bilateral)
17. **Pathological grade** (1=well differentiated, 2=moderately, 3=poorly)
18. **Histological type** (1=invading, not otherwise specified, 2=ductal, 3=lobular, 4=other, 5=mixed)
19. **Tumour diameter in mm: largest diameter of excised primary (mm)**

**E) RECEPTOR STATUS (Q20-28; OR, USE YOUR OWN CODES)**

20. **Summary of Estrogen Receptor (ER) status of primary tumour** (1=ER-poor, 2=ER+, 3=ER++  
*[define in cover document, unless ER-poor is <10 fm/mg and ER++ is ER definitely ≥100 fm/mg]*)
21. **Quantitative ER measurement** (*measured in central/reference lab if possible, otherwise best available*)
22. **Units for ER** (1=fm/mg, 2=% +ve by IHC, 3=Allred score [category score], 4=H-score, 9=other [specify])
23. **Summary of Progesterone Receptor (PR) status of primary tumour** (1=PR-poor, 2=PR+, 3=PR++  
*[define in cover document, unless PR-poor is <10 fm/mg and PR++ is PR definitely ≥100 fm/mg]*)
24. **Quantitative PR measurement** (*done in central/reference lab if possible, otherwise best available*)
25. **Units for PR** (*coded as Q21*)
26. **Summary of HER2 status of primary** (1=negative/normal, 2=positive/over-expressing)
27. **Quantitative HER2 measurement** (*done in central/reference lab if possible, otherwise best available*)
28. **Units for HER2** (1=IHC [% staining], 2=IHC score [0, 1+, 2+, 3+], 3=FISH [# copies], 4=FISH [HER2:CEP17 ratio], 5=CISH [# copies], 6=CISH [HER2:CEP17], 9=other [please specify])

---

**CORE VARIABLES – FOLLOW-UP (Q29-47)**

---

**F) ADJUVANT TREATMENT (Q29-33; OR, USE YOUR OWN CODES)**

29. **Chemotherapy given** (1=No, 2=Yes, 3=Unknown)
30. **Date of start of endocrine therapy** (*Please provide date patient started endocrine therapy if known, else date of surgery.*)
31. **Date Endocrine therapy stopped**
32. **Any substantial deviation from trial treatment allocation (before any breast cancer recurrence)?**  
(1=no, 2=never started, 3=discontinued, 4=switched to opposite trial group, 5=other [specify])
33. **Date of first such deviation from allocated treatment** (*ignore deviations after recurrence*)

**G) CANCER RECURRENCE AND SECOND CANCERS (Q34-44; OR, USE YOUR OWN CODES)**

34. **Any recurrence of invasive breast cancer (ie, locoregional, contralateral or distant)?**  
NB Includes any occurrence of new ipsilateral or contralateral breast cancer (1=no, 2=yes)
35. **If no: Date patient last known to be free of such recurrence; If yes: Date of first such recurrence**
36. **Site of first distant recurrence (ie, possibly distant; not just locoregional/contralateral)**  
(1=no distant recurrence, 2=recurrence, unknown if distant, 3=distant recurrence, unknown/multiple sites, 4=only in distant soft tissue, 5=only in distant nodes, 6=only in bone, 7=only visceral, 8=only in CNS)
37. **Date of first distant recurrence** NB Locoregional recurrence can precede first distant recurrence
38. **Site of first locoregional recurrence** (1=no locoregional recurrence recorded, 2=multiple or unspecified locoregional sites 3=only in breast [new or recurrent cancer] or chest wall, 4=only in axilla, 5=only in other locoregional nodes [eg, supraclavicular or internal mammary])
39. **Date of first locoregional recurrence**
40. **Contralateral breast cancer?** (1=no, 2=yes: new invasive cancer thought to have arisen during follow-up in the contralateral breast)
41. **Date of first contralateral breast cancer**

**NB If patient had more than one second malignancy during follow-up, repeat variables 38-40 for each.**

42. **Site of any second malignancy [except breast cancer] during follow-up** (*Describe ALL sites. Use and specify your own codes; if you use ICD codes specify revision, eg ICD-9 or ICD-10*)
43. **Date of this second malignancy**
44. **MIGHT this have been a breast cancer metastasis?** (1=no, 2=possibly/not yet certain [eg, possible lung, liver, bone or brain metastasis: please do not report definite breast metastases as second cancers])

**H) SURVIVAL (Q45-47)**

45. **Is patient known to have died?** (1=no, 2=yes)
46. **If no: Date patient last known to be alive; If yes: Date of death**
47. **If yes: Cause of death** (*use and specify your own codes; if you use ICD codes specify which version, eg ICD-9 or ICD-10*)

---

## ADDITIONAL VARIABLES (Q48-58)

---

### I) ADDITIONAL TUMOUR MARKER DATA (Q48-56; OR, USE YOUR OWN CODES)

Note: If tests of gene expression or special tests of IHC quantitation were done on the excised primary then please send a separate file in your own format with the fully detailed set of results on each individual.

48. **Summary of gene-expression status of primary tumour** (1=low risk, 2=intermediate risk, 3=high risk):  
NB Please also provide the fully detailed gene expression results for each patient as a separate dataset.
49. **Quantitative gene-expression prognostic score** (best available single numerical measure)
50. **Prognostic score used to quantify gene expression profile** (use own code, or: 1=OncotypeDx prognostic score, 2=Mammaprint prognostic score, 9=other [please specify])
51. **Summary of Topo-isomerase II alpha (TOPO2A) status of primary tumour**  
(1= normal [ie, no gene over-expression or deletion], 2=positive/over-expressing, 3=deleted)
52. **Quantitative TOPO2A measurement** (done in central/reference laboratory if possible)
53. **Units for TOPO2A** (1=IHC [% staining], 2=IHC score [0, 1+, 2+, 3+], 3=FISH [number of copies], 4=FISH [TOPO:CEP17 ratio], 5=CISH [# copies], 6=CISH [TOPO:CEP17], 9=other [please specify])
54. **Summary of Proliferation Index of primary tumour** (1=low, 2=intermediate, 3=high)
55. **Quantitative Proliferation Index** (best available single numerical measure, in central/ ref lab if possible)
56. **Factor measured for Proliferation Index** (1=S-phase fraction [%], 2=thymidine labelling index [%], 3=Ki-67 by IHC [% staining], 9=other [please specify])

### J) BONE FRACTURES AND CARDIOVASCULAR EVENTS BEFORE RECURRENCE (Q57-58; OMIT IF NOT SOUGHT)

Some trial treatments may cause or prevent bone fractures or cardiovascular events. Please describe all such events (eg, hip fracture, spinal fracture, myocardial infarction, stroke, pulmonary embolus, episode of cardiac failure) if, but only if, such events were sought and recorded systematically for the trial.

If more than one bone fracture or cardiovascular event was recorded, repeat variables 55-56 for each.

57. **Nature of event** (use your own codes; if you use ICD codes, specify which version, eg ICD-9 or ICD-10, and if you use CTC Adverse Event codes, please specify version number, eg CTCAE-3 or CTCAE-4)
58. **Date of event**

## **P92-94: Search strategies**

Assessment of treatment effects in EBCTCG meta-analyses involves identification of all available randomised data, wherever possible, including not only published but also unpublished trial results (with follow-up updated, where records permit, beyond the last available publication). The searches and updating are both important because trial results that do not show significant treatment effects initially, or that become less promising with longer follow-up, may be less likely to be published, or have updates published, than other trial results.

To achieve unbiased ascertainment of the randomised evidence, the EBCTCG secretariat remains in regular contact with all known trials that still have an active investigator (or an active successor), and has for decades been seeking both published and unpublished trials by interactions with all known trialists as well as by electronic searches and scans of potentially relevant reference lists. Hence, the unbiasedness of the meta-analyses in EBCTCG reports depends not on whether there would have been *publication* bias if the EBCTCG dataset was restricted to published data (for it has no such restriction), but whether, despite all efforts, any material *ascertainment* bias remains.

Formal statistical tests for publication bias or ascertainment bias are so weak that appreciable bias might escape them, scientifically reliable assessment of the potential for such bias should chiefly be based on an understanding of EBCTCG procedures for identifying trials and obtaining and updating the results according to the randomly allocated treatment (with no potentially biased exclusions, regardless of what the trial publications excluded). These EBCTCG methods are described below.

The EBCTCG secretariat request regular data updates from trialists, and include the latest available data in meta-analyses. Where only certain trial arms or patient groups of a particular trial are relevant to a given question, they are also included.

The need to include all available eligible randomised data has led to the development of comprehensive methods of identifying published and unpublished trials. The EBCTCG has existed for more than 30 years and the methods for identifying studies have developed over this period. The search strategy is comprehensive and labour-intensive. It involves a team of six research assistants who search databases and conference proceedings, and assess the search results.

### i) Database searches

The EBCTCG secretariat has been performing methodical literature searches since the 1980s and the search strategy has developed over this period. Initially trials were sought through

literature searches, contact with research groups worldwide and with pharmaceutical companies. Later, this was extended over a wider range of databases, trial registers, conference proceedings and adverts/surveys.

In recent years database searches of MEDLINE, Embase and the Cochrane Library are conducted on a regular basis using the following search terms:

1 random\$.af.  
2 ((singl\$ or doubl\$ or trebl\$ or tripl\$) adj (blind\$ or mask\$)).af.  
3 (phase III or phase 3 or phase IV or phase 4).af.  
4 controlled clinical trial\$.af.  
5 placebo\$.af.  
6 (meta?analys\$ or (meta adj1 analys\$)).af.  
7 1 or 2 or 3 or 4 or 5 or 6  
8 exp breast neoplasms/  
9 (breast\$ adj5 (neoplas\$ or carcinom\$ or cancer\$ or tumor\$ or tumour\$)).af.  
10 (advanced or metastatic or inoperable).ti.  
11 locally advanced.af. or (neoadjuvant or adjuvant or early or operable).ti.  
12 10 not 11  
13 (8 or 9) not 12  
14 7 and 13  
15 Human\$/  
16 Animal\$/  
17 16 not (15 and 16)  
18 14 not 17  
19 18

Search results are screened manually. Further information is sought for any search results which indicate a possible eligible trial.

ii) Conference proceedings

Lists of titles and abstracts of cancer conferences are searched systematically. Research assistants read all titles and abstracts from each conference listed below. Further information is sought for any search results which indicate a possible eligible trial.

- San Antonio Breast Cancer Congress
- American Society of Clinical Oncology
- European Cancer Organisation
- European Society of Medical Oncology

iii) EBCTCG Steering Committee

These searches are supplemented by input from breast cancer trialists' around the world. The EBCTCG's Steering Committee includes 56 individuals from 17 countries. The committee meet annually to discuss progress. They review lists of included trials in ongoing meta-

analyses. Committee members are invited to consider whether any eligible trials have been omitted and, if so, to provide contacts for any missing trials.

iv) EBCTCG Collaborative Group

The EBCTCG Collaborative group includes >500 individuals representing >200 trial groups from >30 countries. Each draft manuscript is circulated to the collaborative group before submission, giving further opportunity for any unpublished trials to be identified.

These methods have led to the compilation of a database of some 40,000 articles of relevance to EBCTCG overviews (by 1.1.2023), which continues to be populated on a regular basis, with additional targeted updates for any meta-analyses prior to submission for publication.

*Methods to assess integrity of individual trial data*

For each meta-analysis, a study protocol is developed by the EBCTCG secretariat in conjunction with leads of the trials which may contribute to the analysis. A data request, outlining the variables required, is sent to each contributing trial group. Received data are standardised and added to the EBCTCG database enabling various tests of internal integrity. Data are then checked against published reports and assessed for valid randomisation sequence, balance of baseline variables and follow-up dates across the intervention groups. A summary report is sent back to the trialist, and any queries resolved. Issues relating to the non-availability of data, for example because they are not supplied for unpublished studies, are discussed in each EBCTCG report.
